# Supplementary material
Source: MDPI journal article supplement (https://www.mdpi.com/2304-6740/12/5/135)
Supplement: s1 [file s1]

Archive with 3 entries (3 files):
- 2_3_3-decomposition_and_4.cif
- 2_3_3-decomposition_and_4_checkcif.pdf
- Aryl-BIAN-Bi_Supporting_Information.pdf
