# Supplementary material
Source: MDPI journal article supplement (https://www.mdpi.com/2304-6740/12/5/135)
Supplement: s1 [file s1 › 2_3_3-decomposition_and_4.cif]

data_publication_text
_publ_requested_journal          Inorganics
_publ_contact_author_name        'Clara S. B. Gomes'
_publ_contact_author_address     
"LAQV-REQUIMTE, Departmento de Qu\'imica, Faculdade de Ci\^encias e Tecnologia, Universidade NOVA de Lisboa, 2829-516 Caparica, Portugal"
_publ_contact_author_email       clara.gomes@fct.unl.pt
loop_
_publ_author_name
_publ_author_address
'Machado, B. P.'
"LAQV-REQUIMTE, Departmento de Qu\'imica, Faculdade de Ci\^encias e Tecnologia, Universidade NOVA de Lisboa, 2829-516 Caparica, Portugal"
'Celador-Garcia, M.'
"LAQV-REQUIMTE, Departmento de Qu\'imica, Faculdade de Ci\^encias e Tecnologia, Universidade NOVA de Lisboa, 2829-516 Caparica, Portugal"
'Rosa, V.'
"LAQV-REQUIMTE, Departmento de Qu\'imica, Faculdade de Ci\^encias e Tecnologia, Universidade NOVA de Lisboa, 2829-516 Caparica, Portugal"
'Gomes, Clara S. B.'
"LAQV-REQUIMTE, Departmento de Qu\'imica, Faculdade de Ci\^encias e Tecnologia, Universidade NOVA de Lisboa, 2829-516 Caparica, Portugal"


 
data_2

_audit_creation_method           SHELXL-2019/3
_shelx_SHELXL_version_number     2019/3
_chemical_name_systematic        ?
_chemical_name_common            ?
_chemical_formula_moiety         'C36 H40 Bi Cl3 N2'
_chemical_formula_sum            'C36 H40 Bi Cl3 N2'
_chemical_melting_point          ?

_exptl_crystal_description       prism
_exptl_crystal_colour            orange
_diffrn_ambient_temperature      293(2)
_chemical_formula_weight         816.05

loop_
_atom_type_symbol
_atom_type_description
_atom_type_scat_dispersion_real
_atom_type_scat_dispersion_imag
_atom_type_scat_source
C C 0.0033 0.0016 'International Tables Vol C Tables 4.2.6.8 and 6.1.1.4'
H H 0.0000 0.0000 'International Tables Vol C Tables 4.2.6.8 and 6.1.1.4'
N N 0.0061 0.0033 'International Tables Vol C Tables 4.2.6.8 and 6.1.1.4'
Cl Cl 0.1484 0.1585 'International Tables Vol C Tables 4.2.6.8 and 6.1.1.4'
Bi Bi -4.1077 10.2566 'International Tables Vol C Tables 4.2.6.8 and 6.1.1.4'

_space_group_crystal_system      monoclinic
_space_group_IT_number           15
_space_group_name_H-M_alt        'I 2/a'
_space_group_name_Hall           '-I 2ya'
_chemical_absolute_configuration ?

loop_
_space_group_symop_operation_xyz
'x, y, z'
'-x+1/2, y, -z'
'x+1/2, y+1/2, z+1/2'
'-x+1, y+1/2, -z+1/2'
'-x, -y, -z'
'x-1/2, -y, z'
'-x+1/2, -y+1/2, -z+1/2'
'x, -y+1/2, z+1/2'

_shelx_space_group_comment       
;
The symmetry employed for this shelxl refinement is uniquely defined
by the following loop, which should always be used as a source of
symmetry information in preference to the above space-group names.
They are only intended as comments.
;

_cell_length_a                   23.176(12)
_cell_length_b                   12.210(5)
_cell_length_c                   28.154(12)
_cell_angle_alpha                90
_cell_angle_beta                 98.17(4)
_cell_angle_gamma                90
_cell_volume                     7886(6)
_cell_formula_units_Z            8
_cell_measurement_temperature    293(2)
_cell_measurement_reflns_used    6034
_cell_measurement_theta_min      2.45
_cell_measurement_theta_max      25.29
_exptl_crystal_density_meas      ?
_exptl_crystal_density_method    ?
_exptl_crystal_density_diffrn    1.375
_exptl_crystal_F_000             3232
_exptl_transmission_factor_min   ?
_exptl_transmission_factor_max   ?
_exptl_crystal_size_max          0.300
_exptl_crystal_size_mid          0.200
_exptl_crystal_size_min          0.160
_exptl_absorpt_coefficient_mu    4.698
_shelx_estimated_absorpt_T_min   0.333
_shelx_estimated_absorpt_T_max   0.520
_exptl_absorpt_correction_type   multi-scan
_exptl_absorpt_correction_T_min  0.3467
_exptl_absorpt_correction_T_max  0.7454
_exptl_absorpt_process_details   
;
 SADABS 2016/2: Krause, L., Herbst-Irmer, R., Sheldrick G.M. & Stalke D.,
 J. Appl. Cryst. 48 (2015) 3-10
;
_exptl_absorpt_special_details   ?
_diffrn_radiation_probe          x-ray
_diffrn_radiation_type           MoK\a
_diffrn_radiation_wavelength     0.71073
_diffrn_source                   ?
_diffrn_measurement_device_type  'Bruker D8 Venture Photon II'
_diffrn_measurement_method       '\f and \w scans'
_diffrn_detector_area_resol_mean ?
_diffrn_reflns_number            56725
_diffrn_reflns_av_unetI/netI     0.1361
_diffrn_reflns_av_R_equivalents  0.2648
_diffrn_reflns_limit_h_min       -27
_diffrn_reflns_limit_h_max       27
_diffrn_reflns_limit_k_min       -14
_diffrn_reflns_limit_k_max       14
_diffrn_reflns_limit_l_min       -33
_diffrn_reflns_limit_l_max       33
_diffrn_reflns_theta_min         3.105
_diffrn_reflns_theta_max         25.347
_diffrn_reflns_theta_full        25.242
_diffrn_measured_fraction_theta_max 0.994
_diffrn_measured_fraction_theta_full 0.994
_diffrn_reflns_Laue_measured_fraction_max 0.994
_diffrn_reflns_Laue_measured_fraction_full 0.994
_diffrn_reflns_point_group_measured_fraction_max 0.994
_diffrn_reflns_point_group_measured_fraction_full 0.994
_reflns_number_total             7180
_reflns_number_gt                4937
_reflns_threshold_expression     'I > 2\s(I)'
_reflns_Friedel_coverage         0.000
_reflns_Friedel_fraction_max     .
_reflns_Friedel_fraction_full    .

_reflns_special_details          
;
 Reflections were merged by SHELXL according to the crystal
 class for the calculation of statistics and refinement.
 
 Structure factors included contributions from the .fab file.
 
 _reflns_Friedel_fraction is defined as the number of unique
 Friedel pairs measured divided by the number that would be
 possible theoretically, ignoring centric projections and
 systematic absences.
;

_computing_data_collection       'Bruker APEX4'
_computing_cell_refinement       'Bruker SAINT'
_computing_data_reduction        'Bruker SAINT'
_computing_structure_solution    'SHELXT 2018/2 (Sheldrick 2008)'
_computing_structure_refinement  'SHELXL-2019/2 (Sheldrick, 2019)'
_computing_molecular_graphics    'Mercury'
_computing_publication_material  'WinGX and enCIFer'
_refine_special_details          ?
_refine_ls_structure_factor_coef Fsqd
_refine_ls_matrix_type           full
_refine_ls_weighting_scheme      calc
_refine_ls_weighting_details     
'w=1/[\s^2^(Fo^2^)+(0.1185P)^2^] where P=(Fo^2^+2Fc^2^)/3'
_atom_sites_solution_primary     ?
_atom_sites_solution_secondary   ?
_atom_sites_solution_hydrogens   geom
_refine_ls_hydrogen_treatment    constr
_refine_ls_extinction_method     none
_refine_ls_extinction_coef       .
_refine_ls_number_reflns         7180
_refine_ls_number_parameters     379
_refine_ls_number_restraints     0
_refine_ls_R_factor_all          0.1157
_refine_ls_R_factor_gt           0.0788
_refine_ls_wR_factor_ref         0.1991
_refine_ls_wR_factor_gt          0.1860
_refine_ls_goodness_of_fit_ref   1.019
_refine_ls_restrained_S_all      1.019
_refine_ls_shift/su_max          0.001
_refine_ls_shift/su_mean         0.000

loop_
_atom_site_label
_atom_site_type_symbol
_atom_site_fract_x
_atom_site_fract_y
_atom_site_fract_z
_atom_site_U_iso_or_equiv
_atom_site_adp_type
_atom_site_occupancy
_atom_site_site_symmetry_order
_atom_site_calc_flag
_atom_site_refinement_flags_posn
_atom_site_refinement_flags_adp
_atom_site_refinement_flags_occupancy
_atom_site_disorder_assembly
_atom_site_disorder_group
C1 C 0.4361(4) 0.3714(7) 0.6227(3) 0.030(2) Uani 1 1 d . . . . .
C2 C 0.4994(4) 0.3769(8) 0.6397(4) 0.041(2) Uani 1 1 d . . . . .
C3 C 0.5419(5) 0.3034(10) 0.6575(5) 0.061(3) Uani 1 1 d . . . . .
H3 H 0.531784 0.230370 0.660951 0.073 Uiso 1 1 calc R U . . .
C4 C 0.6009(5) 0.3359(13) 0.6709(5) 0.072(4) Uani 1 1 d . . . . .
H4 H 0.628623 0.286903 0.685506 0.087 Uiso 1 1 calc R U . . .
C5 C 0.6165(5) 0.4465(11) 0.6612(4) 0.060(3) Uani 1 1 d . . . . .
H5 H 0.655347 0.467780 0.667619 0.073 Uiso 1 1 calc R U . . .
C6 C 0.5747(4) 0.5229(9) 0.6423(4) 0.043(2) Uani 1 1 d . . . . .
C7 C 0.5840(5) 0.6341(12) 0.6298(4) 0.062(3) Uani 1 1 d . . . . .
H7 H 0.621748 0.661989 0.633990 0.075 Uiso 1 1 calc R U . . .
C8 C 0.5401(5) 0.6981(10) 0.6125(5) 0.059(3) Uani 1 1 d . . . . .
H8 H 0.548404 0.770458 0.605654 0.071 Uiso 1 1 calc R U . . .
C9 C 0.4816(5) 0.6636(8) 0.6036(4) 0.050(3) Uani 1 1 d . . . . .
H9 H 0.451705 0.711313 0.591777 0.060 Uiso 1 1 calc R U . . .
C10 C 0.4709(4) 0.5553(8) 0.6135(3) 0.041(2) Uani 1 1 d . . . . .
C11 C 0.4176(4) 0.4840(7) 0.6079(3) 0.032(2) Uani 1 1 d . . . . .
C12 C 0.5171(4) 0.4870(9) 0.6323(3) 0.040(2) Uani 1 1 d . . . . .
C13 C 0.4221(5) 0.1825(8) 0.6309(4) 0.042(2) Uani 1 1 d . . . . .
C14 C 0.4219(5) 0.1477(11) 0.6792(5) 0.061(3) Uani 1 1 d . . . . .
C15 C 0.4451(7) 0.0432(13) 0.6905(6) 0.088(5) Uani 1 1 d . . . . .
H15 H 0.447722 0.019580 0.722182 0.106 Uiso 1 1 calc R U . . .
C16 C 0.4632(7) -0.0221(12) 0.6597(8) 0.103(6) Uani 1 1 d . . . . .
H16 H 0.477656 -0.090995 0.669063 0.124 Uiso 1 1 calc R U . . .
C17 C 0.4607(6) 0.0120(11) 0.6115(7) 0.090(5) Uani 1 1 d . . . . .
H17 H 0.472805 -0.036368 0.589410 0.108 Uiso 1 1 calc R U . . .
C18 C 0.4407(5) 0.1156(9) 0.5957(5) 0.064(4) Uani 1 1 d . . . . .
C19 C 0.3968(6) 0.2219(13) 0.7160(5) 0.070(4) Uani 1 1 d . . . . .
H19 H 0.380618 0.288504 0.699841 0.084 Uiso 1 1 calc R U . . .
C20 C 0.4440(8) 0.252(2) 0.7546(6) 0.121(7) Uani 1 1 d . . . . .
H20A H 0.474093 0.290335 0.741098 0.181 Uiso 1 1 calc R U . . .
H20B H 0.428766 0.298866 0.777302 0.181 Uiso 1 1 calc R U . . .
H20C H 0.460004 0.187212 0.770572 0.181 Uiso 1 1 calc R U . . .
C21 C 0.3490(9) 0.1616(19) 0.7369(6) 0.128(8) Uani 1 1 d . . . . .
H21A H 0.318496 0.142291 0.711509 0.192 Uiso 1 1 calc R U . . .
H21B H 0.364728 0.096406 0.752769 0.192 Uiso 1 1 calc R U . . .
H21C H 0.333490 0.208060 0.759498 0.192 Uiso 1 1 calc R U . . .
C22 C 0.4355(7) 0.1491(11) 0.5438(6) 0.083(5) Uani 1 1 d . . . . .
H22 H 0.410586 0.214198 0.539549 0.099 Uiso 1 1 calc R U . . .
C23 C 0.4965(9) 0.1823(15) 0.5323(7) 0.123(7) Uani 1 1 d . . . . .
H23A H 0.513525 0.234961 0.555431 0.185 Uiso 1 1 calc R U . . .
H23B H 0.520991 0.118656 0.533516 0.185 Uiso 1 1 calc R U . . .
H23C H 0.492764 0.213822 0.500750 0.185 Uiso 1 1 calc R U . . .
C24 C 0.4122(8) 0.0701(13) 0.5079(6) 0.108(6) Uani 1 1 d . . . . .
H24A H 0.411237 0.101598 0.476535 0.162 Uiso 1 1 calc R U . . .
H24B H 0.436491 0.006088 0.510495 0.162 Uiso 1 1 calc R U . . .
H24C H 0.373420 0.050197 0.512782 0.162 Uiso 1 1 calc R U . . .
C25 C 0.3490(4) 0.6196(7) 0.5818(4) 0.041(2) Uani 1 1 d . . . . .
C26 C 0.3462(5) 0.6536(8) 0.5337(5) 0.052(3) Uani 1 1 d . . . . .
C27 C 0.3318(6) 0.7624(10) 0.5241(5) 0.075(4) Uani 1 1 d . . . . .
H27 H 0.328063 0.788136 0.492666 0.090 Uiso 1 1 calc R U . . .
C28 C 0.3229(9) 0.8339(9) 0.5613(7) 0.095(6) Uani 1 1 d . . . . .
H28 H 0.316144 0.907676 0.554453 0.114 Uiso 1 1 calc R U . . .
C29 C 0.3237(7) 0.7988(10) 0.6064(7) 0.080(5) Uani 1 1 d . . . . .
H29 H 0.315351 0.847107 0.629984 0.096 Uiso 1 1 calc R U . . .
C30 C 0.3372(5) 0.6895(8) 0.6180(5) 0.056(3) Uani 1 1 d . . . . .
C31 C 0.3533(5) 0.5740(9) 0.4948(4) 0.053(3) Uani 1 1 d . . . . .
H31 H 0.341906 0.502759 0.506591 0.063 Uiso 1 1 calc R U . . .
C32 C 0.4141(6) 0.5599(19) 0.4851(6) 0.116(7) Uani 1 1 d . . . . .
H32A H 0.414904 0.507618 0.459708 0.174 Uiso 1 1 calc R U . . .
H32B H 0.428831 0.628905 0.475651 0.174 Uiso 1 1 calc R U . . .
H32C H 0.437999 0.534131 0.513538 0.174 Uiso 1 1 calc R U . . .
C33 C 0.3122(7) 0.5938(13) 0.4478(4) 0.083(4) Uani 1 1 d . . . . .
H33A H 0.273060 0.602764 0.454607 0.125 Uiso 1 1 calc R U . . .
H33B H 0.324065 0.658775 0.432588 0.125 Uiso 1 1 calc R U . . .
H33C H 0.313862 0.532261 0.426818 0.125 Uiso 1 1 calc R U . . .
C34 C 0.3362(6) 0.6487(13) 0.6702(5) 0.076(4) Uani 1 1 d . . . . .
H34 H 0.339988 0.568796 0.670283 0.092 Uiso 1 1 calc R U . . .
C35 C 0.3860(9) 0.6946(17) 0.7045(7) 0.127(8) Uani 1 1 d . . . . .
H35A H 0.422170 0.677317 0.693343 0.190 Uiso 1 1 calc R U . . .
H35B H 0.381969 0.772690 0.706436 0.190 Uiso 1 1 calc R U . . .
H35C H 0.385667 0.663128 0.735742 0.190 Uiso 1 1 calc R U . . .
C36 C 0.2785(8) 0.6775(16) 0.6888(8) 0.122(8) Uani 1 1 d . . . . .
H36A H 0.246316 0.648619 0.667244 0.184 Uiso 1 1 calc R U . . .
H36B H 0.278529 0.646015 0.720107 0.184 Uiso 1 1 calc R U . . .
H36C H 0.274832 0.755578 0.690800 0.184 Uiso 1 1 calc R U . . .
N1 N 0.4014(4) 0.2905(7) 0.6180(3) 0.0365(19) Uani 1 1 d . . . . .
N2 N 0.3645(3) 0.5066(6) 0.5935(3) 0.0379(19) Uani 1 1 d . . . . .
Cl1 Cl 0.28952(13) 0.1158(2) 0.59009(15) 0.0697(10) Uani 1 1 d . . . . .
Cl2 Cl 0.25742(14) 0.3627(3) 0.65275(12) 0.0697(9) Uani 1 1 d . . . . .
Cl3 Cl 0.18341(13) 0.2968(2) 0.53114(12) 0.0585(8) Uani 1 1 d . . . . .
Bi1 Bi 0.29233(2) 0.31468(3) 0.57561(2) 0.03867(19) Uani 1 1 d . . . . .

loop_
_atom_site_aniso_label
_atom_site_aniso_U_11
_atom_site_aniso_U_22
_atom_site_aniso_U_33
_atom_site_aniso_U_23
_atom_site_aniso_U_13
_atom_site_aniso_U_12
C1 0.028(4) 0.038(5) 0.024(5) -0.002(4) 0.006(4) 0.001(4)
C2 0.043(6) 0.043(6) 0.039(6) 0.000(5) 0.014(5) -0.002(5)
C3 0.050(7) 0.069(8) 0.062(8) 0.018(6) 0.002(6) 0.010(6)
C4 0.035(6) 0.114(12) 0.067(9) 0.008(8) 0.004(6) 0.007(7)
C5 0.042(6) 0.078(8) 0.060(8) -0.012(7) 0.002(6) -0.001(6)
C6 0.032(5) 0.062(6) 0.033(5) -0.010(5) 0.000(4) -0.005(5)
C7 0.053(7) 0.086(9) 0.049(7) -0.018(7) 0.011(6) -0.017(7)
C8 0.054(7) 0.064(8) 0.059(8) -0.010(6) 0.005(6) -0.009(6)
C9 0.054(7) 0.038(5) 0.058(7) -0.003(5) 0.004(6) -0.017(5)
C10 0.042(5) 0.046(6) 0.035(5) -0.007(5) 0.004(4) -0.014(5)
C11 0.033(5) 0.035(5) 0.029(5) -0.007(4) 0.010(4) -0.013(4)
C12 0.035(5) 0.055(6) 0.029(5) -0.007(5) 0.001(4) 0.002(4)
C13 0.046(6) 0.037(5) 0.044(6) 0.011(5) 0.015(5) 0.009(4)
C14 0.049(6) 0.068(7) 0.062(8) 0.023(7) -0.003(6) -0.009(6)
C15 0.096(11) 0.069(10) 0.097(12) 0.038(9) 0.001(10) 0.003(8)
C16 0.098(12) 0.045(8) 0.162(19) 0.041(11) 0.000(12) 0.010(8)
C17 0.070(9) 0.052(8) 0.144(16) -0.002(9) 0.000(10) 0.019(7)
C18 0.069(8) 0.032(5) 0.086(10) 0.006(6) -0.008(7) 0.012(5)
C19 0.067(8) 0.094(10) 0.045(7) 0.022(7) -0.004(7) 0.000(7)
C20 0.098(13) 0.20(2) 0.066(11) -0.007(13) 0.013(10) -0.033(14)
C21 0.120(15) 0.20(2) 0.053(10) 0.045(12) -0.015(10) -0.042(15)
C22 0.113(12) 0.052(7) 0.096(12) 0.009(8) 0.059(10) 0.028(8)
C23 0.148(18) 0.138(18) 0.094(14) -0.011(11) 0.051(13) -0.056(13)
C24 0.165(17) 0.075(10) 0.084(11) -0.031(9) 0.019(11) 0.032(11)
C25 0.044(5) 0.030(5) 0.048(6) -0.006(4) 0.000(5) -0.007(4)
C26 0.057(7) 0.027(5) 0.070(8) 0.001(5) 0.000(6) -0.004(5)
C27 0.106(11) 0.037(6) 0.080(10) 0.011(6) 0.011(9) 0.000(7)
C28 0.159(16) 0.018(5) 0.112(14) -0.007(7) 0.035(13) -0.001(7)
C29 0.094(11) 0.042(7) 0.103(13) -0.029(8) 0.011(10) -0.001(7)
C30 0.044(6) 0.040(6) 0.084(9) -0.024(6) 0.013(6) -0.001(5)
C31 0.052(6) 0.042(6) 0.063(7) 0.005(5) 0.006(6) -0.001(5)
C32 0.070(10) 0.20(2) 0.071(10) -0.042(13) 0.004(8) 0.013(11)
C33 0.108(11) 0.098(11) 0.041(7) -0.009(7) 0.001(8) 0.025(9)
C34 0.076(9) 0.085(9) 0.073(10) -0.040(8) 0.026(8) -0.004(8)
C35 0.117(15) 0.18(2) 0.076(12) -0.060(12) -0.009(11) 0.001(13)
C36 0.084(12) 0.16(2) 0.135(18) -0.026(14) 0.063(12) 0.021(11)
N1 0.036(4) 0.042(4) 0.035(4) 0.006(4) 0.018(4) 0.004(4)
N2 0.034(4) 0.025(4) 0.052(5) -0.006(4) -0.002(4) 0.000(3)
Cl1 0.0647(18) 0.0272(13) 0.116(3) 0.0092(15) 0.0082(18) -0.0031(11)
Cl2 0.0628(18) 0.089(2) 0.0596(19) -0.0085(18) 0.0154(16) 0.0065(17)
Cl3 0.0427(15) 0.0664(18) 0.0639(19) -0.0039(15) -0.0007(14) -0.0034(13)
Bi1 0.0412(3) 0.0305(2) 0.0432(3) 0.00010(16) 0.00222(18) -0.00239(15)

_geom_special_details            
;
 All esds (except the esd in the dihedral angle between two l.s. planes)
 are estimated using the full covariance matrix.  The cell esds are taken
 into account individually in the estimation of esds in distances, angles
 and torsion angles; correlations between esds in cell parameters are only
 used when they are defined by crystal symmetry.  An approximate (isotropic)
 treatment of cell esds is used for estimating esds involving l.s. planes.
;

loop_
_geom_bond_atom_site_label_1
_geom_bond_atom_site_label_2
_geom_bond_distance
_geom_bond_site_symmetry_2
_geom_bond_publ_flag
C1 N1 1.269(12) . ?
C1 C2 1.480(13) . ?
C1 C11 1.482(13) . ?
C2 C3 1.373(14) . ?
C2 C12 1.429(14) . ?
C3 C4 1.424(17) . ?
C4 C5 1.434(18) . ?
C5 C6 1.395(15) . ?
C6 C12 1.396(13) . ?
C6 C7 1.426(17) . ?
C7 C8 1.320(17) . ?
C8 C9 1.409(16) . ?
C9 C10 1.381(14) . ?
C10 C12 1.400(14) . ?
C10 C11 1.502(12) . ?
C11 N2 1.269(11) . ?
C13 C18 1.399(17) . ?
C13 C14 1.426(16) . ?
C13 N1 1.432(12) . ?
C14 C15 1.404(18) . ?
C14 C19 1.55(2) . ?
C15 C16 1.29(2) . ?
C16 C17 1.41(2) . ?
C17 C18 1.398(17) . ?
C18 C22 1.506(19) . ?
C19 C20 1.476(19) . ?
C19 C21 1.52(2) . ?
C22 C24 1.44(2) . ?
C22 C23 1.55(2) . ?
C25 C30 1.388(15) . ?
C25 C26 1.407(16) . ?
C25 N2 1.452(11) . ?
C26 C27 1.387(15) . ?
C26 C31 1.491(16) . ?
C27 C28 1.40(2) . ?
C28 C29 1.34(2) . ?
C29 C30 1.399(16) . ?
C30 C34 1.55(2) . ?
C31 C32 1.485(18) . ?
C31 C33 1.536(15) . ?
C34 C35 1.51(2) . ?
C34 C36 1.54(2) . ?
N1 Bi1 2.654(8) . ?
Cl1 Bi1 2.465(3) . ?
Cl2 Bi1 2.493(4) . ?
Cl3 Bi1 2.663(3) . ?

loop_
_geom_angle_atom_site_label_1
_geom_angle_atom_site_label_2
_geom_angle_atom_site_label_3
_geom_angle
_geom_angle_site_symmetry_1
_geom_angle_site_symmetry_3
_geom_angle_publ_flag
N1 C1 C2 130.8(8) . . ?
N1 C1 C11 122.6(8) . . ?
C2 C1 C11 106.4(8) . . ?
C3 C2 C12 117.6(10) . . ?
C3 C2 C1 135.7(10) . . ?
C12 C2 C1 106.7(8) . . ?
C2 C3 C4 121.7(12) . . ?
C3 C4 C5 118.1(12) . . ?
C6 C5 C4 121.5(10) . . ?
C5 C6 C12 117.4(10) . . ?
C5 C6 C7 127.5(10) . . ?
C12 C6 C7 115.1(10) . . ?
C8 C7 C6 121.2(11) . . ?
C7 C8 C9 124.1(12) . . ?
C10 C9 C8 116.5(11) . . ?
C9 C10 C12 119.8(9) . . ?
C9 C10 C11 134.7(10) . . ?
C12 C10 C11 105.5(9) . . ?
N2 C11 C1 121.3(8) . . ?
N2 C11 C10 130.8(9) . . ?
C1 C11 C10 107.9(8) . . ?
C6 C12 C10 123.2(10) . . ?
C6 C12 C2 123.5(9) . . ?
C10 C12 C2 113.4(8) . . ?
C18 C13 C14 123.1(10) . . ?
C18 C13 N1 119.0(9) . . ?
C14 C13 N1 118.0(10) . . ?
C15 C14 C13 115.7(14) . . ?
C15 C14 C19 123.2(13) . . ?
C13 C14 C19 121.0(11) . . ?
C16 C15 C14 123.9(16) . . ?
C15 C16 C17 119.4(14) . . ?
C18 C17 C16 122.7(16) . . ?
C17 C18 C13 115.1(13) . . ?
C17 C18 C22 122.1(14) . . ?
C13 C18 C22 122.6(10) . . ?
C20 C19 C21 110.1(13) . . ?
C20 C19 C14 109.2(13) . . ?
C21 C19 C14 109.8(15) . . ?
C24 C22 C18 117.9(13) . . ?
C24 C22 C23 106.9(15) . . ?
C18 C22 C23 108.9(15) . . ?
C30 C25 C26 122.5(10) . . ?
C30 C25 N2 119.0(10) . . ?
C26 C25 N2 118.4(9) . . ?
C27 C26 C25 116.7(11) . . ?
C27 C26 C31 121.9(11) . . ?
C25 C26 C31 121.2(9) . . ?
C26 C27 C28 120.4(14) . . ?
C29 C28 C27 121.8(12) . . ?
C28 C29 C30 120.1(14) . . ?
C25 C30 C29 118.4(13) . . ?
C25 C30 C34 122.0(10) . . ?
C29 C30 C34 119.6(12) . . ?
C32 C31 C26 114.7(11) . . ?
C32 C31 C33 110.3(12) . . ?
C26 C31 C33 114.3(9) . . ?
C35 C34 C36 108.6(14) . . ?
C35 C34 C30 112.0(14) . . ?
C36 C34 C30 112.3(14) . . ?
C1 N1 C13 120.4(8) . . ?
C1 N1 Bi1 120.6(6) . . ?
C13 N1 Bi1 118.7(6) . . ?
C11 N2 C25 118.4(8) . . ?
Cl1 Bi1 Cl2 93.92(13) . . ?
Cl1 Bi1 N1 82.05(19) . . ?
Cl2 Bi1 N1 92.3(2) . . ?
Cl1 Bi1 Cl3 87.21(10) . . ?
Cl2 Bi1 Cl3 91.46(11) . . ?
N1 Bi1 Cl3 168.8(2) . . ?

_refine_diff_density_max         2.509
_refine_diff_density_min         -1.639
_refine_diff_density_rms         0.254

_shelx_res_file                  
;
TITL shelxt_a.res in I2/a
    shelx.res
    created by SHELXL-2019/3 at 20:11:02 on 04-Mar-2024
CELL  0.71073  23.1761  12.2100  28.1536   90.000   98.169   90.000
ZERR     4.00   0.0116   0.0053   0.0115    0.000    0.041    0.000
LATT   2
SYMM  1/2 - X,   Y, - Z
SFAC  C    H    N    CL   BI
UNIT  288 320 16 24 8
MERG   2
OMIT     0.00 180.00
OMIT     1   1   0
OMIT     0   1   1
OMIT    -2   4   2
OMIT     2   1   1
OMIT     0   1   3
OMIT    -2   1   5
OMIT     2   0   2
OMIT    -2   2   4
ABIN
SHEL  8 0.83
FMAP   2
PLAN   20
SIZE     0.160   0.200   0.300
ACTA
BOND
L.S.   5    0   52
TEMP    20.00
WGHT    0.118500
FVAR       0.08062
C1    1    0.436062    0.371369    0.622662    11.00000    0.02835    0.03786 =
         0.02390   -0.00227    0.00645    0.00121
C2    1    0.499431    0.376879    0.639713    11.00000    0.04305    0.04342 =
         0.03931   -0.00034    0.01443   -0.00228
C3    1    0.541874    0.303371    0.657525    11.00000    0.05007    0.06867 =
         0.06199    0.01817    0.00167    0.01020
AFIX  43
H3    2    0.531784    0.230370    0.660951    11.00000   -1.20000
AFIX   0
C4    1    0.600927    0.335949    0.670890    11.00000    0.03502    0.11435 =
         0.06701    0.00752    0.00384    0.00746
AFIX  43
H4    2    0.628623    0.286903    0.685506    11.00000   -1.20000
AFIX   0
C5    1    0.616490    0.446512    0.661177    11.00000    0.04194    0.07776 =
         0.06010   -0.01243    0.00159   -0.00136
AFIX  43
H5    2    0.655347    0.467780    0.667619    11.00000   -1.20000
AFIX   0
C6    1    0.574677    0.522913    0.642283    11.00000    0.03206    0.06172 =
         0.03346   -0.01032    0.00049   -0.00473
C7    1    0.584030    0.634076    0.629818    11.00000    0.05308    0.08614 =
         0.04923   -0.01817    0.01084   -0.01670
AFIX  43
H7    2    0.621748    0.661989    0.633990    11.00000   -1.20000
AFIX   0
C8    1    0.540149    0.698078    0.612471    11.00000    0.05358    0.06410 =
         0.05946   -0.01040    0.00503   -0.00896
AFIX  43
H8    2    0.548404    0.770458    0.605654    11.00000   -1.20000
AFIX   0
C9    1    0.481594    0.663608    0.603637    11.00000    0.05406    0.03800 =
         0.05765   -0.00280    0.00394   -0.01698
AFIX  43
H9    2    0.451705    0.711313    0.591777    11.00000   -1.20000
AFIX   0
C10   1    0.470878    0.555273    0.613507    11.00000    0.04168    0.04622 =
         0.03467   -0.00691    0.00378   -0.01400
C11   1    0.417551    0.483962    0.607894    11.00000    0.03272    0.03508 =
         0.02897   -0.00678    0.00961   -0.01331
C12   1    0.517057    0.487000    0.632335    11.00000    0.03471    0.05507 =
         0.02863   -0.00715    0.00115    0.00188
C13   1    0.422106    0.182492    0.630893    11.00000    0.04609    0.03658 =
         0.04424    0.01113    0.01463    0.00931
C14   1    0.421872    0.147663    0.679226    11.00000    0.04911    0.06778 =
         0.06233    0.02274   -0.00261   -0.00860
C15   1    0.445131    0.043213    0.690547    11.00000    0.09559    0.06878 =
         0.09681    0.03781    0.00140    0.00277
AFIX  43
H15   2    0.447722    0.019580    0.722182    11.00000   -1.20000
AFIX   0
C16   1    0.463168   -0.022118    0.659653    11.00000    0.09828    0.04478 =
         0.16217    0.04150    0.00046    0.00986
AFIX  43
H16   2    0.477656   -0.090995    0.669063    11.00000   -1.20000
AFIX   0
C17   1    0.460676    0.012029    0.611506    11.00000    0.07013    0.05223 =
         0.14420   -0.00175   -0.00008    0.01928
AFIX  43
H17   2    0.472805   -0.036368    0.589410    11.00000   -1.20000
AFIX   0
C18   1    0.440719    0.115635    0.595686    11.00000    0.06946    0.03223 =
         0.08577    0.00639   -0.00804    0.01179
C19   1    0.396821    0.221946    0.716023    11.00000    0.06716    0.09439 =
         0.04476    0.02158   -0.00413   -0.00010
AFIX  13
H19   2    0.380618    0.288504    0.699841    11.00000   -1.20000
AFIX   0
C20   1    0.444047    0.252236    0.754621    11.00000    0.09783    0.19824 =
         0.06631   -0.00669    0.01255   -0.03263
AFIX  33
H20A  2    0.474093    0.290335    0.741098    11.00000   -1.50000
H20B  2    0.428766    0.298866    0.777302    11.00000   -1.50000
H20C  2    0.460004    0.187212    0.770572    11.00000   -1.50000
AFIX   0
C21   1    0.348997    0.161644    0.736861    11.00000    0.12031    0.20163 =
         0.05339    0.04490   -0.01530   -0.04227
AFIX  33
H21A  2    0.318496    0.142291    0.711509    11.00000   -1.50000
H21B  2    0.364728    0.096406    0.752769    11.00000   -1.50000
H21C  2    0.333490    0.208060    0.759498    11.00000   -1.50000
AFIX   0
C22   1    0.435499    0.149067    0.543755    11.00000    0.11293    0.05217 =
         0.09610    0.00918    0.05861    0.02832
AFIX  13
H22   2    0.410586    0.214198    0.539549    11.00000   -1.20000
AFIX   0
C23   1    0.496487    0.182281    0.532272    11.00000    0.14758    0.13780 =
         0.09386   -0.01087    0.05134   -0.05649
AFIX  33
H23A  2    0.513525    0.234961    0.555431    11.00000   -1.50000
H23B  2    0.520991    0.118656    0.533516    11.00000   -1.50000
H23C  2    0.492764    0.213822    0.500750    11.00000   -1.50000
AFIX   0
C24   1    0.412210    0.070121    0.507886    11.00000    0.16505    0.07483 =
         0.08400   -0.03079    0.01946    0.03224
AFIX  33
H24A  2    0.411237    0.101598    0.476535    11.00000   -1.50000
H24B  2    0.436491    0.006088    0.510495    11.00000   -1.50000
H24C  2    0.373420    0.050197    0.512782    11.00000   -1.50000
AFIX   0
C25   1    0.349044    0.619609    0.581759    11.00000    0.04426    0.02951 =
         0.04838   -0.00643   -0.00012   -0.00683
C26   1    0.346192    0.653648    0.533738    11.00000    0.05725    0.02684 =
         0.06979    0.00104    0.00013   -0.00436
C27   1    0.331799    0.762445    0.524051    11.00000    0.10639    0.03716 =
         0.07992    0.01060    0.01119   -0.00041
AFIX  43
H27   2    0.328063    0.788136    0.492666    11.00000   -1.20000
AFIX   0
C28   1    0.322857    0.833867    0.561287    11.00000    0.15875    0.01784 =
         0.11188   -0.00687    0.03455   -0.00067
AFIX  43
H28   2    0.316144    0.907676    0.554453    11.00000   -1.20000
AFIX   0
C29   1    0.323714    0.798791    0.606352    11.00000    0.09408    0.04221 =
         0.10283   -0.02858    0.01082   -0.00097
AFIX  43
H29   2    0.315351    0.847107    0.629984    11.00000   -1.20000
AFIX   0
C30   1    0.337173    0.689511    0.618017    11.00000    0.04411    0.03985 =
         0.08423   -0.02429    0.01329   -0.00058
C31   1    0.353270    0.573998    0.494830    11.00000    0.05196    0.04248 =
         0.06264    0.00460    0.00608   -0.00090
AFIX  13
H31   2    0.341906    0.502759    0.506591    11.00000   -1.20000
AFIX   0
C32   1    0.414128    0.559919    0.485069    11.00000    0.07036    0.20435 =
         0.07082   -0.04152    0.00439    0.01264
AFIX  33
H32A  2    0.414904    0.507618    0.459708    11.00000   -1.50000
H32B  2    0.428831    0.628905    0.475651    11.00000   -1.50000
H32C  2    0.437999    0.534131    0.513538    11.00000   -1.50000
AFIX   0
C33   1    0.312217    0.593806    0.447803    11.00000    0.10800    0.09778 =
         0.04142   -0.00929    0.00094    0.02488
AFIX  33
H33A  2    0.273060    0.602764    0.454607    11.00000   -1.50000
H33B  2    0.324065    0.658775    0.432588    11.00000   -1.50000
H33C  2    0.313862    0.532261    0.426818    11.00000   -1.50000
AFIX   0
C34   1    0.336152    0.648729    0.670192    11.00000    0.07559    0.08527 =
         0.07282   -0.04029    0.02559   -0.00366
AFIX  13
H34   2    0.339988    0.568796    0.670283    11.00000   -1.20000
AFIX   0
C35   1    0.386005    0.694623    0.704540    11.00000    0.11669    0.18026 =
         0.07640   -0.06031   -0.00869    0.00101
AFIX  33
H35A  2    0.422170    0.677317    0.693343    11.00000   -1.50000
H35B  2    0.381969    0.772690    0.706436    11.00000   -1.50000
H35C  2    0.385667    0.663128    0.735742    11.00000   -1.50000
AFIX   0
C36   1    0.278508    0.677450    0.688850    11.00000    0.08411    0.16220 =
         0.13451   -0.02608    0.06312    0.02059
AFIX  33
H36A  2    0.246316    0.648619    0.667244    11.00000   -1.50000
H36B  2    0.278529    0.646015    0.720107    11.00000   -1.50000
H36C  2    0.274832    0.755578    0.690800    11.00000   -1.50000
AFIX   0
N1    3    0.401362    0.290473    0.618023    11.00000    0.03556    0.04240 =
         0.03535    0.00574    0.01826    0.00423
N2    3    0.364493    0.506552    0.593492    11.00000    0.03413    0.02491 =
         0.05219   -0.00587   -0.00209   -0.00010
CL1   4    0.289525    0.115770    0.590092    11.00000    0.06474    0.02718 =
         0.11584    0.00915    0.00821   -0.00311
CL2   4    0.257416    0.362740    0.652750    11.00000    0.06279    0.08878 =
         0.05956   -0.00849    0.01538    0.00652
CL3   4    0.183408    0.296784    0.531139    11.00000    0.04274    0.06635 =
         0.06386   -0.00391   -0.00067   -0.00340
BI1   5    0.292332    0.314676    0.575606    11.00000    0.04123    0.03054 =
         0.04316    0.00010    0.00222   -0.00239
HKLF    4


REM  shelxt_a.res in I2/a
REM wR2 = 0.1991, GooF = S = 1.019, Restrained GooF = 1.019 for all data
REM R1 = 0.0788 for 4937 Fo > 4sig(Fo) and 0.1157 for all 7180 data
REM 379 parameters refined using 0 restraints

END

WGHT      0.1189      0.0000

REM Highest difference peak  2.509,  deepest hole -1.639,  1-sigma level  0.254
Q1    1   0.2614  0.3152  0.5531  11.00000  0.05    2.51
Q2    1   0.3238  0.3089  0.5959  11.00000  0.05    2.16
Q3    1   0.2925  0.3109  0.6083  11.00000  0.05    1.55
Q4    1   0.2089  0.2959  0.5459  11.00000  0.05    1.30
Q5    1   0.2909  0.0680  0.6018  11.00000  0.05    1.10
Q6    1   0.3457  0.3158  0.5544  11.00000  0.05    1.05
Q7    1   0.3367  0.0689  0.4806  11.00000  0.05    0.96
Q8    1   0.2295  0.3215  0.5914  11.00000  0.05    0.94
Q9    1   0.3698  0.2937  0.6096  11.00000  0.05    0.92
Q10   1   0.3009  0.1137  0.5509  11.00000  0.05    0.88
Q11   1   0.1763  0.2834  0.4907  11.00000  0.05    0.88
Q12   1   0.2607  0.2951  0.7100  11.00000  0.05    0.86
Q13   1   0.4030  0.2953  0.7289  11.00000  0.05    0.85
Q14   1   0.1664  0.3063  0.5014  11.00000  0.05    0.84
Q15   1   0.6278  0.3163  0.7085  11.00000  0.05    0.82
Q16   1   0.2107  0.3675  0.6316  11.00000  0.05    0.77
Q17   1   0.3166  0.8060  0.5510  11.00000  0.05    0.75
Q18   1   0.4349  0.6877  0.4449  11.00000  0.05    0.75
Q19   1   0.2856  0.1613  0.5991  11.00000  0.05    0.75
Q20   1   0.5168  0.7038  0.6045  11.00000  0.05    0.74
;
_shelx_res_checksum              32169

_shelx_hkl_file                  
;
  -1   1   0    1.50    4.10
   2  -2   0 1209.28  203.08
   2  -2   0 1483.25  203.08
  -2   2   0 1475.15  203.18
  -2   2   0 1481.45  203.08
   3  -3   0    6.50   12.00
   3  -3   0    5.10    1.60
  -3   3   0  -10.10   10.90
  -3   3   0    7.30    2.20
   4  -4   0  133.09   18.90
   4  -4   0  115.49   19.00
  -4   4   0  138.69   19.00
   5  -5   0  294.77   40.70
   5  -5   0  265.47   40.50
   6  -6   0    4.20    2.10
   6  -6   0    0.20    2.90
   6  -6   0  -13.60   24.00
   6  -6   0   -6.70    3.80
  -6   6   0    3.60    4.10
  -6   6   0    5.50   21.60
   7  -7   0   53.69    9.40
   7  -7   0   53.29    8.60
  -7   7   0   58.89    9.70
  -7   7   0    8.30   29.10
  -7   7   0   48.00    7.70
   8  -8   0  273.67   39.30
   8  -8   0  272.27   38.80
  -8   8   0  262.47   39.10
  -8   8   0  253.67   38.20
   9  -9   0  197.98   28.00
  -9   9   0  165.78   25.30
  10 -10   0  153.38   28.00
  10 -10   0  164.78   25.60
  10 -10   0  166.98   26.30
 -10  10   0  182.78   25.20
 -10  10   0  186.48   27.70
 -10  10   0  125.39   46.90
  11 -11   0   46.40   14.80
  11 -11   0   41.30    7.10
  11 -11   0   34.90    9.70
  11 -11   0   46.00    9.50
 -11  11   0   43.10   47.10
 -11  11   0   36.80    7.30
 -11  11   0   54.09   13.70
  12 -12   0   -4.90    7.70
  12 -12   0    1.70    8.60
  12 -12   0    2.50   16.80
 -12  12   0  -38.60   55.19
 -12  12   0    9.10    5.60
  13 -13   0   37.00   23.20
 -13  13   0  130.29   81.89
 -13  13   0   46.10   10.10
  14 -14   0   29.50   28.40
 -14  14   0   43.70   10.90
  15 -15   0   43.90   35.10
  14 -15  -1  -23.00   29.00
 -13  14   1    0.10  122.49
 -13  14   1   13.70    8.10
  13 -14  -1   51.79   26.90
 -12  13   1   63.69   72.79
 -12  13   1   72.49   12.00
  12 -13  -1   53.19   14.80
  12 -13  -1   20.00   21.40
  12 -13  -1   86.29   14.70
 -11  12   1   10.90   57.99
 -11  12   1  104.89   15.70
  11 -12  -1  128.39   22.00
  11 -12  -1   97.49   17.50
  11 -12  -1   83.69   15.10
 -10  11   1  108.69   17.90
 -10  11   1   90.19   13.70
 -10  11   1  127.09   48.00
  10 -11  -1   76.59   14.50
  10 -11  -1   75.09   15.40
  10 -11  -1  100.29   18.10
  -9  10   1   25.70    5.50
  -9  10   1   28.30   36.70
  -9  10   1   27.70   10.10
  -9  10   1    7.10   42.40
   9 -10  -1   26.20    4.80
   9 -10  -1   37.20   11.20
  -8   9   1   12.60    2.80
  -8   9   1   -8.70   29.40
  -8   9   1   -5.60    7.60
  -8   9   1    1.40   39.60
   8  -9  -1    4.70    2.30
   8  -9  -1    9.80    5.60
   8  -9  -1   -3.10    3.80
   8  -9  -1    8.60    7.30
  -7   8   1   14.30    3.80
  -7   8   1   10.70   22.60
  -7   8   1   34.20    7.10
  -7   8   1  -21.30   30.10
   7  -8  -1   23.50    3.50
   7  -8  -1   35.90    7.50
  -6   7   1   15.00    3.00
  -6   7   1   17.10    5.40
  -6   7   1   10.90   27.50
   6  -7  -1   16.10    2.90
   6  -7  -1   26.00    5.00
   6  -7  -1   16.20    5.50
  -5   6   1   68.19   11.20
   5  -6  -1   65.49   10.90
   5  -6  -1   62.99   11.20
   5  -6  -1   72.99   10.10
  -4   5   1  708.43   99.09
   4  -5  -1  669.13   99.09
  -3   4   1 1816.92  233.98
  -3   4   1 1642.64  234.08
   3  -4  -1 1435.46  234.08
   3  -4  -1 1611.34  234.18
  -2   3   1 2911.81  439.36
  -2   3   1 3199.38  439.26
   1  -2  -1  131.89   19.20
   1  -2  -1  135.09   19.20
   2  -1   1   14.70    2.20
  -2   1  -1    3.80    5.40
   3  -2   1 1292.07  167.68
  -3   2  -1 1039.30  167.68
   4  -3   1   54.49    7.90
   4  -3   1   44.80    7.70
  -4   3  -1   54.99    7.50
  -4   3  -1   47.80    7.80
   5  -4   1  163.98   25.30
   5  -4   1  193.58   25.40
  -5   4  -1  152.28   25.40
  -5   4  -1  187.08   25.40
   6  -5   1  131.59   19.60
   6  -5   1  123.29   19.80
  -6   5  -1  158.98   19.90
  -6   5  -1  120.09   19.80
   7  -6   1  437.66   69.49
   7  -6   1  495.55   69.69
  -7   6  -1  467.25   69.69
  -7   6  -1  526.15   69.69
   8  -7   1  224.18   36.70
   8  -7   1  257.27   36.30
  -8   7  -1  253.77   35.80
   9  -8   1  -41.10   34.30
   9  -8   1   21.30    3.90
   9  -8   1   31.50    7.90
   9  -8   1   28.30    5.80
  -9   8  -1   35.00   38.00
  -9   8  -1   18.20    4.00
  -9   8  -1   26.90    7.30
  10  -9   1  134.39   19.80
  10  -9   1   40.70   46.40
  10  -9   1  152.78   22.80
  10  -9   1  112.89   20.70
 -10   9  -1  146.39   19.80
  11 -10   1  302.97   41.90
  11 -10   1  235.98   39.30
  11 -10   1  279.87   38.50
 -11  10  -1  261.47   38.60
 -11  10  -1  261.07   41.10
  12 -11   1  169.08   24.60
  12 -11   1  157.98   26.20
  12 -11   1  170.68   29.70
 -12  11  -1  174.78   24.90
 -12  11  -1  142.09   28.70
 -12  11  -1  169.28   62.49
  13 -12   1   55.09   21.20
  13 -12   1   47.50   12.30
  13 -12   1   71.59   12.40
 -13  12  -1   42.70    9.40
 -13  12  -1   62.69   63.99
  14 -13   1   -8.60   21.90
 -14  13  -1    0.50    6.80
 -14  13  -1  -16.30   85.59
  15 -14   1   31.80   32.20
  16 -15   1   29.30   39.10
 -13  15   2   28.90   11.70
  13 -15  -2   35.30   60.59
 -12  14   2   17.80   13.00
 -12  14   2   44.40  109.19
  12 -14  -2   36.20   23.10
 -11  13   2   12.50    6.30
 -11  13   2  -33.20   66.29
  11 -13  -2    7.80    8.50
  11 -13  -2   13.00   10.70
  11 -13  -2    5.50   17.90
 -10  12   2   -7.50   13.20
 -10  12   2    5.70    4.40
 -10  12   2   72.49   53.69
  10 -12  -2  -12.00   15.50
  10 -12  -2   14.10    4.10
  10 -12  -2    1.00    6.50
  -9  11   2    1.20   10.00
  -9  11   2    3.90    3.60
  -9  11   2 -118.89   55.69
  -9  11   2  -12.10   38.50
   9 -11  -2    3.70    6.10
   9 -11  -2    0.40    3.20
   9 -11  -2   13.70   18.90
   9 -11  -2   -0.40    6.90
  -8  10   2   12.40   34.60
  -8  10   2   -0.90   44.90
  -8  10   2   54.59   11.10
   8 -10  -2   34.50    6.20
   8 -10  -2   35.80   10.80
   8 -10  -2   50.49    9.40
  -7   9   2   75.79   12.70
  -7   9   2   74.49   14.80
  -7   9   2  103.79   31.40
   7  -9  -2   85.19   12.40
   7  -9  -2   95.59   12.90
   7  -9  -2   79.49   14.60
  -6   8   2  260.97   41.10
   6  -8  -2  188.98   30.00
   6  -8  -2  220.28   29.30
   6  -8  -2  176.08   30.30
  -5   7   2  226.08   44.20
   5  -7  -2  276.57   38.00
   5  -7  -2  254.27   37.50
  -4   6   2  691.03   98.99
   4  -6  -2  657.23   96.49
   4  -6  -2  662.73   96.09
  -3   5   2   76.29   18.20
   3  -5  -2   84.09   13.70
   3  -5  -2  101.29   13.90
   3  -5  -2  113.59   14.60
  -2   4   2   34.10    5.10
  -2   4   2   35.60    8.60
  -2   4   2    2.80   14.80
  -2   4   2   25.60    4.20
   2  -4  -2   33.30    5.50
   2  -4  -2   26.30    4.10
   2  -4  -2   33.30    4.90
  -1   3   2  145.29   22.00
  -1   3   2  169.48   23.40
   1  -3  -2  148.69   23.40
   1  -3  -2  154.18   22.00
   0  -2  -2  441.36   70.89
   0  -2  -2  532.05   70.39
   1   1   2    0.40    0.30
   1   1   2    0.00    0.40
  -1  -1  -2   -0.50    1.60
  -2   0  -2   15.90    2.30
  -3   1  -2   77.09   11.50
  -3   1  -2   79.49   11.30
   4  -2   2  475.15   62.09
  -4   2  -2  381.56   62.09
  -4   2  -2  434.86   62.09
   5  -3   2    1.50   12.00
   5  -3   2   12.80    3.10
   5  -3   2    8.00    2.80
   5  -3   2   11.30    2.20
  -5   3  -2   14.10    2.90
  -5   3  -2   12.00    2.90
  -5   3  -2   16.60    2.30
  -5   3  -2   -2.20   14.30
   6  -4   2  163.28   26.90
   6  -4   2  193.48   27.10
  -6   4  -2  178.88   27.00
  -6   4  -2  192.48   26.70
  -6   4  -2  193.68   26.90
   7  -5   2  671.83   99.39
  -7   5  -2  668.73   98.99
  -7   5  -2  724.83   99.39
   8  -6   2  328.77   54.69
  -8   6  -2  380.36   54.09
  -8   6  -2  413.56   54.69
   9  -7   2  554.34   86.19
   9  -7   2  567.64   86.49
  -9   7  -2  625.74   85.89
  -9   7  -2  636.44   86.49
  10  -8   2  285.07   46.00
 -10   8  -2  350.86   46.60
 -10   8  -2  316.27   45.50
  11  -9   2  144.89   22.60
  11  -9   2  129.89   20.10
  11  -9   2  120.49   19.30
  12 -10   2   50.59   13.30
  12 -10   2   24.40    5.40
  12 -10   2   54.09   58.69
  12 -10   2   27.90    8.10
 -12  10  -2   26.80   18.80
 -12  10  -2  -69.99   51.89
  13 -11   2   -0.10    3.90
  13 -11   2   21.50   16.60
  13 -11   2   -7.20    8.10
 -13  11  -2   10.60    5.20
 -13  11  -2   -3.70   13.10
  14 -12   2   -5.50    9.10
  14 -12   2   -9.70   20.60
 -14  12  -2   -3.10    5.80
 -14  12  -2  -16.60   71.49
  15 -13   2   10.90   25.10
 -15  13  -2  -10.70    7.10
  16 -14   2   43.00   32.80
 -16  14  -2   -1.50   15.30
 -12  15   3   -5.60    9.00
  12 -15  -3   10.30   29.40
 -11  14   3  -17.10    8.40
  11 -14  -3    5.60   13.40
  11 -14  -3  -24.80   22.00
 -10  13   3    0.70    5.40
 -10  13   3    2.60   59.59
  10 -13  -3   -1.90    8.20
  10 -13  -3    3.40   10.70
  10 -13  -3   -9.60   18.90
  -9  12   3  111.59   51.49
  -9  12   3   94.89   16.70
   9 -12  -3   58.69   11.10
   9 -12  -3   71.79   13.90
  -8  11   3  164.88   26.30
  -8  11   3  174.48   48.00
   8 -11  -3  164.18   23.40
   8 -11  -3  122.29   25.90
   8 -11  -3  173.78   25.30
  -7  10   3  317.17   48.00
  -7  10   3  329.97   46.80
  -7  10   3  337.77   61.99
   7 -10  -3  314.67   47.90
   6  -9  -3  356.36   51.39
  -5   8   3    6.90   34.10
  -5   8   3   14.50    3.30
  -5   8   3   41.30   19.80
   5  -8  -3   26.70    6.20
   5  -8  -3   18.10    6.10
  -4   7   3   66.09   12.10
  -4   7   3   72.19   10.70
  -4   7   3   85.89   20.40
   4  -7  -3   70.59   10.50
   4  -7  -3   73.69   10.80
   4  -7  -3   71.69   12.10
  -3   6   3 1018.70  144.79
   3  -6  -3  993.30  145.19
  -2   5   3  767.12  109.49
  -2   5   3  698.03  107.99
  -2   5   3  718.43  107.69
   2  -5  -3  814.42  107.69
  -1   4   3  747.03  108.29
  -1   4   3  708.93  107.09
  -1   4   3  721.93  107.19
   1  -4  -3  689.83  107.09
   1  -4  -3  880.31  108.59
   0   3   3  334.37   52.39
   0   3   3  357.36   51.49
   0  -3  -3  386.46   51.49
   0  -3  -3  402.16   52.59
   0  -3  -3  317.07   51.49
  -1  -2  -3   39.90    7.50
  -1  -2  -3   46.40    6.30
  -1  -2  -3   39.10    6.20
   2   1   3    3.60    2.40
   2   1   3    1.00    0.90
  -2  -1  -3    0.10    0.90
  -2  -1  -3   -3.20    2.60
  -2  -1  -3    2.10    1.00
   3   0   3   -6.50    3.70
   3   0   3   -0.20    1.00
   3   0   3    3.30    5.10
   3   0   3    1.00    0.60
  -3   0  -3   -6.00    4.00
  -3   0  -3    2.50    3.30
  -3   0  -3    0.10    1.00
   4  -1   3  352.56   51.19
  -4   1  -3  360.26   51.19
  -4   1  -3  351.86   51.09
   5  -2   3  829.72  125.69
  -5   2  -3  919.41  125.79
   6  -3   3 1115.09  176.98
  -6   3  -3 1298.97  176.88
  -6   3  -3 1273.77  176.98
   8  -5   3 1616.04  224.78
   8  -5   3 1427.76  224.98
  -8   5  -3 1650.83  224.78
  -8   5  -3 1550.94  224.98
   9  -6   3  253.57   31.70
  -9   6  -3  196.18   31.90
  -9   6  -3  200.58   31.30
  -9   6  -3  214.78   32.00
  10  -7   3   25.30    7.80
  10  -7   3   35.90    6.40
  10  -7   3    4.70   30.50
 -10   7  -3   23.30    4.60
 -10   7  -3   18.40    8.00
 -10   7  -3  -21.40   32.30
 -10   7  -3   38.80    7.40
  11  -8   3    2.30   41.60
  11  -8   3    8.20    8.50
 -11   8  -3    9.20   34.60
 -11   8  -3   11.40    7.40
 -11   8  -3   11.80    8.90
  12  -9   3    5.00   10.00
  12  -9   3    5.50    4.50
  12  -9   3  -49.99   70.79
 -12   9  -3   -5.00    8.80
 -12   9  -3    6.60   41.90
  13 -10   3    5.70    4.00
  13 -10   3    8.30    6.30
  13 -10   3    1.70   14.30
 -13  10  -3   12.00    4.30
 -13  10  -3    0.40   11.10
  14 -11   3   12.60   16.70
  14 -11   3   27.90    8.40
 -14  11  -3   16.90    5.90
  15 -12   3   29.20   20.70
 -15  12  -3   27.10    7.60
  16 -13   3   21.50   25.00
 -16  13  -3   46.60   10.60
  17 -14   3   38.40   33.70
 -11  15   4    4.60    9.50
  11 -15  -4   -4.50   24.70
 -10  14   4   35.10    9.00
 -10  14   4   48.80   76.99
  10 -14  -4   19.60   14.30
  10 -14  -4   37.10   20.30
  -9  13   4   40.90    8.30
  -9  13   4   87.89   61.99
   9 -13  -4   31.20   13.10
   9 -13  -4   32.50   17.40
   9 -13  -4   48.90   10.40
  -8  12   4    5.90   46.80
  -8  12   4   11.20   10.00
  -8  12   4   11.80    4.30
   8 -12  -4   -2.30    6.00
   8 -12  -4   -0.60    3.40
   8 -12  -4   13.70   12.00
   8 -12  -4   -6.80    9.60
  -7  11   4   96.09   38.50
  -7  11   4   -7.90   47.70
  -7  11   4   39.20    9.80
   7 -11  -4   22.30   11.40
   7 -11  -4   17.50    3.70
   7 -11  -4   17.00    8.50
   7 -11  -4    4.00    5.00
  -6  10   4  181.28   37.60
  -6  10   4  -58.29   90.09
   6 -10  -4  137.79   20.50
   6 -10  -4  142.29   21.00
  -5   9   4  290.07   52.09
   5  -9  -4  292.57   42.20
  -4   8   4  271.07   41.30
  -4   8   4  313.17   48.60
   4  -8  -4  279.37   42.00
   4  -8  -4  299.17   41.40
  -3   7   4  176.68   24.10
  -3   7   4  162.28   30.20
   3  -7  -4  160.28   23.30
   3  -7  -4  147.79   24.00
  -2   6   4  196.58   30.90
  -2   6   4  196.58   31.30
   2  -6  -4  230.78   31.40
   2  -6  -4  233.28   30.90
  -1   5   4   64.29   10.60
  -1   5   4   74.09   14.40
  -1   5   4   63.99   10.10
   1  -5  -4   74.89   10.10
   1  -5  -4   79.69   14.50
   0   4   4  129.59   17.30
   0   4   4  133.79   19.40
   0  -4  -4  109.59   19.50
   0  -4  -4  113.19   17.00
   0  -4  -4  107.49   17.30
   1   3   4   56.89    8.40
   1   3   4   58.49    8.20
  -1  -3  -4   50.19    8.40
  -1  -3  -4   64.39   10.60
   2   2   4  253.87   37.00
   2   2   4  245.98   37.70
  -2  -2  -4  271.67   37.80
   3   1   4 1008.10  139.69
  -3  -1  -4  996.80  140.29
  -3  -1  -4  909.61  139.69
   4   0   4 4259.47  583.94
  -4   0  -4 3856.11  583.84
  -5   1  -4 2354.76  339.47
   6  -2   4  987.40  139.69
  -6   2  -4  952.60  139.69
   7  -3   4   28.80    4.80
   7  -3   4   28.70    5.70
  -7   3  -4   22.90    5.40
  -7   3  -4   29.00   20.60
  -7   3  -4   34.60    5.60
  -7   3  -4   37.70    5.00
   8  -4   4   -0.40   18.50
   8  -4   4    1.50    1.50
   8  -4   4    3.50    3.70
  -8   4  -4  -27.40   26.70
  -8   4  -4    3.00    1.50
  -8   4  -4    4.60    3.50
  -8   4  -4   -2.00    3.40
   9  -5   4   57.29    8.60
   9  -5   4   41.70    9.70
  -9   5  -4   49.20    9.60
  -9   5  -4   23.90   24.90
  -9   5  -4   63.49    9.80
  -9   5  -4   62.89    8.60
  10  -6   4   37.10    5.10
  10  -6   4   -5.10   27.60
  10  -6   4   23.20    7.00
 -10   6  -4   27.30    7.00
 -10   6  -4   27.60    5.00
 -10   6  -4   17.80    6.60
 -10   6  -4   13.50   25.40
  11  -7   4   10.80   32.10
  11  -7   4   -4.20    6.80
  11  -7   4    4.70    3.20
 -11   7  -4    7.80    7.20
 -11   7  -4   -1.90    2.40
 -11   7  -4    3.40    6.30
 -11   7  -4   26.40   33.70
  12  -8   4   92.69   14.30
  12  -8   4  -18.10   55.69
  12  -8   4  113.89   17.80
 -12   8  -4  116.59   17.00
 -12   8  -4   85.59   14.10
 -12   8  -4   87.29   16.90
  13  -9   4   77.69   18.20
  13  -9   4   30.60   52.59
 -13   9  -4   83.19   14.80
 -13   9  -4   66.39   11.20
 -13   9  -4   60.59   49.20
  14 -10   4  100.49   13.00
  14 -10   4   81.09   20.40
 -14  10  -4   68.59   17.10
 -14  10  -4   70.09   13.40
  15 -11   4   26.20   18.10
  15 -11   4   15.20    8.70
 -15  11  -4   18.00    6.40
  16 -12   4    1.30   24.30
 -16  12  -4    3.20    6.80
  17 -13   4    1.50   49.70
 -17  13  -4   -3.50    9.10
  18 -14   4   61.69   34.60
 -10  15   5  103.79   87.49
 -10  15   5   -6.70    9.00
  10 -15  -5   15.80   26.30
  -9  14   5   11.00   70.99
  -9  14   5   29.90    8.90
   9 -14  -5   10.50   20.90
   9 -14  -5   44.10   15.00
  -8  13   5   72.59   13.00
  -8  13   5  174.98   57.49
   8 -13  -5   74.19   16.90
   8 -13  -5   65.39   18.90
  -7  12   5  144.49   49.20
  -7  12   5  131.09   22.40
  -7  12   5  158.98   25.50
   7 -12  -5  115.19   25.30
   7 -12  -5  149.88   26.20
   7 -12  -5  171.78   21.90
  -6  11   5  188.88   46.20
  -6  11   5   71.69   61.29
  -6  11   5  202.08   29.50
   6 -11  -5  191.28   27.30
   6 -11  -5  170.38   30.60
  -5  10   5  102.99   17.30
  -5  10   5  121.19   19.50
   5 -10  -5  137.29   19.60
   5 -10  -5   98.59   17.40
   5 -10  -5  130.09   16.90
  -4   9   5  -24.00   40.40
  -4   9   5   19.50   21.00
  -4   9   5   20.20    4.00
   4  -9  -5   10.80    6.70
   4  -9  -5   17.60    7.50
  -3   8   5   19.80   16.60
  -3   8   5   -2.90   35.40
  -3   8   5   -2.30    2.10
   3  -8  -5    0.10    2.40
   3  -8  -5   -4.30    5.20
   3  -8  -5   -2.50    1.30
   3  -8  -5   -2.90    6.00
  -2   7   5   41.80    6.80
  -2   7   5   62.99   15.60
   2  -7  -5   60.19    9.90
  -1   6   5  375.26   49.99
   1  -6  -5  319.77   49.99
   1  -6  -5  346.87   50.09
   1  -6  -5  349.77   53.39
   0   5   5 1156.88  175.28
   0   5   5 1217.58  173.88
   0   5   5 1248.48  174.08
   1   4   5  828.22  125.49
  -1  -4  -5  902.51  125.69
   2   3   5  344.37   49.70
  -2  -3  -5  340.67   48.70
  -2  -3  -5  326.87   49.80
   3   2   5  174.18   26.20
   3   2   5  200.98   27.30
  -3  -2  -5  209.68   27.80
  -3  -2  -5  160.08   26.10
   4   1   5    7.90    2.00
   4   1   5   11.10    2.10
   4   1   5    7.90    4.90
  -4  -1  -5   18.10    5.20
  -4  -1  -5    4.80    1.90
  -4  -1  -5    6.30    1.80
   5   0   5    0.60    0.90
   5   0   5   -0.80    7.80
   5   0   5   -1.10    1.40
   5   0   5   -5.90    5.80
  -5   0  -5   -1.80    1.50
  -5   0  -5   -4.10    5.00
  -5   0  -5   -0.70    1.30
   6  -1   5   47.10    6.40
  -6   1  -5   37.20    6.00
   7  -2   5  539.95   87.39
   7  -2   5  650.43   87.29
  -7   2  -5  577.04   87.29
  -7   2  -5  657.93   87.49
   8  -3   5  173.68   23.80
  -8   3  -5  151.68   23.40
   9  -4   5    4.60   19.20
   9  -4   5   13.80    4.10
   9  -4   5    2.00    1.70
  -9   4  -5    9.30    4.10
  -9   4  -5    2.00    2.00
  -9   4  -5   -0.10   22.80
  -9   4  -5    4.40    4.30
  -9   4  -5   -4.40   17.20
  10  -5   5   17.60    5.60
  10  -5   5   -4.20   26.00
 -10   5  -5   18.90   21.90
 -10   5  -5   20.10    5.60
  11  -6   5   50.09   10.60
  11  -6   5  -14.50   33.30
 -11   6  -5   62.39    9.00
 -11   6  -5    1.10   26.70
 -11   6  -5   63.09   11.10
  12  -7   5   11.10    7.30
  12  -7   5  -54.79   37.00
  12  -7   5    2.10    3.30
 -12   7  -5    8.90    7.00
 -12   7  -5    3.70    7.50
 -12   7  -5   26.30   34.20
 -12   7  -5    5.50    2.90
  13  -8   5  -34.20   48.70
  13  -8   5   16.20    9.40
 -13   8  -5  -13.60   43.10
 -13   8  -5   -0.40    8.20
  14  -9   5   97.59   16.40
  14  -9   5   10.50   56.09
  14  -9   5   69.09   11.10
 -14   9  -5   63.09   16.30
 -14   9  -5   72.29   48.30
 -14   9  -5   56.19   10.80
  15 -10   5  135.19   25.50
 -15  10  -5  124.69   24.40
 -15  10  -5  129.49   20.10
  16 -11   5  142.79   26.50
 -16  11  -5   85.29   16.10
  17 -12   5   61.29   25.70
  18 -13   5   68.79   31.80
 -18  13  -5  -11.80   17.00
  -9  15   6   59.99   11.60
  -9  15   6   36.10   88.49
   9 -15  -6   31.40   17.00
   9 -15  -6   66.09   26.40
  -8  14   6   49.99   10.50
  -8  14   6   35.90   68.39
   8 -14  -6   48.50   15.10
   8 -14  -6   35.90   19.30
  -7  13   6    8.80    5.90
  -7  13   6   36.10   47.10
   7 -13  -6   40.90   16.40
   7 -13  -6    4.50    7.00
   7 -13  -6   10.30   11.60
  -6  12   6   13.20   38.80
  -6  12   6   -0.20    4.80
  -6  12   6    3.20   10.30
   6 -12  -6    1.30    4.40
   6 -12  -6    2.40    2.90
   6 -12  -6   -0.70   11.20
   6 -12  -6  -11.20   10.00
  -5  11   6   23.60   31.30
  -5  11   6   26.00    5.90
  -5  11   6   37.00    9.80
  -5  11   6   39.40   68.59
   5 -11  -6   12.70    9.90
   5 -11  -6   27.70    4.70
   5 -11  -6   31.80   10.60
  -4  10   6    5.70    6.80
  -4  10   6   33.60   23.80
  -4  10   6    9.30   49.40
  -4  10   6   13.60    4.00
   4 -10  -6   25.70    8.40
   4 -10  -6   10.50    3.30
   4 -10  -6    7.10    2.50
   4 -10  -6    9.60    8.50
  -3   9   6  103.49   27.50
  -3   9   6  125.49   17.90
   3  -9  -6   95.49   18.20
   3  -9  -6  114.59   16.70
  -2   8   6  290.37   43.20
  -2   8   6  303.97   43.30
  -2   8   6  256.17   48.50
   2  -8  -6  279.27   43.30
   2  -8  -6  338.47   43.20
  -1   7   6  379.66   53.39
   1  -7  -6  381.96   53.99
   1  -7  -6  346.37   53.49
   1  -7  -6  384.56   58.09
   1  -7  -6  371.76   53.39
   0   6   6  556.04   72.09
   0   6   6  441.86   74.09
   0  -6  -6  568.44   75.19
   0  -6  -6  440.86   72.39
   1   5   6  146.69   25.00
  -1  -5  -6  155.78   25.60
   2   4   6   85.59   13.20
  -2  -4  -6   91.69   13.40
  -2  -4  -6  100.79   13.60
  -2  -4  -6   89.49   16.60
   3   3   6   32.70    5.90
   3   3   6   30.00    8.30
  -3  -3  -6   50.29    9.70
  -3  -3  -6   42.60    6.10
   4   2   6  153.88   25.60
   4   2   6  172.38   24.20
  -4  -2  -6  167.48   24.20
   5   1   6  261.87   40.00
   5   1   6  270.47   38.60
   5   1   6  275.97   38.60
  -5  -1  -6  257.97   38.60
  -6   0  -6  216.48   33.50
  -6   0  -6  220.48   31.80
   7  -1   6   47.20    7.50
   7  -1   6   50.09    8.00
   7  -1   6   59.19   14.40
  -7   1  -6   49.99    7.50
  -7   1  -6   57.49    8.10
   8  -2   6   80.39   11.40
  -8   2  -6   71.09   11.50
  -8   2  -6   82.99   12.10
  -8   2  -6   86.39   17.70
   9  -3   6    0.20    3.20
   9  -3   6  -22.80   18.50
  -9   3  -6    6.30    3.60
  -9   3  -6    1.80   14.60
  -9   3  -6    8.90    3.70
  11  -5   6  254.27   36.80
 -11   5  -6  244.48   36.10
 -11   5  -6  248.48   36.70
  12  -6   6  323.27   46.60
  12  -6   6  325.17   45.60
 -12   6  -6  366.06   61.49
 -12   6  -6  281.87   46.30
 -12   6  -6  318.77   45.70
  13  -7   6  217.08   30.70
 -13   7  -6  175.28   28.90
 -13   7  -6  197.28   30.30
 -13   7  -6  247.38   41.90
  14  -8   6   22.80   54.79
  14  -8   6  137.79   19.70
  14  -8   6  128.49   24.30
 -14   8  -6   96.39   57.09
 -14   8  -6  126.49   46.30
  15  -9   6   98.79   17.80
 -15   9  -6   64.09   12.00
 -15   9  -6  205.68   97.59
  16 -10   6   49.90   17.00
  16 -10   6   21.00    7.70
 -16  10  -6   18.70    7.00
  17 -11   6   35.80   21.70
  18 -12   6   16.40   30.00
 -18  12  -6   -9.80    8.90
  19 -13   6   74.39   32.50
  -8  15   7  -10.30    8.20
  -8  15   7   31.80   81.69
   8 -15  -7    1.40   21.90
   8 -15  -7   -7.70   17.10
  -7  14   7   35.10   62.89
  -7  14   7    3.60    7.40
   7 -14  -7  -16.50   15.10
   7 -14  -7  -16.10   18.60
  -6  13   7    6.60    6.10
  -6  13   7  -31.70   45.80
   6 -13  -7    8.80   13.70
   6 -13  -7  -11.60   13.40
   6 -13  -7   -1.70    3.60
  -5  12   7   67.99   12.50
  -5  12   7  112.79   38.90
   5 -12  -7   48.90   14.10
   5 -12  -7   36.20   12.70
   5 -12  -7   32.50    7.80
   5 -12  -7   37.80    8.00
  -4  11   7  284.07   50.19
   4 -11  -7  221.78   34.10
   4 -11  -7  214.88   32.00
  -3  10   7  158.18   25.70
  -3  10   7  163.48   26.80
  -3  10   7  238.38   37.60
   3 -10  -7  174.68   27.20
   3 -10  -7  187.08   25.40
  -2   9   7  109.69   14.70
  -2   9   7   88.99   26.30
  -2   9   7    7.10   48.40
  -2   9   7  106.89   15.00
   2  -9  -7   86.49   16.40
   2  -9  -7   92.79   14.60
  -1   8   7   39.10    6.60
  -1   8   7   54.29   16.30
  -1   8   7   29.20    4.60
  -1   8   7   36.80    5.30
   1  -8  -7   14.00   18.70
   1  -8  -7   21.50    4.50
   1  -8  -7   28.00    5.10
   0   7   7  165.48   30.70
   0   7   7  178.88   25.20
   0   7   7  178.68   25.40
   0   7   7  163.48   25.80
   0  -7  -7  183.88   26.00
   0  -7  -7  149.49   32.00
   1   6   7  720.33  102.99
   1   6   7  693.43  101.09
  -1  -6  -7  715.83  103.39
  -1  -6  -7  681.43  100.89
   2   5   7  406.66   57.39
   2   5   7  357.36   57.09
   2   5   7  357.06   59.19
  -2  -5  -7  435.16   59.79
  -2  -5  -7  433.16   57.29
   3   4   7  170.48   26.90
  -3  -4  -7  166.88   27.00
  -3  -4  -7  166.08   24.50
   4   3   7  115.49   16.90
   4   3   7  119.79   19.40
  -4  -3  -7  113.69   17.00
  -4  -3  -7  113.99   16.90
   5   2   7   18.90    7.60
   5   2   7   25.90    4.30
  -5  -2  -7   18.30    3.90
  -5  -2  -7   20.10    8.50
  -5  -2  -7   24.50    4.10
   6   1   7   22.00   13.20
   6   1   7    7.90    8.10
   6   1   7    8.30    2.90
  -6  -1  -7    6.70    2.60
  -6  -1  -7    8.10    6.60
  -6  -1  -7    5.20    2.30
   7   0   7    0.10    1.30
   7   0   7   -0.50    2.20
   7   0   7  -10.20   10.30
  -7   0  -7   -4.00    8.00
  -7   0  -7    2.80    2.60
  -7   0  -7    0.40    2.00
   8  -1   7    7.00   13.60
   8  -1   7   28.90    4.80
   8  -1   7    2.10   11.40
  -8   1  -7   12.30   25.80
  -8   1  -7   26.20    4.10
   9  -2   7  152.48   22.00
   9  -2   7  138.79   21.60
  -9   2  -7  160.08   22.20
 -10   3  -7  517.85   74.99
  11  -4   7  418.46   65.29
 -11   4  -7  455.25   65.29
 -11   4  -7  477.65   65.59
  12  -5   7  442.26   60.69
  12  -5   7  431.26   59.99
 -12   5  -7  396.86   60.59
 -12   5  -7  343.07   69.29
 -12   5  -7  413.06   60.69
  13  -6   7  111.59   21.90
 -13   6  -7  130.39   21.80
 -13   6  -7  165.88   21.90
  14  -7   7   31.70   11.10
  14  -7   7   44.00    7.40
  14  -7   7    8.50   41.20
 -14   7  -7   19.70   37.20
 -14   7  -7   92.29   48.10
  15  -8   7    4.30   11.80
  15  -8   7  -49.90   50.39
 -15   8  -7    7.90    4.40
 -15   8  -7   -7.40   41.60
 -15   8  -7    0.10   56.19
  16  -9   7  -23.60   15.80
  16  -9   7  -13.50    5.00
 -16   9  -7   -3.30    5.30
 -16   9  -7   -4.30   12.50
  17 -10   7  -13.20   18.10
 -17  10  -7    2.80    6.80
  18 -11   7   49.20   25.80
  19 -12   7   72.39   32.50
   8 -16  -8  -13.50   20.60
  -7  15   8   91.69   78.19
  -7  15   8    8.30    8.90
   7 -15  -8    1.70   18.20
   7 -15  -8   19.80   23.40
  -6  14   8   42.20   10.10
  -6  14   8   48.40   60.39
   6 -14  -8   67.29   18.80
   6 -14  -8   43.10   18.30
  -5  13   8   49.30   45.80
   5 -13  -8   36.80   14.70
   5 -13  -8   15.20    7.20
   5 -13  -8   28.20   15.10
  -4  12   8  -36.00   35.40
  -4  12   8   12.90    5.50
  -4  12   8    8.40    9.90
   4 -12  -8   10.00    4.80
   4 -12  -8  -21.40   10.80
   4 -12  -8   15.80   12.90
  -3  11   8   71.89   30.40
  -3  11   8   46.00   65.79
   3 -11  -8   27.50   11.50
   3 -11  -8   50.39    7.80
   3 -11  -8   68.89   13.80
  -2  10   8  322.97   48.40
  -2  10   8  327.07   47.30
  -2  10   8  364.66   56.69
   2 -10  -8  323.47   48.70
   2 -10  -8  321.37   49.30
  -1   9   8  338.47   60.49
  -1   9   8  412.16   54.99
  -1   9   8  374.86   54.39
   1  -9  -8  360.46   55.29
   0   8   8  381.66   61.79
   0   8   8  404.36   57.19
   0  -8  -8  443.86   63.59
   0  -8  -8  376.46   57.79
   1   7   8  330.67   47.10
   1   7   8  336.37   46.60
   1   7   8  345.07   50.89
  -1  -7  -8  284.17   47.10
  -1  -7  -8  340.57   51.79
   2   6   8  109.19   16.40
  -2  -6  -8  114.59   16.70
  -2  -6  -8  135.59   23.80
   3   5   8    8.30    8.90
   3   5   8    3.00    2.40
  -3  -5  -8   14.90   11.30
  -3  -5  -8    8.70    3.60
  -3  -5  -8    8.10    2.80
   4   4   8   52.59    8.50
   4   4   8   56.69    8.30
   4   4   8   36.00   12.00
  -4  -4  -8   60.69   13.60
   5   3   8   50.39    9.00
   5   3   8   51.89   12.10
   5   3   8   64.09    9.00
  -5  -3  -8   59.09    9.00
  -6  -2  -8  219.38   31.90
   7   1   8 1124.79  158.28
  -7  -1  -8 1074.29  158.28
   8   0   8 1317.77  194.78
   8   0   8 1278.17  192.88
  -8   0  -8 1425.06  193.08
   9  -1   8  388.36   59.29
   9  -1   8  433.06   59.09
  -9   1  -8  404.96   59.39
  10  -2   8  383.46   57.59
  10  -2   8  392.36   57.89
 -10   2  -8  448.16   61.79
  13  -5   8   -8.00   30.10
  13  -5   8   36.40    8.20
  13  -5   8   34.10    5.60
 -13   5  -8   17.20    8.00
 -13   5  -8   32.80   26.50
  14  -6   8   38.40    6.00
  14  -6   8   33.70    9.60
  14  -6   8   -3.00   39.30
 -14   6  -8   20.20    9.90
 -14   6  -8   45.20   31.60
 -14   6  -8   28.00    9.10
 -14   6  -8   31.60    6.30
 -14   6  -8  -41.20   47.10
  15  -7   8    6.50    9.80
  15  -7   8   -2.40    3.80
  15  -7   8  -50.29   46.60
 -15   7  -8  -61.19   55.09
 -15   7  -8   -9.70   38.50
 -15   7  -8    7.70    4.30
 -15   7  -8    0.30    9.20
  16  -8   8    6.90   14.10
  16  -8   8   -4.90    4.50
 -16   8  -8   25.90   44.20
 -16   8  -8   -4.80   11.20
 -16   8  -8    2.70    5.10
  17  -9   8   12.60   16.40
  17  -9   8   -1.40    5.90
 -17   9  -8    6.50    6.10
  18 -10   8   72.19   20.30
 -18  10  -8   34.60    9.60
  19 -11   8   31.00   45.30
  20 -12   8   65.59   31.70
   7 -16  -9   33.70   23.10
  -6  15   9    5.40   10.10
  -6  15   9   78.19   71.89
   6 -15  -9  -15.10   22.60
   6 -15  -9   16.20   19.80
  -5  14   9   27.90    8.90
  -5  14   9  124.49   56.29
   5 -14  -9   24.60   17.90
   5 -14  -9   24.40   18.80
  -4  13   9   65.19   42.50
   4 -13  -9   87.49   19.30
   4 -13  -9   95.29   19.20
  -3  12   9  182.78   27.00
  -3  12   9  145.49   45.70
   3 -12  -9  179.28   30.90
   3 -12  -9  183.58   30.50
  -2  11   9  183.18   25.00
  -2  11   9  143.59   37.60
   2 -11  -9  153.58   27.30
   2 -11  -9  130.99   25.50
  -1  10   9  249.18   38.40
   1 -10  -9  266.27   39.70
   0   9   9    5.40    5.60
   0   9   9   23.40   28.70
   0   9   9   13.20    2.70
   0   9   9   17.20   19.10
   0   9   9   14.70    4.00
   0  -9  -9    5.30    4.00
   0  -9  -9   -1.70   23.40
   0  -9  -9   22.30    6.60
   1   8   9    1.70    1.60
   1   8   9   -5.10    3.00
   1   8   9    2.10   15.00
   1   8   9    2.50    4.70
  -1  -8  -9   11.40   18.90
  -1  -8  -9   -2.10    4.70
  -1  -8  -9   -5.10    2.80
   2   7   9   33.70   16.00
   2   7   9   52.19    8.20
   2   7   9   40.20    6.60
  -2  -7  -9   31.70   17.70
  -2  -7  -9   48.80    7.30
  -3  -6  -9  222.28   35.10
  -3  -6  -9  239.18   39.60
  -3  -6  -9  256.17   34.90
   4   5   9  343.37   47.00
  -4  -5  -9  304.47   47.00
  -5  -4  -9 1344.57  203.78
  -5  -4  -9 1497.55  205.48
   6   3   9  869.71  119.89
   6   3   9  789.22  118.39
  -6  -3  -9  836.72  120.19
  -6  -3  -9  902.51  118.49
  -6  -3  -9  722.53  118.29
   7   2   9  343.07   48.80
  -7  -2  -9  339.97   48.70
  -7  -2  -9  316.67   48.70
  -7  -2  -9  351.96   51.29
   9   0   9    0.10   12.90
   9   0   9    2.20    1.90
   9   0   9   -1.50    2.90
  -9   0  -9   -5.60    3.40
  -9   0  -9   -0.50   11.10
  -9   0  -9   -0.60    2.80
  10  -1   9   44.20    8.80
  10  -1   9   55.39    8.20
 -10   1  -9   82.19   16.40
  11  -2   9   49.20   24.40
  11  -2   9   46.40    6.70
 -11   2  -9   57.09   18.00
 -11   2  -9   33.20    6.80
 -11   2  -9   57.29    8.50
  12  -3   9  -26.30   28.00
 -12   3  -9   14.50   18.90
 -12   3  -9   21.30    6.20
  13  -4   9    8.20   34.70
  13  -4   9  -13.40    5.50
  13  -4   9   -1.10    2.20
 -13   4  -9   -1.90    6.60
 -13   4  -9    1.50    5.90
 -13   4  -9    0.10    2.80
 -13   4  -9    0.60   21.10
  14  -5   9  -26.50   38.60
  14  -5   9   41.60    6.90
 -14   5  -9   46.80   35.10
 -14   5  -9   38.70   10.30
 -14   5  -9   37.70    9.80
 -14   5  -9   76.29   29.30
  15  -6   9   24.60   46.10
 -15   6  -9    3.50   44.20
 -15   6  -9   19.80    9.20
 -15   6  -9   16.20    4.80
 -15   6  -9    2.00   32.20
  16  -7   9   58.99   60.79
 -16   7  -9   73.89   43.90
  17  -8   9   13.60   15.00
 -17   8  -9   -3.40   12.80
 -17   8  -9   15.00    6.40
  18  -9   9   63.19   21.70
  19 -10   9   94.89   27.00
  20 -11   9   79.89   30.10
   6 -16 -10   60.49   23.50
  -5  15  10  109.19   71.19
  -5  15  10   59.89   13.80
   5 -15 -10   26.00   23.50
   5 -15 -10  108.09   22.70
  -4  14  10   37.60   53.89
   4 -14 -10   25.20   16.60
   4 -14 -10   21.20   17.40
  -3  13  10   36.50    8.10
  -3  13  10   25.30   41.80
   3 -13 -10    8.70   12.60
   3 -13 -10   20.60   15.30
  -2  12  10  -39.30   33.70
  -2  12  10   12.00    5.60
  -2  12  10   -0.10    9.10
   2 -12 -10   -6.50   10.30
   2 -12 -10    3.40    5.50
   2 -12 -10   -5.60   12.30
  -1  11  10    2.00    7.60
  -1  11  10    4.40    2.70
  -1  11  10    6.90    4.50
  -1  11  10   12.50   26.60
   1 -11 -10   -4.70   10.90
   1 -11 -10   -0.90    4.50
   1 -11 -10    2.10    8.80
   0  10  10   34.70    7.90
   0  10  10   13.70   23.70
   0  10  10   23.90    4.10
   0 -10 -10   24.00   10.80
   0 -10 -10   43.50   29.20
   0 -10 -10   16.30    5.70
   0 -10 -10   11.90    8.40
   1   9  10   44.00   21.10
   1   9  10   40.80    8.40
   1   9  10   40.50    6.20
  -1  -9 -10   28.30    6.80
  -1  -9 -10   59.39    9.60
  -1  -9 -10   77.59   25.60
   2   8  10   88.39   13.80
   2   8  10   95.49   13.00
   2   8  10   74.59   12.40
   2   8  10   85.99   22.00
  -2  -8 -10   72.59   23.30
  -2  -8 -10   88.49   14.40
   3   7  10  212.88   29.70
  -3  -7 -10  200.78   30.00
  -3  -7 -10  200.38   30.50
   4   6  10  315.57   48.70
   4   6  10  373.46   48.50
  -4  -6 -10  314.17   49.00
   5   5  10   13.90    4.20
   5   5  10    0.10   11.20
  -5  -5 -10   44.10   13.10
  -5  -5 -10   13.40    4.40
  -5  -5 -10   14.00    3.90
   6   4  10    5.00   10.90
   6   4  10    3.60    3.50
   6   4  10   -0.60    3.10
  -6  -4 -10    6.30    3.30
  -6  -4 -10    2.30   12.20
  -6  -4 -10   10.50    3.80
   7   3  10  122.79   20.40
  -7  -3 -10   92.09   15.00
  -7  -3 -10  100.39   19.90
   8   2  10  427.76   57.59
   8   2  10  350.76   60.09
  -8  -2 -10  395.66   57.49
  -8  -2 -10  396.76   57.49
   9   1  10   86.59   13.40
   9   1  10  101.39   13.80
  -9  -1 -10   81.99   13.70
  -9  -1 -10  102.09   19.30
  10   0  10   45.20    8.20
  10   0  10   62.19    8.90
  10   0  10   83.49   19.60
 -10   0 -10   49.10    9.20
 -10   0 -10   87.89   17.50
  11  -1  10  -13.30   18.30
  11  -1  10    9.00    3.90
 -11   1 -10    1.00    4.80
 -11   1 -10    6.60   13.60
  12  -2  10    3.30    4.20
  12  -2  10   16.80   27.70
  12  -2  10    3.60    2.30
 -12   2 -10    8.10   15.90
 -12   2 -10    5.30    2.60
 -12   2 -10   15.40    5.70
  13  -3  10  -31.70   29.10
 -13   3 -10   26.70   21.90
  14  -4  10   -0.60    6.00
  14  -4  10   -6.40   31.60
  14  -4  10    2.90    2.50
 -14   4 -10  -18.50   25.00
 -14   4 -10   -0.40    6.90
 -14   4 -10   -2.50    7.90
 -14   4 -10    3.80    3.30
 -14   4 -10   44.50   25.90
  15  -5  10   48.90   10.90
  15  -5  10   47.80    8.30
  15  -5  10  -55.49   42.70
 -15   5 -10   46.90   11.50
 -15   5 -10   97.89   34.40
  16  -6  10   91.19   17.70
  16  -6  10   94.19   14.40
  16  -6  10   14.30   52.89
 -16   6 -10  152.88   39.70
 -16   6 -10   88.29   15.10
 -16   6 -10  108.29   18.40
 -16   6 -10   89.49   59.99
  17  -7  10   89.69   16.70
 -17   7 -10  145.99   21.20
 -17   7 -10  118.29   17.70
 -17   7 -10  115.59   46.20
  18  -8  10  100.19   22.80
 -18   8 -10   92.69   16.10
  19  -9  10   42.50   19.90
 -19   9 -10   35.60   10.60
  20 -10  10   30.80   43.20
 -20  10 -10    6.70   10.30
  21 -11  10   46.10   31.90
   6 -17 -11   -6.60   27.80
  -4  15  11   11.70    9.80
  -4  15  11   -9.00   68.59
   4 -15 -11  -12.70   19.60
   4 -15 -11   25.60   21.00
  -3  14  11    7.70    8.60
   3 -14 -11    1.10   15.40
   3 -14 -11    6.50   16.40
  -2  13  11    8.20    6.90
  -2  13  11   21.40   42.30
   2 -13 -11   -3.80   15.40
   2 -13 -11   15.00   13.00
   2 -13 -11   20.30   13.90
  -1  12  11    3.20    9.90
  -1  12  11  -15.80   33.70
  -1  12  11    5.80    3.20
  -1  12  11   -1.70    5.70
   1 -12 -11    2.50   10.60
   1 -12 -11   -2.20   13.70
   0  11  11   85.49   13.90
   0  11  11  124.69   33.90
   0  11  11   90.19   17.00
   0 -11 -11   91.79   14.80
   0 -11 -11  134.99   20.80
   1  10  11  214.78   32.60
  -1 -10 -11  238.08   33.20
   2   9  11   60.19   23.00
   2   9  11   69.59   10.30
  -2  -9 -11   96.29   13.80
  -2  -9 -11   57.19   11.10
   3   8  11   11.20    2.50
   3   8  11    9.30   17.40
   3   8  11   14.60    4.00
   3   8  11   15.80    6.00
  -3  -8 -11   12.20   21.20
  -3  -8 -11   22.40    5.00
  -3  -8 -11   -2.70    5.50
   4   7  11  151.58   31.20
  -4  -7 -11  153.38   24.30
  -4  -7 -11  208.18   34.40
  -4  -7 -11  173.28   24.70
   5   6  11  461.35   71.59
   5   6  11  569.54   75.19
  -5  -6 -11  487.05   71.69
   6   5  11  893.01  123.89
  -6  -5 -11  931.01  124.89
  -6  -5 -11  745.33  121.69
   7   4  11  547.05   71.29
   7   4  11  459.75   73.79
  -7  -4 -11  460.95   71.29
   8   3  11  184.48   33.70
   8   3  11  201.48   29.80
  -8  -3 -11  230.18   35.20
  -8  -3 -11  202.58   29.80
   9   2  11   85.19   27.80
   9   2  11   83.79   12.90
   9   2  11   93.59   20.00
  -9  -2 -11   79.79   12.60
  -9  -2 -11   63.39   18.90
  10   1  11   11.00    3.90
  10   1  11    8.90   24.00
  10   1  11    1.40    2.40
  10   1  11    4.00   15.70
 -10  -1 -11   -0.80    4.00
 -10  -1 -11    2.60    3.50
 -10  -1 -11    3.30   14.20
  11   0  11    3.30    2.50
  11   0  11  -27.50   29.90
  11   0  11  -14.60   18.10
  11   0  11    4.10    3.60
 -11   0 -11   -3.30    3.50
 -11   0 -11    5.00   14.90
 -11   0 -11   -2.20    4.40
  12  -1  11    8.70    4.30
  12  -1  11   48.30   25.50
 -12   1 -11   15.00    6.10
 -12   1 -11   19.90   15.90
  13  -2  11  179.08   27.70
  13  -2  11  194.58   28.30
 -13   2 -11  204.08   28.80
  14  -3  11  193.48   25.80
 -14   3 -11  154.28   24.90
  15  -4  11  441.36   61.89
  15  -4  11  412.46   60.99
 -15   4 -11  385.66   61.19
 -15   4 -11  464.75   62.19
  16  -5  11  222.98   31.60
 -16   5 -11  258.97   50.89
 -16   5 -11  192.28   33.80
  17  -6  11   90.89   16.70
  17  -6  11   88.19   12.60
  17  -6  11  -33.80   63.19
 -17   6 -11   61.09   13.30
 -17   6 -11   87.79   17.00
  18  -7  11    1.90    4.70
  18  -7  11    4.30   13.60
 -18   7 -11   -1.60    6.90
  19  -8  11  -10.00   16.40
 -19   8 -11   -1.70    8.60
  20  -9  11  -10.20   20.90
  21 -10  11   45.60   27.70
   5 -17 -12  -23.20   26.20
   4 -16 -12   -8.40   21.80
  -3  15  12    5.40    9.90
  -3  15  12   -5.30   72.19
   3 -15 -12    2.60   18.90
   3 -15 -12    4.00   19.10
  -2  14  12    6.60    8.40
   2 -14 -12  -26.10   16.80
   2 -14 -12    1.90   17.30
  -1  13  12   29.50   44.50
   1 -13 -12   42.90   17.50
   1 -13 -12   41.40    9.60
   1 -13 -12   11.20   15.10
   0  12  12    1.10    6.30
   0  12  12   12.50    3.60
   0  12  12    5.30   34.50
   0  12  12   13.00   10.20
   0 -12 -12  -17.10   13.50
   0 -12 -12   18.80   11.80
   0 -12 -12    8.10    6.70
   1  11  12   10.30    3.30
   1  11  12   19.70   28.30
   1  11  12    9.00    5.90
  -1 -11 -12   36.50   38.40
  -1 -11 -12   22.20    9.80
  -1 -11 -12   14.20    6.00
  -1 -11 -12   -9.20   10.30
   2  10  12   85.69   16.30
   2  10  12  115.09   31.00
   2  10  12   82.39   14.00
   2  10  12  109.59   15.80
  -2 -10 -12  114.79   18.20
  -2 -10 -12  126.49   34.90
   3   9  12  216.78   49.40
   3   9  12  293.27   40.10
  -3  -9 -12  273.27   41.60
   4   8  12  410.86   62.39
   4   8  12  371.96   56.09
  -4  -8 -12  425.96   65.49
  -4  -8 -12  388.56   56.49
   5   7  12  245.58   35.30
   5   7  12  272.67   42.60
   5   7  12  219.18   36.10
   5   7  12  264.57   35.80
  -5  -7 -12  225.78   35.90
  -5  -7 -12  255.07   36.20
   6   6  12  109.69   25.30
   6   6  12  138.39   19.50
  -6  -6 -12  119.19   19.20
  -6  -6 -12  132.19   19.90
   7   5  12   22.20    5.50
   7   5  12   37.90   15.20
  -7  -5 -12   25.00    5.90
  -7  -5 -12   38.80   18.10
   8   4  12    7.20   11.70
   8   4  12   -1.70    7.10
   8   4  12   -7.90    3.80
  -8  -4 -12  -10.50   14.00
  -8  -4 -12   -1.40    3.70
  -8  -4 -12   -5.70    3.60
   9   3  12   27.80    5.20
   9   3  12   15.40    5.30
   9   3  12   17.20   14.50
  -9  -3 -12   15.30    4.70
  -9  -3 -12    1.50   14.10
  -9  -3 -12   10.10    5.10
  10   2  12   62.49   29.40
  10   2  12   78.39   11.00
  10   2  12  107.89   21.00
 -10  -2 -12   66.99   11.00
 -10  -2 -12   47.50   10.50
  11   1  12  179.28   26.10
  11   1  12  177.98   26.60
  13  -1  12  454.65   73.59
  13  -1  12  531.85   73.29
 -13   1 -12  545.25   73.69
 -13   1 -12  495.65   73.89
  14  -2  12  272.07   40.00
 -14   2 -12  269.07   40.40
  15  -3  12  -13.90   36.00
  15  -3  12   59.59   10.10
  15  -3  12   53.69    8.30
 -15   3 -12   47.40   11.00
 -15   3 -12   58.49   27.40
 -15   3 -12   35.70    8.00
  16  -4  12   16.30   49.40
  16  -4  12    8.20    3.50
  16  -4  12   -1.60    8.50
 -16   4 -12    7.70    4.60
 -16   4 -12    1.20    8.70
 -16   4 -12   18.00   30.20
  17  -5  12   22.90   10.40
  17  -5  12  -23.20   56.49
 -17   5 -12    1.60   11.50
 -17   5 -12   13.10    5.60
 -17   5 -12   -3.60   36.90
  18  -6  12   24.60    6.30
  18  -6  12   37.50   14.70
 -18   6 -12   31.00   47.60
 -18   6 -12   10.60   14.00
  19  -7  12   12.80   16.40
 -19   7 -12    7.00    9.00
  20  -8  12    4.20   19.00
 -20   8 -12    3.60    9.80
  21  -9  12   48.30   26.00
  22 -10  12    8.30   28.60
   4 -17 -13  -42.10   26.50
   3 -16 -13  -16.70   23.20
  -2  15  13   10.50   11.10
   2 -15 -13   27.40   22.70
  -1  14  13   26.60   10.20
  -1  14  13   -8.50   54.79
   1 -14 -13   63.39   20.20
   1 -14 -13  -15.50   17.50
   0  13  13   50.89    9.00
   0  13  13   62.99   45.40
   0 -13 -13   53.99   19.20
   0 -13 -13   72.59   16.20
   0 -13 -13   52.89   11.90
   1  12  13  156.88   21.10
   1  12  13  117.49   43.10
   1  12  13  120.69   19.70
  -1 -12 -13  138.09   23.80
  -1 -12 -13  119.99   23.80
   2  11  13  119.79   21.10
   2  11  13  119.99   17.60
   2  11  13  116.59   37.60
  -2 -11 -13   57.89   43.30
   3  10  13   94.09   13.70
   3  10  13   97.59   30.40
  -3 -10 -13   71.89   35.90
  -3 -10 -13   86.79   15.50
   4   9  13   -9.00   21.10
   4   9  13   -1.10    6.00
   4   9  13   12.80    4.80
   4   9  13    2.80    2.30
  -4  -9 -13   -5.00   28.30
  -4  -9 -13   -2.30    6.50
  -4  -9 -13    2.80    5.40
   5   8  13   22.10    5.60
   5   8  13    7.60   19.50
   5   8  13   12.60    6.30
  -5  -8 -13   13.20    7.20
  -5  -8 -13   14.60    6.40
   6   7  13    4.10    5.40
   6   7  13   16.50    4.60
   6   7  13    9.80    2.40
   6   7  13   29.30   18.60
  -6  -7 -13    1.20    6.50
  -6  -7 -13    0.60   20.00
  -6  -7 -13    9.20    5.20
   7   6  13   42.60   19.00
   7   6  13   35.30    8.50
   7   6  13   57.69    8.60
  -7  -6 -13   71.89   23.40
  -7  -6 -13   43.30    8.30
   8   5  13  165.98   25.00
   8   5  13  173.08   31.90
   8   5  13  157.78   24.90
  -8  -5 -13  171.58   25.10
  -8  -5 -13  181.78   33.60
   9   4  13  175.28   26.30
   9   4  13  149.59   46.80
  -9  -4 -13  181.58   26.30
 -10  -3 -13  262.47   42.70
 -10  -3 -13  236.68   35.60
  11   2  13  203.88   29.80
  11   2  13  171.88   37.60
 -11  -2 -13  210.98   29.80
 -11  -2 -13  172.08   37.20
  12   1  13   53.29   10.30
 -12  -1 -13   74.99   11.20
 -12  -1 -13   72.89   11.90
 -12  -1 -13   99.59   22.10
  13   0  13   -0.60    3.10
  13   0  13    3.90   22.70
  13   0  13   -5.20    4.60
  13   0  13  -16.20   39.70
 -13   0 -13    4.00    6.40
 -13   0 -13    1.90    4.40
 -13   0 -13   15.80   21.10
  14  -1  13   88.79   15.70
  14  -1  13  105.79   14.60
  14  -1  13   79.69   32.70
 -14   1 -13   83.49   15.60
 -14   1 -13  129.39   30.10
 -14   1 -13   89.29   16.60
  15  -2  13  153.48   20.60
  15  -2  13  124.59   21.80
 -15   2 -13  109.69   35.70
 -15   2 -13  122.19   22.60
 -15   2 -13  141.39   21.90
  16  -3  13   94.39   13.80
  16  -3  13   78.59   15.40
  16  -3  13  -16.40   40.70
 -16   3 -13  127.89   31.70
 -16   3 -13   90.29   16.60
  17  -4  13   11.00    5.00
  17  -4  13   10.20   10.00
  17  -4  13   40.90   56.79
 -17   4 -13   37.20   35.90
 -17   4 -13    8.60   15.70
 -17   4 -13   19.10    5.80
  18  -5  13  -79.69   63.59
  18  -5  13    2.80    4.30
  18  -5  13  -19.10   11.00
 -18   5 -13   -0.60   13.10
 -18   5 -13   -0.60   42.50
 -18   5 -13    4.30    6.30
  19  -6  13    7.80   13.40
 -19   6 -13   10.00    8.50
  20  -7  13   26.20   18.60
 -20   7 -13   16.50    9.70
 -21   8 -13    7.90   10.90
  22  -9  13   64.19   29.60
 -22   9 -13   19.80   14.70
   4 -18 -14   27.40   33.00
   3 -17 -14  -12.00   28.70
   2 -16 -14   27.60   24.10
  -1  15  14  116.99   21.00
   0  14  14   99.19   16.70
   0  14  14   59.89   60.49
   0 -14 -14   51.79   22.70
   0 -14 -14   83.29   23.90
   1  13  14   27.50    9.30
   1  13  14   27.70    6.40
   1  13  14   82.29   47.20
  -1 -13 -14   41.20   17.70
  -1 -13 -14   24.20   14.80
   2  12  14    4.20    7.70
   2  12  14   39.30   39.40
  -2 -12 -14   22.80    8.10
  -2 -12 -14   30.80   53.09
  -2 -12 -14   12.40   15.80
   3  11  14    2.10    9.50
   3  11  14   16.30   32.90
   3  11  14   15.10    6.70
   3  11  14    2.70    3.30
  -3 -11 -14    8.20   39.60
  -3 -11 -14   17.30    7.00
  -3 -11 -14    2.40   10.40
   4  10  14   15.30    6.40
   4  10  14   -1.50    7.10
   4  10  14   -1.40    2.70
   4  10  14    8.30   27.40
  -4 -10 -14    6.50    6.40
  -4 -10 -14    4.60   35.70
  -4 -10 -14   -3.10    9.90
   5   9  14    4.60   24.70
   5   9  14   -8.20    6.60
   5   9  14    2.40    6.30
   5   9  14   -0.90    2.40
  -5  -9 -14   -8.30    5.80
  -5  -9 -14   39.50   30.40
  -5  -9 -14    2.00    8.20
   6   8  14    7.30    6.80
   6   8  14   -5.70   21.00
   6   8  14   14.60    5.20
   6   8  14   12.10    2.80
  -6  -8 -14   -9.40   26.60
  -6  -8 -14   11.60    6.10
  -6  -8 -14   13.00    7.10
   7   7  14   67.89   22.80
   7   7  14   67.89   12.70
  -7  -7 -14   76.79   27.90
   8   6  14  127.69   18.60
   8   6  14  122.09   26.90
  -8  -6 -14  104.19   30.40
  -8  -6 -14  106.39   19.10
   9   5  14   59.59   11.40
   9   5  14   65.59   11.30
   9   5  14   68.19   20.70
  -9  -5 -14   90.69   25.00
  -9  -5 -14   51.39   11.10
  -9  -5 -14   80.59   11.70
  11   3  14   48.70    8.70
  11   3  14   78.09   21.50
 -11  -3 -14   42.90   20.50
 -11  -3 -14   53.49    9.60
 -11  -3 -14   57.99    9.70
  12   2  14  342.77   50.89
  12   2  14  281.97   41.90
 -12  -2 -14  279.87   42.20
  13   1  14  181.88   36.20
 -13  -1 -14  158.98   25.30
 -13  -1 -14  176.18   35.10
 -13  -1 -14  171.48   25.80
  14   0  14  263.27   36.10
  14   0  14  220.18   35.40
 -14   0 -14  233.38   45.50
 -14   0 -14  256.37   36.10
  15  -1  14   82.69   15.30
  15  -1  14  141.09   38.50
  15  -1  14   95.29   13.60
 -15   1 -14   81.69   15.70
 -15   1 -14   72.99   15.00
  16  -2  14   -3.80   40.40
  16  -2  14   -2.50    3.70
  16  -2  14   -0.80    7.30
 -16   2 -14  -14.00   29.10
 -16   2 -14    9.00    9.50
 -16   2 -14   -1.80    7.20
  17  -3  14  -81.59   50.89
  17  -3  14    3.80    8.90
 -17   3 -14   -4.40   10.30
 -17   3 -14   -0.90   33.00
  18  -4  14  -25.80   63.99
  18  -4  14    1.80    4.40
  18  -4  14   10.60   11.60
 -18   4 -14   -0.30    6.40
 -18   4 -14    6.70   11.40
 -18   4 -14  -13.30   38.50
  19  -5  14   51.99   17.00
  20  -6  14   56.19   18.40
 -20   6 -14   66.79   13.90
  21  -7  14   87.69   25.20
 -21   7 -14   83.09   23.60
  22  -8  14  104.09   27.60
 -22   8 -14   59.19   17.40
   3 -18 -15   14.40   35.40
   2 -17 -15   14.60   28.00
   1 -16 -15   -9.60   24.60
   0  15  15    3.50   11.20
   0 -15 -15    6.50   22.60
   1  14  15   35.60   10.80
   1  14  15   23.30   59.09
   1  14  15    3.00    5.50
  -1 -14 -15  -25.80   18.80
  -1 -14 -15    8.70   20.10
   2  13  15   13.70    5.20
   2  13  15   -6.30   44.40
   2  13  15   17.60    8.80
  -2 -13 -15    6.80   15.20
  -2 -13 -15   11.60   17.60
   3  12  15  -29.50   36.20
   3  12  15    1.50    3.80
   3  12  15    9.50    7.40
  -3 -12 -15  -18.30   15.20
  -3 -12 -15   12.50   11.00
  -3 -12 -15   -3.60   48.90
  -3 -12 -15  -12.90   11.90
   4  11  15   23.80   34.70
   4  11  15    8.50   10.30
   4  11  15   27.40    7.90
   4  11  15    7.90    4.00
  -4 -11 -15   25.80    8.60
  -4 -11 -15  -15.70   47.00
  -4 -11 -15    2.20   11.60
   5  10  15   32.80   31.10
   5  10  15   45.60    7.20
   5  10  15   21.60   10.30
  -5 -10 -15   33.30   12.90
  -5 -10 -15   87.69   41.00
  -5 -10 -15   49.50   10.10
   6   9  15   20.30   28.20
   6   9  15   91.49   13.60
   6   9  15   64.39   13.70
   6   9  15   78.09   11.60
  -6  -9 -15  102.09   38.00
  -6  -9 -15   65.49   13.20
   7   8  15   14.30   24.00
   7   8  15   36.80    5.80
   7   8  15   30.30    8.70
   7   8  15   40.10   11.10
  -7  -8 -15   26.70    9.00
  -7  -8 -15   30.60    8.50
  -7  -8 -15   36.80   30.40
   8   7  15    9.90    5.60
   8   7  15    8.70    6.20
   8   7  15   21.10   22.20
  -8  -7 -15   24.00   28.00
  -8  -7 -15   -3.80    6.60
  -8  -7 -15    0.90    6.20
   9   6  15   24.40    7.20
   9   6  15   41.90   21.10
   9   6  15   24.30    7.00
  -9  -6 -15   29.90    7.70
  -9  -6 -15   47.70   26.20
  -9  -6 -15   12.70    6.80
  10   5  15  189.38   67.99
  10   5  15  245.38   35.30
  10   5  15  279.57   43.50
 -10  -5 -15  260.27   35.30
 -10  -5 -15  198.68   35.20
  11   4  15  312.57   43.60
  11   4  15  219.18   50.59
  11   4  15  326.07   43.60
 -11  -4 -15  282.07   43.60
 -11  -4 -15  287.27   43.50
 -11  -4 -15  301.77   53.09
  12   3  15  146.29   21.00
 -12  -3 -15  121.69   21.70
 -12  -3 -15  203.28   33.90
  13   2  15   88.59   28.10
  13   2  15   73.79   12.30
 -13  -2 -15  110.49   27.70
 -13  -2 -15   76.99   14.00
 -13  -2 -15   77.89   14.20
  14   1  15  -30.50   29.70
  14   1  15    6.70    6.20
  14   1  15    4.80    4.00
 -14  -1 -15   -9.00   25.50
 -14  -1 -15    5.20    6.20
 -14  -1 -15    5.10    7.30
  15   0  15    1.80   29.80
  15   0  15   -2.30    3.70
 -15   0 -15   11.70   25.50
 -15   0 -15  -10.60    9.00
 -15   0 -15   -3.00    5.60
  16  -1  15   -5.80    7.30
  16  -1  15   -3.70    3.90
  16  -1  15  -23.00   39.20
 -16   1 -15   24.30   30.20
 -16   1 -15    0.40   10.20
 -16   1 -15   -1.20    7.50
  17  -2  15   21.70    9.10
  17  -2  15   -6.50   43.80
 -17   2 -15   23.20    9.00
 -17   2 -15   19.40   11.20
 -17   2 -15   -1.00   34.40
  18  -3  15    4.30   54.79
  18  -3  15   52.69    9.90
  18  -3  15   45.90   13.90
 -18   3 -15   73.49   41.80
 -18   3 -15   52.29   16.20
 -18   3 -15   87.89   14.70
  19  -4  15  155.28   26.30
 -19   4 -15   75.79   49.30
  20  -5  15  111.79   21.00
 -20   5 -15   60.69   14.60
  21  -6  15  124.89   25.90
  22  -7  15   64.49   25.50
  23  -8  15   46.90   41.20
   2 -18 -16  -13.40   38.70
   1 -17 -16   12.50   29.30
   0 -16 -16   -5.70   25.70
   1  15  16   27.40   17.90
  -1 -15 -16   36.80   23.50
   2  14  16   12.00    5.70
   2  14  16   50.39   60.19
   2  14  16   -6.70   10.80
  -2 -14 -16  -30.50   19.20
   3  13  16   24.90    9.10
   3  13  16   -8.90    5.30
  -3 -13 -16    4.20   15.40
  -3 -13 -16  -41.60   65.39
  -3 -13 -16    3.50   18.50
   4  12  16    0.00    4.20
   4  12  16    6.30    8.00
   4  12  16   -7.10   41.50
  -4 -12 -16   -4.90   13.30
  -4 -12 -16   22.50    8.90
  -4 -12 -16  -10.90   57.59
   5  11  16   27.10    9.30
   5  11  16   26.30    5.50
   5  11  16   50.79   36.40
  -5 -11 -16   -1.30   49.99
  -5 -11 -16   30.00   10.30
  -5 -11 -16   13.50   12.80
   6  10  16   78.19   12.50
   6  10  16  105.59   17.00
   6  10  16   95.49   16.20
   6  10  16   56.19   32.90
  -6 -10 -16   93.89   44.50
  -6 -10 -16   65.59   14.30
  -6 -10 -16   86.99   16.70
   7   9  16   96.89   22.40
   7   9  16  171.68   37.60
   7   9  16  154.08   19.70
  -7  -9 -16  189.58   45.80
  -7  -9 -16  122.69   22.40
  -7  -9 -16  113.59   21.70
   8   8  16  248.38   36.40
   8   8  16  225.58   35.50
   8   8  16  251.57   36.70
   8   8  16  244.88   49.50
  -8  -8 -16  250.77   37.50
  -8  -8 -16  276.97   53.69
   9   7  16  169.08   34.90
   9   7  16  108.09   20.00
  -9  -7 -16  131.89   36.80
  -9  -7 -16  120.59   20.20
  -9  -7 -16  124.79   19.50
  10   6  16  139.59   21.50
  10   6  16   87.39   32.10
 -10  -6 -16  179.78   38.10
 -10  -6 -16  158.98   21.70
 -10  -6 -16  112.69   21.10
  11   5  16    8.60    6.90
  11   5  16   12.00    7.20
  11   5  16    6.50   23.50
 -11  -5 -16   50.79   33.90
 -11  -5 -16    2.70    6.80
 -11  -5 -16    7.50    6.80
  12   4  16   22.10   24.90
  12   4  16  -13.90    6.50
  12   4  16  -84.59   55.89
 -12  -4 -16    5.40    7.20
 -12  -4 -16   -1.60    6.30
 -12  -4 -16   10.40   23.50
  13   3  16  -10.30   54.89
  13   3  16   -2.70    3.80
  13   3  16  -15.50    6.70
  13   3  16    5.30   24.10
 -13  -3 -16  -15.20   23.80
 -13  -3 -16   -5.30    5.80
 -13  -3 -16    2.50    7.10
  14   2  16    2.70    4.00
  14   2  16   -3.50    8.00
  14   2  16   15.60   30.40
 -14  -2 -16   16.30   26.60
 -14  -2 -16   -1.30    7.40
 -14  -2 -16   -5.50    6.30
  15   1  16   37.20    8.60
  15   1  16   25.50    6.30
  15   1  16    9.10   31.20
 -15  -1 -16    6.20   28.10
 -15  -1 -16   37.50   10.20
  16   0  16   34.20    7.30
  16   0  16   54.49   41.10
  16   0  16   50.49   10.10
 -16   0 -16   25.90   11.30
 -16   0 -16   53.09   32.00
 -16   0 -16   26.30    9.40
  17  -1  16   86.29   51.79
  17  -1  16  107.89   18.40
  17  -1  16   99.09   16.30
 -17   1 -16  108.79   18.80
 -17   1 -16   95.89   20.20
 -17   1 -16  134.89   43.80
  18  -2  16   59.99   11.10
  18  -2  16   74.79   14.60
  18  -2  16   47.00   62.39
 -18   2 -16   90.09   40.80
 -18   2 -16   44.60   15.60
  19  -3  16   28.50   11.50
 -19   3 -16   -1.90   12.90
 -19   3 -16   18.20   16.20
 -19   3 -16    8.20   45.40
  20  -4  16   13.90   14.70
 -20   4 -16    6.30   14.20
  21  -5  16   43.50   18.00
  22  -6  16   64.59   21.20
  23  -7  16   80.39   28.40
   1 -18 -17  -31.90   36.10
   0 -17 -17  -32.40   32.80
  -1 -16 -17  -18.00   27.60
   2  15  17   17.70    7.00
  -2 -15 -17   -7.80   23.40
   3  14  17   15.10   11.70
   3  14  17   39.70   13.40
  -3 -14 -17   62.19   22.20
   4  13  17   56.99   56.19
  -4 -13 -17   73.39   74.69
  -4 -13 -17   78.39   22.00
  -4 -13 -17   27.10   19.30
   5  12  17   52.29   46.80
   5  12  17   91.49   13.80
  -5 -12 -17   69.09   20.40
   6  11  17   81.59   12.80
   6  11  17  120.99   43.40
  -6 -11 -17   59.59   15.80
  -6 -11 -17   98.59   17.80
   7  10  17   70.39   36.50
   7  10  17   38.20   14.10
   7  10  17   63.19   10.50
  -7 -10 -17   51.99   46.20
  -7 -10 -17   99.69   15.90
  -7 -10 -17   69.79   13.10
   8   9  17   78.09   32.40
   8   9  17   20.50    8.60
   8   9  17   17.80    4.30
  -8  -9 -17   32.60   41.90
  -8  -9 -17   33.00   10.40
  -8  -9 -17   11.60    8.40
   9   8  17   -5.90    3.00
   9   8  17    7.60    9.00
   9   8  17   11.80    7.10
   9   8  17  -11.80   29.20
  -9  -8 -17    0.80    8.30
  -9  -8 -17   -8.00   15.00
  -9  -8 -17   10.40   34.50
  10   7  17    2.60    8.20
  10   7  17   33.70   27.00
  10   7  17    4.30    6.90
 -10  -7 -17  -36.50   31.60
 -10  -7 -17    2.20    8.40
 -10  -7 -17    1.00    7.40
  11   6  17  -10.80    7.90
  11   6  17  -14.20    6.80
 -11  -6 -17   26.20   33.60
 -11  -6 -17   17.60    8.30
 -11  -6 -17   -2.10    7.40
  12   5  17   82.29   29.30
  12   5  17   75.19   13.40
 -12  -5 -17   76.39   12.90
 -12  -5 -17   20.00   33.20
 -12  -5 -17   57.99   13.30
  13   4  17   46.40    9.10
  13   4  17   23.30   27.00
 -13  -4 -17   74.29   11.80
 -13  -4 -17   69.59   30.90
  14   3  17   75.79   13.20
  14   3  17   90.39   15.10
  14   3  17  125.99   33.50
 -14  -3 -17   69.49   15.30
 -14  -3 -17  109.39   33.90
  15   2  17   88.09   36.70
  15   2  17   55.49   10.90
 -15  -2 -17   66.79   31.30
 -15  -2 -17   83.99   13.50
 -15  -2 -17   59.49   14.20
  16   1  17  -16.90    8.50
  16   1  17    0.00    5.60
  16   1  17   39.00   38.80
 -16  -1 -17   12.20    8.00
 -16  -1 -17  -72.89   30.40
 -16  -1 -17   16.30   10.20
  17   0  17   -1.40    4.60
  17   0  17   -3.70    8.30
  17   0  17   13.80   43.80
 -17   0 -17   12.90   36.60
 -17   0 -17    9.50    9.70
 -17   0 -17    4.90   13.70
  18  -1  17   41.50   11.20
  18  -1  17    1.50   55.39
  18  -1  17   13.00    6.30
 -18   1 -17   84.89   38.80
 -18   1 -17   14.20   12.40
 -18   1 -17   24.80   10.70
  19  -2  17   71.19   16.50
 -19   2 -17   50.09   19.80
 -19   2 -17   99.29   17.10
 -19   2 -17   65.29   46.60
  20  -3  17   39.30   14.80
 -20   3 -17   14.40   15.30
  21  -4  17   47.90   17.00
 -21   4 -17   17.30   17.40
  22  -5  17   37.50   19.30
 -22   5 -17   20.00   19.70
  23  -6  17   38.40   24.70
 -23   6 -17   -7.10   22.30
  -1 -17 -18    9.40   32.40
  -2 -16 -18  114.89   34.80
   3  15  18   23.60    8.80
  -3 -15 -18   51.49   26.10
   4  14  18   27.60    8.10
  -4 -14 -18   44.80   21.60
   5  13  18   32.70    6.80
   5  13  18   27.70   56.69
  -5 -13 -18   12.30   21.90
  -5 -13 -18  -65.39   82.09
  -5 -13 -18  -15.30   19.20
   6  12  18   21.50   10.20
   6  12  18   -4.90    4.90
  -6 -12 -18  -16.40   68.29
  -6 -12 -18  -16.80   16.40
   7  11  18    0.60    4.90
   7  11  18   27.20    9.40
   7  11  18   18.30   40.80
  -7 -11 -18  -25.50   60.99
  -7 -11 -18   27.50   11.20
  -7 -11 -18   -9.40   14.70
   8  10  18   -0.60    4.30
   8  10  18  -17.50   36.10
   8  10  18    9.60    8.50
  -8 -10 -18    9.30   11.10
  -8 -10 -18  -35.20   48.70
  -8 -10 -18   11.70    9.60
   9   9  18   -4.80    9.90
   9   9  18   18.50   35.70
   9   9  18    4.80    8.70
  -9  -9 -18   20.70    9.90
  -9  -9 -18   10.80   11.40
  -9  -9 -18   14.00   44.10
  10   8  18   13.00    8.40
  10   8  18   48.60   31.40
  10   8  18   10.80    9.90
 -10  -8 -18  -11.90   42.20
 -10  -8 -18   25.70    9.90
 -10  -8 -18    4.60    9.70
  11   7  18    5.70   10.20
  11   7  18    1.50   29.60
  11   7  18   24.70    9.10
 -11  -7 -18   30.20   10.10
 -11  -7 -18   26.80    9.80
 -11  -7 -18   45.10   37.30
  12   6  18   52.09   11.30
  12   6  18   32.10   30.90
 -12  -6 -18   25.70   10.10
 -12  -6 -18   26.90   10.40
 -12  -6 -18  108.79   36.50
  13   5  18   14.00   30.10
  13   5  18   23.70    8.70
 -13  -5 -18   16.60    9.50
 -13  -5 -18   23.00    9.60
 -13  -5 -18   77.19   35.80
  14   4  18   32.10   32.30
  14   4  18   -0.10    4.80
  14   4  18    6.70    8.50
 -14  -4 -18   -4.80    7.70
 -14  -4 -18   20.60    9.70
 -14  -4 -18    1.90   32.10
  15   3  18   12.00    5.70
 -15  -3 -18   26.80   10.50
 -15  -3 -18   21.20    9.30
 -15  -3 -18   49.40   34.70
  16   2  18   60.89   10.30
 -16  -2 -18   38.20   18.90
 -16  -2 -18   62.59   33.40
  17   1  18  105.89   17.30
  17   1  18   73.79   14.90
 -17  -1 -18  109.59   18.00
 -17  -1 -18   87.89   19.00
 -17  -1 -18   68.79   40.30
  18   0  18   34.60   51.99
  18   0  18   42.40    9.90
 -18   0 -18   82.69   17.00
 -18   0 -18   52.49   39.80
  19  -1  18    6.70   81.69
  19  -1  18   44.00   13.90
 -19   1 -18   28.80   13.00
 -19   1 -18    6.90   49.40
  20  -2  18   20.10   14.40
 -20   2 -18   -5.90   13.30
  21  -3  18   10.30   15.70
 -21   3 -18    9.60   16.70
  22  -4  18   36.70   16.70
 -22   4 -18  -38.60   18.10
  23  -5  18   31.20   21.20
 -23   5 -18   -1.30   23.30
  -1 -18 -19  -53.79   41.70
  -2 -17 -19   29.40   34.10
  -3 -16 -19  -12.70   29.00
  -4 -15 -19  -22.20   26.20
   5  14  19   21.40    7.80
  -5 -14 -19   19.20   23.70
   6  13  19    6.40    7.20
   6  13  19    9.60   11.90
   6  13  19   92.39   69.89
  -6 -13 -19  -11.90   19.30
   7  12  19   34.40   54.49
  -7 -12 -19   38.20   76.39
   8  11  19  -56.29   45.70
   8  11  19   -6.40   10.10
   8  11  19   10.90    4.70
  -8 -11 -19    4.30   15.00
  -8 -11 -19  -69.39   61.09
   9  10  19   64.79   43.60
   9  10  19  -16.50   10.20
   9  10  19   -5.90    4.10
  -9 -10 -19   -0.60   12.90
  -9 -10 -19   13.30   11.30
  -9 -10 -19  -35.50   57.49
  10   9  19   24.30   10.20
  10   9  19  -32.80   38.50
  10   9  19    5.40    4.30
 -10  -9 -19   24.80   46.40
 -10  -9 -19   17.80   11.40
 -10  -9 -19   11.80   12.30
  11   8  19   14.30    9.70
  11   8  19  -22.20   36.10
 -11  -8 -19   10.30   10.60
 -11  -8 -19   21.00   11.40
 -11  -8 -19  -22.50   44.20
  12   7  19    9.40   11.00
  12   7  19    2.30   34.70
  12   7  19    8.00   10.10
 -12  -7 -19   -4.50   39.30
  13   6  19   59.79   12.20
  13   6  19   37.30   11.60
  13   6  19   34.00   36.80
 -13  -6 -19   32.00   11.50
 -13  -6 -19  109.49   43.20
 -13  -6 -19   38.80   12.30
  14   5  19   50.89   34.50
  14   5  19   43.60    8.90
 -14  -5 -19   42.20   38.60
  15   4  19   40.20   10.30
  15   4  19  110.39   41.60
 -15  -4 -19   58.59   16.30
 -15  -4 -19   37.60   36.40
 -15  -4 -19   80.49   12.90
  16   3  19   49.90   10.20
  16   3  19   82.79   41.80
 -16  -3 -19   63.19   12.70
 -16  -3 -19   83.39   40.60
 -16  -3 -19   40.10   14.60
  17   2  19   49.80   43.00
  17   2  19   45.60   11.90
 -17  -2 -19   14.80   11.70
 -17  -2 -19  101.89   41.60
 -17  -2 -19   32.80   14.30
  18   1  19   40.80   52.19
 -18  -1 -19    6.50   11.20
 -18  -1 -19   67.29   43.00
 -18  -1 -19   28.30   14.70
  19   0  19   14.00   11.90
 -19   0 -19   -4.80   48.80
 -19   0 -19    1.90   11.60
  20  -1  19    7.80   13.40
 -20   1 -19   25.00   14.70
  21  -2  19   16.70   15.50
 -21   2 -19   11.40   16.10
  22  -3  19   37.50   16.40
 -22   3 -19   33.20   23.50
  23  -4  19   99.39   24.30
 -23   4 -19   34.70   25.00
  -3 -17 -20   21.00   34.10
  -4 -16 -20   28.80   32.10
  -5 -15 -20  -16.20   27.50
   6  14  20   10.70    8.50
  -6 -14 -20   -1.50   23.90
   7  13  20   -2.20    6.80
   7  13  20   20.50   12.80
   8  12  20  -27.10   58.69
   8  12  20    8.80    6.20
   8  12  20    2.90   12.30
  -8 -12 -20  -24.40   17.60
   9  11  20    1.60    5.00
   9  11  20   19.50   12.60
   9  11  20   25.30   52.49
  -9 -11 -20  -13.30   15.50
  -9 -11 -20 -127.79   68.59
  10  10  20   54.49   50.59
  10  10  20   63.69   10.50
 -10 -10 -20   48.70   66.69
 -10 -10 -20   63.39   17.50
  11   9  20  111.49   17.10
  11   9  20  152.78   49.10
 -11  -9 -20   84.49   54.49
 -11  -9 -20  108.69   22.10
  12   8  20  183.78   47.40
 -12  -8 -20   74.69   55.69
 -12  -8 -20  137.29   22.00
 -12  -8 -20   81.79   19.60
  13   7  20  146.99   45.70
 -13  -7 -20  131.09   20.90
 -13  -7 -20   77.39   18.80
 -13  -7 -20   75.69   51.79
  14   6  20   87.59   39.80
  14   6  20   32.70   12.10
 -14  -6 -20   62.19   47.30
 -14  -6 -20   57.69   13.50
 -14  -6 -20   33.70   13.70
  15   5  20   16.10   41.50
  15   5  20   35.30   11.30
 -15  -5 -20  -13.80   42.30
 -15  -5 -20   14.80   12.30
 -15  -5 -20   16.00   11.70
  16   4  20    0.90   10.40
  16   4  20  -11.70   42.90
 -16  -4 -20    6.80   11.10
 -16  -4 -20    3.70   13.80
 -16  -4 -20   -9.80   43.00
  17   3  20   12.60   11.30
  17   3  20   14.20   46.20
 -17  -3 -20    0.10   10.20
 -17  -3 -20   18.30   14.10
 -17  -3 -20    0.50   44.20
  18   2  20   51.69   51.39
  18   2  20    6.60   12.30
 -18  -2 -20   10.80   46.10
 -18  -2 -20   16.00   12.20
  19   1  20   32.90   13.90
 -19  -1 -20    8.30   49.50
 -19  -1 -20   27.10   13.30
  20   0  20   44.50   15.10
 -20   0 -20   39.10   15.40
 -21   1 -20   49.10   18.70
  22  -2  20   74.49   18.60
 -22   2 -20   25.90   20.10
  23  -3  20   25.00   21.10
 -23   3 -20   -9.40   23.00
  -5 -16 -21  -44.50   29.20
  -6 -15 -21    3.80   26.50
  -7 -14 -21  -10.00   18.90
   8  13  21   49.99   10.40
   9  12  21   61.69   15.00
   9  12  21   90.79   18.00
  10  11  21   63.29   11.40
  10  11  21   55.89   61.69
 -10 -11 -21   84.39   20.40
 -10 -11 -21  144.29   85.29
  11  10  21  -47.30   55.09
 -11 -10 -21  -21.90   69.39
  12   9  21   -0.30   48.10
  12   9  21   46.00   14.00
  12   9  21   15.50    5.60
 -12  -9 -21   12.20   15.10
 -12  -9 -21   32.20   61.99
  13   8  21   26.30   47.20
  13   8  21   10.30   11.40
 -13  -8 -21   17.40   55.39
 -13  -8 -21    0.50   13.10
 -13  -8 -21   19.00   15.90
  14   7  21   10.00   47.20
  14   7  21    3.70   11.90
 -14  -7 -21    7.40   13.50
 -14  -7 -21   25.60   15.10
 -14  -7 -21  -43.70   49.99
  15   6  21    3.40   11.70
  15   6  21   18.10   50.69
 -15  -6 -21   10.40   48.70
 -15  -6 -21    2.20   12.80
 -15  -6 -21   15.60   14.60
  16   5  21   41.80   50.79
  16   5  21    5.40   11.90
 -16  -5 -21  -24.80   49.30
 -16  -5 -21   -1.50   12.60
  17   4  21   23.60   13.10
  17   4  21   10.60   53.59
 -17  -4 -21   36.80   50.19
 -17  -4 -21   29.20   12.60
  18   3  21   34.10   56.29
 -18  -3 -21  -29.90   52.49
 -18  -3 -21   45.80   14.90
 -19  -2 -21   22.60   86.29
 -19  -2 -21   24.70   14.30
  20   1  21   32.70   17.50
 -20  -1 -21   17.30   16.10
  21   0  21   17.40   15.70
 -21   0 -21   14.70   16.30
  22  -1  21   55.19   18.50
 -22   1 -21   10.10   19.30
  23  -2  21   44.00   23.50
 -23   2 -21   36.40   24.10
  -5 -17 -22  -22.00   37.30
  -6 -16 -22    6.20   34.70
  -7 -15 -22   18.10   30.70
  -8 -14 -22   26.40   26.70
   9  13  22   11.80    8.40
  10  12  22    1.80    6.90
  11  11  22   27.70   14.20
  11  11  22   -4.70    6.60
  12  10  22    2.70   13.40
  12  10  22   -5.90    5.20
  12  10  22  -10.30   62.19
 -12 -10 -22   32.80   85.19
 -12 -10 -22   -6.20   16.80
  13   9  22   -1.70    5.70
  13   9  22   -6.20   13.70
  13   9  22   -3.20   59.79
 -13  -9 -22  -37.80   69.59
 -13  -9 -22    0.10   15.90
 -14  -8 -22  -57.59   64.89
 -14  -8 -22   13.00   14.90
  15   7  22   32.70   54.29
  15   7  22   10.50   13.20
 -15  -7 -22   32.50   73.79
 -15  -7 -22   17.70   15.20
  16   6  22   12.60   12.80
  16   6  22  -32.10   55.09
 -16  -6 -22   15.80   14.30
 -16  -6 -22    1.30   62.19
  17   5  22  -17.60   72.09
  17   5  22   28.30   14.20
 -17  -5 -22   11.60   13.10
 -17  -5 -22  -63.69   58.79
  18   4  22   10.30   14.00
 -18  -4 -22   27.80   15.00
 -18  -4 -22  -35.10   59.19
  19   3  22  106.69   31.60
  20   2  22   84.29   19.00
 -20  -2 -22   63.89   19.80
  21   1  22   80.79   19.70
  22   0  22   68.19   17.80
 -22   0 -22    5.60   21.50
 -23   1 -22    2.10   21.40
  -7 -16 -23  -10.10   34.30
  -8 -15 -23  -14.90   30.70
  -9 -14 -23  -12.70   27.40
  11  12  23    7.00    8.00
  12  11  23   -5.80    6.60
  13  10  23  -14.20    6.50
  13  10  23    3.10   15.10
  14   9  23   40.60   15.50
 -14  -9 -23    0.00   18.20
  15   8  23   10.50   15.00
 -15  -8 -23   31.70   15.80
 -15  -8 -23   -2.40   74.49
  16   7  23   38.00   14.90
 -16  -7 -23   -3.50   70.89
 -16  -7 -23    3.40   16.10
  17   6  23   94.29   19.80
 -17  -6 -23   69.09   20.60
  18   5  23  112.49   22.40
  19   4  23  135.19   25.10
  20   3  23   86.59   20.60
  21   2  23   61.09   19.80
 -21  -2 -23   43.40   21.10
 -22  -1 -23   21.50   19.50
 -23   0 -23   -0.20   21.50
  -8 -16 -24    5.00   38.20
 -10 -14 -24  -25.70   28.50
  13  11  24    5.90    8.20
  14  10  24    0.10    6.70
  16   8  24   93.69   28.80
  17   7  24   97.09   22.10
  18   6  24   61.59   18.70
 -18  -6 -24   64.89   34.10
  19   5  24   24.10   16.10
 -19  -5 -24   32.70   18.00
  20   4  24    0.70   23.70
 -20  -4 -24   13.80   18.10
 -21  -3 -24    0.10   19.10
 -22  -2 -24   10.00   21.60
 -10 -15 -25   55.49   36.30
 -18  -7 -25   55.09   25.70
 -19  -6 -25   28.10   23.10
 -20  -5 -25   35.60   23.40
 -21  -4 -25   23.60   23.00
 -12 -14 -26   20.00   34.00
 -13 -13 -28   20.90   31.30
 -11 -14 -27   19.60   32.30
 -21  -3 -26   36.10   25.00
 -20  -4 -26   47.10   29.30
 -19  -5 -26   18.70   20.90
 -11 -13 -26    3.30   29.10
  -9 -15 -26   10.70   36.60
 -22  -1 -25   33.30   24.90
 -21  -2 -25   30.20   20.00
 -20  -3 -25    5.50   20.00
 -19  -4 -25   13.50   22.10
  19   4  25   34.50   17.40
 -18  -5 -25   58.19   22.90
  18   5  25   53.89   18.30
 -17  -6 -25   35.90   18.90
  17   6  25   47.20   17.70
 -16  -7 -25   13.70   19.10
  16   7  25   59.59   17.00
  15   8  25   50.79   20.80
  14   9  25   22.30    7.00
  13  10  25   24.20    8.20
 -10 -13 -25   27.10   27.40
  -9 -14 -25  -39.70   28.30
  -8 -15 -25  -12.20   37.10
  -7 -16 -25   23.10   37.20
 -22   0 -24    7.90   21.20
 -21  -1 -24   36.00   19.00
  21   1  24   34.40   20.70
  20   2  24   45.10   19.10
 -19  -3 -24   15.20   18.20
  19   3  24   32.20   15.80
 -18  -4 -24   18.60   17.20
  18   4  24   12.90   14.90
 -17  -5 -24   19.60   14.80
 -17  -5 -24  -58.49   67.79
  17   5  24   29.40   15.70
 -16  -6 -24   85.99   69.09
 -16  -6 -24   36.40   17.00
  16   6  24   29.10   15.10
 -15  -7 -24   25.80   69.49
  15   7  24  -24.20   66.59
 -14  -8 -24   31.00   17.40
 -14  -8 -24   95.89  111.99
  14   8  24   61.79   17.70
  14   8  24   85.99   66.79
  13   9  24   29.80   77.89
  13   9  24   56.59   17.20
  13   9  24   17.20    7.20
  12  10  24   17.70   16.60
  11  11  24    4.30    7.20
  -9 -13 -24  -17.50   25.90
  -8 -14 -24   29.60   29.30
  -7 -15 -24  -30.20   29.20
  -6 -16 -24  -13.80   36.00
 -22   1 -23   15.90   22.10
 -21   0 -23   13.60   19.90
  21   0  23   21.30   18.50
 -20  -1 -23   36.60   16.80
  20   1  23   19.40   14.70
 -19  -2 -23   44.40   17.60
  19   2  23   58.09   16.80
 -18  -3 -23  114.59   67.99
 -18  -3 -23  102.49   21.80
 -17  -4 -23  136.69   22.50
 -17  -4 -23   -9.40   64.29
  17   4  23   67.09   61.59
 -16  -5 -23   41.50   15.60
  16   5  23   30.10   55.39
 -15  -6 -23   64.99   70.09
 -15  -6 -23   14.00   14.90
  15   6  23   50.49   15.00
  15   6  23   48.80   55.49
 -14  -7 -23   25.10   14.80
 -14  -7 -23   -4.30   62.89
  14   7  23    4.90   59.69
  14   7  23   18.30   14.00
 -13  -8 -23   -7.90   65.69
 -13  -8 -23   -0.20   15.50
  13   8  23  -45.00   57.49
 -12  -9 -23   24.10   16.60
 -12  -9 -23  -20.20   71.19
  12   9  23   -0.90   13.00
  12   9  23   -3.90    4.90
  12   9  23   18.20   58.09
  11  10  23    4.60   62.29
  11  10  23  -12.10    6.60
  11  10  23   38.60   14.40
  10  11  23   58.29   17.10
   9  12  23    1.20    7.40
  -8 -13 -23   20.50   23.90
  -7 -14 -23  -15.30   25.70
  -6 -15 -23    3.30   29.50
  -4 -17 -23   20.80   38.90
 -23   3 -22   10.20   27.70
 -22   2 -22   42.20   21.40
  22  -2  22   13.10   19.00
 -21   1 -22   86.39   37.30
  21  -1  22   90.29   21.40
 -20   0 -22  102.49   22.90
  20   0  22  114.49   22.90
 -19  -1 -22  153.28   30.20
  19   1  22  206.18   32.80
 -18  -2 -22   30.80   53.49
 -18  -2 -22   60.49   16.80
  18   2  22  117.29   65.09
  18   2  22   55.59   15.80
 -17  -3 -22    0.00   51.19
 -17  -3 -22    1.00   11.90
  17   3  22   24.10   52.39
 -16  -4 -22   22.60   13.10
 -16  -4 -22   11.10   47.40
 -16  -4 -22   25.80   15.40
  16   4  22   29.80   12.20
  16   4  22  -28.70   50.29
 -15  -5 -22   28.10   13.10
 -15  -5 -22   37.50   16.80
 -15  -5 -22    7.60   49.30
  15   5  22    4.00   50.79
  15   5  22   31.20   13.40
 -14  -6 -22   14.90   13.70
 -14  -6 -22   -5.50   12.30
 -14  -6 -22   -2.60   51.19
  14   6  22    3.50   12.50
  14   6  22  -15.70   49.00
 -13  -7 -22  -15.20   53.29
 -13  -7 -22   25.30   14.10
 -13  -7 -22   34.70   13.90
  13   7  22  -32.30   47.00
  13   7  22   38.10   13.50
 -12  -8 -22  -39.00   91.19
 -12  -8 -22   43.50   15.80
  12   8  22   45.50   49.50
  12   8  22   67.39   14.90
 -11  -9 -22   63.19   63.49
 -11  -9 -22   13.20   15.70
  11   9  22   94.29   15.40
  11   9  22   53.09    9.30
 -10 -10 -22   -5.70   16.40
 -10 -10 -22   31.20   71.89
  10  10  22   28.50   54.69
  10  10  22   37.40    7.30
   9  11  22  -11.80   61.49
   9  11  22    6.00    5.90
   9  11  22   35.30   13.60
   8  12  22    2.20    6.20
   8  12  22    7.30   13.60
  -7 -13 -22   11.00   22.60
  -6 -14 -22   32.60   20.40
  -5 -15 -22   12.30   28.80
  -4 -16 -22   13.80   32.60
  -3 -17 -22   20.40   36.80
 -23   4 -21   49.10   28.90
 -22   3 -21   10.30   20.40
  22  -3  21   52.39   19.70
  21  -2  21   86.39   22.50
 -20   1 -21   32.30   17.30
  20  -1  21   32.30   16.30
 -19   0 -21   42.90   59.49
 -19   0 -21   21.50   13.30
  19   0  21    8.30   14.30
 -18  -1 -21   41.70   47.70
 -18  -1 -21    9.70   13.40
  18   1  21   20.10   13.10
  18   1  21   74.89   61.69
 -17  -2 -21   21.40   12.30
 -17  -2 -21    3.90   43.40
 -17  -2 -21   -0.20   15.60
  17   2  21   57.79   50.99
  17   2  21   34.60   11.80
 -16  -3 -21   17.50   15.10
 -16  -3 -21   -8.10   40.30
 -16  -3 -21    2.90   10.60
  16   3  21  -25.80   46.20
  16   3  21    3.50   11.80
 -15  -4 -21    2.10   12.30
 -15  -4 -21  -14.50    9.90
 -15  -4 -21  -24.00   41.00
  15   4  21  -44.30   40.80
  15   4  21    3.10   10.50
 -14  -5 -21    7.50   12.40
 -14  -5 -21  -11.70   43.80
 -14  -5 -21   -4.30   10.00
  14   5  21   -9.20   40.90
  14   5  21   16.10   10.60
 -13  -6 -21   46.50   45.60
 -13  -6 -21   31.70   13.80
 -13  -6 -21   50.79   13.10
  13   6  21   28.80   39.30
  13   6  21   31.60   11.90
 -12  -7 -21    7.90   10.60
 -12  -7 -21    2.90   45.20
 -12  -7 -21   10.60   12.10
  12   7  21    4.70   10.00
  12   7  21    2.70   39.50
 -11  -8 -21   -5.20   12.40
 -11  -8 -21   15.80   11.90
 -11  -8 -21   68.09   51.79
  11   8  21   18.80   40.20
  11   8  21    5.50   10.50
 -10  -9 -21   18.10   85.49
 -10  -9 -21   20.90   13.70
  10   9  21    1.90   42.40
  10   9  21    7.70    4.70
  10   9  21   54.09   11.90
  -9 -10 -21   33.80   66.69
  -9 -10 -21   81.59   18.30
   9  10  21   59.89   10.80
  -8 -11 -21   -4.70   72.09
  -8 -11 -21   29.50   20.00
   8  11  21   62.59   10.00
   8  11  21   45.70   54.59
   7  12  21   82.99   75.99
   7  12  21   96.79   20.10
  -6 -13 -21    1.40   22.00
   6  13  21   15.70   13.40
   6  13  21    4.80    6.70
  -5 -14 -21   -0.70   25.00
   5  14  21   -0.90    8.70
  -4 -15 -21   18.60   27.70
  -3 -16 -21   13.50   32.00
 -22   4 -20    2.20   19.70
  22  -4  20   49.50   19.40
 -21   3 -20    8.20   18.00
  21  -3  20   35.60   18.30
 -20   2 -20   31.80   15.60
  20  -2  20   51.99   16.00
 -19   1 -20   69.49   52.29
 -19   1 -20   18.10   13.60
  19  -1  20   28.80   13.20
 -18   0 -20  -15.60   44.40
 -18   0 -20    4.70   16.20
 -18   0 -20   10.90   12.40
  18   0  20   50.19   63.39
  18   0  20   18.70   12.40
 -17  -1 -20    4.10   10.50
 -17  -1 -20    0.30   14.20
 -17  -1 -20  -16.90   41.80
  17   1  20   19.70   47.60
  17   1  20    2.30   10.60
 -16  -2 -20    7.00   13.80
 -16  -2 -20   -7.60   36.30
 -16  -2 -20    4.90    9.30
  16   2  20   -0.50   10.10
  16   2  20   -2.60    5.80
  16   2  20  -28.80   40.80
 -15  -3 -20   18.00    9.70
 -15  -3 -20   26.90   39.10
  15   3  20    7.30    6.10
  15   3  20   30.30   39.50
 -14  -4 -20   18.60   12.10
 -14  -4 -20   18.50    9.40
 -14  -4 -20   -1.30   36.60
  14   4  20   60.59   39.20
  14   4  20   19.10    6.50
  14   4  20   10.30    9.40
 -13  -5 -20   62.29   40.60
 -13  -5 -20   52.59   11.00
 -13  -5 -20   28.20   11.80
  13   5  20  -13.40   33.80
  13   5  20   27.20    7.60
  13   5  20   48.80   11.00
 -12  -6 -20  112.89   20.20
 -12  -6 -20   79.09   19.20
 -12  -6 -20  199.78   45.60
  12   6  20  111.59   39.90
  12   6  20  128.39   20.10
 -11  -7 -20   78.09   49.00
 -11  -7 -20  161.98   26.90
  11   7  20  152.08   42.50
  11   7  20  163.08   26.20
 -10  -8 -20   70.69   17.80
 -10  -8 -20   97.09   17.70
 -10  -8 -20  121.99   51.29
  10   8  20  158.78   40.70
  -9  -9 -20  109.19   50.69
  -9  -9 -20   48.20   15.10
   9   9  20   58.79    9.90
   9   9  20   79.49   39.40
  -8 -10 -20   -3.60   14.10
  -8 -10 -20   38.20   63.49
   8  10  20  -23.70   42.20
   8  10  20   38.80   11.40
  -7 -11 -20  -38.00   14.70
  -7 -11 -20    4.90   66.79
   7  11  20   -5.90    5.10
   7  11  20    3.10   10.70
  -6 -12 -20  -19.30   76.99
  -6 -12 -20  -26.30   17.20
   6  12  20   50.19   53.49
   6  12  20   -1.00    5.40
  -5 -13 -20  -12.50   20.80
   5  13  20   -3.10    6.10
   5  13  20   -6.40   11.80
  -4 -14 -20   23.00   24.00
   4  14  20   -3.10    7.10
  -3 -15 -20  -30.40   26.70
  -2 -16 -20   -3.00   30.60
  -1 -17 -20  -38.00   33.70
   0 -18 -20  -19.70   40.50
 -22   5 -19    8.60   21.60
  22  -5  19   45.20   21.30
 -21   4 -19   24.70   20.00
  21  -4  19   19.50   18.60
 -20   3 -19    1.40   14.70
  20  -3  19    2.70   13.60
 -19   2 -19    8.00   12.80
 -19   2 -19   60.49   55.29
  19  -2  19    0.10   12.60
 -18   1 -19  -11.20   11.00
 -18   1 -19   31.70   46.90
 -18   1 -19    3.70   15.10
  18  -1  19  -15.10   63.29
  18  -1  19    3.60   11.40
 -17   0 -19   37.00   39.80
 -17   0 -19    5.10   13.10
 -17   0 -19   -5.80    9.80
  17   0  19    0.50    5.80
  17   0  19   19.60   44.60
  17   0  19  -10.00    9.40
 -16  -1 -19   49.40   11.80
 -16  -1 -19   32.00   37.80
  16   1  19   42.10   42.90
 -15  -2 -19   44.90   15.10
 -15  -2 -19   90.89   36.50
 -15  -2 -19   72.89   13.90
  15   2  19  128.09   41.60
  15   2  19   65.39   12.30
  15   2  19   92.29   14.70
 -14  -3 -19  229.88   45.60
 -14  -3 -19  206.38   31.30
  14   3  19  179.78   28.50
 -13  -4 -19  243.28   37.30
 -13  -4 -19  204.88   37.80
 -13  -4 -19  275.37   51.69
  13   4  19  270.37   37.40
  13   4  19  241.78   50.69
 -12  -5 -19  175.88   30.80
 -12  -5 -19  220.18   47.80
  12   5  19  211.18   30.40
  12   5  19  164.38   43.70
 -11  -6 -19   83.39   15.40
 -11  -6 -19  119.39   39.10
  11   6  19   63.19   15.60
  11   6  19  127.39   35.30
 -10  -7 -19   21.00   11.30
 -10  -7 -19   24.20   38.20
 -10  -7 -19   10.10    8.70
  10   7  19   12.40    8.00
  10   7  19   17.90   28.70
  10   7  19    4.20    9.30
  -9  -8 -19    8.00    8.30
  -9  -8 -19  -10.10   39.20
  -9  -8 -19  -12.80   10.50
   9   8  19    3.40    8.00
   9   8  19   -6.50   32.80
   9   8  19    2.80    9.90
  -8  -9 -19   11.50    9.10
  -8  -9 -19   34.30   47.10
  -8  -9 -19   19.40   10.40
   8   9  19   33.90   35.00
   8   9  19   25.70    9.20
   8   9  19   10.80    4.20
   8   9  19   15.20    9.90
  -7 -10 -19   26.50   10.80
  -7 -10 -19   -9.40   12.00
  -7 -10 -19  -37.60   51.29
   7  10  19  -28.00   38.00
   7  10  19   17.60    9.60
   7  10  19   -7.20    3.80
  -6 -11 -19    4.10   15.10
   6  11  19   62.29   42.30
   6  11  19   26.80   11.00
  -5 -12 -19   17.60   17.10
  -5 -12 -19   13.40   14.10
  -5 -12 -19  -46.70   71.29
   5  12  19    8.80   50.19
  -4 -13 -19   45.80   17.50
   4  13  19   23.20    7.20
   4  13  19    4.60   57.29
  -3 -14 -19   27.10   21.60
   3  14  19   19.20    7.70
   3  14  19   20.30   12.60
  -2 -15 -19   48.70   26.60
  -1 -16 -19  -23.60   28.60
   0 -17 -19  -35.20   32.10
 -22   6 -18    6.00   21.50
  22  -6  18    1.50   21.20
 -21   5 -18  -30.10   31.10
  21  -5  18    4.90   17.20
 -20   4 -18    9.40   15.00
  20  -4  18   -6.00   14.40
 -19   3 -18   28.10   13.60
 -19   3 -18   18.90   64.29
  19  -3  18    1.10   13.20
 -18   2 -18   28.30   14.60
 -18   2 -18   32.80   12.20
 -18   2 -18   30.00   46.80
  18  -2  18  -31.30   67.19
  18  -2  18   14.60   12.90
 -17   1 -18   85.99   15.40
 -17   1 -18   81.59   43.10
 -17   1 -18   53.49   17.80
  17  -1  18   77.39   80.89
  17  -1  18   80.29   13.30
 -16   0 -18   72.09   14.80
 -16   0 -18  140.59   40.40
 -16   0 -18   61.59   17.50
  16   0  18   94.99   15.40
  16   0  18   72.19   13.30
  16   0  18  155.88   45.40
 -15  -1 -18  207.18   42.80
 -15  -1 -18  155.48   25.90
 -15  -1 -18  141.19   26.80
  15   1  18  183.28   27.00
 -14  -2 -18  122.39   34.90
 -14  -2 -18   88.99   17.90
  14   2  18   65.19   38.40
  14   2  18  106.89   17.30
 -13  -3 -18   20.10    7.90
 -13  -3 -18   13.50   30.10
 -13  -3 -18   40.30   10.80
  13   3  18   39.60    9.70
  13   3  18   41.10   29.80
  13   3  18   23.30    6.10
 -12  -4 -18   -4.00    6.80
 -12  -4 -18    6.70    8.50
 -12  -4 -18  -17.90   27.30
  12   4  18    1.50    4.30
  12   4  18    3.80   26.30
  12   4  18    9.50    7.80
 -11  -5 -18   33.70    9.50
 -11  -5 -18   55.59   31.10
 -11  -5 -18   25.10    9.60
  11   5  18   48.10   10.30
 -10  -6 -18   18.50    9.90
 -10  -6 -18   90.99   34.50
  10   6  18   46.10    9.60
  10   6  18   24.90   27.20
  -9  -7 -18    2.60   33.50
  -9  -7 -18   -9.50    9.20
  -9  -7 -18    6.40    8.10
   9   7  18    2.40    7.20
   9   7  18   -0.90    7.50
   9   7  18   -0.40   26.20
  -8  -8 -18   16.70   10.20
  -8  -8 -18   14.90    8.00
  -8  -8 -18   35.50   36.70
   8   8  18   24.00    7.60
   8   8  18   -1.30    8.10
   8   8  18   10.00    3.70
   8   8  18   45.30   29.80
  -7  -9 -18    4.10   19.00
  -7  -9 -18   -6.60   39.20
  -7  -9 -18   22.30    9.00
   7   9  18   22.20    9.50
   7   9  18   33.60    5.40
   7   9  18   12.80   29.90
  -6 -10 -18    7.80   10.10
  -6 -10 -18   73.69   45.60
  -6 -10 -18   30.40   12.70
   6  10  18   21.70    5.10
   6  10  18   76.89   37.50
   6  10  18   20.30   10.50
  -5 -11 -18   29.20   12.90
  -5 -11 -18   41.50   56.49
  -5 -11 -18    9.10   13.50
   5  11  18   32.20    9.30
   5  11  18  -30.40   39.80
   5  11  18   12.00    5.20
  -4 -12 -18  -31.30   14.20
  -4 -12 -18  -12.60   64.09
  -4 -12 -18   -5.10   16.20
   4  12  18    8.30    4.70
   4  12  18   -7.10   67.99
   4  12  18   24.00    9.20
  -3 -13 -18   29.20   25.00
  -3 -13 -18   38.50   19.40
  -3 -13 -18   86.59   77.39
   3  13  18   34.20   15.90
   3  13  18  -15.00   53.79
  -2 -14 -18   64.49   20.00
   2  14  18   54.59   10.50
   2  14  18   60.39   14.40
  -1 -15 -18   37.30   25.90
   1  15  18   38.30    9.60
   0 -16 -18   23.70   29.30
   1 -17 -18   -9.70   30.60
   2 -18 -18   12.40   38.70
  22  -7  17   61.69   23.80
  21  -6  17   39.70   20.20
  20  -5  17   48.30   17.30
 -19   4 -17  152.48   25.30
  19  -4  17  115.79   24.30
 -18   3 -17   51.39   15.10
 -18   3 -17   21.30   41.20
  18  -3  17   -0.20   70.49
 -17   2 -17   86.39   40.60
 -17   2 -17  104.99   15.90
 -17   2 -17   48.80   17.90
  17  -2  17   85.29   13.20
  17  -2  17   65.29   15.50
  17  -2  17  -29.80   60.09
 -16   1 -17    3.50   11.40
 -16   1 -17   48.50   34.30
 -16   1 -17   -4.30    7.90
  16  -1  17  -34.00   44.00
  16  -1  17    5.30    4.90
  16  -1  17   -5.80    8.50
 -15   0 -17    3.00   10.10
 -15   0 -17   -0.10    7.80
  15   0  17    0.40    4.20
  15   0  17    3.20    7.60
  15   0  17   10.80   39.20
 -14  -1 -17   80.99   15.70
 -14  -1 -17   81.09   15.20
  14   1  17  128.99   36.00
  14   1  17   85.19   15.00
 -13  -2 -17   11.10    8.30
 -13  -2 -17   10.90   27.80
 -13  -2 -17    9.90    6.40
  13   2  17    3.10    4.10
  13   2  17   -0.20   10.00
  13   2  17   45.50   30.00
 -12  -3 -17   -4.00    5.80
 -12  -3 -17   -1.10    7.80
  12   3  17    3.80    4.00
  12   3  17    2.60   24.20
  12   3  17  -32.30   53.99
  12   3  17    3.10    6.90
 -11  -4 -17    5.10    6.20
 -11  -4 -17    0.20    6.60
 -11  -4 -17   -4.70   25.40
  11   4  17   -3.70    6.40
  11   4  17    4.90   24.00
 -10  -5 -17   13.20    7.50
 -10  -5 -17  -16.20   25.10
 -10  -5 -17   28.90    7.60
  10   5  17   -3.10   21.50
  10   5  17   22.10    7.40
  10   5  17   22.40    7.50
  -9  -6 -17   10.90    7.40
  -9  -6 -17   12.30    7.80
  -9  -6 -17  -10.30   27.70
   9   6  17   15.40    6.80
   9   6  17   49.30   23.40
  -8  -7 -17   20.80   29.00
  -8  -7 -17   -6.40    7.30
  -8  -7 -17   -1.20    7.20
   8   7  17   -3.80    5.80
   8   7  17   -1.80   24.10
   8   7  17    9.50    6.90
  -7  -8 -17   -5.30   34.00
  -7  -8 -17    5.70    8.10
  -7  -8 -17    5.70    6.50
   7   8  17  -21.00   25.50
   7   8  17    7.60    3.00
   7   8  17    8.40    7.20
  -6  -9 -17   54.49   12.90
  -6  -9 -17   44.40   10.40
  -6  -9 -17   32.30   37.50
   6   9  17   47.70   11.60
   6   9  17   44.50   31.60
   6   9  17   51.99    8.30
  -5 -10 -17  136.49   27.30
  -5 -10 -17  115.89   46.90
  -5 -10 -17   92.39   18.00
   5  10  17   91.39   15.20
   5  10  17  121.79   19.90
   5  10  17  141.69   37.00
  -4 -11 -17  116.49   54.99
  -4 -11 -17   99.59   16.20
   4  11  17  119.69   38.80
   4  11  17   75.99   13.30
  -3 -12 -17   41.30   19.50
  -3 -12 -17   41.70   17.40
   3  12  17   64.39   10.20
   3  12  17   69.69   42.30
  -2 -13 -17   34.00   71.29
  -2 -13 -17   52.99   19.50
  -2 -13 -17   10.30   16.90
   2  13  17   28.80    6.60
   2  13  17   14.30   49.60
  -1 -14 -17  -13.90   20.10
   1  14  17    1.40   11.90
   0 -15 -17   26.40   25.20
   1 -16 -17   -7.60   26.60
   2 -17 -17  -32.30   30.80
   3 -18 -17  -22.10   36.80
 -22   8 -16   47.20   18.90
  22  -8  16   41.60   24.60
 -21   7 -16   40.40   14.40
  21  -7  16   70.99   21.40
 -20   6 -16   32.90   12.60
  20  -6  16   28.20   18.10
 -19   5 -16   32.80   10.90
  19  -5  16   57.39   15.80
 -18   4 -16  -20.90   46.30
 -18   4 -16  -14.10   14.30
  18  -4  16   -5.70   60.09
  18  -4  16    6.20   12.10
 -17   3 -16   17.70   37.90
 -17   3 -16   12.90   12.40
 -17   3 -16   17.00   10.40
  17  -3  16    5.10   50.09
  17  -3  16   12.30   10.00
  17  -3  16   12.60    5.30
 -16   2 -16  100.49   32.30
 -16   2 -16   46.90   13.20
 -16   2 -16   50.89   12.20
  16  -2  16   49.70   42.60
  16  -2  16   54.79   11.70
  16  -2  16   48.30    9.30
 -15   1 -16   13.00   10.80
 -15   1 -16   61.99   30.80
  15  -1  16   56.09   38.50
  15  -1  16   22.00    5.10
  15  -1  16    8.90    7.50
 -14   0 -16   28.20    7.70
 -14   0 -16   41.80   26.80
 -14   0 -16   21.40    9.30
  14   0  16   54.89   34.70
  14   0  16   20.00    5.50
  14   0  16   24.60    7.70
 -13  -1 -16  -38.80   22.30
 -13  -1 -16    0.60    6.20
 -13  -1 -16    5.80    7.40
  13   1  16   13.60    6.30
  13   1  16    0.50    3.80
  13   1  16  -32.30   27.10
  13   1  16  -20.40   71.49
 -12  -2 -16   29.80   23.20
 -12  -2 -16    7.40    5.60
 -12  -2 -16   10.00    7.70
  12   2  16  -38.20   37.20
  12   2  16    7.30    3.90
  12   2  16    2.20   23.30
  12   2  16    1.50    6.50
 -11  -3 -16  -17.10   20.20
 -11  -3 -16    7.30    7.00
 -11  -3 -16    6.80    5.40
  11   3  16  -11.40   21.40
  11   3  16   -2.50    5.80
  11   3  16  -45.30   45.20
 -10  -4 -16    8.80   21.40
 -10  -4 -16   19.00    6.80
 -10  -4 -16    3.80    6.20
  10   4  16    8.50    6.50
  10   4  16   -4.90   19.80
  10   4  16   14.30    6.40
  10   4  16  -20.10   56.39
  -9  -5 -16  106.89   19.00
  -9  -5 -16  114.09   18.50
  -9  -5 -16  150.28   31.80
   9   5  16  123.49   18.70
   9   5  16  102.59   28.00
  -8  -6 -16  290.67   49.10
  -8  -6 -16  207.78   36.30
   8   6  16  255.87   36.30
   8   6  16  295.97   45.10
  -7  -7 -16  222.38   40.30
   7   7  16  225.28   38.90
   7   7  16  154.98   26.80
   7   7  16  180.08   26.80
  -6  -8 -16  348.07   55.99
   6   8  16  279.47   38.00
   6   8  16  228.78   39.00
   6   8  16  245.38   47.00
  -5  -9 -16   62.89   34.80
  -5  -9 -16   73.99   13.00
   5   9  16   50.09   28.00
   5   9  16   60.29    9.20
   5   9  16   41.40   11.60
  -4 -10 -16   39.20   11.20
  -4 -10 -16   15.80   39.10
  -4 -10 -16   32.10    8.40
   4  10  16   29.50   30.30
   4  10  16   21.00    9.50
  -3 -11 -16  -30.40   43.00
  -3 -11 -16   11.70   11.90
  -3 -11 -16   25.50    8.50
   3  11  16    4.50    3.70
   3  11  16    4.10    6.70
   3  11  16   31.20   34.80
   3  11  16   15.10    9.00
  -2 -12 -16    2.10   15.80
  -2 -12 -16   38.50   53.89
  -2 -12 -16  -12.40   13.30
   2  12  16   19.10   38.20
   2  12  16    0.90    4.10
   2  12  16   13.50    8.40
  -1 -13 -16   -2.80   17.30
  -1 -13 -16  -45.10   14.70
   1  13  16    9.50    5.10
   1  13  16   -2.90   48.60
   1  13  16   -2.90    8.70
   0 -14 -16   -6.80   20.10
   0  14  16   14.00    5.60
   0  14  16  -25.70   59.89
   0  14  16  -19.10   10.70
   1 -15 -16    6.60   22.90
  -1  15  16   14.90   11.60
   2 -16 -16   11.40   26.30
   3 -17 -16   20.30   30.90
   4 -18 -16    6.60   35.20
  21  -8  15   57.19   22.40
 -20   7 -15   12.50   11.20
  20  -7  15   21.00   17.70
 -19   6 -15   62.09   13.20
  19  -6  15   62.59   18.80
 -18   5 -15   31.10    9.80
 -18   5 -15   63.59   16.00
 -18   5 -15   39.80   46.90
 -17   4 -15   47.50    9.40
 -17   4 -15   32.20   13.80
 -17   4 -15   76.59   41.30
  17  -4  15   49.30   61.39
  17  -4  15   60.39   12.90
  17  -4  15   40.30    8.00
 -16   3 -15   27.60   12.20
 -16   3 -15   64.89   37.90
 -16   3 -15   55.89   11.40
  16  -3  15   44.30    7.90
  16  -3  15   -7.60   52.29
  16  -3  15   40.30   11.20
 -15   2 -15   16.80    9.10
 -15   2 -15   15.30   26.10
 -15   2 -15   28.70    9.70
  15  -2  15   -1.20    7.40
  15  -2  15   11.10    4.30
  15  -2  15   19.00   42.90
 -14   1 -15   15.70    9.40
 -14   1 -15   10.20    6.50
 -14   1 -15   20.10   25.40
  14  -1  15   10.00    6.70
  14  -1  15   22.50    4.70
  14  -1  15   65.59   32.80
 -13   0 -15   -2.60    7.00
 -13   0 -15   25.80   23.40
 -13   0 -15   -6.00    4.90
  13   0  15  -20.90   24.80
  13   0  15   23.10   52.19
  13   0  15   -0.40    3.50
  13   0  15  -12.40    5.60
 -12  -1 -15   35.80    7.90
 -12  -1 -15   31.30    9.00
 -12  -1 -15   46.80   22.00
  12   1  15   43.30    7.30
  12   1  15   10.40   22.30
  12   1  15   49.30    8.50
 -11  -2 -15  232.48   33.80
 -11  -2 -15  251.87   42.80
 -11  -2 -15  208.68   33.20
  11   2  15  229.78   33.50
 -10  -3 -15  324.27   48.90
  10   3  15  338.07   48.90
  10   3  15  353.86   54.89
  -9  -4 -15  302.37   44.50
   9   4  15  302.67   44.40
  -8  -5 -15  167.58   28.40
  -8  -5 -15  274.37   40.80
   8   5  15  210.28   36.10
   8   5  15  193.68   28.50
  -7  -6 -15   51.79   11.10
  -7  -6 -15   67.29   11.70
  -7  -6 -15   56.39   25.40
   7   6  15   84.39   21.70
   7   6  15   69.09   11.50
  -6  -7 -15   37.70    9.10
  -6  -7 -15   25.90    9.90
  -6  -7 -15   60.09   25.40
   6   7  15   51.99    9.30
   6   7  15   42.80    8.50
   6   7  15   55.19   21.80
   6   7  15   52.59    7.20
  -5  -8 -15   20.10    7.50
  -5  -8 -15   26.80    8.00
  -5  -8 -15   44.60   26.80
   5   8  15   37.90    7.60
   5   8  15   24.60   20.90
   5   8  15   24.20    4.50
   5   8  15   23.30    6.40
  -4  -9 -15   -0.90    8.70
  -4  -9 -15    0.70   31.70
  -4  -9 -15    8.40    6.60
   4   9  15   28.60   24.80
   4   9  15   12.80    3.20
   4   9  15   13.00    7.80
   4   9  15   23.20    7.20
  -3 -10 -15   -5.20   10.20
  -3 -10 -15   14.00    7.20
  -3 -10 -15  -11.10   34.50
   3  10  15    5.70    8.10
   3  10  15    7.90    6.40
   3  10  15    6.70    3.10
   3  10  15   29.70   28.20
  -2 -11 -15   13.40    7.40
  -2 -11 -15  -19.20   42.20
  -2 -11 -15   -3.10   12.60
  -2 -11 -15   30.00   14.30
   2  11  15   -1.40    3.60
   2  11  15    7.90    6.20
   2  11  15  -27.10   32.00
   2  11  15    6.90    8.90
  -1 -12 -15   24.90   12.80
  -1 -12 -15   26.80    9.50
  -1 -12 -15    6.00   15.80
  -1 -12 -15   17.90   51.59
   1  12  15   59.79   38.60
   1  12  15   35.90    6.00
   1  12  15   27.00    8.50
   0 -13 -15   41.00   16.40
   0 -13 -15   73.19   20.00
   0  13  15   44.70   11.20
   0  13  15   50.69    8.50
   0  13  15  -11.20   47.20
   1 -14 -15   -8.20   27.50
   1 -14 -15   18.10   18.80
  -1  14  15  -73.49   58.09
   2 -15 -15   23.80   23.50
   3 -16 -15  -33.40   23.90
   4 -17 -15  -16.60   29.00
   5 -18 -15  -29.30   36.80
  21  -9  14   72.49   24.80
  20  -8  14   88.39   34.40
 -19   7 -14   34.50   11.30
  19  -7  14   52.99   19.20
 -18   6 -14   13.10    8.00
  18  -6  14    1.20   14.00
 -17   5 -14  -18.70   42.70
 -17   5 -14    0.20    6.60
 -17   5 -14   -9.50   11.30
  17  -5  14  -11.30   63.39
  17  -5  14   -9.40    4.10
  17  -5  14   -3.90   10.30
 -16   4 -14    7.40   34.10
 -16   4 -14   -7.50    9.50
 -16   4 -14    3.50    5.50
  16  -4  14  -55.59   54.49
  16  -4  14    5.70    8.60
  16  -4  14   -0.80    3.70
 -15   3 -14   19.30    9.40
 -15   3 -14   31.90   31.00
  15  -3  14    1.20    8.70
  15  -3  14  -16.30   42.20
  15  -3  14   19.30    4.70
 -14   2 -14   62.19   14.60
 -14   2 -14  119.79   29.20
 -14   2 -14   86.39   15.00
  14  -2  14   -3.90   37.60
  14  -2  14   76.39   13.90
  14  -2  14   89.09   12.60
 -13   1 -14  152.38   21.30
 -13   1 -14  174.98   31.60
 -13   1 -14  112.29   22.60
  13  -1  14  137.69   21.40
  13  -1  14  135.69   20.60
 -12   0 -14  496.35   71.39
 -12   0 -14  450.75   65.29
  12   0  14  437.56   64.49
  12   0  14  432.46   64.89
 -11  -1 -14  487.65   71.79
 -11  -1 -14  470.45   71.59
 -11  -1 -14  555.24   76.79
 -10  -2 -14  248.58   38.20
 -10  -2 -14  209.88   31.00
 -10  -2 -14  194.28   30.10
  10   2  14  189.48   39.20
  10   2  14  203.68   37.90
  -9  -3 -14   15.20    5.80
  -9  -3 -14   32.10    5.80
  -9  -3 -14   35.50   17.60
   9   3  14   16.80    5.80
   9   3  14   27.00    6.10
   9   3  14    6.70   16.90
  -8  -4 -14   -0.90    4.70
  -8  -4 -14    3.70   17.90
  -8  -4 -14    6.10    4.70
   8   4  14    0.60    4.70
   8   4  14   18.20   14.90
   8   4  14    6.50    4.70
  -7  -5 -14   64.29   10.60
  -7  -5 -14   52.19    9.60
   7   5  14   51.59    9.70
   7   5  14   34.10   18.00
  -6  -6 -14   15.70   19.30
  -6  -6 -14    3.10    6.00
   6   6  14    8.70    4.80
   6   6  14   -2.00   16.40
   6   6  14   15.50    4.80
  -5  -7 -14   -4.60   20.90
  -5  -7 -14   -7.00    5.30
  -5  -7 -14   -1.70    4.60
   5   7  14   11.90   17.70
   5   7  14   -9.30    4.00
   5   7  14   -3.20    1.90
   5   7  14    6.20    5.20
  -4  -8 -14   -1.90    6.70
  -4  -8 -14  -12.50   24.00
  -4  -8 -14    7.10    5.10
   4   8  14    3.00    2.20
   4   8  14   13.10    4.40
   4   8  14    3.00    5.50
   4   8  14    8.20   20.00
  -3  -9 -14   36.20    8.40
  -3  -9 -14   95.19   31.30
  -3  -9 -14   25.10    9.30
   3   9  14   51.99    7.80
   3   9  14   36.30    6.40
   3   9  14   37.40    9.30
   3   9  14   24.40   23.60
  -2 -10 -14   12.20    5.90
  -2 -10 -14   45.30   35.00
  -2 -10 -14   12.70    9.00
   2  10  14   12.80    3.50
   2  10  14   19.00    8.30
   2  10  14   41.20   26.50
  -1 -11 -14   12.70   40.90
  -1 -11 -14   12.80   12.90
  -1 -11 -14   16.80   11.20
  -1 -11 -14   19.00    6.10
   1  11  14    3.50    3.40
   1  11  14  -36.30   29.80
   1  11  14   16.70    8.50
   1  11  14    6.40    5.90
   0 -12 -14   14.40    7.50
   0 -12 -14    3.60   12.70
   0 -12 -14    6.00   15.40
   0  12  14   13.70    7.00
   0  12  14   18.90   12.80
   0  12  14  -15.30   37.00
   0  12  14    6.40    4.20
   1 -13 -14   14.60   14.40
   1 -13 -14   32.80   17.10
  -1  13  14   19.90    5.40
  -1  13  14   27.50   45.60
   2 -14 -14   42.40   20.80
   2 -14 -14   86.39   21.40
  -2  14  14  100.59   57.29
  -2  14  14   56.29   13.10
  -3  15  14   36.00   11.90
   4 -16 -14   34.60   26.00
   5 -17 -14  -21.60   27.70
  21 -10  13   73.79   29.50
  20  -9  13   42.10   24.80
 -19   8 -13   10.50    9.70
  19  -8  13   10.90   18.50
 -18   7 -13    1.60    8.10
  18  -7  13  -22.30   14.30
 -17   6 -13   43.30   45.60
 -17   6 -13    1.00   12.70
 -17   6 -13    8.00    6.80
  17  -6  13    7.20   11.70
  17  -6  13    6.50    4.90
  17  -6  13    3.40   64.69
 -16   5 -13    7.60    5.90
 -16   5 -13    1.40    9.70
 -16   5 -13   11.50   35.80
  16  -5  13   -1.40   54.79
  16  -5  13   22.60    5.10
  16  -5  13   -2.50    9.40
 -15   4 -13  243.38   42.80
  15  -4  13  293.87   40.90
  15  -4  13  289.57   42.00
 -14   3 -13  202.08   28.40
 -14   3 -13  172.18   26.90
 -13   2 -13  114.19   22.10
  13  -2  13  150.08   20.70
  13  -2  13  143.59   21.60
 -12   1 -13   64.79   11.70
 -12   1 -13   73.99   22.80
  12  -1  13   63.99   10.20
  12  -1  13  125.79   31.10
  12  -1  13   61.09   11.30
 -11   0 -13   21.50   16.50
 -11   0 -13    9.50    4.20
 -11   0 -13   -5.50    5.50
  11   0  13   13.60   20.80
 -10  -1 -13   26.40   16.30
 -10  -1 -13   15.00    5.70
 -10  -1 -13    3.80    4.20
  10   1  13    8.80    3.10
  10   1  13   15.40   25.20
  10   1  13   14.70    4.80
  10   1  13   16.60   18.80
  -9  -2 -13   62.39   10.60
  -9  -2 -13   79.69   19.80
  -9  -2 -13   55.39    9.60
   9   2  13   52.79    9.00
   9   2  13   95.19   19.20
  -8  -3 -13   28.00    6.60
  -8  -3 -13   40.70   16.90
  -8  -3 -13   34.60    6.60
   8   3  13   39.20    6.80
   8   3  13   42.80   15.00
   8   3  13   27.10    6.60
  -7  -4 -13   10.30    4.20
  -7  -4 -13   -7.10   14.50
  -7  -4 -13    0.90    4.10
   7   4  13    3.10    4.30
   7   4  13   -2.20   37.20
   7   4  13   -8.50    3.70
   7   4  13   -7.30   12.50
  -6  -5 -13   -4.50   16.70
  -6  -5 -13   15.70    4.90
  -6  -5 -13    4.70    4.00
   6   5  13   15.90    4.40
   6   5  13   13.20   13.70
  -5  -6 -13   21.40    5.70
  -5  -6 -13   17.20    6.00
  -5  -6 -13   15.10   18.40
   5   6  13   28.40    5.90
   5   6  13   31.70   14.80
  -4  -7 -13   17.90   20.20
  -4  -7 -13   16.80    6.30
  -4  -7 -13   20.80    5.80
   4   7  13   15.80    3.00
   4   7  13   13.70    4.50
   4   7  13   14.80    5.60
   4   7  13   14.80   15.90
  -3  -8 -13   12.70    6.50
  -3  -8 -13   -1.10    4.50
   3   8  13    5.10    2.10
   3   8  13   -9.10   17.90
   3   8  13    9.90    4.20
   3   8  13    5.00    5.50
  -2  -9 -13   84.49   15.10
  -2  -9 -13  153.18   33.20
   2   9  13   73.29   13.40
   2   9  13   90.59   26.10
   2   9  13   84.19   12.40
  -1 -10 -13  170.58   27.20
  -1 -10 -13  155.68   43.40
   1  10  13  172.08   37.30
   1  10  13  137.49   27.00
   1  10  13  167.58   24.30
   1  10  13  177.98   25.80
   0 -11 -13  135.19   47.90
   0 -11 -13  146.89   27.40
   0  11  13  130.79   40.40
   0  11  13  180.18   24.50
   1 -12 -13  115.59   23.40
   1 -12 -13   80.39   20.60
   1 -12 -13  113.29   18.50
  -1  12  13  137.29   21.10
  -1  12  13  131.79   41.00
  -1  12  13  114.39   17.10
   2 -13 -13   16.20   16.30
   2 -13 -13   26.80   14.80
  -2  13  13  -23.10   45.50
  -2  13  13   13.80    7.80
   3 -14 -13   -5.90   17.40
   3 -14 -13   21.30   18.30
  -3  14  13   -1.90    9.00
  -3  14  13   -7.60   56.09
   4 -15 -13  -12.60   22.20
  -4  15  13   -2.40   11.40
   5 -16 -13  -16.50   23.60
   6 -17 -13  -12.10   26.80
 -20  10 -12  -11.10   11.30
  20 -10  12   20.80   23.00
 -19   9 -12   -5.50   10.70
  19  -9  12  -12.50   20.10
 -18   8 -12   19.50    8.90
  18  -8  12    6.70   16.50
 -17   7 -12   86.09   48.20
 -17   7 -12   69.69   13.00
 -17   7 -12   75.09   18.60
  17  -7  12   75.59   12.20
  17  -7  12   67.49   17.70
 -16   6 -12   35.70   15.20
 -16   6 -12   42.80    9.50
 -16   6 -12   88.19   40.90
  16  -6  12   22.50   55.39
  16  -6  12   70.29   13.50
  16  -6  12   52.69    9.10
 -15   5 -12   45.60   36.10
  15  -5  12   52.39   12.40
  15  -5  12   22.80   44.10
  15  -5  12   57.59    9.30
 -14   4 -12   10.40    3.90
 -14   4 -12   10.50   29.20
 -14   4 -12    0.50    8.10
 -14   4 -12   -4.80    7.90
  14  -4  12    6.90    6.30
  14  -4  12    6.20   38.10
  14  -4  12    2.60    2.80
 -13   3 -12   94.69   17.00
 -13   3 -12  149.79   31.30
  13  -3  12   98.09   14.90
 -12   2 -12  221.08   32.20
  12  -2  12  209.78   31.80
 -11   1 -12  282.67   40.80
 -11   1 -12  331.07   47.20
  11  -1  12  282.07   40.80
  11  -1  12  256.17   40.40
  11  -1  12  301.27   51.49
 -10   0 -12   56.09    8.80
 -10   0 -12   79.09   18.30
 -10   0 -12   44.40    7.70
  10   0  12   37.60    7.10
  10   0  12   76.39   21.90
  10   0  12    8.70   33.10
  -9  -1 -12   32.30    5.40
  -9  -1 -12    9.90   13.30
  -9  -1 -12   22.60    5.90
   9   1  12    7.30   24.50
   9   1  12   37.00   16.30
   9   1  12   24.20    5.60
  -8  -2 -12   12.60   12.90
  -8  -2 -12    1.80    3.70
   8   2  12   53.09   24.80
   8   2  12    0.30   13.00
  -7  -3 -12   95.99   19.20
  -7  -3 -12   69.79   11.80
  -7  -3 -12   63.69   12.10
   7   3  12   97.29   17.40
   7   3  12   80.59   11.90
  -6  -4 -12   -2.40    3.30
  -6  -4 -12    2.60   13.30
  -6  -4 -12    0.40    3.90
   6   4  12    8.70    3.60
   6   4  12    5.80   11.80
   6   4  12    4.60    3.40
  -5  -5 -12   67.89    9.70
  -5  -5 -12   68.99   18.40
  -5  -5 -12   49.50    8.80
   5   5  12   44.40   14.90
   5   5  12   45.70    9.00
  -4  -6 -12  480.35   66.99
   4   6  12  433.36   69.89
  -3  -7 -12  620.64   93.49
   3   7  12  545.85   91.99
   3   7  12  677.93   88.99
   3   7  12  597.14   88.49
  -2  -8 -12  695.43   94.69
   2   8  12  531.85   88.29
   2   8  12  644.74   87.79
  -1  -9 -12  331.37   57.59
   1   9  12  288.87   52.69
   1   9  12  333.87   45.10
   1   9  12  286.87   44.20
   0 -10 -12   68.09   14.00
   0 -10 -12  139.59   34.30
   0 -10 -12   50.89   14.90
   0 -10 -12   51.99   11.70
   0  10  12   83.59   12.00
   0  10  12   61.39   12.70
   0  10  12   73.49   10.60
   0  10  12  120.19   27.30
   1 -11 -12   34.00   13.50
   1 -11 -12   -2.20   10.60
   1 -11 -12   16.60    5.90
  -1  11  12   16.50    5.40
  -1  11  12    7.70    8.70
  -1  11  12   10.60    3.50
  -1  11  12    8.90   29.00
   2 -12 -12   -8.50   12.80
   2 -12 -12    5.60    6.00
   2 -12 -12  -11.00   13.40
  -2  12  12   49.00   36.00
  -2  12  12   -1.00    3.60
  -2  12  12   14.70   10.00
  -2  12  12    8.10    5.80
   3 -13 -12    4.40   13.90
   3 -13 -12    1.20   14.80
  -3  13  12   -2.70    6.90
  -3  13  12   52.89   43.80
   4 -14 -12  -23.20   16.60
   4 -14 -12   -8.50   17.30
  -4  14  12    2.80   55.39
  -4  14  12  -18.40    8.10
   5 -15 -12    5.60   19.80
  -5  15  12   -5.40   10.10
   6 -16 -12   39.10   26.20
   7 -17 -12    5.30   26.20
  20 -11  11   43.90   29.90
 -19  10 -11   34.60   12.40
 -18   9 -11   26.80    9.40
  18  -9  11   52.39   19.40
 -17   8 -11   14.80    7.20
  17  -8  11   -0.60    5.60
  17  -8  11    7.20   16.30
 -16   7 -11   46.70   14.60
 -16   7 -11   20.10    7.80
 -16   7 -11   83.29   42.30
  16  -7  11   62.09   13.40
  16  -7  11   37.80    7.00
  16  -7  11   10.20   50.99
 -15   6 -11  213.68   27.90
 -15   6 -11  123.89   43.10
 -15   6 -11  159.58   25.40
  15  -6  11  171.18   27.40
  15  -6  11  165.78   24.90
 -14   5 -11  499.55   70.79
 -14   5 -11  493.95   65.89
 -14   5 -11  402.96   77.19
  14  -5  11  375.46   65.79
 -13   4 -11  256.07   38.40
  13  -4  11  258.87   38.30
  12  -3  11  145.59   22.20
 -11   2 -11   56.39   18.80
 -11   2 -11   20.90    4.00
 -11   2 -11  -17.70   25.30
  11  -2  11  -18.60   21.30
 -10   1 -11    3.60    4.70
 -10   1 -11   -0.10   14.90
 -10   1 -11    8.20    3.90
  10  -1  11    3.60    3.50
  10  -1  11   -8.20   25.10
  10  -1  11   10.30    2.50
  10  -1  11   -5.10   18.20
  -9   0 -11    0.30    4.10
  -9   0 -11    3.50    3.00
  -9   0 -11    6.10   12.60
   9   0  11  -18.60   26.10
   9   0  11    6.50    3.40
   9   0  11   -2.40   14.70
   9   0  11   -2.30    2.00
  -8  -1 -11  111.39   15.90
  -8  -1 -11   94.69   15.30
   8   1  11  101.89   23.40
  -7  -2 -11  212.38   30.80
  -7  -2 -11  198.38   30.80
  -7  -2 -11  235.18   34.70
  -6  -3 -11  700.03  110.39
  -6  -3 -11  784.32  110.39
   6   3  11  823.72  112.19
  -5  -4 -11 1142.99  160.28
   5   4  11 1062.09  158.28
  -4  -5 -11  907.21  135.39
   4   5  11  944.21  133.09
   4   5  11  915.91  132.99
  -3  -6 -11  352.06   57.59
   3   6  11  418.66   56.79
   3   6  11  347.47   53.19
  -2  -7 -11   72.59   10.30
  -2  -7 -11   52.29   10.70
  -2  -7 -11   59.39   20.80
   2   7  11   62.69    9.30
  -1  -8 -11   42.60    7.30
  -1  -8 -11   36.60   20.90
  -1  -8 -11   13.90    5.40
   1   8  11   35.30    6.50
   1   8  11   23.90    4.10
   1   8  11   21.90   17.60
   1   8  11   25.40    5.20
   0  -9 -11  120.49   16.60
   0  -9 -11   90.59   14.90
   0  -9 -11  113.89   30.50
   0   9  11   40.80   63.59
   0   9  11   86.99   15.70
   1 -10 -11   33.40   10.80
   1 -10 -11   48.00   11.80
  -1  10  11   47.90    7.90
  -1  10  11   21.50   25.10
  -1  10  11   38.50    7.00
  -1  10  11   50.29    9.60
   2 -11 -11   18.70   12.50
   2 -11 -11   -6.60    5.00
   2 -11 -11  -11.50    9.70
  -2  11  11   -2.40    2.70
  -2  11  11   -0.40    7.70
  -2  11  11    9.00    4.70
  -2  11  11  -39.90   26.50
   3 -12 -11   12.40    6.80
   3 -12 -11   45.40   14.40
  -3  12  11  -45.10   33.90
  -3  12  11   25.20    6.50
  -3  12  11   41.30   11.40
   4 -13 -11   17.50    7.90
   4 -13 -11   12.90   13.90
   4 -13 -11   33.20   15.40
  -4  13  11   34.80    8.30
  -4  13  11   -0.30   43.10
   5 -14 -11   22.80   17.80
   5 -14 -11   13.50   18.30
  -5  14  11   38.80   56.39
  -5  14  11   33.80   10.20
   6 -15 -11   13.60   19.70
  -6  15  11    4.30   10.60
  19 -11  10   32.60   24.80
  18 -10  10   53.49   22.10
 -17   9 -10   59.49   12.40
  17  -9  10   96.69   20.00
 -16   8 -10   97.99   17.40
 -16   8 -10  125.79   20.80
 -16   8 -10   73.09   52.49
  16  -8  10  111.29   21.30
 -15   7 -10   27.30   59.69
 -15   7 -10   62.29   42.40
 -15   7 -10   63.19   13.70
  15  -7  10  -18.20   52.09
  15  -7  10   44.30    8.10
 -14   6 -10  138.99   36.30
 -14   6 -10   68.89   14.60
 -14   6 -10   20.10   51.19
 -14   6 -10   68.29   12.10
  14  -6  10   21.50   45.40
  14  -6  10   78.89   11.70
  14  -6  10   89.89   14.50
 -13   5 -10   47.10   29.30
 -13   5 -10   18.10    8.10
 -13   5 -10  -15.70   41.60
 -13   5 -10   32.00    8.40
 -13   5 -10   21.10    5.10
  13  -5  10   20.30    7.80
  13  -5  10   -5.50   37.20
  13  -5  10   25.00    4.50
 -12   4 -10    9.30    6.40
 -12   4 -10    7.20    3.60
 -12   4 -10   -9.70   20.50
 -12   4 -10   18.70    6.30
  12  -4  10   -8.70   26.90
  12  -4  10   11.50    5.40
  12  -4  10   16.20    3.00
 -11   3 -10    4.50    2.70
 -11   3 -10  -24.50   17.40
 -11   3 -10    5.60    5.90
  11  -3  10    4.80    4.10
  11  -3  10   10.20    2.50
  11  -3  10   13.50   25.80
 -10   2 -10    6.30    4.60
 -10   2 -10   15.10   15.80
 -10   2 -10    2.00    2.10
  10  -2  10    7.60    2.20
  10  -2  10    4.60   20.20
  10  -2  10    4.70    3.40
  -9   1 -10  115.39   16.60
   9  -1  10  142.89   25.30
   9  -1  10   98.69   15.70
  -8   0 -10  533.25   73.99
  -8   0 -10  554.44   74.09
   8   0  10  475.65   73.99
   8   0  10  488.75   73.79
  -7  -1 -10  789.22  113.29
  -7  -1 -10  812.12  115.09
  -7  -1 -10  814.62  113.39
   7   1  10  719.83  115.09
  -6  -2 -10  948.81  145.39
   6   2  10 1071.19  145.49
  -5  -3 -10  243.58   36.50
  -5  -3 -10  224.28   33.50
   5   3  10  266.97   36.10
   5   3  10  212.68   33.50
  -4  -4 -10   22.00    4.80
  -4  -4 -10   18.60    4.90
   4   4  10   23.40    9.50
   4   4  10   28.50    4.90
  -3  -5 -10  136.49   23.90
  -3  -5 -10  128.29   18.70
   3   5  10  124.49   18.50
   3   5  10   97.89   22.70
  -2  -6 -10   98.19   15.90
  -2  -6 -10  138.89   23.60
   2   6  10  112.19   21.90
   2   6  10   94.39   15.00
   2   6  10  111.19   15.30
  -1  -7 -10   31.60    7.10
  -1  -7 -10   71.89   19.70
  -1  -7 -10   44.20    8.00
   1   7  10   48.00    6.40
   1   7  10   43.30   15.70
   1   7  10   39.80    7.70
   0  -8 -10    1.00    3.30
   0  -8 -10    0.20    5.70
   0  -8 -10   -5.10   19.10
   0   8  10    5.00    3.00
   0   8  10   -0.20    1.60
   0   8  10    1.30    4.30
   0   8  10    5.60   16.60
   1  -9 -10   10.90    8.10
   1  -9 -10   19.30    5.10
   1  -9 -10   -9.30   26.80
  -1   9  10   20.60    6.90
  -1   9  10   26.50   19.20
  -1   9  10   27.30    4.20
  -1   9  10   37.60    5.70
   2 -10 -10   17.00    4.60
   2 -10 -10    8.20    8.50
  -2  10  10   17.90    3.60
  -2  10  10   18.00    4.90
  -2  10  10   33.20    7.30
   3 -11 -10   63.59   14.00
   3 -11 -10   40.10   11.90
  -3  11  10   76.59   65.89
  -3  11  10   57.39   10.90
  -3  11  10   37.70    8.00
  -3  11  10    1.20   27.50
   4 -12 -10   11.20    5.20
   4 -12 -10   13.90   12.40
  -4  12  10    9.80   10.60
  -4  12  10   -4.00   34.50
  -4  12  10    2.60    5.40
   5 -13 -10   31.50   15.30
   5 -13 -10   16.40   15.10
   5 -13 -10   41.30    9.30
  -5  13  10   49.00    9.70
  -5  13  10   52.09   44.40
   6 -14 -10   71.79   20.50
   6 -14 -10   64.19   22.30
  -6  14  10   92.59   66.59
   7 -15 -10   36.90   21.60
  -7  15  10   45.30   11.30
   8 -16 -10   46.20   24.30
  19 -12   9   61.49   30.10
 -18  11  -9   52.19   12.60
  18 -11   9   70.39   26.80
  17 -10   9   82.79   24.30
 -16   9  -9    8.50    6.20
  16  -9   9   14.10   15.60
  16  -9   9   -3.80    5.50
 -15   8  -9  -25.00   68.59
 -15   8  -9   41.20   45.50
  15  -8   9   13.40   50.99
  15  -8   9   34.00   13.00
 -14   7  -9   -4.10    3.70
 -14   7  -9   25.50   37.00
 -14   7  -9  -65.89   56.29
 -14   7  -9   -7.10    9.10
  14  -7   9   -2.30    3.30
  14  -7   9   15.20   43.30
  14  -7   9   -3.20    9.20
 -13   6  -9  -76.39   47.80
 -13   6  -9   -3.00    3.40
 -13   6  -9    2.30    7.10
 -13   6  -9   50.29   29.40
 -13   6  -9   -9.20    7.70
  13  -6   9   -4.70   41.00
  13  -6   9    2.30    6.80
  13  -6   9    0.40    2.80
 -12   5  -9   16.30   28.10
 -12   5  -9   55.29   10.90
 -12   5  -9   46.00   10.50
  12  -5   9   60.49    8.70
  12  -5   9    5.70   37.10
 -11   4  -9  138.69   22.30
 -11   4  -9  164.48   21.60
 -11   4  -9  119.99   22.20
 -11   4  -9  211.98   33.30
  11  -4   9  127.79   22.30
  11  -4   9  152.88   21.30
 -10   3  -9  227.28   36.90
 -10   3  -9  214.38   29.60
  10  -3   9  178.58   29.30
  -9   2  -9   69.29   10.20
  -9   2  -9   62.59   11.50
  -9   2  -9  112.69   19.70
   9  -2   9   63.59   10.90
  -8   1  -9   99.49   16.60
  -8   1  -9   57.29   10.70
  -8   1  -9   62.49    9.90
   8  -1   9   58.79   10.40
   8  -1   9   95.49   19.50
   8  -1   9   75.79   10.00
  -7   0  -9    2.40    2.20
  -7   0  -9   -6.00    9.30
  -7   0  -9   -0.30    3.10
   7   0   9   -4.40    2.10
   7   0   9    3.40    1.60
   7   0   9    3.80   10.40
   7   0   9   -3.10   19.30
  -6  -1  -9   50.49    8.00
   6   1   9   55.19   13.10
   6   1   9   48.60   17.20
  -5  -2  -9  135.29   21.00
  -5  -2  -9  110.29   17.70
   5   2   9  132.39   20.40
   5   2   9  108.09   17.70
   5   2   9  129.09   17.70
  -4  -3  -9  415.66   61.89
  -3  -4  -9  133.39   18.90
  -3  -4  -9  139.69   22.40
   3   4   9  127.29   21.90
   3   4   9  117.29   18.80
  -2  -5  -9  125.29   17.60
  -2  -5  -9  123.59   22.40
   2   5   9  107.69   17.40
   2   5   9  109.29   17.20
   2   5   9  126.29   17.00
   2   5   9  111.79   21.50
  -1  -6  -9   11.00    2.90
  -1  -6  -9   12.70   12.50
  -1  -6  -9    8.30    3.90
   1   6   9    8.90    2.80
   1   6   9    5.10   11.10
   1   6   9   15.00    3.80
   1   6   9    7.60    1.80
   0  -7  -9   -1.30   15.20
   0  -7  -9   12.30    5.10
   0  -7  -9   12.70    3.20
   0   7   9    8.10    1.90
   0   7   9    2.30   12.60
   1  -8  -9   13.10   18.80
   1  -8  -9   17.40    6.50
   1  -8  -9    8.60    3.40
   1  -8  -9   13.00    6.10
  -1   8   9   14.90    2.70
  -1   8   9   -4.70   29.20
  -1   8   9   17.90    3.60
  -1   8   9    0.70   14.10
  -1   8   9   17.20    5.00
   2  -9  -9   56.59   10.60
   2  -9  -9   50.69    9.10
  -2   9   9   56.29    8.30
  -2   9   9   46.60   20.80
   3 -10  -9  228.68   30.30
   3 -10  -9  161.38   27.00
   3 -10  -9  150.28   28.70
  -3  10   9  204.28   38.60
  -3  10   9  206.68   27.20
  -3  10   9  220.38   28.50
  -3  10   9  177.88   27.30
   4 -11  -9  231.28   35.80
   4 -11  -9  226.18   33.20
  -4  11   9  268.57   51.19
  -4  11   9  240.78   33.70
  -4  11   9  206.08   35.00
   5 -12  -9  106.89   22.30
  -5  12   9  135.49   42.60
  -5  12   9  135.09   22.10
   6 -13  -9   59.79   16.80
   6 -13  -9   69.29   16.50
   6 -13  -9   28.40    9.40
  -6  13   9  106.49   48.90
  -6  13   9   48.20    9.70
   7 -14  -9   38.90   16.40
   7 -14  -9   22.20   17.30
  -7  14   9   43.50   71.19
  -7  14   9   16.40    8.10
   8 -15  -9  -15.00   19.20
  -8  15   9    2.00    8.60
   9 -16  -9   -7.40   21.50
  18 -12   8   48.10   29.40
 -17  11  -8   -4.00    8.00
  17 -11   8    9.80   21.00
 -16  10  -8   -1.80    6.10
  16 -10   8  -18.70   16.90
 -15   9  -8   -7.50   12.60
 -15   9  -8    1.90    5.50
  15  -9   8   -7.90    4.90
  15  -9   8  -11.30   13.60
 -14   8  -8   21.00    5.30
 -14   8  -8   17.80   10.60
 -14   8  -8   -6.80   54.49
 -14   8  -8   25.70   44.10
  14  -8   8   27.20   12.30
  14  -8   8   11.00   59.69
  14  -8   8   21.80    5.40
 -13   7  -8   92.69   41.20
 -13   7  -8  129.69   20.10
 -13   7  -8  134.19   22.00
 -13   7  -8   56.49   53.99
  13  -7   8  145.09   19.90
 -12   6  -8  172.48   36.30
 -12   6  -8  207.98   38.70
 -12   6  -8  115.49   19.40
 -12   6  -8  130.49   20.60
 -12   6  -8  137.29   21.00
 -11   5  -8  230.48   30.50
 -11   5  -8  201.68   30.70
  11  -5   8  179.88   30.60
 -10   4  -8   32.50   19.80
  10  -4   8  -20.00   23.80
  -9   3  -8  270.17   37.50
   9  -3   8  252.17   36.70
   9  -3   8  242.58   37.20
   8  -2   8  193.48   28.40
  -7   1  -8  786.12  127.49
   7  -1   8  981.10  127.39
  -6   0  -8  615.24   85.99
   6   0   8  578.54   85.89
  -5  -1  -8  688.93  104.29
  -5  -1  -8  707.03  103.19
   5   1   8  754.52  104.39
  -4  -2  -8  205.98   29.50
   4   2   8  185.18   29.20
   4   2   8  183.78   27.50
  -3  -3  -8   -5.50    6.40
   3   3   8    1.30    1.90
   3   3   8   -1.60    2.10
   3   3   8    8.20    7.10
  -2  -4  -8   14.70    3.30
  -2  -4  -8   21.80    3.80
   2   4   8   16.90    8.20
   2   4   8   13.80    3.40
  -1  -5  -8   58.09    8.10
  -1  -5  -8   44.50    8.70
   1   5   8   47.50    7.70
   1   5   8   71.99   13.30
   1   5   8   61.29    8.60
   0   6   8  370.36   52.39
   0   6   8  329.67   49.40
   1  -7  -8  412.96   62.89
   1  -7  -8  469.95   67.59
  -1   7   8  396.76   65.99
  -1   7   8  466.55   62.79
   2  -8  -8  597.74   99.99
   2  -8  -8  731.93   99.69
   2  -8  -8  690.43   99.49
  -2   8   8  739.43   99.69
   3  -9  -8  457.55   64.89
   3  -9  -8  472.35   65.29
   3  -9  -8  414.56   64.09
  -3   9   8  445.46   64.09
  -3   9   8  445.76   70.09
   4 -10  -8  311.17   42.20
   4 -10  -8  256.77   40.90
   4 -10  -8  256.47   39.40
   4 -10  -8  285.37   39.20
  -4  10   8  239.78   50.69
  -4  10   8  313.37   40.30
  -4  10   8  237.38   39.50
   5 -11  -8   10.70    4.20
   5 -11  -8    8.70    9.90
   5 -11  -8   17.60   10.10
  -5  11   8  -23.70   59.39
  -5  11   8   28.70    8.70
  -5  11   8   14.60   28.90
   6 -12  -8  -19.00   11.40
   6 -12  -8    4.70    4.80
  -6  12   8    6.90   10.10
  -6  12   8   -4.10    5.00
  -6  12   8   24.00   37.80
   7 -13  -8    9.10    5.90
   7 -13  -8    0.10   15.20
   7 -13  -8    7.30   12.70
  -7  13   8   12.20   48.90
   8 -14  -8   35.70   16.50
   8 -14  -8    3.90   19.70
  -8  14   8  -10.00    6.80
  -8  14   8  -75.89   71.49
   9 -15  -8    2.80   18.30
   9 -15  -8    4.70   34.10
  -9  15   8  -14.50    9.20
  18 -13   7   42.40   33.00
 -17  12  -7   -4.30    8.80
  17 -12   7  -24.20   24.50
 -16  11  -7   22.00    7.90
  16 -11   7   15.30   18.90
 -15  10  -7   12.80    6.10
  15 -10   7   38.50   17.80
  15 -10   7   15.20    7.00
 -14   9  -7   37.40    7.20
 -14   9  -7   58.49   63.89
 -14   9  -7   30.60   12.30
 -14   9  -7   -3.50   51.39
  14  -9   7   31.20   14.90
  14  -9   7  -36.00   64.89
 -13   8  -7   18.50    4.70
 -13   8  -7   19.50    9.70
 -13   8  -7   19.70   44.70
  13  -8   7   21.70   46.70
  13  -8   7   14.60    4.70
 -11   6  -7   93.49   14.90
 -11   6  -7   99.59   34.20
 -11   6  -7  105.99   15.30
  11  -6   7   84.59   13.30
  11  -6   7   18.00   34.50
 -10   5  -7  276.47   40.90
  10  -5   7  289.97   41.50
  -9   4  -7  620.94   94.29
  -9   4  -7  643.54   94.29
  -9   4  -7  691.23   94.09
   8  -3   7  483.75   63.39
   8  -3   7  397.96   63.09
  -7   2  -7  185.68   29.60
   7  -2   7  219.38   29.60
  -6   1  -7    5.10   13.30
  -6   1  -7   19.80    7.80
  -6   1  -7    3.60    1.40
  -6   1  -7    7.40    2.70
   6  -1   7    7.10   10.40
   6  -1   7    6.70    1.50
   6  -1   7    8.90    9.70
  -5   0  -7  -10.60   12.20
  -5   0  -7    3.90    5.80
  -5   0  -7   -2.60    1.80
  -5   0  -7    2.00    1.60
   5   0   7   -1.70    7.40
   5   0   7    6.20    8.40
   5   0   7    0.60    1.10
   5   0   7    0.30    1.70
  -4  -1  -7   25.30    4.20
  -3  -2  -7  133.59   18.70
  -3  -2  -7  108.49   16.90
   3   2   7  117.79   16.90
   3   2   7  110.59   18.40
  -2  -3  -7  675.63   98.79
  -2  -3  -7  611.44   99.69
   2   3   7  697.93   99.69
   2   3   7  751.42   98.79
  -1  -4  -7  641.34   92.99
   1   4   7  627.14   92.79
   1   4   7  668.03   94.09
   1   4   7  647.24   92.89
   0  -5  -7 1464.95  210.18
   0   5   7 1436.16  209.88
   1  -6  -7 1089.59  148.19
  -1   6   7  956.70  149.59
   2  -7  -7  185.88   28.10
   2  -7  -7  161.98   27.60
   2  -7  -7  178.48   26.90
  -2   7   7  203.48   32.50
  -2   7   7  208.28   27.00
   3  -8  -7    7.40    1.80
   3  -8  -7    6.40    2.50
   3  -8  -7   15.20    7.70
   3  -8  -7   21.40    5.50
  -3   8   7    5.70    1.90
  -3   8   7  -49.60   32.40
  -3   8   7    6.30    2.70
  -3   8   7   22.10   15.60
   4  -9  -7   80.79   13.20
   4  -9  -7   69.99   10.60
  -4   9   7   66.09   11.10
  -4   9   7   87.69   12.60
  -4   9   7   -3.40   45.50
   5 -10  -7   84.29   15.50
   5 -10  -7   90.99   13.00
   5 -10  -7  105.19   16.90
   5 -10  -7   81.69   13.30
  -5  10   7   83.39   15.30
  -5  10   7  124.09   30.50
  -5  10   7   22.40   47.20
   6 -11  -7   38.00   11.30
   6 -11  -7   40.10    6.30
   6 -11  -7   27.90    5.40
   6 -11  -7   44.60   12.30
  -6  11   7   29.20   31.00
  -6  11   7   15.30   10.00
  -6  11   7   32.40    6.80
  -6  11   7   29.80   57.79
   7 -12  -7   -1.20    4.70
   7 -12  -7   11.50   12.30
   7 -12  -7   11.10   12.10
   7 -12  -7    2.80    3.20
  -7  12   7  -27.60   40.40
  -7  12   7   -3.70   10.30
  -7  12   7   10.70    5.20
   8 -13  -7  -16.60   16.30
   8 -13  -7   54.29   13.40
   8 -13  -7   13.80    6.70
  -8  13   7   30.60   51.69
  -8  13   7   21.30    6.60
   9 -14  -7   -0.20   13.50
   9 -14  -7   13.60   20.00
  -9  14   7  -67.19   76.89
  -9  14   7   13.80    7.60
  10 -15  -7    3.20   17.20
  10 -15  -7   42.90   26.40
 -10  15   7    6.00    8.60
  17 -13   6   32.00   30.00
  16 -12   6   -1.40   23.80
  15 -11   6   22.00   18.10
 -14  10  -6   19.10   76.39
 -14  10  -6   48.70   15.80
  14 -10   6   78.29   17.50
 -13   9  -6  121.59   19.10
 -13   9  -6  140.89   22.40
  13  -9   6  129.59   23.30
 -12   8  -6  101.59   15.90
 -12   8  -6   20.90   42.70
 -12   8  -6  120.39   18.80
  12  -8   6  118.79   19.10
 -11   7  -6  126.89   22.80
 -11   7  -6  138.99   21.50
 -11   7  -6  169.18   23.00
  11  -7   6  164.18   23.30
 -10   6  -6  176.18   25.40
  10  -6   6  142.09   25.30
  10  -6   6  174.78   24.30
  -9   5  -6  103.29   16.00
  -9   5  -6  104.29   15.10
   9  -5   6  101.89   15.00
   9  -5   6   47.10   28.90
   9  -5   6  105.39   16.10
  -8   4  -6   96.09   16.70
   8  -4   6  102.09   16.90
   8  -4   6  125.29   16.20
  -7   3  -6   17.30   15.30
  -7   3  -6    7.30    3.10
  -7   3  -6    4.40    2.90
  -7   3  -6   20.60   17.50
   7  -3   6   -2.00   16.20
   7  -3   6    5.90    3.30
  -6   2  -6  122.69   15.80
   6  -2   6   95.79   15.40
  -5   1  -6  180.38   26.10
  -4   0  -6  436.36   62.79
  -4   0  -6  461.45   62.79
   4   0   6  426.96   62.79
   4   0   6  410.96   63.89
  -3  -1  -6  116.99   16.30
  -3  -1  -6  106.09   16.30
   3   1   6  112.09   16.30
  -2  -2  -6  522.05   69.89
   2   2   6  452.05   68.99
   2   2   6  521.35   68.99
   2   2   6  421.46   69.59
  -1  -3  -6  152.78   22.50
  -1  -3  -6  143.49   23.90
   1   3   6  157.38   23.90
   1   3   6  162.08   22.50
   0  -4  -6   34.80    9.20
   0  -4  -6   26.40    4.50
   0  -4  -6   26.90    4.90
   0   4   6   24.20    4.80
   0   4   6   30.30    4.20
   0   4   6   41.30    8.30
   1  -5  -6  180.48   29.20
   1  -5  -6  213.38   32.30
   1  -5  -6  204.28   29.10
  -1   5   6  226.48   29.40
  -1   5   6  189.08   31.80
   2  -6  -6  314.27   43.60
  -2   6   6  274.67   43.30
  -2   6   6  314.57   43.20
  -2   6   6  318.37   43.60
  -2   6   6  262.27   46.10
   3  -7  -6  220.98   30.00
   3  -7  -6  204.08   30.10
   3  -7  -6  212.68   30.80
  -3   7   6  206.18   30.10
  -3   7   6  167.48   35.50
   4  -8  -6  143.99   23.80
   4  -8  -6  154.88   22.50
  -4   8   6  205.28   31.90
   5  -9  -6    0.30    6.80
   5  -9  -6    1.70    1.60
   5  -9  -6   10.90    7.20
   5  -9  -6   -1.40    3.00
  -5   9   6   12.30   39.80
  -5   9   6  -12.30   20.70
  -5   9   6    7.60    5.30
  -5   9   6   -3.00    2.70
   6 -10  -6    5.80    2.20
   6 -10  -6    6.40    3.30
   6 -10  -6   -3.20    7.70
   6 -10  -6   -0.80    9.10
  -6  10   6  -28.90   49.90
  -6  10   6    0.40    6.20
  -6  10   6   18.60   25.90
   7 -11  -6   -4.00   10.60
   7 -11  -6   -2.70    2.40
   7 -11  -6   15.80    8.90
   7 -11  -6    3.10    4.40
  -7  11   6   11.00    4.20
  -7  11   6  -23.50   51.49
  -7  11   6    0.30    8.10
  -7  11   6    6.40   33.10
   8 -12  -6   11.20   10.00
   8 -12  -6   -7.80   11.90
   8 -12  -6    1.40    5.00
   8 -12  -6   -6.00    3.30
  -8  12   6    1.70   10.40
  -8  12   6   -9.50   42.10
   9 -13  -6   30.30   16.60
   9 -13  -6   29.70   13.60
  -9  13   6   64.99   57.19
  -9  13   6   46.40    8.70
  10 -14  -6   22.80   21.40
  10 -14  -6   39.40   15.90
 -10  14   6   47.80   71.09
  11 -15  -6   50.99   39.50
 -11  15   6   45.60   11.40
  17 -14   5   21.90   31.00
 -16  13  -5   40.90   10.80
  16 -13   5   66.49   45.60
 -15  12  -5   40.60   10.00
  15 -12   5  105.39   23.00
 -14  11  -5  103.79   17.50
  14 -11   5  133.99   25.30
 -13  10  -5  108.39   17.90
 -13  10  -5  127.69   21.90
 -13  10  -5   29.30   67.79
  13 -10   5  152.18   24.30
 -12   9  -5   55.19   48.30
 -12   9  -5   95.49   19.10
 -12   9  -5  119.79   16.60
  12  -9   5  102.09   21.30
  12  -9   5   33.60   57.69
 -11   8  -5   33.70   41.50
 -11   8  -5   -1.60    7.50
 -11   8  -5    3.80    2.90
  11  -8   5   -5.80    8.10
  11  -8   5    2.00   39.10
 -10   7  -5   11.20    6.30
 -10   7  -5  -32.60   30.50
 -10   7  -5    0.40    2.20
 -10   7  -5   -1.10    6.30
  10  -7   5   -0.70    6.30
  10  -7   5   -4.00    3.00
  10  -7   5    9.70   40.00
  -9   6  -5   -2.10    4.60
  -9   6  -5    0.20   27.60
  -9   6  -5    4.80    2.10
   9  -6   5    6.50    2.30
   9  -6   5   21.50   30.20
   9  -6   5   -4.30    4.90
  -8   5  -5   16.60   22.00
   8  -5   5   40.20    6.10
   8  -5   5   -2.50   23.60
  -7   4  -5  313.97   45.60
  -6   3  -5  190.08   26.60
  -6   3  -5  191.78   26.40
  -6   3  -5  165.18   26.20
  -5   2  -5  238.38   31.00
  -5   2  -5  197.08   30.70
   5  -2   5  206.08   30.90
  -4   1  -5   -0.90    8.40
  -4   1  -5   12.10    6.30
  -4   1  -5    9.70    2.00
  -4   1  -5    6.10    1.20
   4  -1   5   21.10    8.60
   4  -1   5   -2.40    6.80
   4  -1   5    6.30    1.90
   4  -1   5    4.60    1.10
  -3   0  -5    2.10    1.10
  -3   0  -5   -0.50    1.40
  -3   0  -5   -1.50    4.20
  -3   0  -5   11.20    7.60
   3   0   5   -0.70    0.70
   3   0   5   -2.70    7.00
   3   0   5   -1.10    4.20
   3   0   5   -1.40    1.20
  -2  -1  -5   53.99    7.80
  -2  -1  -5   38.90    6.10
   2   1   5   34.80    7.50
   2   1   5   40.70    6.10
  -1  -2  -5  809.72  109.49
  -1  -2  -5  687.33  110.19
   1   2   5  779.82  109.99
   0  -3  -5  252.27   38.40
   0   3   5  265.47   38.30
   1  -4  -5  684.53   98.59
   2  -5  -5   88.99   19.50
   2  -5  -5  117.09   15.90
   2  -5  -5  100.59   15.30
  -2   5   5   95.69   15.30
  -2   5   5  116.99   15.40
  -2   5   5  113.19   15.70
  -2   5   5   88.69   19.00
   3  -6  -5    4.30    5.40
   3  -6  -5    4.40    1.00
  -3   6   5    3.00    1.70
  -3   6   5  -22.10   24.90
  -3   6   5    2.00    1.20
  -3   6   5    5.60    3.30
  -3   6   5    6.50   11.00
   4  -7  -5    7.40    1.60
  -4   7   5    6.50   14.30
  -4   7   5   10.00    4.30
  -4   7   5   -2.20   27.50
  -4   7   5    4.60    2.10
   5  -8  -5    8.60    5.30
   5  -8  -5    3.50    1.50
   5  -8  -5    0.70    2.30
   5  -8  -5    8.30    6.20
  -5   8   5    9.40    6.00
  -5   8   5   -6.30   16.50
  -5   8   5  -26.40   34.20
   6  -9  -5   86.29   11.90
   6  -9  -5   64.09   14.20
   6  -9  -5   87.49   12.40
  -6   9   5   62.99   27.00
  -6   9   5   66.29   14.00
   7 -10  -5  277.67   39.30
   7 -10  -5  262.57   40.90
  -7  10   5  246.58   51.79
   8 -11  -5  238.98   38.70
  -8  11   5  313.67   56.89
   9 -12  -5  162.98   28.10
   9 -12  -5  180.38   25.40
   9 -12  -5  187.78   26.40
  -9  12   5  143.59   29.10
  -9  12   5  100.59   55.29
  10 -13  -5   47.70   11.50
  10 -13  -5   15.90   19.80
  10 -13  -5   72.59   15.70
 -10  13   5  -11.70   61.89
 -10  13   5   72.09   11.50
  11 -14  -5   14.00   23.40
  11 -14  -5   46.40   15.10
 -11  14   5   25.20    8.60
 -11  14   5   48.30   78.89
  12 -15  -5   58.59   49.30
  16 -14   4   58.19   34.00
 -15  13  -4   15.70    8.70
  15 -13   4   37.00   26.00
 -14  12  -4   -8.00    5.90
  14 -12   4  -21.10   21.30
 -13  11  -4   12.30    5.10
  13 -11   4   52.99   15.50
  13 -11   4   13.80    4.90
  13 -11   4    1.20    7.60
 -12  10  -4    7.70    3.90
 -12  10  -4    6.50   10.80
 -12  10  -4   10.00   55.19
  12 -10   4    5.00   12.10
  12 -10   4  -15.10   59.99
  12 -10   4    8.10    5.40
 -11   9  -4   13.60    8.70
 -11   9  -4   -7.60   46.30
  11  -9   4   28.90   10.70
  11  -9   4  -13.80   44.40
  11  -9   4   16.90    4.90
 -10   8  -4   27.70    8.60
 -10   8  -4   35.90    5.70
 -10   8  -4   37.00   39.10
  10  -8   4  -11.20   40.40
  10  -8   4   15.40    8.90
  -9   7  -4   91.09   12.40
  -9   7  -4   69.69   13.90
   9  -7   4   79.29   14.40
   9  -7   4   14.90   36.50
  -8   6  -4  122.29   20.40
  -8   6  -4  137.69   19.60
   8  -6   4  141.79   20.60
  -7   5  -4  275.57   43.60
  -7   5  -4  295.77   43.40
   7  -5   4  327.27   43.70
  -6   4  -4   29.30   33.10
  -6   4  -4  110.89   15.30
  -6   4  -4   95.79   14.80
   6  -4   4  105.99   15.40
  -5   3  -4   13.60    2.30
  -5   3  -4   10.00   15.10
  -5   3  -4   13.20    3.10
  -5   3  -4   14.20    2.80
   5  -3   4   13.10    3.20
   5  -3   4   11.50    2.20
   5  -3   4    0.50   15.00
  -4   2  -4  595.84   77.59
   4  -2   4  480.35   77.69
  -3   1  -4 1227.08  162.78
  -3   1  -4 1090.89  163.48
   3  -1   4 1074.99  162.78
   2   0   4  780.22  105.99
   2   0   4  693.63  105.99
  -1  -1  -4  423.06   57.29
   1   1   4  372.76   57.29
   0  -2  -4  100.19   15.20
   0   2   4  124.59   16.00
   0   2   4   98.09   15.10
   0   2   4  104.89   15.20
   1  -3  -4    8.30    5.30
   1  -3  -4   16.70    2.40
   1  -3  -4   13.80    2.80
  -1   3   4   17.30    5.30
  -1   3   4   13.10    2.20
  -1   3   4   14.20    2.40
  -1   3   4   15.10    2.60
   2  -4  -4  179.88   24.70
   2  -4  -4  166.28   24.60
   2  -4  -4  174.48   25.30
  -2   4   4  144.29   26.50
  -2   4   4  175.18   24.70
   3  -5  -4   42.40    6.40
   3  -5  -4   23.60    5.30
   3  -5  -4   30.40    4.20
  -3   5   4   24.80    4.20
  -3   5   4   25.80   10.60
  -3   5   4   26.70   22.30
   4  -6  -4  351.96   48.10
   4  -6  -4  313.17   47.40
  -4   6   4  277.87   50.69
  -4   6   4  350.26   47.40
   5  -7  -4  353.26   53.49
   5  -7  -4  406.36   53.59
   5  -7  -4  328.77   52.89
  -5   7   4  363.66   52.89
  -5   7   4  432.36   58.49
   6  -8  -4  564.94   73.49
   6  -8  -4  489.75   73.39
   6  -8  -4  440.26   72.69
  -6   8   4  584.84   79.29
   7  -9  -4  225.88   34.70
   7  -9  -4  251.17   34.70
   7  -9  -4  238.18   33.40
  -7   9   4  211.48   33.40
   8 -10  -4  203.58   30.40
   8 -10  -4  222.88   31.90
  -8  10   4  205.88   32.20
   9 -11  -4   73.09   10.30
   9 -11  -4   48.10   14.00
   9 -11  -4   74.39   11.20
   9 -11  -4   40.90   14.80
  -9  11   4   74.99   15.30
  -9  11   4   50.29   40.20
  -9  11   4   59.29   10.70
  10 -12  -4   -1.10    3.50
  10 -12  -4    1.60    8.70
  10 -12  -4   14.20   15.60
  10 -12  -4    4.60    6.70
 -10  12   4    6.90    4.50
 -10  12   4    7.90   13.10
 -10  12   4  -54.69   51.49
  11 -13  -4    8.10    8.10
  11 -13  -4   24.90   19.10
  11 -13  -4    5.40   12.30
 -11  13   4   15.90   62.99
 -11  13   4   17.00    6.70
  12 -14  -4    1.00   13.90
  12 -14  -4   31.30   23.70
 -12  14   4  -36.00   86.29
 -13  15   4  -14.00   10.00
 -15  14  -3  -11.40    9.20
  15 -14   3   14.90   27.20
 -14  13  -3   -4.10   11.20
  14 -13   3    5.60   22.20
 -13  12  -3   89.19   67.19
 -13  12  -3   -1.60    5.40
  13 -12   3   -0.10   18.20
  13 -12   3   -3.80    9.20
 -12  11  -3   -3.30   12.60
 -12  11  -3    4.60    4.50
  12 -11   3   -5.60   14.50
  12 -11   3   -3.10    7.40
  12 -11   3   -1.10    7.10
  12 -11   3    2.30    3.70
 -11  10  -3   16.20   10.80
 -11  10  -3  -22.00   48.10
 -11  10  -3   34.60    5.70
  11 -10   3   46.90   55.69
  11 -10   3   32.80    7.60
  11 -10   3   22.80   12.30
  11 -10   3   23.50    5.30
  11 -10   3   20.40    6.80
 -10   9  -3   25.20   46.40
 -10   9  -3   47.50    8.60
 -10   9  -3   76.19   12.10
  10  -9   3   65.19   10.20
  10  -9   3   43.40   12.00
  10  -9   3  -52.19   50.59
  10  -9   3   53.89    9.40
  -9   8  -3    4.80    2.40
  -9   8  -3    8.90    6.40
  -9   8  -3   19.50   33.50
   9  -8   3    2.80    6.60
   9  -8   3    4.70    3.20
   9  -8   3   -5.20    4.30
   9  -8   3  -26.40   36.00
  -8   7  -3  116.49   20.20
  -8   7  -3  131.59   19.10
   8  -7   3  138.59   19.60
   8  -7   3  130.69   20.40
   7  -6   3  598.14   87.69
   7  -6   3  646.04   87.89
   7  -6   3  581.44   88.09
  -6   5  -3  758.42  114.79
  -6   5  -3  735.13  114.99
   6  -5   3  848.82  115.09
   6  -5   3  850.41  114.79
  -5   4  -3 1419.66  201.58
  -5   4  -3 1524.55  201.48
   5  -4   3 1239.88  201.38
   5  -4   3 1419.56  201.58
  -4   3  -3 1281.47  186.98
  -4   3  -3 1438.76  186.88
   4  -3   3 1176.18  186.98
  -3   2  -3  517.75   71.09
  -3   2  -3  494.85   70.99
   3  -2   3  466.55   70.99
  -2   1  -3    1.30    3.50
  -2   1  -3    2.30    0.70
  -2   1  -3    3.10    1.10
  -2   1  -3   -0.70    4.60
   2  -1   3    5.20    1.10
   2  -1   3    6.60    6.00
   2  -1   3   -1.00    6.30
  -1   0  -3    0.60    0.50
  -1   0  -3   -0.50    1.70
  -1   0  -3   -1.10    2.50
  -1   0  -3   -0.20    0.50
   1   0   3   -0.10    0.30
   1   0   3    0.30    0.40
   1   0   3    0.00    1.70
   1   0   3    3.10    2.00
   0  -1  -3    7.30    1.30
   1  -2  -3   19.10    3.20
   1  -2  -3   14.40    2.10
   1  -2  -3   16.90    4.30
  -1   2   3   14.20    2.10
  -1   2   3   12.30    2.20
  -1   2   3   21.30    3.90
   2  -3  -3  298.37   43.20
   2  -3  -3  283.37   43.20
   2  -3  -3  299.97   43.50
  -2   3   3  318.77   43.20
  -3   4   3 1600.24  214.38
  -3   4   3 1372.96  215.48
   4  -5  -3 1204.08  174.28
   4  -5  -3 1356.26  174.28
  -4   5   3 1072.49  174.48
  -5   6   3  404.96   62.19
   6  -7  -3   83.79   14.40
   6  -7  -3   80.29   13.20
   6  -7  -3   90.69   14.20
  -6   7   3   94.89   23.20
  -6   7   3   97.19   13.10
   7  -8  -3   28.30    5.30
   7  -8  -3   29.80    5.90
   7  -8  -3   50.79    8.40
   7  -8  -3   35.70    7.40
  -7   8   3   71.49   23.50
  -7   8   3    2.60   30.80
  -7   8   3   33.00    5.50
  -7   8   3   41.30    8.10
   8  -9  -3  101.29   19.70
   8  -9  -3  125.09   18.60
  -8   9   3  154.28   33.90
  -8   9   3   14.60   38.40
   9 -10  -3   66.39   12.70
   9 -10  -3   58.49   14.40
  -9  10   3   55.89   37.40
  -9  10   3  -34.40   47.60
  -9  10   3   90.69   14.00
  10 -11  -3   48.80   14.00
  10 -11  -3   32.40    9.20
 -10  11   3   48.10   44.60
 -10  11   3   30.50    6.40
  11 -12  -3   21.60   16.50
  11 -12  -3    0.50    3.90
  11 -12  -3    9.70   10.10
  11 -12  -3    7.50    7.00
 -11  12   3  -12.90   14.20
 -11  12   3   43.10   53.59
 -11  12   3   -2.30    4.80
  12 -13  -3  -16.50   19.20
  12 -13  -3   -7.80    9.60
  12 -13  -3    5.50    9.10
 -12  13   3  -11.80    5.80
 -12  13   3    7.80   69.79
  13 -14  -3  -10.70   26.50
 -13  14   3   65.89   89.49
  15 -15   2   47.60   34.30
 -14  14  -2  -11.20    8.20
  14 -14   2  -10.20   28.80
 -13  13  -2    1.20    6.70
 -13  13  -2   -7.70   82.29
  13 -13   2   -2.90   23.00
 -12  12  -2   10.30   62.59
 -12  12  -2   -2.30    5.20
  12 -12   2   -2.20    9.60
  12 -12   2   -0.10    9.00
  12 -12   2    5.10   16.50
 -11  11  -2   21.00   50.49
 -11  11  -2   18.80   12.50
 -11  11  -2   -0.30    3.90
  11 -11   2    9.40    3.80
  11 -11   2   12.00    7.20
  11 -11   2    6.60    6.60
  11 -11   2   18.80   13.20
 -10  10  -2   20.20   49.80
 -10  10  -2  149.59   22.70
 -10  10  -2  117.79   19.20
  10 -10   2  135.49   19.10
  10 -10   2  144.79   22.60
  -9   9  -2  352.36   48.90
   9  -9   2  354.86   49.30
   9  -9   2  340.57   48.80
   9  -9   2  287.07   50.09
  -8   8  -2  631.44   83.99
   8  -8   2  572.04   84.69
   8  -8   2  540.15   84.29
   7  -7   2  470.65   73.09
   7  -7   2  575.24   73.49
   7  -7   2  480.45   72.89
  -6   6  -2  463.35   69.29
  -6   6  -2  509.05   69.79
   6  -6   2  507.95   69.49
   6  -6   2  445.66   69.69
   5  -5   2  137.59   18.80
   5  -5   2  119.49   19.00
  -4   4  -2   61.29    9.10
  -4   4  -2   27.60   20.70
  -4   4  -2   57.29    8.50
   4  -4   2   54.79    8.80
   4  -4   2   65.09    9.10
   4  -4   2    9.40   19.90
  -3   3  -2  103.49   13.50
  -3   3  -2   84.79   13.70
   3  -3   2   89.29   13.50
   3  -3   2   94.19   13.60
  -2   2  -2   19.10    3.40
  -2   2  -2   23.20    3.30
  -2   2  -2   25.10    3.70
   2  -2   2   21.10    3.40
   2  -2   2    7.50    8.80
   2  -2   2   27.80    3.70
   2  -2   2   20.80    3.30
  -1   1  -2   22.90    3.40
   1  -1  -2  561.84   80.79
   2  -2  -2 7233.68  964.40
  -2   2   2 6185.68  964.50
   3  -3  -2   74.69   11.70
  -3   3   2   78.59   11.40
  -3   3   2   83.39   11.90
   4  -4  -2  100.29   15.00
   4  -4  -2  110.59   15.10
   4  -4  -2  102.89   14.60
  -4   4   2   85.69   15.00
  -4   4   2  105.49   15.40
   5  -5  -2  338.97   53.09
   5  -5  -2  388.56   52.69
   6  -6  -2  271.57   36.30
   6  -6  -2  234.28   36.90
  -6   6   2  241.78   36.90
   7  -7  -2  243.38   34.20
  -7   7   2  221.28   34.30
   8  -8  -2   47.70   10.30
   8  -8  -2   56.39    9.10
   8  -8  -2   75.49    9.70
   8  -8  -2   45.60   11.20
  -8   8   2   -6.40   30.10
  -8   8   2   63.49    9.20
  -8   8   2   71.69   11.50
  -8   8   2   41.80   25.80
   9  -9  -2   -4.10    5.30
   9  -9  -2   -0.70    7.90
  -9   9   2   11.90   28.90
  -9   9   2    6.60    2.90
  -9   9   2    4.80    7.20
  -9   9   2   27.70   75.29
  10 -10  -2    7.50    2.90
  10 -10  -2    1.30   11.10
  10 -10  -2    0.70    4.70
  10 -10  -2    6.20    6.50
 -10  10   2   18.90    9.50
 -10  10   2  -23.00   46.10
 -10  10   2  -19.80   47.40
  11 -11  -2   -0.30    3.50
  11 -11  -2   10.70    7.10
  11 -11  -2    7.50    6.40
  11 -11  -2   -6.00   13.60
 -11  11   2    7.10    3.90
 -11  11   2   19.30   47.90
 -11  11   2    8.40   11.20
  12 -12  -2   10.80    9.90
  12 -12  -2   12.50   16.90
 -12  12   2  -28.60   60.09
  13 -13  -2   45.70   22.90
  13 -13  -2   47.90   13.40
  13 -13  -2   29.10   13.20
 -13  13   2   61.79   75.79
  14 -14  -2   11.50   25.00
 -14  14   2   31.20    9.60
 -14  14   2   90.19   94.39
  14 -15   1   -4.60   28.70
 -13  14  -1   -3.50    7.70
  13 -14   1   10.00   26.40
 -12  13  -1  188.78   83.49
  12 -13   1   48.30   21.80
 -11  12  -1   78.39   64.29
 -11  12  -1  142.59   19.80
  11 -12   1  145.89   25.70
  11 -12   1  120.99   19.40
  11 -12   1  105.99   21.80
 -10  11  -1  251.47   35.10
 -10  11  -1  261.47   63.19
 -10  11  -1  255.97   37.80
  10 -11   1  212.08   36.00
  -9  10  -1  320.47   56.59
   9 -10   1  231.78   32.00
   9 -10   1  178.88   34.10
  -8   9  -1   25.60   38.10
  -8   9  -1   68.69   12.10
   8  -9   1   55.39   11.30
   8  -9   1   54.69   10.10
  -7   8  -1    3.90    2.10
  -7   8  -1    4.90    5.80
  -7   8  -1  -25.10   28.80
   7  -8   1    2.30    4.00
   7  -8   1    4.30    2.00
   7  -8   1    8.00    3.30
   7  -8   1   -4.20    5.60
  -6   7  -1   32.30    7.50
  -6   7  -1   -9.80   26.90
   6  -7   1   39.40    5.80
   6  -7   1   31.50    6.70
   6  -7   1  -14.40   26.00
   6  -7   1   52.49    7.70
   5  -6   1  106.09   13.80
   5  -6   1   83.59   13.40
   5  -6   1   83.89   14.10
  -4   5  -1   11.70   20.30
  -4   5  -1   34.70    5.40
  -4   5  -1   43.50    6.70
   4  -5   1   28.80    6.40
   4  -5   1   39.20    5.60
   4  -5   1   -7.80   18.10
   4  -5   1   35.80    6.20
  -3   4  -1  558.74   80.59
  -2   3  -1 2185.08  314.27
   1  -2   1  844.42  121.49
   0  -1   1   -0.10    0.20
   0  -1   1   -5.90    4.50
   3  -2  -1 1857.31  267.07
  -4   3   1  944.41  147.19
  -4   3   1 1102.39  147.29
   5  -4  -1  355.36   47.70
  -5   4   1  310.47   47.60
  -5   4   1  322.77   47.40
   6  -5  -1  114.99   16.60
   6  -5  -1   97.09   15.90
  -6   5   1  117.99   16.00
  -6   5   1  113.79   16.60
   7  -6  -1   17.90    5.30
   7  -6  -1   20.80    4.50
   7  -6  -1   12.00    2.50
   7  -6  -1  -13.20   24.70
  -7   6   1   -2.10   23.30
   8  -7  -1   42.10    7.10
   8  -7  -1  -10.40   26.20
   8  -7  -1   41.10    7.80
  -8   7   1    8.80   27.60
  -8   7   1   32.40    5.60
   9  -8  -1    1.70    1.80
   9  -8  -1    2.00    3.40
   9  -8  -1  -11.60   23.60
   9  -8  -1    5.30    4.60
   9  -8  -1  -19.30   31.50
   9  -8  -1    4.80    6.80
  -9   8   1   13.00    6.40
  -9   8   1    0.10    2.10
  -9   8   1   -8.00   33.10
  10  -9  -1   -0.10    9.40
  10  -9  -1   10.00    3.10
  10  -9  -1   18.20    5.10
  10  -9  -1    9.40    6.30
  10  -9  -1  -27.10   27.50
 -10   9   1   74.69   43.00
 -10   9   1   22.20    8.10
 -10   9   1   17.90    3.50
  11 -10  -1  144.29   22.00
  11 -10  -1  154.98   23.70
  11 -10  -1  121.29   25.60
 -11  10   1  119.99   52.79
 -11  10   1  154.48   25.00
 -11  10   1  158.08   22.10
  12 -11  -1  188.38   32.30
  12 -11  -1  171.18   25.20
  12 -11  -1  160.48   27.10
 -12  11   1  176.18   25.40
 -12  11   1  161.88   28.80
 -12  11   1  139.19   57.79
  13 -12  -1  110.49   19.00
  13 -12  -1  110.79   24.50
 -13  12   1   82.99   15.50
 -13  12   1  144.59   66.79
  14 -13  -1   53.69   23.40
 -14  13   1   69.09   84.69
  15 -14  -1   18.80   28.80
 -15  14   1    9.00    9.00
  13 -15   0   68.39   33.60
 -12  14   0   74.69   13.80
  12 -14   0   70.79   25.10
 -11  13   0   32.70    7.60
 -11  13   0   87.99   69.59
  11 -13   0  -20.70   18.40
  11 -13   0   37.30   12.00
 -10  12   0  -19.30   51.79
 -10  12   0   16.50    4.90
 -10  12   0    7.90   13.80
  10 -12   0   11.80    7.90
  10 -12   0   -7.00    7.70
  10 -12   0   27.60   15.10
  -9  11   0   58.09    9.10
  -9  11   0  -35.40   53.69
   9 -11   0   64.89   10.20
   9 -11   0   38.10    8.40
   9 -11   0   52.79   10.90
   9 -11   0   57.79   14.30
  -8  10   0   76.69   41.90
  -8  10   0  119.29   19.20
   8 -10   0   99.09   16.10
   8 -10   0  123.59   17.20
   8 -10   0  104.59   17.60
  -7   9   0   80.29   12.80
  -7   9   0  105.79   30.10
  -7   9   0  -20.80   34.70
   7  -9   0   69.89   11.30
   7  -9   0   60.29    9.50
   7  -9   0   50.19   11.80
  -6   8   0   48.80   32.60
  -6   8   0   46.50   25.70
  -6   8   0   47.40    8.90
  -6   8   0   46.70    6.60
   6  -8   0   37.90    6.40
   6  -8   0   42.60    7.80
   6  -8   0   35.20    8.40
   6  -8   0   35.40    8.50
  -5   7   0    8.90    5.00
  -5   7   0  -22.40   34.70
  -5   7   0    3.20   18.20
   5  -7   0    7.00    2.80
   5  -7   0   12.10    2.00
   5  -7   0   13.40    4.20
   5  -7   0    2.50    4.60
  -4   6   0  179.88   24.30
   4  -6   0  155.28   24.20
   3  -5   0  186.78   28.30
   3  -5   0  208.28   28.70
   2  -4   0  325.17   51.29
   2  -4   0  383.36   51.69
  -1   3   0  236.68   32.30
   1  -3   0  210.48   32.40
   0  -2   0 2285.37  343.37
   0  -2   0 2492.05  343.37
   1   1   0    1.40    0.50
  -1  -1   0    0.40    1.50
  -1  -1   0    0.00    0.20
   3  -1   0  541.95   77.99
   4  -2   0  376.96   56.19
  -4   2   0  398.66   56.19
  -4   2   0  393.86   56.19
   5  -3   0  100.89   13.50
  -5   3   0   80.99   13.50
   6  -4   0  -10.50   17.60
   6  -4   0   10.30    3.20
  -6   4   0   -3.90   16.60
   7  -5   0   -2.60    3.60
   7  -5   0   16.20   22.10
   7  -5   0   -1.90    2.80
   7  -5   0    2.60    1.60
  -7   5   0   -4.60   19.90
  -7   5   0   -4.50    4.10
  -7   5   0    4.90    3.30
  -7   5   0    0.90    1.40
   8  -6   0  127.69   20.50
   8  -6   0  133.09   20.00
  -8   6   0  120.69   20.50
  -8   6   0  148.89   19.60
  -8   6   0  127.29   20.60
   9  -7   0  485.65   66.49
   9  -7   0  486.85   66.69
   9  -7   0  417.66   67.19
  -9   7   0  447.86   67.39
  -9   7   0  459.75   66.59
  10  -8   0  460.55   60.19
  10  -8   0  379.06   59.49
 -10   8   0  391.26   58.99
 -10   8   0  419.36   59.79
  11  -9   0  346.37   52.69
  11  -9   0  336.07   53.69
 -11   9   0  385.96   52.09
  12 -10   0  101.69   24.00
  12 -10   0  124.09   21.20
 -12  10   0  143.99   19.70
 -12  10   0   55.89   57.69
  13 -11   0    9.10    8.70
  13 -11   0    7.80    4.00
  13 -11   0    0.80    6.90
  13 -11   0   22.10   17.00
 -13  11   0   66.99   54.69
 -13  11   0    9.00    5.80
 -13  11   0  -12.10   13.40
  14 -12   0   10.20   20.50
  14 -12   0    6.10   11.40
  14 -12   0   15.40    9.70
 -14  12   0   26.30   69.99
 -14  12   0   -1.70    5.70
  15 -13   0   42.20   26.70
  16 -14   0   20.80   37.80
 -16  14   0   17.20    9.60
  13 -16  -1    7.50   35.50
 -12  15   1  -16.00    9.90
 -11  14   1  128.09   84.09
 -11  14   1   30.40   13.50
  11 -14  -1  -20.90   22.70
 -10  13   1  -46.30   64.89
 -10  13   1   37.10    7.40
  10 -13  -1   33.30   11.10
  10 -13  -1   20.30    9.70
  10 -13  -1   19.50   19.00
  -9  12   1   34.60   13.60
  -9  12   1    5.50   48.90
  -9  12   1   38.70    7.00
   9 -12  -1   30.70    9.90
   9 -12  -1   37.70    6.40
   9 -12  -1   26.50    9.10
   9 -12  -1   23.70   14.30
  -8  11   1    7.80    3.40
  -8  11   1  -19.30   52.69
  -8  11   1  -10.20    9.90
  -8  11   1  -23.20   46.50
   8 -11  -1   -2.50    3.00
   8 -11  -1    5.70    5.90
   8 -11  -1    2.20    6.80
  -7  10   1    4.60   30.70
  -7  10   1  -39.80   43.90
  -7  10   1   25.90    9.50
   7 -10  -1    4.50    6.20
   7 -10  -1   25.50    8.90
   7 -10  -1    3.50    4.40
   7 -10  -1    7.30    2.70
  -6   9   1   74.19   13.70
  -6   9   1  115.19   29.30
  -6   9   1   -7.40   36.50
   6  -9  -1   65.89   11.80
   6  -9  -1   73.79   13.80
   6  -9  -1   85.29   11.30
  -5   8   1   37.30    5.70
  -5   8   1   55.39   22.20
  -5   8   1  -29.60   36.30
   5  -8  -1   28.80    7.40
   5  -8  -1   33.40    5.40
  -4   7   1    0.50   31.80
  -4   7   1   16.20   16.80
  -4   7   1   39.00    7.10
  -4   7   1   37.30    5.40
   4  -7  -1   27.00    5.10
   4  -7  -1   33.20    5.60
   4  -7  -1   38.20    6.90
   4  -7  -1   45.70    7.20
  -3   6   1 1031.60  148.39
   3  -6  -1 1031.20  148.69
   2  -5  -1 1839.82  249.28
   2  -5  -1 1727.53  249.28
   2  -5  -1 1631.94  249.48
  -1   4   1 6300.17  946.01
   1  -4  -1 6860.51  945.81
   0   3   1 6224.18  869.01
   0   3   1 6189.88  869.11
   0  -3  -1 6036.20  869.11
   0  -3  -1 5735.53  869.01
   1   2   1  704.93   99.59
   1   2   1  717.73   99.19
  -1  -2  -1  645.84   99.09
   2   1   1   18.30    3.70
   3   0   1   -0.80    0.70
   3   0   1   -0.60    2.10
   3   0   1    0.50    0.50
  -3   0  -1    0.10    0.30
  -3   0  -1    0.50    0.80
  -3   0  -1    1.30    2.10
   4  -1   1  670.73   94.79
  -4   1  -1  645.14   95.49
   5  -2   1   28.90    4.50
   5  -2   1   16.20   11.80
  -5   2  -1   27.60    4.50
  -5   2  -1    9.50   10.70
   6  -3   1  509.75   79.49
   6  -3   1  589.64   79.49
  -6   3  -1  554.24   79.49
   7  -4   1 1022.40  146.49
   7  -4   1 1008.60  146.59
  -7   4  -1  925.31  146.49
  -7   4  -1 1108.79  146.29
   8  -5   1 1356.66  209.78
  -8   5  -1 1486.75  209.68
  -8   5  -1 1525.45  209.78
   9  -6   1  635.44   94.19
  -9   6  -1  702.73   94.19
  -9   6  -1  614.54   94.19
  10  -7   1  102.39   13.50
  10  -7   1   77.39   14.60
 -10   7  -1   84.99   12.40
 -10   7  -1   57.79   14.60
 -10   7  -1   79.59   14.10
 -10   7  -1   12.10   55.99
  11  -8   1   -0.20    7.60
  11  -8   1    5.20    2.60
  11  -8   1    3.40    3.70
  11  -8   1   16.20    5.10
  11  -8   1  -29.10   32.10
 -11   8  -1    3.30    7.00
 -11   8  -1   12.00    2.80
 -11   8  -1  -12.40    9.30
 -11   8  -1    6.90   35.60
  12  -9   1   91.89   13.70
  12  -9   1   19.90   49.00
  12  -9   1  100.59   17.70
 -12   9  -1   83.39   14.10
 -12   9  -1  114.59   17.20
 -12   9  -1   41.20   45.40
  13 -10   1  118.19   26.50
  13 -10   1  162.18   22.30
 -13  10  -1  137.29   22.70
 -13  10  -1  186.58   25.80
  14 -11   1   33.00   10.00
  14 -11   1    7.60   17.40
 -14  11  -1   39.10    7.40
  15 -12   1  -14.00   19.60
  15 -12   1   -1.30   10.80
 -15  12  -1    2.90    6.60
 -15  12  -1   16.60   72.39
  16 -13   1   11.10   26.80
 -16  13  -1   70.19  162.38
 -16  13  -1  -10.30    7.40
  17 -14   1   19.20   32.90
  12 -16  -2    5.90   45.70
 -11  15   2   -3.70    8.60
  11 -15  -2  -33.60   26.90
 -10  14   2  -46.50   82.69
 -10  14   2    5.20    6.90
  10 -14  -2   -1.00   19.00
  -9  13   2   86.69   59.19
  -9  13   2   -4.10    5.80
   9 -13  -2   -5.70   15.70
   9 -13  -2   -8.30    9.50
   9 -13  -2    0.90    8.30
  -8  12   2  -60.29   43.00
  -8  12   2   -3.20    4.10
  -8  12   2    1.90   11.00
   8 -12  -2   -0.10    3.40
   8 -12  -2   -5.20   11.60
   8 -12  -2    2.80    8.30
   8 -12  -2    4.70    6.00
  -7  11   2   46.80   53.89
  -7  11   2    0.40    9.20
  -7  11   2   37.10   38.80
  -7  11   2   18.00    4.10
   7 -11  -2    6.00    5.70
   7 -11  -2   23.00    8.10
   7 -11  -2    1.40    9.50
  -6  10   2   25.10   42.50
  -6  10   2   61.09   12.40
  -6  10   2   92.09   33.00
  -6  10   2   58.89   10.00
   6 -10  -2   51.39    9.60
   6 -10  -2   79.59   12.80
   6 -10  -2   89.29   13.50
   6 -10  -2   74.89   10.80
  -5   9   2  271.77   48.60
   5  -9  -2  266.37   37.10
   5  -9  -2  222.28   38.10
   5  -9  -2  272.37   38.10
  -4   8   2  725.93  108.39
  -4   8   2  666.53  111.99
   4  -8  -2  825.42  108.29
  -3   7   2  627.44  103.69
  -3   7   2  702.93  100.79
   3  -7  -2  744.63  100.49
   3  -7  -2  690.23  100.39
  -2   6   2  681.83   94.09
  -2   6   2  628.44   91.49
   2  -6  -2  608.74   91.69
  -1   5   2  355.26   50.99
  -1   5   2  329.87   52.99
  -1   5   2  380.96   51.29
   1  -5  -2  344.77   50.99
   0   4   2   57.59   11.30
   0   4   2   47.50    8.80
   0  -4  -2   62.29    8.40
   0  -4  -2   70.39   12.10
   1   3   2  414.36   63.49
  -1  -3  -2  422.66   62.79
  -1  -3  -2  462.35   62.59
  -1  -3  -2  438.16   63.59
   2   2   2   18.00    4.70
   2   2   2   22.10    3.20
  -2  -2  -2   22.20    3.20
  -2  -2  -2   18.70    3.40
  -2  -2  -2   13.10    4.90
   3   1   2  102.19   16.10
  -3  -1  -2  108.79   15.40
   4   0   2  396.46   53.69
  -4   0  -2  343.97   54.19
   5  -1   2   76.19   12.40
   5  -1   2   89.49   12.20
  -5   1  -2   94.79   12.20
  -5   1  -2   74.99   12.40
  -5   1  -2   77.69   14.20
  -6   2  -2  654.73  103.29
  -6   2  -2  692.93  103.19
  -6   2  -2  805.42  103.39
  -7   3  -2   55.49    8.80
   8  -4   2   68.69   11.00
  -8   4  -2   77.09   12.00
  -8   4  -2   71.09   11.70
  -8   4  -2   82.99   11.10
  -9   5  -2  242.48   37.40
  -9   5  -2  270.97   37.50
  10  -6   2  275.97   41.70
  10  -6   2  302.17   41.30
 -10   6  -2  263.37   41.30
 -10   6  -2  314.97   42.00
 -10   6  -2  273.67   42.10
  11  -7   2  225.78   32.90
 -11   7  -2  219.18   32.20
  12  -8   2    7.10    4.00
  12  -8   2   27.30    9.20
  12  -8   2   31.70   38.70
 -12   8  -2   13.20    7.60
 -12   8  -2   14.50    3.50
 -12   8  -2   16.00   10.20
 -12   8  -2    9.70   39.00
  13  -9   2   12.40    3.50
  13  -9   2    0.30    5.00
  13  -9   2  -11.70   55.79
  13  -9   2    1.30   10.90
 -13   9  -2   -0.90    3.50
 -13   9  -2    7.60    9.40
 -13   9  -2  -21.30   45.90
  14 -10   2    0.60    6.50
  14 -10   2  -10.50   13.60
  14 -10   2   -0.80    3.70
 -14  10  -2  -11.80   10.60
 -14  10  -2    2.90    4.30
  15 -11   2   12.00   19.10
  15 -11   2    1.20    8.40
 -15  11  -2    2.80    5.00
  16 -12   2  -16.10   22.40
 -16  12  -2   10.30    7.00
  17 -13   2   22.80   26.80
 -17  13  -2   -1.40    8.60
  18 -14   2   67.79   38.00
  11 -16  -3  -36.70   34.00
 -10  15   3  -12.10    8.40
  10 -15  -3    7.80   25.90
  -9  14   3    3.60    6.90
  -9  14   3  -17.10   73.89
   9 -14  -3    4.70   12.30
   9 -14  -3   27.20   20.10
  -8  13   3   81.89   57.89
   8 -13  -3   33.60   12.70
   8 -13  -3   32.00   16.30
  -7  12   3  200.48   53.09
  -7  12   3  177.88   28.50
  -7  12   3  148.69   25.30
   7 -12  -3  199.18   25.20
   7 -12  -3  172.48   25.60
   7 -12  -3  132.99   28.10
   7 -12  -3  177.88   28.60
  -6  11   3  107.09   65.29
  -6  11   3  330.77   58.69
   6 -11  -3  234.78   35.60
   6 -11  -3  270.47   38.30
   6 -11  -3  249.58   37.20
  -5  10   3  546.15   81.59
   5 -10  -3  490.75   71.99
   5 -10  -3  480.25   71.19
  -4   9   3  227.88   37.60
  -4   9   3  147.69   23.50
   4  -9  -3  173.58   24.70
  -3   8   3   18.30   16.50
  -3   8   3   -4.50   38.80
  -3   8   3    9.60    2.70
   3  -8  -3    9.70    1.90
   3  -8  -3   10.90    5.70
   3  -8  -3    4.90    2.70
   3  -8  -3   13.20    5.10
  -2   7   3  116.89   17.90
  -2   7   3   90.49   23.50
   2  -7  -3  125.79   18.10
   2  -7  -3  128.29   17.40
   2  -7  -3  112.19   17.20
  -1   6   3  459.45   63.59
  -1   6   3  413.76   65.79
   1  -6  -3  483.75   63.19
   1  -6  -3  390.96   63.29
   0   5   3   26.50    4.60
   0   5   3   15.80    8.80
   0   5   3   35.90    4.90
   0  -5  -3   37.80    4.90
   0  -5  -3   23.10   10.50
   0  -5  -3   30.70    4.60
   0  -5  -3   28.10    5.50
   1   4   3   52.29   13.50
   1   4   3   72.09   11.30
   1   4   3   78.09   11.00
  -1  -4  -3   78.69   11.00
  -1  -4  -3   89.79   14.40
   2   3   3   36.20    5.30
   2   3   3   32.30    7.70
  -2  -3  -3   38.80    5.70
  -2  -3  -3   38.80    7.90
   3   2   3  518.85   78.19
  -3  -2  -3  567.64   78.19
   4   1   3  427.16   61.89
   4   1   3  431.56   61.19
  -4  -1  -3  415.16   61.89
   5   0   3   -2.80    5.20
   5   0   3   -1.60    1.30
   5   0   3    2.10    0.80
   5   0   3    8.50    5.70
  -5   0  -3    3.50    4.60
  -5   0  -3   -1.10    1.30
   6  -1   3   95.19   15.00
  -6   1  -3   69.79   10.50
  -6   1  -3   67.69   10.30
   7  -2   3  932.11  134.19
   8  -3   3 1040.40  162.98
  -8   3  -3 1077.29  162.98
  -8   3  -3 1262.17  162.78
  -8   3  -3 1146.89  165.18
   9  -4   3 1135.99  168.18
  -9   4  -3 1220.18  168.48
  -9   4  -3 1153.38  168.18
  10  -5   3  415.76   55.19
 -10   5  -3  343.27   55.59
  11  -6   3  -47.70   28.90
  11  -6   3   22.10    6.90
 -11   6  -3   18.70    6.60
 -11   6  -3  -42.10   28.20
 -11   6  -3   21.80    6.40
  12  -7   3   28.50    8.90
  12  -7   3  -26.30   34.10
 -12   7  -3   19.30    4.20
 -12   7  -3   16.30   32.00
 -12   7  -3   28.30    7.30
  13  -8   3   -1.90    9.60
  13  -8   3    0.90   48.00
  13  -8   3  -12.00    4.00
 -13   8  -3    5.70   12.00
 -13   8  -3   -6.90    2.90
 -13   8  -3  -10.90    7.90
 -13   8  -3  -24.50   40.30
  14  -9   3  -13.80   12.10
  14  -9   3    1.30    4.50
 -14   9  -3  -22.70   41.90
 -14   9  -3   -5.60   10.00
 -14   9  -3    2.90    3.60
  15 -10   3   80.39   18.90
 -15  10  -3   64.49   11.40
 -15  10  -3   57.69   16.20
  16 -11   3   91.29   18.70
  16 -11   3   95.79   25.50
 -16  11  -3  133.89   18.30
  17 -12   3   86.79   28.30
 -18  13  -3    3.10    9.60
  19 -14   3   68.69   50.79
  10 -16  -4   23.90   30.50
   9 -15  -4   30.00   22.90
  -8  14   4   87.39   16.40
  -8  14   4  156.08   69.29
   8 -14  -4  105.29   19.90
   8 -14  -4   95.79   22.90
  -7  13   4  106.59   51.49
  -7  13   4   89.09   14.40
   7 -13  -4   61.99   17.40
   7 -13  -4   89.99   13.50
   7 -13  -4   89.39   20.90
  -6  12   4    8.40    4.50
  -6  12   4   22.70   41.80
  -6  12   4    2.70    9.80
   6 -12  -4   10.50    3.70
   6 -12  -4    8.40    6.00
   6 -12  -4   12.90   11.90
   6 -12  -4   -0.30    9.10
  -5  11   4   11.80    7.90
  -5  11   4   11.30    3.90
  -5  11   4  -50.89   56.39
  -5  11   4  -29.20   29.60
   5 -11  -4   -0.50    9.50
   5 -11  -4    3.60    4.70
   5 -11  -4   -2.30    2.30
   5 -11  -4   -0.70    8.00
  -4  10   4  158.18   31.60
  -4  10   4   15.10   52.49
   4 -10  -4  114.99   18.90
   4 -10  -4  104.59   15.80
  -3   9   4  143.29   21.40
  -3   9   4  -24.70   69.69
   3  -9  -4  134.09   22.00
   3  -9  -4  136.39   22.10
   3  -9  -4  141.19   20.10
  -2   8   4   -4.60   36.00
  -2   8   4    6.20   16.40
   2  -8  -4   10.50    6.70
   2  -8  -4   15.40    5.10
   2  -8  -4   13.00    2.30
  -1   7   4    0.20    1.80
  -1   7   4   -1.60    1.20
  -1   7   4    3.20   10.90
  -1   7   4   -3.20    3.40
   1  -7  -4    5.60    3.90
   1  -7  -4    1.20    1.90
   1  -7  -4   -1.30    0.90
   0   6   4  599.24   79.29
   0  -6  -4  516.85   81.79
   0  -6  -4  491.85   79.29
   0  -6  -4  585.04   79.39
   1   5   4  263.57   39.70
  -1  -5  -4  265.27   39.40
  -1  -5  -4  294.97   39.80
   2   4   4  175.58   23.70
   2   4   4  148.29   25.70
   2   4   4  159.38   23.60
   3   3   4   19.50    3.70
   3   3   4   20.70    3.50
  -3  -3  -4   22.90    3.50
   4   2   4  590.74   85.99
  -4  -2  -4  588.94   85.89
  -4  -2  -4  612.84   86.79
   5   1   4 6097.59  860.21
  -5  -1  -4 5892.61  860.11
  -5  -1  -4 5961.80  860.11
   6   0   4 1825.92  263.57
   7  -1   4 2171.28  323.67
   7  -1   4 2303.87  325.07
  -7   1  -4 2280.07  323.67
   8  -2   4   81.99   11.80
   8  -2   4   83.89   12.30
  -8   2  -4   70.29   12.30
  -8   2  -4   84.19   11.90
   9  -3   4  230.58   31.20
   9  -3   4  209.08   31.50
  -9   3  -4  189.78   31.60
  -9   3  -4  226.68   31.30
  10  -4   4    1.10    3.80
  10  -4   4  -24.40   22.10
 -10   4  -4    5.00   19.10
 -10   4  -4   -7.00    3.60
 -10   4  -4    1.70    2.00
 -10   4  -4    1.10    4.60
 -10   4  -4  -24.80   27.60
  11  -5   4    4.10   24.70
  11  -5   4   -7.60    4.50
 -11   5  -4    6.50    2.20
 -11   5  -4    8.50   24.00
 -11   5  -4   -2.40    5.50
 -11   5  -4    4.60    5.10
  12  -6   4   12.50    3.20
  12  -6   4   10.20    6.30
  12  -6   4    3.50   30.70
 -12   6  -4    8.50    2.90
 -12   6  -4   26.10    6.70
 -12   6  -4  -15.40   28.40
 -12   6  -4   12.60    6.90
  13  -7   4   88.89   13.50
  13  -7   4   96.29   16.30
  13  -7   4   11.80   43.00
 -13   7  -4  107.59   15.70
 -13   7  -4   79.19   15.80
 -13   7  -4   11.80   33.40
 -13   7  -4   87.89   13.40
  14  -8   4   78.29   16.40
  14  -8   4   91.79   12.70
 -14   8  -4  110.29   17.10
 -14   8  -4   66.39   12.40
 -14   8  -4   32.90   42.00
  15  -9   4  177.88   35.40
 -15   9  -4  193.98   32.90
 -15   9  -4  213.48   30.10
  16 -10   4  121.39   26.80
  16 -10   4  150.98   20.60
 -16  10  -4  109.49   19.80
  17 -11   4   27.90   22.60
 -17  11  -4   14.50    6.80
  18 -12   4   30.60   26.30
  19 -13   4   26.40   33.20
   9 -16  -5    0.60   26.90
  -8  15   5    2.80    8.00
  -8  15   5  -85.99   85.29
   8 -15  -5   26.40   23.80
   8 -15  -5    3.10   13.30
  -7  14   5   33.90    8.10
  -7  14   5   47.10   64.99
   7 -14  -5   39.40   18.80
   7 -14  -5   24.60   14.80
   7 -14  -5   21.70    9.40
  -6  13   5   34.10   48.60
   6 -13  -5  100.39   17.30
   6 -13  -5   65.89   11.90
   6 -13  -5   68.79   17.80
  -5  12   5   28.40   11.90
  -5  12   5   75.59   40.00
   5 -12  -5   37.00   12.30
   5 -12  -5   27.90   11.50
   5 -12  -5   32.10    5.60
  -4  11   5   17.80   29.90
  -4  11   5  -21.10   55.99
  -4  11   5    1.90    8.70
   4 -11  -5   15.50    8.60
   4 -11  -5    1.10    4.30
   4 -11  -5   18.20   10.00
   4 -11  -5    2.10    2.40
  -3  10   5    3.80   49.00
  -3  10   5    6.00    3.70
  -3  10   5    6.00   22.50
  -3  10   5    7.30    6.70
   3 -10  -5    0.50    3.40
   3 -10  -5   14.50    7.20
   3 -10  -5   -1.90    7.90
   3 -10  -5    2.70    2.10
  -2   9   5   18.20    6.00
  -2   9   5   18.30    3.60
  -2   9   5  117.09   54.19
  -2   9   5   40.20   19.50
   2  -9  -5   31.00    7.90
   2  -9  -5   11.70    2.70
   2  -9  -5    7.80    6.50
  -1   8   5   55.39   16.80
  -1   8   5   18.40    2.80
  -1   8   5    9.50    3.30
   1  -8  -5   18.90    5.40
   1  -8  -5   14.90    2.60
   0   7   5   24.80    4.90
   0   7   5   17.40    2.90
   0  -7  -5   15.60    3.40
   0  -7  -5   26.80   14.60
   1   6   5  619.44   93.09
  -1  -6  -5  678.73   93.59
  -1  -6  -5  609.84   91.29
   2   5   5  847.72  126.39
   2   5   5  849.41  126.19
   2   5   5  958.70  127.79
  -2  -5  -5  813.62  126.39
  -2  -5  -5  942.81  127.99
   3   4   5 1394.86  209.08
   3   4   5 1348.97  208.08
  -3  -4  -5 1606.74  209.38
   4   3   5  579.84   91.79
   4   3   5  595.04   90.89
  -4  -3  -5  650.03   90.89
  -4  -3  -5  706.03   92.19
   5   2   5  156.08   24.80
  -5  -2  -5  186.48   24.90
   6   1   5   65.39   13.40
  -6  -1  -5   61.99   10.30
  -6  -1  -5   94.69   13.50
  -6  -1  -5   72.19   10.40
   7   0   5   -0.10    1.10
   7   0   5    4.20   10.00
   7   0   5   -3.10    8.40
   7   0   5   -1.80    1.80
  -7   0  -5   -7.10    5.90
  -7   0  -5   -3.50    2.10
   8  -1   5   -0.50    2.30
   8  -1   5    1.50   10.20
   8  -1   5   -8.00    9.50
  -8   1  -5    6.00    2.80
  -8   1  -5    1.20    8.80
  -8   1  -5    2.60    1.20
  -8   1  -5  -10.30   11.40
   9  -2   5   87.29   13.40
   9  -2   5  100.79   13.90
  -9   2  -5   86.49   14.00
  -9   2  -5   91.49   13.50
  -9   2  -5  135.19   27.30
  10  -3   5   33.80    6.00
  10  -3   5   27.60    5.00
  10  -3   5   14.80   20.10
 -10   3  -5   45.90   16.50
 -10   3  -5   33.20    6.40
 -10   3  -5   61.39   21.70
 -10   3  -5   35.40    6.80
  11  -4   5  269.37   42.80
 -11   4  -5  277.07   49.60
 -11   4  -5  316.37   42.40
  12  -5   5  190.68   29.60
  12  -5   5  220.48   30.70
 -12   5  -5  202.48   30.50
 -12   5  -5  166.48   39.80
 -12   5  -5  222.28   30.60
  13  -6   5  105.49   21.20
  13  -6   5  145.09   19.50
 -13   6  -5  105.39   20.90
 -13   6  -5  109.29   21.30
 -13   6  -5   99.49   34.20
 -13   6  -5  154.88   19.60
  14  -7   5  -17.80   47.40
  15  -8   5   25.90   13.20
  15  -8   5   42.70   56.69
 -15   8  -5  -24.20   39.90
  16  -9   5   53.19   15.40
 -16   9  -5   21.50    6.40
 -16   9  -5   28.00   12.90
  17 -10   5   92.29   21.40
 -17  10  -5   54.09   10.80
  18 -11   5   10.00   23.20
 -18  11  -5   34.40    9.30
 -19  12  -5   -4.10    9.40
  20 -13   5   47.00   35.10
   8 -16  -6   24.10   49.10
  -7  15   6   -3.50    8.60
  -7  15   6    2.10   80.69
   7 -15  -6   18.90   22.30
   7 -15  -6   17.70   16.50
  -6  14   6  -59.89   61.69
  -6  14   6    5.50    6.70
   6 -14  -6   -9.10   17.60
   6 -14  -6   -8.00   13.00
   6 -14  -6   22.80    8.00
  -5  13   6   -0.10    5.50
  -5  13   6  -43.50   45.70
   5 -13  -6    1.20   11.60
   5 -13  -6  -22.70   12.70
   5 -13  -6    2.80    6.40
   5 -13  -6   -1.70    3.70
  -4  12   6   22.20   10.90
  -4  12   6   11.20   37.20
  -4  12   6   -2.00    4.90
   4 -12  -6   -2.20    2.60
   4 -12  -6    3.60   10.30
   4 -12  -6    3.90    4.60
   4 -12  -6    2.60   10.30
  -3  11   6   17.10   29.30
  -3  11   6  -39.30   57.09
  -3  11   6   14.20    8.30
   3 -11  -6    8.50    9.90
   3 -11  -6   -3.20    3.60
   3 -11  -6   -0.50    8.40
   3 -11  -6   -0.60    2.20
  -2  10   6  211.68   47.70
   2 -10  -6  269.87   36.50
   2 -10  -6  240.98   36.70
  -1   9   6  339.67   51.79
  -1   9   6  317.37   44.20
  -1   9   6  315.37   45.00
   1  -9  -6  281.67   44.10
   0   8   6  371.46   66.29
   0   8   6  401.56   62.79
   0   8   6  501.05   62.39
   0  -8  -6  384.46   67.69
   0  -8  -6  442.66   62.29
   1   7   6  962.20  127.59
   1   7   6  776.02  129.49
   1   7   6  921.61  127.29
  -1  -7  -6  798.92  127.49
  -1  -7  -6  911.21  127.29
  -1  -7  -6  923.21  130.39
   2   6   6  946.41  130.19
   2   6   6  853.21  130.29
  -2  -6  -6  912.21  130.19
   3   5   6  191.18   29.30
   3   5   6  202.08   29.70
  -3  -5  -6  219.58   29.60
  -3  -5  -6  203.18   32.80
   4   4   6   30.30    5.50
   4   4   6   36.60   10.70
  -4  -4  -6   24.00   10.20
  -4  -4  -6   31.20    5.60
   5   3   6  146.19   20.20
   5   3   6  126.99   22.30
  -5  -3  -6  134.69   20.20
   6   2   6   89.89   17.30
  -6  -2  -6   96.39   17.70
  -6  -2  -6  104.09   14.70
   7   1   6   21.50    4.40
   7   1   6   42.80   10.30
  -7  -1  -6   34.10    4.90
  -7  -1  -6   29.90    5.10
  -7  -1  -6   44.00    9.40
   8   0   6  358.36   50.29
   8   0   6  343.87   50.49
  -8   0  -6  318.47   50.49
  -8   0  -6  388.56   52.59
   9  -1   6  298.17   41.60
  -9   1  -6  274.17   41.90
  -9   1  -6  292.47   44.60
  10  -2   6   58.09    9.90
  10  -2   6   58.69    9.20
 -10   2  -6   71.59   10.20
 -10   2  -6   74.29   17.20
  11  -3   6    4.60   20.60
  11  -3   6   -2.20    3.30
  11  -3   6    7.40    2.00
 -11   3  -6   -1.60    4.20
 -11   3  -6    8.20   14.40
  12  -4   6   56.19   10.90
 -12   4  -6   55.59   10.90
 -12   4  -6   70.69   11.00
 -12   4  -6  103.59   23.40
  13  -5   6  193.18   31.80
 -13   5  -6  228.98   32.10
 -13   5  -6  226.78   41.60
 -13   5  -6  229.88   31.00
 -13   5  -6  180.78   31.90
  14  -6   6  263.57   38.00
  14  -6   6  233.48   36.30
 -14   6  -6  246.48   36.40
 -14   6  -6  302.17   54.39
 -14   6  -6  261.97   37.70
  15  -7   6  185.58   28.50
 -15   7  -6  212.88   28.00
 -15   7  -6  154.78   25.80
  16  -8   6   92.29   16.50
 -16   8  -6   76.39   14.00
 -16   8  -6   49.60   10.30
 -16   8  -6   64.39   43.80
  17  -9   6   17.20    6.80
  17  -9   6   32.60   16.10
 -17   9  -6   12.80    6.30
  18 -10   6   41.20   23.10
  19 -11   6   38.10   27.60
  20 -12   6   63.79   32.70
   7 -16  -7   -5.70   44.30
   7 -16  -7   -8.30   20.60
  -6  15   7    2.60    8.00
  -6  15   7   24.40   74.89
   6 -15  -7    4.90   17.70
   6 -15  -7    3.30   20.40
  -5  14   7   -1.90    7.20
  -5  14   7   69.79   59.49
   5 -14  -7    3.90   14.30
   5 -14  -7   16.10    7.80
   5 -14  -7    3.30   17.70
  -4  13   7   12.70   44.80
   4 -13  -7   33.00    6.10
   4 -13  -7   21.70   14.80
   4 -13  -7   31.30   13.40
  -3  12   7  142.29   41.30
  -3  12   7  121.39   23.50
   3 -12  -7  145.99   24.70
   3 -12  -7  137.09   23.30
  -2  11   7  360.86   64.29
  -2  11   7  272.37   42.80
   2 -11  -7  304.77   42.40
  -1  10   7  485.65   66.19
  -1  10   7  468.05   66.89
   1 -10  -7  424.26   66.29
   0   9   7  179.98   32.60
   0   9   7  149.79   25.50
   0   9   7  156.48   24.50
   0  -9  -7  187.98   24.90
   0  -9  -7  224.48   36.50
   1   8   7   22.60   15.30
   1   8   7   15.00    2.80
   1   8   7   21.50    5.20
  -1  -8  -7    6.60    5.50
  -1  -8  -7   15.50    3.60
  -1  -8  -7   22.10   17.80
   2   7   7   31.10    5.40
   2   7   7   17.90    3.00
   2   7   7   13.80   14.30
  -2  -7  -7   31.70   16.10
  -2  -7  -7   12.60    4.70
  -2  -7  -7   16.90    3.80
   3   6   7   64.79    8.30
   3   6   7   55.89    8.70
   3   6   7   59.89   15.60
  -3  -6  -7   58.29   15.60
  -3  -6  -7   48.00    9.50
  -3  -6  -7   44.80    8.80
   4   5   7  122.19   16.70
   4   5   7  108.19   16.10
   4   5   7   92.79   20.70
  -4  -5  -7  113.99   21.50
   5   4   7    8.40    9.00
   5   4   7    4.10    2.30
   5   4   7   -0.10    2.60
  -5  -4  -7   -4.90    2.70
  -5  -4  -7   -2.50    2.30
  -5  -4  -7   -5.50    8.50
   6   3   7  120.89   26.20
  -6  -3  -7  163.98   23.00
  -6  -3  -7  173.88   26.30
   7   2   7  226.98   33.50
   7   2   7  220.48   31.00
  -7  -2  -7  214.28   31.00
  -7  -2  -7  196.98   30.90
   8   1   7   27.10    5.30
   8   1   7   36.50    5.90
   8   1   7    9.30   11.40
   8   1   7   50.79   16.50
  -8  -1  -7   36.00    5.90
  -8  -1  -7   40.30    5.80
   9   0   7   -1.50    2.60
   9   0   7   -1.60    1.50
   9   0   7   -1.20   12.40
  -9   0  -7   19.00   10.90
  -9   0  -7    1.80    3.00
  -9   0  -7   -2.90    2.50
  10  -1   7   66.09    9.90
  10  -1   7   59.89   10.50
  10  -1   7   64.39   18.00
 -10   1  -7   73.09   10.80
 -10   1  -7   76.19   17.00
  11  -2   7  261.17   36.20
 -11   2  -7  230.68   38.70
 -11   2  -7  259.77   35.90
 -11   2  -7  231.38   36.30
 -12   3  -7  274.27   41.30
 -12   3  -7  313.87   48.10
 -12   3  -7  289.17   42.00
  13  -4   7  464.05   60.79
  13  -4   7  419.36   61.39
 -13   4  -7  390.06   61.29
 -13   4  -7  379.96   67.59
 -13   4  -7  430.26   60.89
 -13   4  -7  407.06   61.39
 -14   5  -7  225.68   34.60
 -14   5  -7  222.88   35.50
 -14   5  -7  270.07   35.90
  15  -6   7   59.39   41.90
  15  -6   7   18.40   15.10
 -15   6  -7   63.09   11.30
 -15   6  -7   -1.40   33.90
 -15   6  -7   46.10    8.30
  16  -7   7   -0.30    3.70
  16  -7   7    0.00   10.80
  16  -7   7   -1.70   53.49
 -16   7  -7  -12.60   39.00
 -16   7  -7    8.10   10.30
 -16   7  -7   78.79   77.39
 -16   7  -7   -3.40    4.10
  17  -8   7   -4.80   13.70
  17  -8   7   -9.30    4.80
 -17   8  -7   -2.20    5.20
 -17   8  -7   -5.00   11.60
  18  -9   7  -11.00   17.00
  18  -9   7   -6.00    6.10
 -18   9  -7    5.70    6.70
  19 -10   7   30.30   21.50
 -19  10  -7   10.40    8.60
 -20  11  -7    8.60    9.70
  21 -12   7   35.00   32.50
   6 -16  -8   31.20   22.10
   6 -16  -8   -9.10   31.60
  -5  15   8   78.79   70.99
  -5  15   8   42.30   11.30
   5 -15  -8   40.60   22.70
  -4  14   8   77.19   12.70
  -4  14   8   95.29   55.89
   4 -14  -8   52.59   17.90
   4 -14  -8   50.49   18.90
  -3  13   8   67.39   43.60
   3 -13  -8   50.69   16.00
  -2  12   8    5.50    5.30
  -2  12   8   46.40   34.20
  -2  12   8   11.00    9.40
   2 -12  -8   -9.70   10.70
   2 -12  -8   -8.10   11.70
   2 -12  -8   12.00    5.50
  -1  11   8   37.10    9.80
  -1  11   8   23.90   61.79
  -1  11   8   33.30    7.20
   1 -11  -8   61.49   13.20
   1 -11  -8   43.40   10.90
   0  10   8   60.29   24.00
   0  10   8   46.40    8.30
   0 -10  -8   54.69   11.20
   0 -10  -8   61.39    9.00
   1   9   8  223.98   32.80
   1   9   8  205.48   41.20
  -1  -9  -8  299.67   44.70
  -1  -9  -8  220.18   34.00
   2   8   8   77.59   21.30
   2   8   8   74.99   10.50
  -2  -8  -8   64.29   11.20
  -2  -8  -8   76.39   22.60
   3   7   8    8.80    2.90
   3   7   8   38.30   14.30
   3   7   8    5.10    4.10
  -3  -7  -8    3.20    3.10
  -3  -7  -8   12.70   14.90
  -3  -7  -8    0.20    4.10
   4   6   8   19.10    3.20
   4   6   8   16.80    4.70
   4   6   8   13.50   13.10
  -4  -6  -8   23.80    4.20
  -4  -6  -8   15.60   14.30
  -4  -6  -8   18.50    5.00
   5   5   8   15.70    4.90
   5   5   8   33.20   11.80
  -5  -5  -8   26.80    4.90
  -5  -5  -8   34.40   12.50
   6   4   8   67.69    9.80
   6   4   8   65.89   13.90
  -6  -4  -8   54.69    9.60
   7   3   8   15.60    4.20
   7   3   8    9.00   10.00
  -7  -3  -8   15.60    4.10
  -7  -3  -8   23.60    4.20
  -7  -3  -8   24.60   11.90
   8   2   8  283.27   42.30
  -8  -2  -8  260.87   39.60
  -8  -2  -8  286.67   42.70
   9   1   8  545.75   73.39
   9   1   8  489.05   73.49
  -9  -1  -8  490.45   73.59
  10   0   8 1250.47  172.18
  10   0   8 1212.28  172.38
 -10   0  -8 1126.49  172.28
  11  -1   8  403.06   53.39
  11  -1   8  393.06   53.09
  11  -1   8  394.46   59.39
 -11   1  -8  333.27   53.49
 -11   1  -8  332.97   53.09
  12  -2   8   -8.70   24.60
  12  -2   8   39.00    7.20
 -12   2  -8   43.10    8.10
 -12   2  -8   44.90   18.40
  13  -3   8   11.70    2.80
  13  -3   8    8.90    4.80
  13  -3   8  -37.30   26.20
 -13   3  -8   12.90    5.80
 -13   3  -8    3.70   30.10
 -13   3  -8   20.60   19.00
 -13   3  -8   10.80    3.00
  14  -4   8    7.00    6.00
  14  -4   8    8.00    2.70
  14  -4   8   10.10   33.10
 -14   4  -8    6.20    3.30
 -14   4  -8   10.70    7.80
 -14   4  -8   -7.20   20.40
 -14   4  -8    1.90    6.30
  15  -5   8   -9.80    7.50
  15  -5   8    0.80    2.70
  15  -5   8   23.90   37.10
 -15   5  -8  -27.50   25.70
 -15   5  -8    2.10    3.40
 -15   5  -8   -4.30    9.00
 -15   5  -8   -9.50    7.00
  16  -6   8   20.00   41.20
  16  -6   8    7.90    3.60
 -16   6  -8    3.20   32.20
 -16   6  -8   10.20    8.80
 -16   6  -8  -20.60   41.70
 -16   6  -8    2.90    4.10
  17  -7   8   25.40    6.50
  17  -7   8  -30.20   79.29
  17  -7   8   21.20   12.90
 -17   7  -8   33.10   13.10
 -17   7  -8   42.50    7.20
 -17   7  -8    6.40   42.30
  18  -8   8   21.70    6.00
  18  -8   8   33.00   16.10
 -18   8  -8   12.50    6.70
  19  -9   8   77.49   24.80
  20 -10   8   12.50   23.90
 -20  10  -8    8.00    9.60
  21 -11   8   18.10   28.30
 -21  11  -8   -2.70   13.40
   5 -16  -9  -14.50   38.60
   5 -16  -9   -5.60   19.80
  -4  15   9   20.00   10.50
  -4  15   9   33.40   67.59
   4 -15  -9   -2.40   21.60
   4 -15  -9    8.90   17.70
  -3  14   9   67.59   12.00
  -3  14   9   88.69   54.79
   3 -14  -9   66.09   18.60
   3 -14  -9   19.60   19.20
  -2  13   9   34.30    8.60
  -2  13   9   47.10   43.80
   2 -13  -9   62.19   15.60
  -1  12   9  104.89   16.50
  -1  12   9   94.79   18.00
  -1  12   9   56.79   37.20
   1 -12  -9  100.59   19.80
   1 -12  -9   71.09   18.40
   1 -12  -9  110.39   15.80
   0  11   9   39.20    9.30
   0  11   9   58.49   28.00
   0  11   9   23.20    4.50
   0 -11  -9   17.20    5.80
   0 -11  -9   35.90   11.60
   1  10   9    6.70    6.90
   1  10   9   26.20   33.90
   1  10   9   14.40    4.20
   1  10   9   -5.60   21.90
   1  10   9    4.50    2.40
  -1 -10  -9    0.50    7.10
  -1 -10  -9    7.40    4.50
  -1 -10  -9   12.70   26.00
   2   9   9   -2.10    1.80
   2   9   9    2.70   17.30
   2   9   9   -0.60    5.40
   2   9   9   -7.30    3.40
  -2  -9  -9   -0.70    6.00
  -2  -9  -9  -10.10   21.30
  -2  -9  -9    2.70    4.10
   3   8   9   -1.90    4.60
   3   8   9   14.90   17.40
   3   8   9   -3.60    3.10
   3   8   9    2.00    1.50
  -3  -8  -9   -1.30    4.60
  -3  -8  -9   -2.60    3.60
  -3  -8  -9   -8.60   18.70
   4   7   9  153.68   21.10
   4   7   9  135.49   27.70
  -4  -7  -9  133.19   21.50
  -4  -7  -9  169.38   29.70
   5   6   9  682.23   96.69
   5   6   9  669.13   93.69
  -5  -6  -9  588.04   94.09
  -5  -6  -9  728.83   97.49
  -5  -6  -9  623.24   93.89
   6   5   9 1186.48  161.88
   6   5   9 1192.08  163.68
   6   5   9 1006.90  161.78
   7   4   9  719.43  100.99
  -7  -4  -9  689.33   98.89
  -7  -4  -9  655.23   98.79
   8   3   9  605.44   91.69
  -8  -3  -9  632.34   89.69
   9   2   9   40.30   28.00
   9   2   9   87.39   18.10
  -9  -2  -9  122.59   20.30
  -9  -2  -9   82.59   12.80
  10   1   9   73.19   17.60
  10   1   9   73.49   10.00
  10   1   9   55.49    9.30
 -10  -1  -9   98.79   17.60
 -10  -1  -9   47.20   10.10
 -10  -1  -9   61.09    9.70
  11   0   9    2.10    2.20
  11   0   9   -3.10   14.40
  11   0   9    3.30    3.70
  11   0   9  -28.90   25.50
 -11   0  -9    2.30    3.10
 -11   0  -9   -2.10   11.90
 -11   0  -9    0.90    3.90
  12  -1   9    1.00   21.60
  12  -1   9   -0.20    3.90
  12  -1   9   23.80   20.80
 -12   1  -9   -7.80   15.20
 -12   1  -9    2.10    4.60
  13  -2   9   -1.10    4.30
  13  -2   9    1.10    2.10
  13  -2   9   -0.70   26.80
 -13   2  -9   -5.50    4.90
 -13   2  -9   -1.60   18.30
 -13   2  -9    1.70    2.60
  14  -3   9   20.00    7.50
  14  -3   9   37.10    6.30
  14  -3   9   31.60   28.80
 -14   3  -9   49.90    6.60
 -14   3  -9   19.90   22.60
 -14   3  -9   29.80    8.60
 -15   4  -9   76.19   12.70
 -15   4  -9   84.49   15.10
 -15   4  -9   91.09   15.10
  16  -5   9    5.20   44.90
  16  -5   9   98.59   17.70
 -16   5  -9  119.59   18.20
 -16   5  -9   95.89   18.50
  17  -6   9   92.69   15.70
  17  -6   9   65.89   11.20
  17  -6   9    9.70   51.79
 -17   6  -9   65.69   36.10
  18  -7   9    2.20    4.70
  18  -7   9    4.10   14.60
 -18   7  -9    4.20    6.20
 -18   7  -9   -2.10   12.50
  19  -8   9   40.50   19.60
  20  -9   9   37.50   20.80
 -20   9  -9   22.30   10.00
  21 -10   9   93.99   34.90
  22 -11   9   58.79   34.10
   5 -17 -10    3.70   26.70
   4 -16 -10   47.20   25.00
  -3  15  10   27.20   10.70
  -3  15  10   79.39   69.19
   3 -15 -10   50.59   19.10
   3 -15 -10    8.30   21.20
  -2  14  10   24.10   52.29
  -2  14  10   22.80    8.70
   2 -14 -10  -11.50   16.20
   2 -14 -10   30.20   10.30
   2 -14 -10   31.10   16.60
  -1  13  10    4.10    6.70
  -1  13  10    9.20   41.60
   1 -13 -10   -9.00   12.70
   1 -13 -10   12.90   13.70
   1 -13 -10   14.30    7.60
   0  12  10   -0.90    3.30
   0  12  10    2.10    5.40
   0  12  10  -64.99   32.40
   0  12  10    0.10   10.20
   0 -12 -10  -18.70   11.00
   0 -12 -10    7.60    6.50
   0 -12 -10    4.00   12.20
   1  11  10   -0.30    4.80
   1  11  10    4.10    8.10
   1  11  10    3.70    3.10
   1  11  10   17.40   28.20
  -1 -11 -10    6.70   34.60
  -1 -11 -10    2.10    5.50
  -1 -11 -10    8.90   10.20
   2  10  10   99.29   30.20
   2  10  10  104.99   18.30
   2  10  10  119.09   16.00
   2  10  10   90.09   16.70
  -2 -10 -10  138.59   34.90
  -2 -10 -10  119.89   18.80
   3   9  10  275.27   43.40
   3   9  10  225.88   33.00
  -3  -9 -10  193.88   44.20
  -3  -9 -10  226.78   34.20
   4   8  10  703.13  102.19
   4   8  10  745.03  102.69
  -4  -8 -10  661.03  102.39
  -4  -8 -10  772.62  102.69
  -4  -8 -10  645.34  107.49
   5   7  10  650.93   92.69
   5   7  10  619.14   92.49
   5   7  10  569.44   95.99
  -5  -7 -10  714.23   92.99
  -5  -7 -10  635.14   97.09
   6   6  10  444.56   73.79
  -6  -6 -10  537.65   74.89
  -7  -5 -10  102.99   21.20
  -7  -5 -10   78.39   12.70
  -7  -5 -10   81.29   13.00
   8   4  10   -9.80    3.20
   8   4  10    0.90   12.10
   8   4  10    1.90    3.80
  -8  -4 -10    3.50    3.50
  -8  -4 -10   -4.00   12.80
  -8  -4 -10   -1.50    3.60
   9   3  10   66.09   15.40
   9   3  10   46.70    7.20
   9   3  10   26.60    7.00
  -9  -3 -10   38.70    7.10
  -9  -3 -10   19.70   15.50
  10   2  10   12.40   12.80
  10   2  10   34.90   25.30
 -10  -2 -10   11.80    3.80
 -10  -2 -10    3.40    3.60
 -10  -2 -10   16.80   14.20
  11   1  10    0.90   15.70
  11   1  10  -16.90   22.40
  11   1  10    4.40    3.80
 -11  -1 -10    4.10    4.20
 -11  -1 -10    5.00    3.60
 -11  -1 -10    5.70   14.20
 -12   0 -10   94.09   15.10
 -12   0 -10  120.29   23.30
  13  -1  10  238.78   36.10
  13  -1  10  260.67   36.60
 -13   1 -10  270.97   43.90
 -13   1 -10  241.98   36.80
  14  -2  10   97.39   14.60
  14  -2  10   24.70   34.90
  14  -2  10   95.79   15.70
 -14   2 -10  113.39   26.20
 -14   2 -10  104.29   16.50
  15  -3  10    3.60   35.50
  15  -3  10   32.20    7.80
 -15   3 -10   51.59   25.00
 -15   3 -10   40.20    9.30
 -15   3 -10   26.20    5.70
  16  -4  10   12.80    7.00
  16  -4  10   -8.70   45.30
 -16   4 -10   -0.40    8.50
 -16   4 -10    6.50    4.00
 -16   4 -10  -20.20   27.10
 -16   4 -10   11.70   11.20
  17  -5  10  -33.70   51.19
 -17   5 -10   83.09   13.70
 -17   5 -10   87.19   16.10
 -17   5 -10   98.79   37.20
  18  -6  10   79.59   15.40
 -18   6 -10   -3.70   41.80
 -18   6 -10   27.40   14.60
 -18   6 -10   60.59   10.40
  19  -7  10   72.39   20.00
  19  -7  10   98.99   13.90
 -19   7 -10   66.69   14.70
  20  -8  10   56.19   19.40
 -20   8 -10   36.30   11.00
  21  -9  10    5.50   22.50
 -21   9 -10   14.90   10.80
  22 -10  10   37.00   30.40
   4 -17 -11   29.30   26.00
  -2  15  11   16.90   69.89
   2 -15 -11   16.90   19.80
   2 -15 -11  -34.50   20.60
  -1  14  11   -5.80    8.60
  -1  14  11   70.19   55.79
   1 -14 -11    9.70   16.10
   1 -14 -11   18.20   17.20
   0  13  11    2.40    6.90
   0  13  11  -24.80   41.60
   0 -13 -11   15.60    7.50
   0 -13 -11  -28.10   14.20
   0 -13 -11   11.80   14.60
   1  12  11  111.09   20.40
   1  12  11   99.19   40.10
   1  12  11  115.79   16.30
  -1 -12 -11   91.69   21.20
  -1 -12 -11  103.79   17.50
   2  11  11  134.09   37.10
   2  11  11   69.19   72.69
   2  11  11  135.49   21.00
  -2 -11 -11  134.89   25.20
  -2 -11 -11  203.28   45.80
   3  10  11  241.98   39.10
   3  10  11  280.17   38.60
   3  10  11  217.78   48.50
   3  10  11  251.17   37.90
  -3 -10 -11  281.97   39.90
  -3 -10 -11  331.87   57.19
   4   9  11  192.28   26.10
   4   9  11  179.28   25.30
   4   9  11  150.58   24.70
   4   9  11  120.39   34.50
  -4  -9 -11  180.18   26.60
  -4  -9 -11  278.87   55.39
   5   8  11    2.60    1.80
   5   8  11   12.90    4.10
   5   8  11   -4.30    4.80
   5   8  11   16.90   17.50
  -5  -8 -11   -2.20   22.10
  -5  -8 -11    5.00    5.70
  -5  -8 -11    0.80    4.30
   6   7  11   98.99   13.40
   6   7  11   82.49   22.40
  -6  -7 -11   71.79   14.30
  -6  -7 -11   94.39   15.00
  -6  -7 -11  136.69   27.50
   7   6  11  103.99   16.90
   7   6  11  110.49   17.20
   7   6  11  146.49   25.90
  -7  -6 -11  114.09   17.30
   8   5  11   77.99   17.90
   8   5  11   46.60    9.80
  -8  -5 -11  105.39   21.60
  -8  -5 -11   57.19   10.10
   9   4  11   29.50   14.70
  -9  -4 -11   17.10    5.00
  -9  -4 -11   18.00    5.00
  -9  -4 -11   32.60   17.40
  10   3  11   -0.80   14.20
 -10  -3 -11   14.70   16.80
 -10  -3 -11    3.20    4.30
  12   1  11   21.30    5.20
  12   1  11   13.30    3.60
  12   1  11   13.10   20.80
  12   1  11   36.90   24.30
 -12  -1 -11   13.30    4.90
 -12  -1 -11   35.70   16.90
  13   0  11    0.90    2.80
  13   0  11   12.90   23.80
  13   0  11    0.80    4.80
  13   0  11  -47.90   30.60
 -13   0 -11   -8.90   18.50
 -13   0 -11    3.60    4.10
 -13   0 -11    6.90    5.50
  14  -1  11   38.30   28.50
  14  -1  11   45.80    7.50
 -14   1 -11   30.50   22.40
 -14   1 -11   35.10    9.10
 -14   1 -11   47.80    8.60
  15  -2  11   90.29   15.50
 -15   2 -11   91.19   16.10
 -16   3 -11  254.67   35.00
 -16   3 -11  206.98   36.50
  17  -4  11  214.98   31.30
 -17   4 -11  177.38   46.40
 -17   4 -11  219.88   33.50
  18  -5  11   60.59   10.60
  18  -5  11   81.99   15.40
  18  -5  11   13.10   61.49
 -18   5 -11  100.69   41.00
 -18   5 -11   54.99   15.10
 -18   5 -11   66.59   11.50
  19  -6  11    9.20    5.60
  19  -6  11   24.70   14.40
 -19   6 -11    5.50   15.00
 -19   6 -11   19.20    7.40
  20  -7  11  -16.00   16.70
 -20   7 -11    7.10    9.20
  21  -8  11  -21.90   20.10
 -21   8 -11   -0.50   11.40
  22  -9  11    8.80   25.20
 -22   9 -11   -5.00   13.00
   3 -17 -12   -2.30   26.50
   2 -16 -12   66.29   25.60
  -1  15  12   -2.00   70.79
   1 -15 -12   37.60   21.80
   1 -15 -12   13.70   20.40
   0  14  12  100.79   60.99
   0  14  12  121.69   19.70
   0 -14 -12   84.29   26.10
   1  13  12   48.40   43.10
   1  13  12   48.90   10.10
  -1 -13 -12    5.90   15.70
  -1 -13 -12   70.69   17.70
   2  12  12   11.20    7.00
   2  12  12    7.30   35.20
   2  12  12    7.80    3.60
   2  12  12    8.60   10.30
  -2 -12 -12   -9.40   14.10
  -2 -12 -12    0.40   47.80
  -2 -12 -12   11.40   12.90
  -2 -12 -12   22.70    7.60
   3  11  12   50.89    7.50
   3  11  12   34.10   11.00
   3  11  12   66.49   32.30
  -3 -11 -12   33.10    9.00
  -3 -11 -12   48.00   12.90
  -3 -11 -12  119.99   41.70
   4  10  12  126.49   18.60
   4  10  12   93.49   15.00
   4  10  12  180.38   37.70
  -4 -10 -12  125.29   18.40
  -4 -10 -12  148.09   39.60
  -4 -10 -12   81.79   16.30
   5   9  12  133.99   20.90
   5   9  12  200.28   33.60
   5   9  12  155.98   21.70
  -5  -9 -12  127.89   22.70
  -5  -9 -12  173.08   39.00
   6   8  12  117.09   19.60
   6   8  12  135.19   18.10
  -6  -8 -12  103.09   19.00
  -6  -8 -12  176.88   33.00
   7   7  12   46.80    6.60
   7   7  12   29.90    8.50
  -7  -7 -12   54.89   23.80
  -7  -7 -12   42.80    8.90
  -7  -7 -12   38.10    8.10
   8   6  12   13.30    5.20
   8   6  12   19.40    4.80
   8   6  12   29.90   16.40
  -8  -6 -12   -4.40    5.50
  -8  -6 -12   -6.30    5.00
  -8  -6 -12  -15.50   20.30
   9   5  12   -7.40   15.10
   9   5  12    2.20    4.90
  -9  -5 -12    2.00    4.30
  -9  -5 -12   -9.30   17.80
  -9  -5 -12  -10.40    4.50
  10   4  12    2.20    4.50
  10   4  12    3.00    5.10
  10   4  12    3.40   15.20
 -10  -4 -12    6.70   17.00
 -10  -4 -12    1.10    4.10
 -10  -4 -12    8.90    5.00
  12   2  12  236.78   41.10
  12   2  12  194.08   39.50
  12   2  12  216.68   31.80
 -12  -2 -12  227.38   32.30
  13   1  12  678.43   97.09
 -13  -1 -12  635.04   91.09
 -13  -1 -12  577.14   95.69
  14   0  12  406.76   58.59
 -14   0 -12  402.66   58.89
  15  -1  12  216.28   32.10
 -15   1 -12  222.28   33.20
 -15   1 -12  228.78   44.90
  16  -2  12  170.18   24.40
 -16   2 -12  130.39   27.00
 -16   2 -12  244.28   39.30
 -16   2 -12  163.18   25.80
  17  -3  12   12.20    8.50
  17  -3  12    2.90   43.40
  17  -3  12   21.00    4.80
 -17   3 -12    8.80    5.20
 -17   3 -12   -2.10   29.80
 -17   3 -12   28.70   10.30
  18  -4  12   -6.30    9.80
  18  -4  12   12.80   56.19
 -18   4 -12   -2.00    5.60
 -18   4 -12    4.50   35.90
 -18   4 -12    5.70   10.10
  19  -5  12    4.70   12.30
  19  -5  12   -9.20    4.90
 -19   5 -12   -4.00   13.80
 -19   5 -12    4.30    6.60
  20  -6  12   -7.50   16.40
 -20   6 -12    5.00    7.70
  21  -7  12   11.70   18.90
 -21   7 -12   34.50   11.40
  22  -8  12   32.30   24.70
 -22   8 -12    2.20   13.00
  23  -9  12   73.99   31.00
   3 -18 -13  -38.90   32.10
   2 -17 -13    4.40   27.80
   1 -16 -13    1.70   23.10
   0  15  13   27.50   70.69
   0  15  13   18.00   10.60
   0 -15 -13    3.70   21.70
   0 -15 -13   12.40   21.10
   1  14  13  -26.20   68.49
  -1 -14 -13   17.10   19.10
  -1 -14 -13    2.30   16.30
   2  13  13   36.70   46.70
   2  13  13   55.99   10.40
  -2 -13 -13   65.79   13.40
  -2 -13 -13  107.59   20.10
   3  12  13  162.68   46.00
   3  12  13  117.79   19.60
   3  12  13  156.08   21.10
  -3 -12 -13   62.79   50.49
   4  11  13   86.29   15.10
   4  11  13  142.19   34.90
   4  11  13   81.69   12.70
  -4 -11 -13  106.89   44.50
  -4 -11 -13   51.19   15.00
  -4 -11 -13   51.29   13.00
   5  10  13    3.10    5.60
   5  10  13    4.00    3.20
   5  10  13   35.40   28.10
   5  10  13   -4.30    7.60
  -5 -10 -13   10.20    6.50
  -5 -10 -13   80.19   35.80
  -5 -10 -13   20.60   10.00
   6   9  13   20.20   24.60
   6   9  13    3.80    7.60
   6   9  13   -0.90    2.40
   6   9  13    0.90    5.20
  -6  -9 -13   -9.30    7.60
  -6  -9 -13   11.00    6.60
  -6  -9 -13   -4.00   30.60
   7   8  13   21.10   23.10
   7   8  13   44.20    8.40
   7   8  13   28.50    5.50
   7   8  13   37.40    7.30
  -7  -8 -13   34.40    7.70
  -7  -8 -13   34.60    9.10
   8   7  13   19.10    6.70
   8   7  13   28.10    6.20
   8   7  13   12.20   19.30
  -8  -7 -13    9.80   24.50
  -8  -7 -13   32.50    7.20
  -8  -7 -13   15.90    7.40
   9   6  13   80.09   21.50
   9   6  13   62.69   11.10
  -9  -6 -13   40.10   25.00
  -9  -6 -13   57.19   11.10
  10   5  13  406.26   61.99
 -10  -5 -13  383.06   56.89
 -10  -5 -13  334.87   64.49
 -10  -5 -13  410.36   56.99
  11   4  13  310.37   53.29
  11   4  13  349.96   58.79
 -11  -4 -13  402.86   53.29
 -11  -4 -13  374.86   53.29
 -11  -4 -13  400.16   60.89
 -12  -3 -13  194.28   29.00
  13   2  13   86.49   14.90
 -13  -2 -13  113.79   16.60
 -13  -2 -13  154.38   29.30
  14   1  13  101.69   14.20
  14   1  13   77.49   12.60
 -14  -1 -13   85.59   14.30
 -14  -1 -13   65.79   13.60
  15   0  13   -5.40    6.10
  15   0  13  -11.70   27.40
  15   0  13    5.50    3.50
 -15   0 -13   -4.10    5.00
 -15   0 -13    1.90    7.20
 -15   0 -13   -9.10   21.50
  16  -1  13   -6.30    3.90
  16  -1  13    8.60   35.40
  16  -1  13  -17.70    6.70
 -16   1 -13  -34.00   25.90
 -16   1 -13   14.70    8.30
 -16   1 -13    1.20    6.50
  17  -2  13   -1.80    7.40
  17  -2  13    2.90    3.80
  17  -2  13   30.30   41.10
 -17   2 -13   12.90   27.70
 -17   2 -13    1.00    7.60
 -17   2 -13  -11.40    9.10
  18  -3  13   -2.80    9.20
  18  -3  13  -31.60   53.79
 -18   3 -13    5.90   10.60
 -18   3 -13  -16.10   31.20
  19  -4  13   17.10   11.90
  19  -4  13   -1.60    4.40
 -19   4 -13   -0.80    6.60
 -19   4 -13    3.40   11.70
 -19   4 -13    9.00   42.20
  20  -5  13   45.90   15.80
 -20   5 -13   36.20    9.70
  21  -6  13   91.29   21.50
 -21   6 -13   52.89   13.70
  22  -7  13   34.90   25.20
 -22   7 -13   10.90   11.90
  23  -8  13   56.19   25.90
   2 -18 -14   30.40   33.00
   1 -17 -14   60.39   32.40
   0 -16 -14   61.29   27.20
   1  15  14   73.99   15.40
  -1 -15 -14   49.50   25.50
   2  14  14   33.80   60.59
   2  14  14   11.30    5.20
   2  14  14    7.60   12.60
  -2 -14 -14    2.70   17.10
  -2 -14 -14    4.00   14.70
   3  13  14   -4.70    8.50
   3  13  14    1.10    4.60
   3  13  14   15.00   46.50
  -3 -13 -14   72.39   63.19
  -3 -13 -14   -7.50   17.20
  -3 -13 -14   15.60    9.20
  -3 -13 -14    7.40   15.60
   4  12  14  -17.20   37.00
   4  12  14   14.70    7.50
   4  12  14    3.50    3.70
  -4 -12 -14   18.80   53.89
  -4 -12 -14   20.30    9.20
  -4 -12 -14  -13.50   13.00
   5  11  14   -4.60   33.90
   5  11  14   -9.10    9.30
   5  11  14   15.40    6.80
   5  11  14    8.50    3.60
  -5 -11 -14    5.80    7.80
  -5 -11 -14   14.20   11.20
  -5 -11 -14   -3.40   43.40
   6  10  14    1.00    8.90
   6  10  14   20.60    3.80
   6  10  14   46.40   32.00
  -6 -10 -14   11.50    8.10
  -6 -10 -14    3.00   36.30
  -6 -10 -14   18.70   10.70
   7   9  14   35.00   27.10
   7   9  14   43.30    7.60
   7   9  14   47.00   10.30
  -7  -9 -14   40.60    9.60
  -7  -9 -14   53.19   11.40
  -7  -9 -14   53.09   36.00
   8   8  14  207.08   47.70
   8   8  14  269.77   38.60
  -8  -8 -14  301.17   52.89
  -8  -8 -14  274.77   40.30
   9   7  14  194.18   27.70
   9   7  14  227.38   40.10
  -9  -7 -14  156.88   27.80
  10   6  14  323.67   60.99
  10   6  14  381.26   54.49
 -10  -6 -14  354.06   65.39
 -10  -6 -14  387.36   54.69
  11   5  14   68.19   23.20
  11   5  14   72.49   13.30
 -11  -5 -14  128.29   30.80
 -11  -5 -14   69.79   13.20
 -11  -5 -14   68.99   12.60
  13   3  14   24.90    6.00
  13   3  14   84.59   41.80
  13   3  14   27.70   22.60
 -13  -3 -14   31.60    7.80
 -13  -3 -14   40.90    7.60
  14   2  14   -9.30   40.00
  14   2  14   38.00    7.10
  14   2  14   36.60   25.70
 -14  -2 -14   90.49   26.10
  15   1  14  101.99   36.00
  15   1  14   86.09   16.50
  15   1  14   93.89   14.70
 -15  -1 -14   98.29   15.90
 -15  -1 -14  101.49   30.40
  16   0  14    2.20    4.30
  16   0  14    7.10   32.80
 -16   0 -14   13.10    8.70
 -16   0 -14   -1.40   27.00
  17  -1  14  -23.30   42.00
  17  -1  14   11.30    7.80
  17  -1  14   11.50    4.80
 -17   1 -14    6.70   30.30
 -17   1 -14    7.60   10.00
 -17   1 -14   18.80    8.40
  18  -2  14    8.80    9.30
  18  -2  14   15.80   50.29
  18  -2  14   22.80    5.40
 -18   2 -14   17.00   12.90
 -18   2 -14   -3.20    9.10
 -18   2 -14   15.40   32.30
  19  -3  14   11.50   12.00
  19  -3  14   29.80   56.39
  19  -3  14    1.60    4.90
 -19   3 -14    5.20   37.00
 -19   3 -14   10.20   10.90
 -19   3 -14   20.20   12.60
  20  -4  14   -0.70   13.50
  21  -5  14   26.60   16.40
 -21   5 -14   22.30   10.40
  22  -6  14   93.89   24.30
 -22   6 -14   65.69   23.10
  23  -7  14  116.39   25.50
 -23   7 -14   54.69   17.20
   1 -18 -15  -22.00   36.70
   0 -17 -15   -3.50   28.80
  -1 -16 -15   13.60   26.50
   2  15  15  -13.40   11.80
  -2 -15 -15    0.00   23.20
   3  14  15  -25.30   58.69
   3  14  15   -2.20    5.10
   3  14  15   25.10   10.60
  -3 -14 -15    8.40   20.20
  -3 -14 -15   -9.30   19.50
   4  13  15  -45.30   49.20
   4  13  15   -3.10    4.70
   4  13  15   16.50    8.70
  -4 -13 -15   30.90   68.79
  -4 -13 -15  -11.30   16.90
  -4 -13 -15  -21.10   17.90
   5  12  15   34.80   43.40
   5  12  15   52.59    8.40
  -5 -12 -15  -18.60   55.89
  -5 -12 -15   44.10   16.60
  -5 -12 -15   41.80   12.70
   6  11  15  109.69   18.00
   6  11  15  151.68   42.50
  -6 -11 -15  131.59   21.60
  -6 -11 -15  151.58   50.49
   7  10  15  124.49   22.70
   7  10  15  147.09   19.70
   7  10  15  112.59   38.20
  -7 -10 -15   78.99   48.40
  -7 -10 -15  129.89   24.40
  -7 -10 -15  118.59   22.10
   8   9  15  122.69   35.70
   8   9  15  109.19   19.00
   8   9  15  119.09   17.00
  -8  -9 -15   92.69   19.20
  -8  -9 -15  144.99   42.90
  -8  -9 -15  119.19   20.00
   9   8  15   14.10    3.40
   9   8  15    7.20    7.50
   9   8  15   15.80    7.20
  -9  -8 -15   11.60    8.30
  -9  -8 -15   11.20    7.80
  -9  -8 -15   33.20   33.70
  10   7  15    5.90    7.60
  10   7  15    8.80    6.40
  10   7  15   16.00   25.20
 -10  -7 -15   14.60    7.90
 -10  -7 -15   18.40   31.10
 -10  -7 -15   13.30    6.80
  11   6  15  187.08   24.40
 -11  -6 -15  159.38   24.70
 -11  -6 -15  124.29   23.80
  12   5  15  140.19   32.20
  12   5  15  147.49   22.30
 -12  -5 -15  117.19   21.80
 -12  -5 -15  153.28   22.00
  13   4  15  119.69   28.90
  13   4  15   51.79    9.80
 -13  -4 -15  108.39   31.00
 -13  -4 -15   65.09   11.30
 -13  -4 -15   48.30   10.90
  14   3  15   66.59   11.60
  14   3  15  131.99   30.90
 -14  -3 -15   75.69   13.10
 -14  -3 -15  133.19   29.30
 -14  -3 -15   56.39   12.40
  15   2  15   13.10    4.80
  15   2  15   21.60   31.40
  15   2  15   32.70    8.10
 -15  -2 -15    9.80    9.00
 -15  -2 -15  -29.90   27.10
 -15  -2 -15   13.80    7.00
  16   1  15  -17.70    7.40
  16   1  15  -10.00   31.20
  16   1  15   -5.20    4.60
 -16  -1 -15    6.00    9.40
 -16  -1 -15    4.70    6.80
 -16  -1 -15    4.90   27.30
  17   0  15   -3.10    7.70
  17   0  15   -0.60    4.40
  17   0  15  -12.80   41.40
 -17   0 -15   -9.10    9.20
 -17   0 -15  -10.10   32.10
 -17   0 -15   -2.90    7.90
  18  -1  15   11.70   50.69
  18  -1  15   11.70    9.70
  18  -1  15    7.80    5.20
 -18   1 -15   20.90    8.50
 -18   1 -15    8.80   12.00
 -18   1 -15   56.09   35.20
  19  -2  15   48.20   11.90
  19  -2  15  -36.00   60.59
  19  -2  15   30.80    7.40
 -19   2 -15   53.29   41.10
 -19   2 -15   21.80   13.70
 -19   2 -15   34.00   11.80
  20  -3  15   85.09   18.70
 -21   4 -15  146.89   26.80
  22  -5  15  105.29   23.80
  23  -6  15   58.59   23.00
  24  -7  15   34.00   26.90
   0 -18 -16   -9.00   35.30
  -1 -17 -16   -2.10   29.00
  -2 -16 -16   -0.90   26.90
   3  15  16   11.90    6.60
  -3 -15 -16    8.80   23.20
   4  14  16  115.99   64.59
   4  14  16   48.70    9.00
   4  14  16   51.19   13.00
  -4 -14 -16   34.70   22.10
  -4 -14 -16   -3.20   21.70
   5  13  16   40.90   11.50
   5  13  16   24.30    6.80
  -5 -13 -16  -52.39   74.09
  -5 -13 -16    7.50   18.00
   6  12  16   17.20   10.00
   6  12  16    6.40    4.50
   6  12  16   21.40   43.70
  -6 -12 -16   26.80   11.70
  -6 -12 -16   -6.60   15.70
  -6 -12 -16    9.50   63.79
   7  11  16    4.30    4.10
   7  11  16   -5.00   40.40
   7  11  16   20.10    8.40
  -7 -11 -16  -10.60   13.80
  -7 -11 -16    4.20   52.39
  -7 -11 -16   34.90   11.00
   8  10  16   20.90    4.90
   8  10  16   15.70   34.00
   8  10  16   13.80   10.80
  -8 -10 -16   23.90   47.20
  -8 -10 -16   17.40   10.70
   9   9  16   42.60    7.20
   9   9  16   53.89   11.60
   9   9  16  110.09   33.20
  -9  -9 -16   38.10   12.50
  -9  -9 -16   28.00   11.10
  -9  -9 -16   86.29   42.00
  10   8  16   90.69   31.40
  10   8  16   52.39   10.00
  10   8  16   30.60   11.00
 -10  -8 -16   55.19   12.00
 -10  -8 -16  108.39   37.10
 -10  -8 -16   27.40   10.40
  11   7  16   47.50   12.00
 -11  -7 -16   65.49   11.60
 -11  -7 -16   90.49   36.10
 -11  -7 -16   35.20   10.20
  12   6  16    5.70    8.40
  12   6  16   17.30    7.80
  12   6  16   -3.00   26.60
 -12  -6 -16   17.40    8.60
 -12  -6 -16   43.40   31.00
  13   5  16   -1.40    8.00
  13   5  16    7.80   24.50
 -13  -5 -16    2.50    8.10
 -13  -5 -16   -6.60   29.60
  14   4  16    0.10   27.80
  14   4  16    0.30    4.30
  14   4  16  -19.70    7.00
 -14  -4 -16   29.20   30.50
 -14  -4 -16    4.20    7.40
 -14  -4 -16    3.70    8.30
  15   3  16    7.90    4.80
  15   3  16   -0.50    6.90
  15   3  16    7.90   31.10
 -15  -3 -16   11.10    7.80
 -15  -3 -16    9.90    8.90
  16   2  16   73.59   38.60
  16   2  16   75.89   12.80
 -16  -2 -16   50.99   12.90
  17   1  16  161.68   40.20
  17   1  16   79.59   13.90
 -17  -1 -16   62.29   17.10
 -17  -1 -16  101.09   15.70
  18   0  16  241.18   35.00
  18   0  16  216.28   57.69
 -18   0 -16  214.88   56.19
 -18   0 -16  204.98   35.20
  19  -1  16   96.09   15.80
  19  -1  16  141.79   21.50
  19  -1  16   -7.50   59.19
 -19   1 -16   66.39   19.60
 -19   1 -16   90.89   44.60
  20  -2  16   45.30   14.60
 -20   2 -16   48.80   13.80
  21  -3  16    8.30   13.80
 -21   3 -16   34.60   15.10
  22  -4  16   26.20   18.50
 -22   4 -16   11.00   16.90
  23  -5  16   25.30   17.80
 -23   5 -16  -19.50   19.00
  24  -6  16   35.50   24.20
  -1 -18 -17    8.90   36.10
  -2 -17 -17   -7.00   30.60
  -3 -16 -17  -10.40   28.40
   4  15  17   24.40    8.30
  -4 -15 -17    5.10   23.90
   5  14  17   27.10   13.00
  -5 -14 -17   12.40   20.20
  -5 -14 -17   21.50   22.20
   6  13  17   52.79    8.70
   6  13  17   64.19   56.79
   6  13  17   40.10   12.80
  -6 -13 -17   12.20   20.00
  -6 -13 -17  -25.60   81.49
   7  12  17   46.00    8.40
   7  12  17   26.00   47.20
  -7 -12 -17   28.80   67.99
  -7 -12 -17   50.09   17.10
   8  11  17   -8.90   40.20
   8  11  17   35.90    6.90
  -8 -11 -17   24.90   14.20
  -8 -11 -17   54.69   12.90
  -8 -11 -17   -2.00   55.79
   9  10  17    4.20   36.60
   9  10  17    2.70    3.90
  -9 -10 -17  -13.30   47.80
  -9 -10 -17   10.20   12.40
  -9 -10 -17   20.90    9.80
  10   9  17   -1.00    3.90
  10   9  17   23.30   35.60
  10   9  17    2.80   10.30
  10   9  17   17.20    8.90
 -10  -9 -17    3.10   45.30
 -10  -9 -17    6.60   10.50
 -10  -9 -17    0.40   10.40
  11   8  17   22.50   33.30
  11   8  17   -3.00    9.60
  11   8  17    1.00    8.10
 -11  -8 -17   35.80   40.40
 -11  -8 -17   -0.30   10.20
 -11  -8 -17    6.80    9.10
  12   7  17   25.10    8.70
  12   7  17   -1.60   29.30
  12   7  17    8.90    9.70
 -12  -7 -17   19.30    9.80
 -12  -7 -17   24.80    9.80
 -12  -7 -17   -9.40   32.60
  13   6  17   18.70   32.40
  13   6  17   32.60   11.20
 -13  -6 -17  104.29   39.00
 -13  -6 -17   34.80   10.20
 -13  -6 -17   29.10    9.90
  14   5  17   65.19   15.50
  14   5  17   84.39   14.10
 -14  -5 -17   91.79   15.80
 -14  -5 -17   98.29   38.60
 -14  -5 -17  114.99   17.70
  15   4  17   80.29   14.60
 -15  -4 -17   85.29   16.30
 -15  -4 -17  146.79   40.40
 -15  -4 -17  102.79   17.00
  16   3  17  122.19   19.10
  16   3  17   85.29   16.10
 -16  -3 -17  118.29   19.30
 -16  -3 -17   96.29   17.50
 -16  -3 -17  129.29   40.30
  17   2  17   61.79   11.70
  17   2  17   61.89   14.50
  17   2  17  100.49   42.60
 -17  -2 -17   80.69   36.80
 -17  -2 -17   89.59   14.20
 -17  -2 -17   55.09   14.90
  18   1  17   24.10    6.80
  18   1  17   11.30   10.90
  18   1  17   12.40   43.70
 -18  -1 -17    4.50   10.10
 -18  -1 -17   12.70   35.70
 -18  -1 -17   27.10   13.10
  19   0  17  -10.20   10.70
  19   0  17   38.60   54.19
 -19   0 -17  -17.90   42.30
 -19   0 -17    1.40   14.80
 -19   0 -17    1.80   11.10
  20  -1  17   52.19   13.60
 -20   1 -17    6.90   13.70
  21  -2  17   59.29   16.30
 -21   2 -17   37.50   17.20
  22  -3  17   27.00   17.40
 -22   3 -17  -12.40   16.40
  23  -4  17   36.30   19.60
 -23   4 -17   -2.00   20.00
  24  -5  17   70.39   24.90
 -24   5 -17   -3.50   22.30
  -3 -17 -18   96.89   36.70
  -4 -16 -18   37.30   29.30
   5  15  18   35.60    9.30
  -5 -15 -18   21.40   26.60
   6  14  18    8.70    6.90
   6  14  18    8.60   19.40
  -6 -14 -18   33.40   23.00
   7  13  18   -0.60    5.80
   7  13  18    1.70   11.50
   7  13  18   46.60   60.59
  -7 -13 -18  -27.80   20.00
  -7 -13 -18    2.40  110.59
   8  12  18   -3.20    5.50
   8  12  18  -14.40   61.29
  -8 -12 -18    6.80   16.80
  -8 -12 -18    7.10   76.29
   9  11  18  -15.90   44.70
   9  11  18    2.80    9.90
   9  11  18    3.50    5.00
  -9 -11 -18   26.40   15.00
  10  10  18   11.00    4.70
  10  10  18    3.00    9.90
  10  10  18  -32.30   42.80
 -10 -10 -18  -15.20   13.30
 -10 -10 -18   69.19   59.29
 -10 -10 -18   27.80   11.70
  11   9  18   20.50    5.40
  11   9  18    1.60   38.40
 -11  -9 -18   28.50   10.80
 -11  -9 -18   19.50   12.20
 -11  -9 -18    8.10   48.20
  12   8  18   58.19   39.50
 -12  -8 -18   60.69   13.00
 -12  -8 -18   54.69   46.90
 -12  -8 -18   47.20   13.50
  13   7  18   52.99   15.60
  13   7  18   94.79   36.30
 -13  -7 -18   90.99   15.80
 -13  -7 -18   44.50   44.40
 -13  -7 -18   72.39   15.20
  14   6  18   72.59   40.90
 -14  -6 -18  103.49   42.40
 -14  -6 -18  114.99   19.20
  15   5  18  -34.30   35.40
  15   5  18   38.10   11.40
  15   5  18   33.80    8.40
 -15  -5 -18   62.59   12.00
 -15  -5 -18   42.00   12.50
 -15  -5 -18  -14.40   40.40
  16   4  18   12.70    6.60
  16   4  18   26.50   39.30
  16   4  18   35.30   11.20
 -16  -4 -18   23.70   11.30
 -16  -4 -18   -7.40   39.60
 -16  -4 -18   11.20   10.50
  17   3  18   21.60   42.70
  17   3  18    1.90    9.40
  17   3  18    2.30    6.00
 -17  -3 -18    5.40    9.00
 -17  -3 -18    6.80   11.80
 -17  -3 -18    3.20   38.70
  18   2  18   33.70   11.90
  18   2  18   23.50   44.40
 -18  -2 -18   -4.70   39.40
 -18  -2 -18   27.60   11.10
 -18  -2 -18   20.10   13.60
  19   1  18   61.59   50.89
  19   1  18   42.90   13.10
 -19  -1 -18   26.70   43.60
 -19  -1 -18   24.10   12.30
  20   0  18   36.50   13.20
 -20   0 -18   10.90   14.00
  21  -1  18   -4.50   13.40
 -21   1 -18   11.00   14.70
  22  -2  18   24.80   20.40
 -22   2 -18  -10.90   17.90
  23  -3  18   14.70   17.70
 -23   3 -18   13.80   19.90
  24  -4  18   42.40   21.60
 -24   4 -18   -2.30   22.60
  -3 -18 -19   17.40   40.20
  -4 -17 -19   38.10   37.80
  -5 -16 -19    8.50   30.80
  -6 -15 -19   57.79   29.70
   7  14  19   -4.40    7.70
  -7 -14 -19   -4.70   24.30
   8  13  19  -12.50   13.90
  -8 -13 -19  -59.19   22.70
   9  12  19  -29.80   59.59
   9  12  19   31.60   12.50
   9  12  19    0.90    5.70
  -9 -12 -19   56.69   86.19
  -9 -12 -19   -6.80   19.70
  10  11  19   41.60    8.50
 -10 -11 -19   47.60   18.40
 -10 -11 -19   93.39   75.69
  11  10  19   71.39   11.80
  11  10  19   97.19   53.49
 -11 -10 -19   74.29   18.90
 -11 -10 -19   34.30   70.79
  12   9  19   -1.10   42.80
  12   9  19   20.70    6.30
  12   9  19   42.50   11.90
 -12  -9 -19   41.50   12.30
 -12  -9 -19  -32.90   53.59
 -12  -9 -19   38.00   14.50
  13   8  19    2.30   10.70
  13   8  19   26.50   41.70
 -13  -8 -19    7.00   12.50
 -13  -8 -19   34.60   11.80
 -13  -8 -19  -22.50   48.90
  14   7  19   -3.40   10.00
  14   7  19   13.00   40.50
 -14  -7 -19    8.00   11.00
 -14  -7 -19    7.40   47.50
 -14  -7 -19    7.00   10.60
  15   6  19   29.50   11.80
  15   6  19   29.90   41.30
 -15  -6 -19   22.00   11.10
 -15  -6 -19   25.80   12.30
 -15  -6 -19   40.00   47.30
  16   5  19   70.09   45.30
  16   5  19   64.79   12.20
 -16  -5 -19   12.50   14.10
 -16  -5 -19   21.20   46.90
 -16  -5 -19   36.70   11.80
  17   4  19   39.50   45.10
  17   4  19   52.39   12.80
 -17  -4 -19   33.00   15.20
 -17  -4 -19   42.70   12.80
 -17  -4 -19   30.10   40.60
  18   3  19  -45.70   47.10
 -18  -3 -19   22.20   11.90
 -18  -3 -19  -12.60   45.50
  19   2  19   26.80   12.40
 -19  -2 -19   17.90   47.70
 -19  -2 -19   15.80   12.20
  20   1  19   20.10   13.80
 -20  -1 -19   10.40   13.20
  21   0  19   12.30   14.40
 -21   0 -19   -8.40   13.60
  22  -1  19   19.50   18.00
 -22   1 -19    2.10   15.90
  23  -2  19   34.30   18.50
 -23   2 -19    6.60   19.40
  24  -3  19   73.69   21.90
 -24   3 -19   15.50   23.20
  -6 -16 -20  -18.10   29.10
  -7 -15 -20   12.00   25.80
   8  14  20   24.30    8.80
  -8 -14 -20    1.10   23.40
   9  13  20   12.50    7.90
  10  12  20    7.80    6.70
  10  12  20    8.90   13.70
 -10 -12 -20  -19.00   20.40
  11  11  20   22.80   12.90
  11  11  20   10.40    5.80
  11  11  20   25.50   70.59
 -11 -11 -20   11.80   17.70
 -11 -11 -20   94.89   79.89
  12  10  20   -3.30   62.29
  12  10  20   47.30    8.40
 -12 -10 -20   67.09   70.59
 -12 -10 -20   18.90   16.80
  13   9  20   39.90   50.29
  13   9  20   66.19   10.50
 -13  -9 -20   44.90   16.90
  14   8  20    4.40   49.40
 -14  -8 -20   60.29   15.90
 -14  -8 -20   28.00   60.39
  15   7  20   73.59   15.60
  15   7  20   51.89   50.89
 -15  -7 -20   48.50   16.30
 -15  -7 -20   38.80   57.49
  16   6  20  -29.40   51.19
  16   6  20   17.60   11.10
 -16  -6 -20    9.90   11.90
 -16  -6 -20   -4.70   54.29
  17   5  20  -10.30   11.10
  17   5  20   44.50   51.59
 -17  -5 -20   13.20   51.19
 -17  -5 -20   13.70   11.80
  18   4  20   21.70   12.90
 -18  -4 -20  -66.89   51.59
 -18  -4 -20   -4.40   12.70
  19   3  20   15.60   12.20
 -19  -3 -20    5.30   12.70
  20   2  20   34.40   14.70
 -20  -2 -20   36.20   14.50
 -21  -1 -20   54.79   18.20
  22   0  20  104.89   22.90
 -22   0 -20   60.49   36.90
  23  -1  20   61.59   21.10
 -23   1 -20   41.30   22.70
 -24   2 -20   24.60   23.30
  -6 -17 -21  -16.40   37.30
  -7 -16 -21    1.00   32.80
  -8 -15 -21    8.90   29.00
  10  13  21   29.40    9.80
  11  12  21   79.29   13.60
  12  11  21   21.50    8.60
 -12 -11 -21   25.10   18.20
  13  10  21    1.70    5.90
 -13 -10 -21   16.60   16.40
 -13 -10 -21  -52.79   78.59
  14   9  21   12.60   14.30
  14   9  21   -2.80    5.20
 -14  -9 -21   64.69   72.49
 -14  -9 -21    9.00   15.00
 -15  -8 -21   -9.90   65.89
 -15  -8 -21    4.20   14.70
  16   7  21   -8.30   20.80
 -16  -7 -21    1.30   14.50
 -16  -7 -21   11.50   68.49
  17   6  21   34.10   13.30
 -17  -6 -21  -25.30   63.39
 -17  -6 -21    3.90   13.50
  18   5  21   37.80   16.50
 -18  -5 -21   86.39   17.90
 -19  -4 -21   82.09   18.90
  20   3  21   52.59   16.50
 -20  -3 -21   46.10   17.00
  21   2  21   60.69   18.00
 -21  -2 -21   50.89   20.80
  22   1  21    8.40   15.80
 -22  -1 -21   25.50   17.70
  23   0  21    6.50   17.00
 -23   0 -21   15.00   19.60
 -24   1 -21   53.69   28.40
  -8 -16 -22    3.70   34.90
  -9 -15 -22   48.60   32.40
  12  12  22    5.20    7.50
  13  11  22   -1.20    7.10
  14  10  22   -1.10    8.90
  14  10  22  -11.40   15.40
 -14 -10 -22    9.20   22.90
  15   9  22   26.70   15.80
 -15  -9 -22    5.90   16.30
  16   8  22   39.60   15.10
 -16  -8 -22    8.80   16.60
  17   7  22   29.70   15.00
 -17  -7 -22   61.19   18.20
  18   6  22   78.59   17.50
 -18  -6 -22   48.40   17.90
  19   5  22   47.80   15.50
 -19  -5 -22   36.70   16.50
  20   4  22   25.70   14.30
 -20  -4 -22   36.40   29.50
  21   3  22   18.10   15.40
 -21  -3 -22   22.20   17.50
  22   2  22   20.90   18.50
 -22  -2 -22   30.00   21.00
 -23  -1 -22   37.10   21.70
  -9 -16 -23   26.20   35.10
  14  11  23    5.80    7.60
  15  10  23    0.50    7.30
 -16  -9 -23   18.30   19.80
 -17  -8 -23   17.40   18.60
  18   7  23   -2.40   17.60
 -18  -7 -23   23.20   17.30
  19   6  23   75.19   20.00
 -19  -6 -23   54.49   21.50
  20   5  23   28.00   21.90
 -20  -5 -23   52.29   20.20
 -21  -4 -23   34.70   20.60
 -22  -3 -23   36.80   21.40
 -11 -15 -24  -19.60   31.40
 -18  -8 -24  114.39   42.10
 -19  -7 -24   16.90   21.40
 -20  -6 -24   58.19   22.60
 -21  -5 -24   26.10   22.10
 -14 -12 -30  -35.00   32.70
 -13 -12 -29   -5.70   36.00
 -12 -13 -29   20.40   33.60
 -12 -12 -28   -0.70   29.70
 -10 -14 -28   33.30   35.50
 -11 -12 -27   17.60   27.30
 -10 -13 -27   -2.00   30.70
  -9 -14 -27  -27.40   54.59
  -8 -15 -27   -9.20   35.60
 -21  -1 -26   38.00   24.30
 -20  -2 -26   23.60   20.20
 -19  -3 -26   24.00   30.20
 -18  -4 -26   23.80   18.80
  18   4  26   37.20   16.50
 -17  -5 -26   23.40   18.40
  17   5  26   32.30   18.50
  16   6  26    4.10   15.50
  15   7  26   97.99   22.70
  14   8  26   86.49   21.10
  13   9  26   11.30    6.50
  12  10  26  -10.60    6.70
 -10 -12 -26  -42.60   23.70
  -9 -13 -26    6.90   27.10
  -8 -14 -26    8.30   22.30
  -7 -15 -26  -24.20   33.90
 -22   1 -25    9.90   23.80
 -21   0 -25    9.10   20.60
 -20  -1 -25   15.50   20.70
  20   1  25   35.10   17.80
 -19  -2 -25   13.10   17.20
  19   2  25   13.50   14.80
 -18  -3 -25   18.30   16.10
  18   3  25   48.50   17.50
 -17  -4 -25   93.39   67.39
 -17  -4 -25   38.00   18.00
  17   4  25   79.09   18.20
 -16  -5 -25   73.79   19.20
 -16  -5 -25   24.60   65.99
  16   5  25   10.50   67.59
 -15  -6 -25   50.49   19.30
 -15  -6 -25  108.19   69.89
  15   6  25   27.10   65.99
  15   6  25   85.69   19.00
 -14  -7 -25   16.10   17.10
 -14  -7 -25   23.60   73.29
  14   7  25   -0.50   64.79
  14   7  25   37.10   15.00
  13   8  25  -54.79   66.09
  13   8  25    1.10   14.50
  12   9  25    0.80    5.40
  12   9  25   14.90   14.90
  11  10  25   32.90   17.20
  11  10  25   11.20    7.00
  10  11  25   14.70    7.30
  -9 -12 -25   -0.10   23.00
  -8 -13 -25   -3.20   25.10
  -7 -14 -25   25.50   28.10
  -6 -15 -25   25.30   31.00
  -5 -16 -25  -31.40   36.00
 -22   2 -24   17.50   23.00
 -21   1 -24    3.90   21.40
  21  -1  24   18.30   23.30
  20   0  24   46.10   19.50
 -19  -1 -24   74.99   19.00
  19   1  24   68.69   18.20
 -18  -2 -24   22.20   60.59
 -18  -2 -24   46.60   15.70
  18   2  24   45.40   19.30
 -17  -3 -24   44.60   70.49
 -17  -3 -24   11.80   14.00
  17   3  24   45.10   16.90
  17   3  24  119.49   62.89
 -16  -4 -24   19.30   14.40
 -16  -4 -24   -4.70   61.59
  16   4  24  -82.19   56.69
  16   4  24   22.70   12.90
 -15  -5 -24  -14.40   55.09
 -15  -5 -24   19.00   14.60
  15   5  24   24.60   13.10
  15   5  24    6.40   55.29
 -14  -6 -24   26.50   15.20
 -14  -6 -24   70.69   56.49
  14   6  24   35.10   14.00
  14   6  24    8.50   57.69
 -13  -7 -24   83.39   62.09
 -13  -7 -24   37.80   15.90
  13   7  24   31.10   63.09
 -12  -8 -24   11.10   16.30
 -12  -8 -24    5.20   63.59
  12   8  24   24.10   19.90
  12   8  24   37.60   58.99
  11   9  24    2.70    5.10
  11   9  24   -6.60   14.60
  11   9  24  -30.60   57.29
  10  10  24   -2.30    6.20
  10  10  24    4.90   13.70
   9  11  24   -7.90    6.30
   9  11  24    7.20   14.00
  -8 -12 -24    5.00   21.70
   8  12  24    3.60    7.30
  -7 -13 -24    7.70   19.00
  -6 -14 -24   23.50   27.80
  -5 -15 -24   12.90   31.00
  -4 -16 -24  -37.50   38.60
 -22   3 -23   24.60   25.10
 -21   2 -23   23.80   21.30
  21  -2  23   67.89   20.10
 -20   1 -23   27.60   18.00
  20  -1  23   43.60   16.30
 -19   0 -23   35.90   15.90
 -18  -1 -23   20.60   56.69
 -18  -1 -23   18.80   14.20
  18   1  23   44.20   15.40
  18   1  23    6.70   76.49
 -17  -2 -23   83.09   17.00
 -17  -2 -23   16.80   52.09
  17   2  23   72.09   17.00
  17   2  23   43.10   63.79
 -16  -3 -23   83.49   49.90
 -16  -3 -23  111.09   20.20
 -16  -3 -23   69.49   23.60
  16   3  23  212.08   59.49
 -15  -4 -23    6.90   50.09
 -15  -4 -23   67.79   15.30
 -15  -4 -23   69.59   19.00
  15   4  23   56.39   15.20
  15   4  23    4.70   49.90
 -14  -5 -23  -22.40   45.60
 -14  -5 -23   34.60   14.50
 -14  -5 -23   14.20   12.00
  14   5  23    5.50   48.10
  14   5  23   -6.60   11.20
 -13  -6 -23   14.30   16.10
 -13  -6 -23   40.60   48.30
 -13  -6 -23   -5.50   12.90
  13   6  23   11.70   11.60
  13   6  23  -17.50   48.40
 -12  -7 -23    1.90   13.00
  12   7  23  -41.50   45.30
  12   7  23   -1.40   11.30
 -11  -8 -23   -6.40   13.70
 -11  -8 -23   -4.60   55.99
  11   8  23  -14.00   12.50
  11   8  23  -32.00   46.30
 -10  -9 -23   53.39   65.49
 -10  -9 -23    3.90   15.00
  10   9  23  -10.20   47.70
  10   9  23    6.00   12.50
  10   9  23    9.30    5.30
  -9 -10 -23  -16.30   70.19
   9  10  23  -11.60   53.99
   8  11  23  158.98   26.20
   8  11  23  112.39   22.00
  -7 -12 -23  111.69   27.70
  -6 -13 -23   25.20   24.50
   6  13  23   50.39   10.90
  -5 -14 -23   20.20   19.90
  -4 -15 -23  -15.10   28.20
  -3 -16 -23  -11.70   33.30
  -2 -17 -23  -30.50   38.10
 -22   4 -22   -6.80   25.50
 -21   3 -22   21.90   19.20
  21  -3  22   10.40   17.90
 -20   2 -22   90.19   23.00
  20  -2  22   85.89   22.20
  19  -1  22  155.68   27.70
 -18   0 -22   90.59   19.00
 -18   0 -22  107.09   54.49
  18   0  22   11.10   67.69
 -17  -1 -22   76.19   17.10
 -17  -1 -22   61.49   48.90
 -17  -1 -22   62.49   21.10
  17   1  22  112.69   62.79
  17   1  22  101.29   17.90
 -16  -2 -22   22.70   17.10
 -16  -2 -22   17.90   42.20
 -16  -2 -22   29.30   12.00
  16   2  22   22.10   11.90
  16   2  22   32.60   46.60
 -15  -3 -22   -4.20   13.90
 -15  -3 -22   -0.70   41.70
 -15  -3 -22   -1.20   10.00
  15   3  22    8.20   48.00
  15   3  22  -11.20    9.60
 -14  -4 -22    6.40   13.70
 -14  -4 -22    9.50   10.00
 -14  -4 -22   -6.50   40.40
  14   4  22   19.50   11.70
  14   4  22    9.50   41.10
 -13  -5 -22    3.40   41.00
 -13  -5 -22   11.60   10.40
  13   5  22  -30.10   41.40
  13   5  22   -3.40   11.00
 -12  -6 -22   24.70   13.80
 -12  -6 -22   19.80   12.50
 -12  -6 -22   33.90   45.30
  12   6  22   51.09   11.90
  12   6  22   33.90   40.90
 -11  -7 -22   59.89   15.60
 -11  -7 -22   61.49   46.70
 -11  -7 -22   41.80   14.20
  11   7  22   82.89   39.70
 -10  -8 -22  101.39   20.30
 -10  -8 -22   63.99   55.99
  10   8  22  142.09   45.40
  -9  -9 -22  163.98   60.19
  -9  -9 -22  105.39   23.20
   9   9  22  131.79   18.90
   9   9  22   85.09   47.10
  -8 -10 -22   66.59   17.20
  -8 -10 -22   14.50   65.69
   8  10  22   49.40   48.70
   8  10  22   51.19    9.20
  -7 -11 -22   10.20   80.19
   7  11  22   56.79   52.29
   7  11  22   -3.50   18.10
   7  11  22    6.80    5.50
  -6 -12 -22    1.50   15.30
   6  12  22   -1.40    6.30
   6  12  22   33.90   13.70
  -5 -13 -22  -14.00   22.40
   5  13  22   45.10   14.00
   5  13  22   12.20    7.50
  -4 -14 -22   -3.20   25.50
  -3 -15 -22   40.40   29.40
  -2 -16 -22   -5.50   32.00
  -1 -17 -22  -38.10   41.70
 -22   5 -21   35.00   24.90
 -21   4 -21   62.89   24.10
  21  -4  21   81.29   21.80
 -20   3 -21   62.59   18.90
  20  -3  21   44.70   18.50
 -19   2 -21   48.70   19.50
  19  -2  21   86.59   17.30
 -18   1 -21   27.20   51.39
 -18   1 -21   17.90   12.50
  18  -1  21    1.20   11.60
  18  -1  21  -60.09   64.89
 -17   0 -21   25.10   12.30
 -17   0 -21   -5.00   16.00
 -17   0 -21   -3.30   46.00
  17   0  21    4.20   11.40
  17   0  21  -43.60   61.19
 -16  -1 -21   16.20   11.20
 -16  -1 -21    8.80   13.80
 -16  -1 -21   24.00   40.00
  16   1  21  -30.50   44.20
  16   1  21    8.40   11.00
 -15  -2 -21   25.90   38.00
 -15  -2 -21   11.80   10.20
  15   2  21    4.10    5.80
  15   2  21    7.10   43.30
  15   2  21   -6.50   10.20
 -14  -3 -21   46.50   13.40
 -14  -3 -21    3.80   37.50
 -14  -3 -21   32.00   11.30
  14   3  21   82.69   41.50
  14   3  21   18.80    7.50
  14   3  21   60.89   11.50
 -13  -4 -21   29.60   13.40
 -13  -4 -21   57.29   12.00
 -13  -4 -21   53.19   36.10
  13   4  21   77.59   37.20
  13   4  21   39.50    8.60
 -12  -5 -21  127.59   21.10
 -12  -5 -21   86.39   20.20
 -12  -5 -21  102.89   41.70
  12   5  21  130.19   20.40
  12   5  21   54.39   37.70
 -11  -6 -21   58.69   15.60
 -11  -6 -21  100.39   16.30
 -11  -6 -21  148.09   42.20
  11   6  21   76.29   15.90
  11   6  21   79.69   38.30
 -10  -7 -21   10.50   12.10
 -10  -7 -21   67.99   12.00
 -10  -7 -21   54.69   40.60
  10   7  21   26.20   12.10
  10   7  21   43.60   11.10
  10   7  21   66.99   35.80
  -9  -8 -21   47.30   45.30
  -9  -8 -21    8.00   11.40
  -9  -8 -21   11.40   10.80
   9   8  21  -25.70   35.60
   9   8  21   10.90    9.10
  -8  -9 -21   56.39   51.59
  -8  -9 -21   36.00   14.20
   8   9  21   38.90    7.50
   8   9  21   61.99   12.90
   8   9  21   61.89   38.80
  -7 -10 -21    1.00   14.10
  -7 -10 -21   79.99   60.79
   7  10  21   27.30    5.90
   7  10  21   58.69   44.40
  -6 -11 -21   17.90   68.69
  -6 -11 -21   24.00   16.90
   6  11  21   37.90   11.60
   6  11  21   25.20    6.50
   6  11  21    0.00   47.50
  -5 -12 -21    6.80   19.60
   5  12  21   42.50   55.39
   5  12  21   14.90    5.80
  -4 -13 -21  -35.40   20.90
   4  13  21    3.30   13.20
   4  13  21    0.70    6.30
  -3 -14 -21  -24.10   23.70
   3  14  21    5.00    7.20
  -2 -15 -21   29.10   27.40
  -1 -16 -21   20.30   30.80
   0 -17 -21   11.70   36.90
 -22   6 -20   -4.50   22.90
 -21   5 -20   -1.50   21.00
  21  -5  20   37.50   20.10
 -20   4 -20   16.80   18.50
  20  -4  20   23.00   31.40
 -19   3 -20    1.70   14.20
  19  -3  20    1.50   14.20
 -18   2 -20   -6.20   49.10
 -18   2 -20   -4.00   11.70
  18  -2  20   37.30   72.79
  18  -2  20   15.30   12.80
 -17   1 -20   46.20   43.60
 -17   1 -20   -5.70   14.30
 -17   1 -20    8.50   10.40
  17  -1  20  -44.90   53.99
  17  -1  20    4.80   10.90
 -16   0 -20   28.50   10.00
 -16   0 -20   20.90   12.70
 -16   0 -20   31.20   39.10
  16   0  20    4.90    9.60
  16   0  20   42.80   48.80
  16   0  20   10.30    6.00
 -15  -1 -20   12.00   36.10
 -15  -1 -20   46.60   10.50
 -15  -1 -20   23.40   13.20
  15   1  20   51.19   10.70
  15   1  20    8.80   43.90
  15   1  20   27.00    7.90
 -14  -2 -20  119.29   17.20
 -14  -2 -20   98.19   38.80
 -14  -2 -20   66.49   18.00
  14   2  20  105.29   42.60
  14   2  20   83.39   15.40
  14   2  20  123.49   18.50
 -13  -3 -20   13.90    9.80
 -13  -3 -20   34.60   32.70
 -13  -3 -20   24.40   10.90
  13   3  20   24.70    7.10
  13   3  20   44.30   10.10
  13   3  20   45.80   35.90
 -12  -4 -20    3.40    9.30
 -12  -4 -20   -0.20    7.70
 -12  -4 -20   22.90   32.80
  12   4  20   26.50   32.00
  12   4  20  -10.00    8.80
 -11  -5 -20   21.80   10.00
 -11  -5 -20   39.20   33.00
 -11  -5 -20   31.50    9.40
  11   5  20   19.30   30.90
 -10  -6 -20   66.49   16.20
 -10  -6 -20  105.89   17.40
 -10  -6 -20   86.09   40.40
  10   6  20   85.19   33.80
  10   6  20  103.79   17.60
  -9  -7 -20  162.18   42.20
  -9  -7 -20   74.49   15.50
  -9  -7 -20   74.99   15.30
   9   7  20  103.69   31.80
  -8  -8 -20   45.80   16.00
  -8  -8 -20   76.69   44.50
   8   8  20   52.19   14.80
   8   8  20   85.59   11.30
   8   8  20   72.69   35.80
  -7  -9 -20    2.20   44.20
  -7  -9 -20   56.79   12.30
  -7  -9 -20   15.70   11.00
   7   9  20   35.70    6.10
   7   9  20   57.99   36.90
   7   9  20   15.00   11.30
  -6 -10 -20    4.10   13.30
  -6 -10 -20   57.09   54.69
   6  10  20   18.40   38.20
   6  10  20   13.60    9.00
   6  10  20    7.00    4.20
  -5 -11 -20    2.40   14.60
  -5 -11 -20    2.60   64.69
   5  11  20  -16.20    4.90
   5  11  20   21.70   10.40
  -4 -12 -20   37.20   18.60
  -4 -12 -20   34.70   73.79
   4  12  20   -2.30   11.00
   4  12  20    8.50    5.50
   4  12  20   -4.10   48.50
  -3 -13 -20   13.40   20.50
   3  13  20   22.40   11.80
  -2 -14 -20   26.10   23.60
   2  14  20   21.70    8.30
   2  14  20   57.39   14.80
  -1 -15 -20   16.70   26.90
   0 -16 -20   13.60   28.60
   1 -17 -20   -4.60   34.80
   2 -18 -20  -35.00   39.70
 -21   6 -19  -14.20   22.10
  21  -6  19   35.00   20.00
 -20   5 -19    8.50   17.50
  20  -5  19   37.00   32.70
 -19   4 -19   -8.30   15.60
  19  -4  19   -2.80   14.10
 -18   3 -19   25.60   12.90
 -18   3 -19   11.90   52.19
  18  -3  19    3.30   12.00
  18  -3  19   65.29   76.49
 -17   2 -19   19.00   11.90
 -17   2 -19   16.20   44.20
 -17   2 -19   50.19   14.60
  17  -2  19   37.30   12.20
  17  -2  19   40.10   66.09
 -16   1 -19   29.40   10.80
 -16   1 -19   60.79   40.80
  16  -1  19   39.30    7.50
  16  -1  19   13.50   11.50
  16  -1  19   45.30   50.99
 -15   0 -19   -4.10    8.10
 -15   0 -19    5.80   11.20
 -15   0 -19   -2.70   35.00
  15   0  19   -5.80    4.80
  15   0  19   -8.50    8.60
  15   0  19   12.90   51.19
 -14  -1 -19   45.00   12.10
 -14  -1 -19   29.30   30.60
 -14  -1 -19   42.80   13.10
  14   1  19   60.69    9.60
 -13  -2 -19  123.49   35.20
 -13  -2 -19   99.29   18.90
 -13  -2 -19  113.79   18.00
  13   2  19   99.49   16.20
 -12  -3 -19  218.28   40.00
 -12  -3 -19  179.58   27.10
 -12  -3 -19  149.39   28.20
  12   3  19  179.08   27.30
 -11  -4 -19  239.28   35.00
 -11  -4 -19  210.48   35.10
  11   4  19  281.17   47.50
 -10  -5 -19  224.58   41.20
 -10  -5 -19  186.18   26.50
 -10  -5 -19  154.38   26.80
  10   5  19  188.88   37.40
  10   5  19  143.79   26.80
  -9  -6 -19   -0.20    8.00
  -9  -6 -19   -5.70   30.40
  -9  -6 -19   19.10    7.80
   9   6  19   13.90   24.70
   9   6  19   -0.70    7.00
   9   6  19    2.30    7.80
  -8  -7 -19    4.30    7.70
  -8  -7 -19   36.00   33.00
  -8  -7 -19    4.00    9.10
   8   7  19   10.60    8.60
   8   7  19    0.60   25.10
   8   7  19   10.20    7.40
  -7  -8 -19   -7.30   36.00
  -7  -8 -19    7.20    9.90
  -7  -8 -19    0.40    8.40
   7   8  19    2.30   29.40
   7   8  19    8.30    9.10
   7   8  19   -0.30    3.00
   7   8  19    4.30    7.80
  -6  -9 -19   17.20    9.30
  -6  -9 -19  -11.70   10.40
  -6  -9 -19   87.69   42.40
   6   9  19   10.10    8.40
   6   9  19   21.30    8.10
   6   9  19   13.70   31.50
  -5 -10 -19   40.40   14.60
  -5 -10 -19   29.20    9.60
  -5 -10 -19   97.09   51.09
   5  10  19   26.80   11.50
   5  10  19   60.59   36.20
   5  10  19   21.70    5.50
  -4 -11 -19   76.69   19.40
   4  11  19  181.58   44.90
   4  11  19   90.69   14.40
  -3 -12 -19  113.39   70.59
  -3 -12 -19   92.59   24.70
   3  12  19   45.30   49.99
   3  12  19  123.19   17.60
   2  13  19   67.79   11.40
   2  13  19   24.30   55.49
  -1 -14 -19   29.40   22.60
   1  14  19   29.20    8.20
   1  14  19   15.60   12.40
   0 -15 -19  -25.50   25.30
   1 -16 -19  -21.90   29.00
   2 -17 -19  -19.30   33.30
 -21   7 -18   16.50   14.00
  21  -7  18   35.40   23.50
  20  -6  18   42.70   19.00
 -19   5 -18    3.20   16.10
  19  -5  18   19.80   16.80
 -18   4 -18  -27.10   50.09
 -18   4 -18    7.80   13.20
  18  -4  18  -14.00   12.50
 -17   3 -18    5.30   12.50
 -17   3 -18   -0.50   10.50
 -17   3 -18   -1.50   44.00
  17  -3  18  -17.70   78.19
  17  -3  18   -3.10    5.30
  17  -3  18   -4.50   10.70
 -16   2 -18   96.69   42.30
 -16   2 -18  101.79   15.00
  16  -2  18   52.39   14.40
  16  -2  18   73.29   12.50
  16  -2  18  -19.50   50.59
 -15   1 -18  137.09   25.60
 -15   1 -18  196.38   43.00
 -15   1 -18  159.08   27.10
  15  -1  18  187.18   26.30
 -14   0 -18  335.67   47.90
 -14   0 -18  279.67   47.10
 -14   0 -18  351.26   61.89
  14   0  18  333.07   46.50
 -13  -1 -18  102.19   20.30
 -13  -1 -18  197.18   35.90
 -13  -1 -18  110.89   22.10
  13   1  18  139.89   19.30
  13   1  18  163.28   39.40
  13   1  18  121.69   21.00
 -12  -2 -18   63.39   12.70
 -12  -2 -18   64.69   27.50
  12   2  18   20.00   92.19
  12   2  18   79.49   30.20
  12   2  18   61.09   12.50
 -11  -3 -18   -1.70    6.00
 -11  -3 -18    9.50   24.30
 -11  -3 -18    4.50    8.10
  11   3  18   -4.50    6.60
  11   3  18    0.00    3.80
  11   3  18  -16.40   23.20
  11   3  18   39.90   59.29
 -10  -4 -18   26.20   23.00
 -10  -4 -18    5.10    6.90
 -10  -4 -18   -4.30    6.60
  10   4  18   -4.40    6.70
  10   4  18   -1.40   23.00
  10   4  18    0.00    6.10
  -9  -5 -18  -13.70   24.90
  -9  -5 -18    6.10    7.10
  -9  -5 -18   -6.90    6.90
   9   5  18    1.60    6.40
   9   5  18    7.70   21.70
   9   5  18    5.00    7.30
  -8  -6 -18   35.90   28.70
  -8  -6 -18   21.90    8.10
  -8  -6 -18   34.70    8.40
   8   6  18   29.10    8.20
   8   6  18   21.90   23.00
  -7  -7 -18  103.49   34.30
  -7  -7 -18  107.19   16.00
  -7  -7 -18   74.79   13.80
   7   7  18   69.89   13.80
   7   7  18   39.20   27.20
  -6  -8 -18  175.78   31.80
  -6  -8 -18  214.98   48.30
   6   8  18  231.08   31.60
   6   8  18  262.07   46.70
   6   8  18  198.58   29.80
  -5  -9 -18  114.69   42.30
  -5  -9 -18  121.99   19.70
   5   9  18  111.19   16.80
   5   9  18   83.09   34.60
  -4 -10 -18  112.19   49.00
  -4 -10 -18   81.09   16.20
   4  10  18  107.39   16.80
   4  10  18   90.19   14.10
   4  10  18   92.49   17.10
   4  10  18   85.99   34.40
  -3 -11 -18    7.90   13.20
  -3 -11 -18   53.09   13.40
  -3 -11 -18   72.39   53.59
   3  11  18   12.40    8.70
   3  11  18   34.80    6.00
   3  11  18   12.30   38.30
  -2 -12 -18   -3.30   13.90
  -2 -12 -18   -1.00   16.30
  -2 -12 -18   16.40   61.89
   2  12  18   18.10    8.60
   2  12  18   11.30    5.10
  -1 -13 -18   20.10   19.20
   1  13  18   16.80    6.00
   1  13  18  -47.80   50.79
   1  13  18   40.90   10.90
   0 -14 -18   43.00   23.70
   0  14  18   55.19   13.30
   0  14  18   40.50    9.00
   1 -15 -18  -17.10   23.90
   2 -16 -18   29.80   28.30
   3 -17 -18  -33.90   32.00
   4 -18 -18   -7.50   39.20
 -21   8 -17    8.50   15.20
  21  -8  17   49.90   24.00
 -20   7 -17    3.60   20.80
  20  -7  17    8.10   19.80
 -19   6 -17   42.30   12.40
  19  -6  17   51.59   17.00
 -18   5 -17   90.39   57.79
  18  -5  17   97.79   20.60
 -17   4 -17  103.59   17.30
 -17   4 -17   52.79   17.70
 -17   4 -17   72.89   43.70
  17  -4  17   77.39   13.20
  17  -4  17   28.40   62.39
 -16   3 -17  172.28   47.00
 -16   3 -17  175.58   24.20
  16  -3  17  106.99   23.60
  16  -3  17  136.09   21.00
 -15   2 -17   72.69   16.90
 -15   2 -17  146.79   43.60
 -15   2 -17  101.39   16.40
  15  -2  17   89.79   14.10
  15  -2  17    1.30   45.30
 -14   1 -17   90.39   33.90
 -14   1 -17   47.50   12.60
 -14   1 -17   63.39   10.90
  14  -1  17   41.20   10.80
  14  -1  17   37.70   37.90
  14  -1  17   57.09    9.60
 -13   0 -17    9.70    6.90
 -13   0 -17  -11.00   24.10
 -13   0 -17   -5.30    8.90
  13   0  17    2.20   32.30
  13   0  17   11.30    6.70
  13   0  17   -3.20    4.00
 -12  -1 -17   27.60   23.60
 -12  -1 -17    0.20    5.70
 -12  -1 -17    1.10    7.40
  12   1  17   25.00   64.19
  12   1  17    6.20   24.90
  12   1  17   -6.00    6.00
  12   1  17   -0.30    3.70
 -11  -2 -17    6.60    6.00
 -11  -2 -17   25.70   21.70
 -11  -2 -17    5.30    7.00
  11   2  17   -3.80    5.60
  11   2  17    3.30    3.60
  11   2  17    6.90   20.90
  11   2  17   26.00   44.80
 -10  -3 -17   20.40    6.50
 -10  -3 -17   15.30    7.40
 -10  -3 -17   33.00   21.40
  10   3  17  -26.40   54.39
  10   3  17   18.00    4.70
  10   3  17   58.59   22.20
  10   3  17   35.20    7.20
  -9  -4 -17  121.69   27.90
  -9  -4 -17   52.69   12.20
  -9  -4 -17   77.19   12.40
   9   4  17   87.69   12.80
   9   4  17   37.80   22.40
   9   4  17   62.49   12.00
  -8  -5 -17   82.79   12.30
  -8  -5 -17   52.29   11.80
  -8  -5 -17   89.89   27.10
   8   5  17   66.39   11.80
   8   5  17   39.50   22.10
  -7  -6 -17   13.20   24.20
  -7  -6 -17    4.60    6.20
  -7  -6 -17   17.80    7.40
   7   6  17   18.50   18.20
   7   6  17   10.90    6.50
  -6  -7 -17   29.80    8.30
  -6  -7 -17   47.20   28.80
   6   7  17   23.70    7.00
   6   7  17    9.80    6.30
   6   7  17   40.00   24.50
  -5  -8 -17   31.40    9.30
  -5  -8 -17   16.50   30.70
  -5  -8 -17   22.50    8.30
   5   8  17   49.70   11.90
   5   8  17   34.60    8.70
   5   8  17   37.60   24.00
  -4  -9 -17   89.69   38.10
  -4  -9 -17   41.00   10.40
  -4  -9 -17   50.59   12.50
   4   9  17   62.09   28.40
   4   9  17   55.69    8.50
   4   9  17   43.80   10.90
  -3 -10 -17   56.39   11.60
  -3 -10 -17  100.19   42.90
  -3 -10 -17   36.30   13.80
   3  10  17   60.89    9.30
  -2 -11 -17   43.50   10.90
  -2 -11 -17   55.89   16.40
  -2 -11 -17   40.70   49.50
  -2 -11 -17   45.50   13.70
   2  11  17   54.39   35.90
   2  11  17   44.20   12.50
   2  11  17   50.79    8.20
  -1 -12 -17   28.90   16.50
  -1 -12 -17   -9.90   13.10
   1  12  17   27.60    8.30
   1  12  17  -10.80   40.50
   1  12  17   12.40    4.80
   0 -13 -17  -21.60   18.40
   0  13  17    8.90    9.20
   0  13  17    3.50    4.90
  -1  14  17   -0.60   10.10
  -1  14  17    2.10    6.70
   2 -15 -17  -16.10   22.00
  -2  15  17  -19.90   11.20
   3 -16 -17   19.30   27.00
   4 -17 -17   33.30   32.40
   5 -18 -17   22.10   37.00
 -20   8 -16   63.09   15.40
  20  -8  16   55.79   22.40
 -19   7 -16   67.09   15.20
  19  -7  16   77.99   21.20
 -18   6 -16   70.89   14.40
  18  -6  16   63.39   19.30
 -17   5 -16   24.70    7.90
 -17   5 -16   20.80   47.40
 -17   5 -16   21.80   14.30
  17  -5  16   16.40    6.10
  17  -5  16    9.80   12.10
  17  -5  16  -19.40   70.59
 -16   4 -16  -15.70   20.90
 -16   4 -16   52.29   41.10
  16  -4  16   12.50   50.49
  16  -4  16    5.10    4.50
  16  -4  16   15.10    9.30
 -15   3 -16   15.40   10.40
 -15   3 -16    8.90    8.40
 -15   3 -16    1.90   32.90
  15  -3  16   -1.40    4.20
  15  -3  16   -6.20    7.80
  15  -3  16    4.50   43.40
 -14   2 -16   21.90   30.60
 -14   2 -16   -0.60    9.40
 -14   2 -16    4.50    7.40
  14  -2  16    4.70    3.80
  14  -2  16  -11.00    7.20
  14  -2  16   32.30   43.80
 -13   1 -16    4.60    7.50
 -13   1 -16  -21.00   24.10
 -13   1 -16    2.70    5.60
  13  -1  16    0.90    3.60
  13  -1  16  -36.00   29.60
  13  -1  16   12.20    6.30
 -12   0 -16   16.90    8.00
 -12   0 -16    2.70    5.90
 -12   0 -16   -4.50   21.70
  12   0  16    6.10    6.00
  12   0  16    4.70    3.70
  12   0  16   -3.60   26.40
  12   0  16  -10.10   50.19
 -11  -1 -16   86.69   22.20
 -11  -1 -16   45.40    9.60
  11   1  16   39.40    8.10
  11   1  16   32.40    6.50
  11   1  16   -6.90   51.29
 -10  -2 -16   53.19    9.20
  10   2  16   45.10    8.00
  -9  -3 -16   10.10    5.20
  -9  -3 -16   11.40    5.90
  -9  -3 -16    5.90   31.20
   9   3  16    8.10   18.00
   9   3  16   -1.50    4.90
   9   3  16    7.20    5.00
  -8  -4 -16   38.20   22.90
   8   4  16   86.79   21.30
  -7  -5 -16  103.29   16.20
  -7  -5 -16  144.29   27.70
  -7  -5 -16   87.19   16.30
   7   5  16  143.99   25.20
   7   5  16  107.39   16.10
   7   5  16   81.79   16.20
  -6  -6 -16  187.78   25.00
  -6  -6 -16  152.48   25.40
   6   6  16  148.19   24.70
   6   6  16  177.78   33.40
  -5  -7 -16  208.18   32.60
  -5  -7 -16  259.27   45.80
   5   7  16  280.67   41.20
   5   7  16  200.88   31.30
   5   7  16  219.78   32.10
  -4  -8 -16  139.09   32.50
  -4  -8 -16   76.59   13.80
   4   8  16  100.19   25.80
   4   8  16   84.59   13.80
   4   8  16   87.99   14.30
   4   8  16   76.69   12.30
  -3  -9 -16   36.80   33.40
  -3  -9 -16   53.89   10.60
  -3  -9 -16   35.10    8.80
   3   9  16   40.90    6.80
   3   9  16   47.00   25.10
   3   9  16   38.30    9.40
  -2 -10 -16   36.60   10.60
  -2 -10 -16    9.30    6.50
  -2 -10 -16  -13.30   38.00
  -2 -10 -16    2.10    9.20
   2  10  16   10.70   28.20
   2  10  16    8.90    8.10
   2  10  16    5.30    3.30
   2  10  16   -0.90    5.80
  -1 -11 -16   34.60   15.10
  -1 -11 -16   39.20   43.50
  -1 -11 -16    6.30    6.70
  -1 -11 -16  -15.10   11.00
   1  11  16  -19.40   31.50
   1  11  16    6.00    6.40
   1  11  16   11.60    9.70
   0 -12 -16    1.20   16.10
   0 -12 -16   -0.80   13.00
   0  12  16   -7.00    4.10
   0  12  16   12.10    7.30
   0  12  16   -0.40   38.30
   1 -13 -16   21.10   17.90
   1 -13 -16   -6.50   14.40
  -1  13  16    1.20    4.70
  -1  13  16   22.40   47.70
  -1  13  16   13.10    8.60
   2 -14 -16   25.20   20.50
  -2  14  16  -21.70   64.29
   3 -15 -16   42.20   24.00
  -3  15  16   33.30   13.20
   4 -16 -16   -7.80   29.20
   5 -17 -16   10.20   30.60
   6 -18 -16   -3.00   39.50
 -20   9 -15   -1.90   12.90
  20  -9  15   58.39   23.20
 -19   8 -15   11.10   11.90
  19  -8  15   26.00   18.80
 -18   7 -15   22.50    9.90
  18  -7  15   -8.70   15.60
 -17   6 -15    4.50    7.80
 -17   6 -15    9.30   14.20
 -17   6 -15   42.40   49.80
  17  -6  15   12.40   13.10
 -16   5 -15   21.80   12.60
 -16   5 -15   11.00    6.80
  16  -5  15   22.40    5.40
  16  -5  15   10.50   10.80
  16  -5  15  -55.19   60.09
 -15   4 -15   -1.60    5.20
 -15   4 -15  -64.69   48.00
 -15   4 -15   -0.70    9.90
 -15   4 -15   21.80   33.50
  15  -4  15    8.30   48.90
  15  -4  15   -4.70    3.70
  15  -4  15    4.00    7.80
 -14   3 -15   86.49   31.20
 -14   3 -15   67.89   13.50
  14  -3  15  -10.50   43.60
 -13   2 -15  108.59   30.00
 -13   2 -15   74.89   13.50
 -13   2 -15   58.79   13.70
  13  -2  15   76.99   12.90
  13  -2  15   80.69   11.80
  13  -2  15    8.10   34.60
 -12   1 -15   35.30    9.90
 -12   1 -15   54.19    9.00
 -12   1 -15   64.89   22.40
  12  -1  15   -4.40   44.90
  12  -1  15   65.79   30.40
  12  -1  15   38.50    8.70
  12  -1  15   44.80    7.60
 -11   0 -15  -10.70    6.70
 -11   0 -15    3.00    4.60
 -11   0 -15   -9.80   17.60
  11   0  15   -2.30    4.50
  11   0  15  -21.50   38.50
  11   0  15    4.90   22.20
 -10  -1 -15   57.39   12.10
 -10  -1 -15   95.49   22.00
 -10  -1 -15   77.99   13.60
  10   1  15   84.29   12.40
  10   1  15   73.39   11.30
  -9  -2 -15  286.27   42.80
  -9  -2 -15  281.47   42.60
  -9  -2 -15  275.07   48.40
   9   2  15  346.97   48.60
  -8  -3 -15  426.56   68.19
  -8  -3 -15  440.86   72.49
   8   3  15  502.85   71.99
   8   3  15  512.35   68.29
  -7  -4 -15  558.24   79.49
  -7  -4 -15  469.85   74.89
  -7  -4 -15  523.55   74.99
   7   4  15  545.85   77.99
   7   4  15  517.35   74.89
  -6  -5 -15  222.48   35.50
   6   5  15  240.78   35.50
   6   5  15  237.48   41.10
   6   5  15  264.47   35.60
  -5  -6 -15   86.09   15.70
  -5  -6 -15  157.08   27.70
   5   6  15  144.39   24.00
   5   6  15   98.09   16.20
  -4  -7 -15   30.60   25.10
  -4  -7 -15   13.10    6.90
   4   7  15   34.10   19.10
   4   7  15   21.50    6.60
   4   7  15   29.60    4.50
  -3  -8 -15   -5.90   25.00
  -3  -8 -15    0.00    6.70
  -3  -8 -15   -0.20    5.50
   3   8  15    4.50    5.20
   3   8  15    0.60    2.20
   3   8  15   13.40    5.00
   3   8  15    9.00   19.10
  -2  -9 -15   12.30   28.90
  -2  -9 -15  -13.60    8.10
  -2  -9 -15    1.70    5.80
   2   9  15    1.70    2.50
   2   9  15   11.50    6.50
   2   9  15   -0.20    5.20
   2   9  15    6.30   20.90
  -1 -10 -15   14.80    6.70
  -1 -10 -15   -4.30   36.10
  -1 -10 -15   14.00    9.70
  -1 -10 -15   40.00   13.20
   1  10  15    8.60   24.70
   1  10  15    3.20    7.40
   0 -11 -15   38.90   10.30
   0 -11 -15  107.09   42.60
   0 -11 -15   30.80   15.80
   0 -11 -15   55.59   13.80
   0  11  15   58.39    8.70
   0  11  15  106.29   34.40
   1 -12 -15   94.09   19.30
   1 -12 -15   72.09   20.10
  -1  12  15   97.59   41.60
  -1  12  15   75.19   12.30
  -1  12  15   71.79   16.70
   2 -13 -15   23.70   16.70
  -2  13  15   60.09    9.30
   3 -14 -15   12.50   18.90
  -3  14  15   15.70   15.50
  -3  14  15   -3.20   58.49
   4 -15 -15   33.80   23.30
   5 -16 -15  -18.70   25.60
   6 -17 -15    2.20   29.70
  20 -10  14   53.29   27.30
  19  -9  14   47.70   21.70
 -18   8 -14   -6.30    9.30
  18  -8  14   -9.50   18.30
 -17   7 -14    5.80    7.90
 -17   7 -14   42.30   82.29
  17  -7  14   13.50   14.90
 -16   6 -14   -8.90   12.10
 -16   6 -14  -16.00   42.00
 -16   6 -14   -4.00    5.80
  16  -6  14   29.40   64.39
  16  -6  14   -3.90   11.20
  16  -6  14   -4.60    4.10
 -15   5 -14    6.20   10.80
 -15   5 -14   27.80   37.80
 -15   5 -14   14.90    5.50
  15  -5  14  -53.29   45.90
  15  -5  14   27.10    9.50
  15  -5  14   11.50    4.10
 -14   4 -14   -0.80    4.00
 -14   4 -14   -8.20    8.40
 -14   4 -14   -6.10   31.90
  14  -4  14   -3.30    3.20
  14  -4  14  -11.50   37.70
 -13   3 -14   27.50    6.10
 -13   3 -14   32.60   27.90
 -13   3 -14   34.80    9.40
  13  -3  14   43.70    8.20
  13  -3  14  -24.00   40.70
 -12   2 -14  270.97   43.30
  12  -2  14  307.97   43.40
  12  -2  14  304.27   42.80
 -11   1 -14  543.45   79.59
  11  -1  14  512.95   79.39
  11  -1  14  597.94   79.69
 -10   0 -14  899.21  131.69
  10   0  14  913.41  136.39
  10   0  14  927.41  131.79
  -9  -1 -14  533.35   74.29
  -9  -1 -14  493.65   77.79
  -9  -1 -14  458.85   74.39
   9   1  14  558.24   74.29
  -8  -2 -14   65.59   21.20
  -8  -2 -14   98.29   14.40
   8   2  14   92.39   14.60
  -5  -5 -14   12.80    4.90
  -5  -5 -14   13.30    5.30
  -5  -5 -14  -20.60   15.70
   5   5  14   21.30   14.20
   5   5  14   13.90    4.80
   5   5  14   19.60    4.80
  -4  -6 -14   63.59   20.30
  -4  -6 -14   58.69    9.30
   4   6  14   43.40   16.70
   4   6  14   40.50    8.40
  -3  -7 -14   63.29   11.80
  -3  -7 -14   60.79   11.00
  -3  -7 -14   90.09   23.70
   3   7  14   71.29   11.00
   3   7  14   57.09   19.80
   3   7  14   59.49   11.50
   3   7  14   73.69   10.10
  -2  -8 -14  418.96   60.09
  -2  -8 -14  337.77   49.80
   2   8  14  350.66   56.09
   2   8  14  294.17   49.70
   2   8  14  361.96   49.10
  -1  -9 -14   79.79   32.70
  -1  -9 -14  104.69   14.50
   1   9  14   70.79   13.10
   1   9  14  103.09   15.00
   1   9  14   95.59   27.50
   0 -10 -14   79.09   14.60
   0 -10 -14   68.39   14.80
   0 -10 -14   67.39   35.60
   0  10  14  103.09   28.80
   0  10  14   56.29   13.40
   0  10  14   84.49   11.60
   1 -11 -14    7.70   13.90
   1 -11 -14    7.60    5.40
   1 -11 -14   -4.80   10.10
  -1  11  14   35.40   31.30
  -1  11  14    7.60    3.40
  -1  11  14   15.60    5.60
   2 -12 -14   44.20   16.00
   2 -12 -14   24.30    7.50
  -2  12  14   47.60   36.20
  -2  12  14   15.00    4.60
  -2  12  14   14.90    7.10
  -2  12  14   13.30   11.00
   3 -13 -14   15.70   14.80
   3 -13 -14   30.30   17.40
  -3  13  14   -6.40   46.90
   4 -14 -14   68.19   21.60
  -4  14  14  -33.20   57.69
  -4  14  14   48.20   11.40
  -5  15  14   26.80   11.70
   6 -16 -14  -21.40   24.30
   7 -17 -14   -9.60   27.40
 -19  10 -13   22.50   11.70
  19 -10  13   10.90   23.00
 -18   9 -13  -11.50   10.20
  18  -9  13   -6.50   19.70
 -17   8 -13   -6.70    7.80
  17  -8  13   14.80   15.80
 -16   7 -13   21.60   44.40
 -16   7 -13   15.20   14.10
 -16   7 -13   22.80    8.00
  16  -7  13   57.09   68.69
  16  -7  13   28.60    6.10
  16  -7  13   11.60   13.10
 -15   6 -13   70.39   18.20
 -15   6 -13  106.69   40.20
  15  -6  13  112.79   17.50
 -14   5 -13  342.37   47.40
  14  -5  13  274.97   47.00
  14  -5  13  327.47   45.90
 -13   4 -13  335.17   52.49
 -13   4 -13  322.37   53.29
 -13   4 -13  379.76   65.29
  13  -4  13  410.06   52.39
 -12   3 -13  214.98   34.40
 -12   3 -13  239.38   35.30
  12  -3  13  259.97   35.00
  11  -2  13  139.59   19.70
  11  -2  13  122.29   19.00
 -10   1 -13   33.20   16.90
 -10   1 -13    9.60    4.30
 -10   1 -13   12.00    5.70
  10  -1  13   12.90    3.00
  10  -1  13    8.60    3.80
  10  -1  13  -38.50   31.10
  10  -1  13    1.00   20.10
  -9   0 -13   -5.10    5.00
  -9   0 -13   -4.90   14.70
  -9   0 -13    4.80    3.10
   9   0  13  -48.00   33.40
   9   0  13    0.70   16.50
   9   0  13   -2.60    2.20
   9   0  13   -1.20    3.50
  -8  -1 -13   28.40   13.80
   8   1  13   -2.30   18.10
   8   1  13   34.20   14.40
   8   1  13   11.80    3.00
  -6  -3 -13   81.79   11.50
  -6  -3 -13   70.79   11.30
   6   3  13   62.19   11.20
   6   3  13   69.19   16.60
  -5  -4 -13  127.29   22.90
  -5  -4 -13   97.99   15.90
   5   4  13  108.49   21.10
   5   4  13  103.59   15.70
  -4  -5 -13  539.85   75.09
  -4  -5 -13  511.15   78.59
   4   5  13  501.95   74.99
  -3  -6 -13   72.99   12.70
   3   6  13  103.59   19.60
   3   6  13   78.39   12.50
  -2  -7 -13   58.59   11.80
  -2  -7 -13   52.19   22.80
  -2  -7 -13   52.39   10.80
   2   7  13   68.39    9.90
   2   7  13   85.09   19.60
   2   7  13   78.59   10.70
   1   8  13   58.69    9.70
   1   8  13   44.70    7.60
   1   8  13   95.69   21.10
   0  -9 -13   92.49   18.30
   0   9  13  120.69   27.90
   0   9  13   89.49   13.60
   1 -10 -13  224.08   36.10
   1 -10 -13  226.98   34.20
   1 -10 -13  204.78   32.90
   1 -10 -13  302.37   50.49
  -1  10  13  279.27   47.30
   2 -11 -13  108.79   19.00
   2 -11 -13  101.29   16.50
  -2  11  13  100.29   16.50
  -2  11  13  131.19   35.00
   3 -12 -13   48.50   13.60
   3 -12 -13   34.80    8.30
   3 -12 -13   19.30   15.20
  -3  12  13   29.00    6.10
  -3  12  13   54.99   37.30
  -3  12  13   36.70   12.50
   4 -13 -13   -2.40   13.50
   4 -13 -13   18.00   16.00
  -4  13  13    3.60    7.60
  -4  13  13  -22.50   44.60
   5 -14 -13   -4.90   18.10
  -5  14  13   32.40   57.19
  -5  14  13  -21.50    9.10
   6 -15 -13   18.80   21.30
  -6  15  13   -6.30   11.20
   7 -16 -13   17.10   26.60
   8 -17 -13  -13.00   25.90
 -19  11 -12  -15.00   11.50
  19 -11  12   14.20   27.10
  18 -10  12   29.00   26.20
 -17   9 -12   28.30    9.40
  17  -9  12   40.80   17.80
 -16   8 -12  117.29   58.39
 -16   8 -12   88.79   24.40
 -16   8 -12  109.89   20.40
  16  -8  12  144.29   19.20
  16  -8  12  119.39   24.40
 -15   7 -12  106.29   17.30
 -15   7 -12  168.98   71.79
  15  -7  12   24.90   56.49
 -14   6 -12  181.88   42.60
 -14   6 -12  122.09   22.10
 -14   6 -12  130.09   24.40
  14  -6  12  174.08   24.30
  14  -6  12  159.38   21.70
 -13   5 -12   74.69   31.40
 -13   5 -12   35.70    9.90
 -13   5 -12   27.20    6.50
  13  -5  12   46.00    9.40
  13  -5  12  -49.40   34.80
  13  -5  12   33.60    6.00
 -11   3 -12   57.79   29.30
 -11   3 -12   13.20    6.00
 -11   3 -12    3.10   21.00
  11  -3  12   -5.60   27.70
  11  -3  12   13.70    3.20
 -10   2 -12   77.79   20.00
 -10   2 -12   72.89   25.90
 -10   2 -12   29.90    5.50
  10  -2  12   -0.10   26.20
  10  -2  12  -20.90   39.10
  -9   1 -12   18.10    4.30
  -9   1 -12   40.60   15.50
   9  -1  12  -19.90   25.30
   9  -1  12   12.00    3.20
   9  -1  12   22.40    4.40
   9  -1  12   36.40   20.90
  -8   0 -12   55.49    8.00
  -8   0 -12   46.30    7.60
   8   0  12   40.30   16.20
   8   0  12   38.10    7.00
  -7  -1 -12   38.90   13.20
  -7  -1 -12   25.30    6.20
  -7  -1 -12   28.40    5.20
   7   1  12   27.00   13.30
   7   1  12   24.60    4.60
   7   1  12   -6.60   21.60
  -6  -2 -12  235.78   41.30
   6   2  12  293.37   41.70
   6   2  12  272.17   38.40
   6   2  12  254.17   38.30
  -5  -3 -12   20.10    4.10
  -5  -3 -12   28.10   12.40
  -5  -3 -12    9.90    4.40
   5   3  12   10.90    4.10
   5   3  12    9.40   10.30
   5   3  12   10.30    3.90
  -4  -4 -12   -4.70    3.00
  -4  -4 -12    0.40   11.70
  -4  -4 -12   -4.40    3.20
   4   4  12   -1.90    2.90
   4   4  12    3.80    2.90
   4   4  12   -0.90    9.50
  -3  -5 -12  284.47   38.50
  -3  -5 -12  205.78   34.00
   3   5  12  250.67   37.60
   3   5  12  234.98   34.10
  -2  -6 -12  437.06   69.19
  -2  -6 -12  489.95   69.39
  -2  -6 -12  511.05   73.19
   2   6  12  473.85   68.89
   2   6  12  513.75   72.19
  -1  -7 -12  445.36   61.49
  -1  -7 -12  436.96   66.59
  -1  -7 -12  411.46   61.79
   1   7  12  448.76   65.69
   1   7  12  402.36   61.19
   0  -8 -12  283.17   48.60
   0   8  12  212.78   43.80
   0   8  12  266.37   37.80
   1  -9 -12   62.99   12.40
   1  -9 -12  127.79   30.60
   1  -9 -12   63.49   11.20
   1  -9 -12   74.89   14.90
  -1   9  12   83.49   11.50
  -1   9  12   64.29   10.50
  -1   9  12   76.59   23.50
   2 -10 -12    8.90    9.00
   2 -10 -12   31.10    6.10
   2 -10 -12   48.40   10.40
  -2  10  12   28.70    5.90
  -2  10  12   22.70    4.60
  -2  10  12   20.20    7.80
  -2  10  12   29.70   24.10
   3 -11 -12   -1.40    5.00
   3 -11 -12    3.20   13.00
   3 -11 -12    4.10    8.90
  -3  11  12    3.80    7.80
  -3  11  12   10.00    5.00
  -3  11  12  -13.10   27.00
  -3  11  12    6.70    3.10
   4 -12 -12   12.50    6.00
   4 -12 -12  -12.90   11.30
   4 -12 -12    3.10   12.20
  -4  12  12   -4.70    5.70
  -4  12  12   -0.70   34.60
  -4  12  12    8.20    9.80
   5 -13 -12  -32.60   15.10
   5 -13 -12   -5.70   15.10
  -5  13  12    7.60    6.80
  -5  13  12  -12.00   44.90
   6 -14 -12    5.70   19.90
   6 -14 -12   26.60   18.20
  -6  14  12   24.60   56.59
  -6  14  12   25.40    9.30
   7 -15 -12   32.40   21.50
  -7  15  12   31.70   11.40
   8 -16 -12   29.60   23.20
  18 -11  11   65.39   25.00
  17 -10  11   93.49   23.60
  16  -9  11   54.89   18.60
 -15   8 -11   -7.20   11.90
 -15   8 -11   -6.30   47.20
 -15   8 -11    5.90    5.60
  15  -8  11    0.60    4.40
  15  -8  11   -1.60   12.50
  15  -8  11   -3.80   54.39
 -14   7 -11   52.39   41.60
 -14   7 -11   38.80    7.50
 -14   7 -11   33.00   11.50
  14  -7  11  -11.50   46.70
  14  -7  11   46.80   11.80
 -13   6 -11  246.08   63.79
 -13   6 -11  190.28   31.70
 -13   6 -11  126.49   46.10
 -13   6 -11  215.78   30.20
  13  -6  11  205.38   31.60
  13  -6  11  205.58   29.90
 -12   5 -11  201.58   29.40
 -12   5 -11  206.58   29.00
 -12   5 -11  170.78   28.10
  12  -5  11  200.48   29.20
 -11   4 -11   43.00   23.70
 -11   4 -11   37.50    7.20
 -11   4 -11   47.20    9.20
 -11   4 -11   43.10   37.50
  11  -4  11    6.70   33.50
  11  -4  11   46.10    6.90
  11  -4  11   43.80    8.50
 -10   3 -11   36.40   31.20
 -10   3 -11   17.00   18.80
 -10   3 -11    0.50    4.60
  10  -3  11    5.80   27.40
  -9   2 -11   81.99   20.90
  -9   2 -11   86.29   14.20
   9  -2  11   89.79   13.30
   9  -2  11   99.09   14.00
   9  -2  11   36.30   36.10
  -8   1 -11  113.99   20.20
  -8   1 -11  154.98   25.80
  -8   1 -11  142.49   19.40
   8  -1  11  133.79   19.20
   8  -1  11  120.99   19.40
  -7   0 -11   -1.00    3.40
  -7   0 -11   -1.40    9.80
  -7   0 -11    0.20    2.60
   7   0  11    0.10    1.80
   7   0  11   34.00   22.30
   7   0  11    1.10    2.70
   7   0  11  -14.30   12.60
  -6  -1 -11   50.49    9.00
  -6  -1 -11   52.69    8.60
   6   1  11   56.39    8.20
  -5  -2 -11  662.33   88.29
   5   2  11  586.34   88.19
   5   2  11  615.74   88.19
   5   2  11  574.64   89.69
  -4  -3 -11 1269.37  199.08
  -4  -3 -11 1388.96  197.78
  -4  -3 -11 1516.95  197.78
   4   3  11 1305.97  198.88
  -3  -4 -11  788.92  120.19
   3   4  11  880.21  120.19
  -2  -5 -11  706.63   99.59
   2   5  11  656.33   98.99
   2   5  11  665.53   96.99
  -1  -6 -11  479.25   68.49
   1   6  11  451.55   68.39
   1   6  11  431.96   68.29
   1   6  11  512.75   68.59
   1   6  11  517.35   71.39
   0  -7 -11   33.70    5.10
   0  -7 -11   36.60   18.00
   0   7  11   12.30   14.60
   0   7  11   25.20    4.00
   0   7  11   16.70    4.60
   1  -8 -11   -4.50    4.90
   1  -8 -11   12.30    6.80
   1  -8 -11   22.80   20.50
   1  -8 -11   -7.20    3.30
  -1   8  11    6.00   15.90
  -1   8  11   -0.60    4.30
  -1   8  11   -3.00    1.70
  -1   8  11    5.20   33.50
  -1   8  11   -2.90    3.00
   2  -9 -11   -6.10    6.80
   2  -9 -11   -2.00   10.00
  -2   9  11    3.30    3.40
  -2   9  11    2.40    5.20
  -2   9  11   -9.70   20.40
  -2   9  11    5.10   17.50
  -2   9  11    4.60    2.00
   3 -10 -11   10.70   11.00
   3 -10 -11   24.80    8.80
   3 -10 -11    8.60    4.50
  -3  10  11   21.90   22.30
  -3  10  11  -20.80   55.99
  -3  10  11   15.70    4.80
  -3  10  11   15.60    7.00
  -3  10  11   11.40    3.10
   4 -11 -11   26.60   11.30
   4 -11 -11   68.39   14.30
  -4  11  11   55.59   28.20
  -4  11  11   32.30   10.30
   5 -12 -11  127.49   23.30
  -5  12  11  119.09   19.10
  -5  12  11  132.39   22.10
  -5  12  11   62.59   40.60
   6 -13 -11   72.09   20.50
   6 -13 -11   90.29   22.40
  -6  13  11  108.29   47.90
  -6  13  11   99.89   16.20
   7 -14 -11   -2.50   19.30
   7 -14 -11   38.20   18.00
  -7  14  11   35.20   57.79
  -7  14  11   30.50    9.40
   8 -15 -11  -22.90   18.60
  -8  15  11   -9.70    8.70
   9 -16 -11   -1.90   25.60
  18 -12  10   40.30   26.50
  17 -11  10   13.60   20.00
  16 -10  10   59.29   19.30
 -15   9 -10   49.70   16.40
 -15   9 -10   33.10    8.90
  15  -9  10   48.50    8.70
  15  -9  10   63.29   16.10
 -14   8 -10   84.59   16.80
 -14   8 -10   28.90   67.99
 -14   8 -10   78.29   49.00
 -14   8 -10   60.09   12.20
  14  -8  10   52.79   58.69
  14  -8  10   95.19   16.20
 -13   7 -10   11.10    9.50
 -13   7 -10   20.00   36.90
 -13   7 -10   20.80    6.30
 -13   7 -10  -12.00   56.49
  13  -7  10   34.20   11.20
  13  -7  10   31.70    5.30
  13  -7  10   -1.70   47.70
 -12   6 -10   10.50    8.70
 -12   6 -10   30.10    7.80
 -12   6 -10   83.69   30.70
 -12   6 -10   42.20   48.80
  12  -6  10   20.60    8.40
  12  -6  10    2.00   35.70
  12  -6  10   36.20    5.70
 -11   5 -10    8.90   46.80
 -11   5 -10   -0.20    6.20
 -11   5 -10    4.90    5.30
 -11   5 -10   33.70   25.70
 -11   5 -10   -1.20    2.70
  11  -5  10   -1.90    5.30
  11  -5  10    2.70    2.20
  11  -5  10   -0.70   29.50
 -10   4 -10   18.10   19.90
  -9   3 -10   94.09   21.00
   9  -3  10   39.80    8.50
   9  -3  10   50.59    7.50
  -8   2 -10  323.67   44.30
  -8   2 -10  309.47   44.70
   8  -2  10  286.97   44.20
  -7   1 -10  913.21  120.59
  -7   1 -10  706.03  122.09
   7  -1  10  820.32  120.49
   7  -1  10  879.81  120.29
   6   0  10 1859.91  267.57
  -5  -1 -10 1401.36  217.28
   5   1  10 1688.93  217.28
   5   1  10 1561.14  217.28
   5   1  10 1379.76  218.38
  -4  -2 -10  724.43  110.09
   4   2  10  804.12  110.09
  -3  -3 -10  142.49   20.50
  -3  -3 -10  158.68   23.60
   3   3  10  126.79   20.40
   3   3  10  146.89   22.90
  -2  -4 -10   -2.90    2.70
  -2  -4 -10   12.00    9.20
   2   4  10    2.20    2.20
   2   4  10    3.60    2.70
   2   4  10   10.90    7.60
  -1  -5 -10   -9.50    9.80
  -1  -5 -10   12.50    3.90
   1   5  10   18.30    9.80
   1   5  10   13.10    2.20
   1   5  10   12.90    3.40
   0  -6 -10   13.90    4.40
   0  -6 -10   24.00   13.50
   0   6  10   14.80    3.30
   0   6  10   13.70    2.40
   0   6  10   12.90   11.10
   1  -7 -10  124.49   17.70
   1  -7 -10  120.59   15.80
   1  -7 -10  114.19   23.90
   1  -7 -10   91.39   15.00
  -1   7  10   91.49   20.70
  -1   7  10  118.89   15.50
  -1   7  10   85.29   14.70
   2  -8 -10  113.09   29.00
   2  -8 -10  106.69   20.20
  -2   8  10  152.08   19.40
  -2   8  10  127.69   19.10
   3  -9 -10  125.19   18.00
  -3   9  10  103.09   16.50
   4 -10 -10  225.58   32.70
   4 -10 -10  221.48   32.80
  -4  10  10  190.08   30.70
  -4  10  10  223.38   32.00
  -4  10  10  248.08   43.90
   5 -11 -10    9.40    4.90
   5 -11 -10   20.70   11.50
   5 -11 -10   12.60    3.20
   5 -11 -10    0.40    9.60
  -5  11  10   20.50    5.10
  -5  11  10   27.90   28.30
  -5  11  10   15.90    8.70
   6 -12 -10    8.70    5.10
   6 -12 -10    9.90   13.00
   6 -12 -10    3.90   12.50
  -6  12  10    2.90   10.40
  -6  12  10   37.30   36.80
   7 -13 -10   73.99   17.10
   7 -13 -10   42.80   17.40
  -7  13  10   37.70   50.99
  -7  13  10   45.10   10.10
   8 -14 -10   87.69   20.20
   8 -14 -10   42.70   22.00
  -8  14  10  104.69   65.39
  -8  14  10   77.69   13.80
   9 -15 -10   61.79   23.20
  10 -16 -10   11.40   22.20
 -17  12  -9   31.60   11.40
  17 -12   9   48.30   26.70
 -16  11  -9   22.70    9.10
  16 -11   9   33.70   20.70
 -15  10  -9    5.40    6.10
  15 -10   9    0.30   16.50
 -14   9  -9  -32.40   65.69
 -14   9  -9   -4.30    5.30
 -14   9  -9  -12.40   11.80
 -14   9  -9  -43.10   49.60
  14  -9   9    8.90   12.60
  14  -9   9  -58.69   81.19
  14  -9   9   -5.20    5.30
 -13   8  -9   -5.10    9.00
 -13   8  -9   -3.90    4.10
 -13   8  -9   11.00   56.99
 -13   8  -9   -7.30   42.60
  13  -8   9   -4.80    4.20
  13  -8   9   16.00   50.99
  13  -8   9   15.00    9.50
 -12   7  -9  -54.69   33.10
 -12   7  -9    1.80    3.80
 -12   7  -9   39.40   48.70
 -12   7  -9    1.70    7.70
  12  -7   9    2.30    3.00
  12  -7   9  -11.20   39.60
  12  -7   9   17.80    7.90
 -10   5  -9  313.87   45.40
 -10   5  -9  317.27   46.70
 -10   5  -9  266.77   45.90
  10  -5   9  344.17   45.30
  -9   4  -9  453.55   64.09
  -9   4  -9  426.66   63.89
  -9   4  -9  445.66   70.39
   9  -4   9  447.56   64.29
   8  -3   9  361.56   52.49
  -7   2  -9  262.17   39.40
  -7   2  -9  253.97   43.00
   7  -2   9  268.57   39.30
   7  -2   9  283.77   39.00
  -6   1  -9   76.49   11.80
   6  -1   9   85.89   11.70
   6  -1   9  103.09   18.30
   6  -1   9   68.79   11.30
  -5   0  -9    9.60    7.40
  -5   0  -9    6.90    2.60
  -5   0  -9   -0.50    1.90
  -5   0  -9  -12.20   16.50
   5   0   9    4.90   15.80
   5   0   9    0.00    1.30
   5   0   9   -1.50    2.10
  -4  -1  -9   49.90   10.20
  -4  -1  -9   38.20    6.90
  -4  -1  -9   40.10    6.90
   4   1   9   39.40    6.90
   4   1   9   51.49    6.90
   4   1   9   64.59   11.70
  -3  -2  -9   21.70    7.70
  -3  -2  -9   16.60    3.20
  -3  -2  -9   14.40    3.40
   3   2   9   18.40    3.40
   3   2   9   11.20    6.50
   3   2   9   23.50   15.00
  -2  -3  -9   26.80    5.60
  -2  -3  -9   36.60    5.70
  -2  -3  -9   33.70    9.20
   2   3   9   40.90    8.50
  -1  -4  -9   -2.60    2.30
  -1  -4  -9    5.00    2.40
  -1  -4  -9   -0.10    8.20
   1   4   9   -1.00    2.20
   1   4   9   -1.60    2.10
   1   4   9    2.30    0.90
   1   4   9   -2.90    6.90
   0  -5  -9   41.50    6.30
   0  -5  -9   26.70    5.90
   0  -5  -9   51.49   11.70
   0   5   9   14.90   10.40
   0   5   9   38.60    6.30
   0   5   9   35.70    5.20
  -1   6   9  242.38   33.50
  -1   6   9  201.78   36.70
   2  -7  -9   46.10   16.80
   2  -7  -9   24.00    7.00
   2  -7  -9   36.80    5.80
  -2   7   9   43.10   14.00
  -2   7   9   33.80   31.90
  -2   7   9   32.60    5.20
   3  -8  -9   55.79    8.30
   3  -8  -9   46.70   10.30
   3  -8  -9   41.20    6.00
  -3   8   9   40.50    7.80
  -3   8   9   48.30   17.30
  -3   8   9   38.10    6.60
  -3   8   9   29.60    6.10
   4  -9  -9   46.00    9.40
   4  -9  -9   64.49   11.70
   4  -9  -9   35.30    7.20
   4  -9  -9   47.40    6.60
  -4   9   9   58.99   20.50
  -4   9   9   55.89    8.60
  -4   9   9   15.90   44.70
  -4   9   9   33.50    6.70
   5 -10  -9  247.48   41.40
   5 -10  -9  276.97   40.30
  -5  10   9  218.38   49.20
  -5  10   9  302.37   40.40
  -5  10   9  289.37   41.50
   6 -11  -9  236.78   37.50
   6 -11  -9  224.38   36.40
   6 -11  -9  240.78   34.30
  -6  11   9  240.98   48.80
   7 -12  -9   50.19   17.80
   7 -12  -9   77.19   11.80
  -7  12   9   81.19   15.60
  -7  12   9   84.79   40.90
  -7  12   9   78.29   13.70
   8 -13  -9   37.90   14.10
   8 -13  -9    6.40   14.60
  -8  13   9   19.20    7.20
  -8  13   9   24.10   51.09
   9 -14  -9   -6.20   20.50
   9 -14  -9  -17.40   14.40
  -9  14   9   -5.00   64.59
  -9  14   9   -4.60    7.20
  10 -15  -9    7.90   19.20
 -17  13  -8  -10.40   16.10
  17 -13   8    0.90   26.70
 -16  12  -8  -10.00    8.40
  16 -12   8   -7.70   22.20
 -15  11  -8    5.70    7.00
  15 -11   8   -9.00   19.40
 -14  10  -8  -12.90   13.70
 -14  10  -8    4.60    5.80
  14 -10   8   14.90   14.90
  14 -10   8    2.20    5.80
 -13   9  -8   12.90   64.49
 -13   9  -8   39.90   51.69
  13  -9   8   20.40   53.89
  13  -9   8   20.70    6.70
  13  -9   8   38.20   12.20
 -12   8  -8   81.89   14.40
 -12   8  -8   -6.70   44.70
  12  -8   8    6.90   50.89
  12  -8   8   70.89   11.40
 -11   7  -8  228.28   32.80
 -11   7  -8  220.78   32.10
  11  -7   8  207.68   33.30
 -10   6  -8  261.57   35.70
 -10   6  -8  224.88   34.90
  -9   5  -8  180.68   24.50
  -9   5  -8  165.28   24.90
   9  -5   8  145.69   24.80
  -7   3  -8   26.60   14.00
   7  -3   8  -23.50   18.90
   7  -3   8    7.10    3.40
  -6   2  -8  224.98   32.30
  -6   2  -8  220.68   32.50
  -5   1  -8  446.16   64.39
  -4   0  -8   18.90    7.50
  -4   0  -8   24.60    4.50
  -4   0  -8   31.00    4.80
   4   0   8   31.50    4.70
  -3  -1  -8   45.00    8.20
  -3  -1  -8   50.59   10.80
  -3  -1  -8   58.79    8.30
   3   1   8   59.29    8.20
   3   1   8   62.49   10.90
  -2  -2  -8   59.19   10.10
  -2  -2  -8   64.39   12.20
  -2  -2  -8   79.29   10.20
   2   2   8   58.99   12.10
   2   2   8   70.29   10.20
  -1  -3  -8   68.29   11.00
  -1  -3  -8   78.59   11.00
  -1  -3  -8   76.89   13.70
   1   3   8   72.89   10.90
   0   4   8   54.79    8.00
   0   4   8   49.60    7.80
   1  -5  -8   45.80    7.50
   1  -5  -8   41.10   12.00
  -1   5   8   42.70    7.00
  -1   5   8   59.49   11.60
  -1   5   8   39.60    6.30
   2  -6  -8  798.72  129.69
   2  -6  -8  889.41  127.29
  -2   6   8  950.20  129.39
  -2   6   8  895.51  127.29
   3  -7  -8  626.94   94.89
   3  -7  -8  638.14   94.79
   3  -7  -8  717.93   95.29
   4  -8  -8  494.05   75.89
  -4   8   8  496.15   74.99
  -4   8   8  566.14   74.99
   5  -9  -8  188.78   29.10
  -5   9   8  176.78   27.10
  -5   9   8  238.38   38.50
   6 -10  -8   68.39   10.60
   6 -10  -8   69.29   11.10
   6 -10  -8   64.79   14.10
   6 -10  -8   99.29   15.20
  -6  10   8   17.50   49.60
  -6  10   8   78.19   13.60
  -6  10   8   14.30   29.90
   7 -11  -8   21.90   11.00
   7 -11  -8   29.70   11.20
   7 -11  -8   25.90    5.20
   7 -11  -8   37.60    6.20
  -7  11   8    6.10   31.80
   8 -12  -8   -1.20   11.40
   8 -12  -8    2.40    4.80
   8 -12  -8   -5.80    3.20
   8 -12  -8  -22.80   23.30
  -8  12   8   -5.90   10.10
  -8  12   8   -9.40   40.80
  -8  12   8    0.30    5.30
   9 -13  -8   -2.40   13.70
   9 -13  -8  -18.50   16.60
  -9  13   8   25.00   53.29
  -9  13   8   -7.70    6.50
  10 -14  -8    8.50   14.90
  10 -14  -8   -4.40   21.00
 -10  14   8  -70.39   67.29
 -10  14   8    4.60    7.30
  11 -15  -8   12.90   18.30
 -11  15   8    0.40    8.90
 -16  13  -7   14.70    9.90
  16 -13   7   -1.00   27.50
 -15  12  -7   16.90    8.10
  15 -12   7   12.50   22.50
 -14  11  -7   59.19   10.80
  14 -11   7   55.19   19.20
 -13  10  -7   86.29   12.90
 -13  10  -7   41.60   70.09
 -13  10  -7   51.89   70.99
 -13  10  -7   69.19   17.70
  13 -10   7   65.69   12.90
  13 -10   7  102.89   19.50
 -12   9  -7   28.00   51.29
 -12   9  -7   47.40    9.70
 -12   9  -7  118.19   62.09
 -12   9  -7   63.09   13.20
  12  -9   7   70.39   10.30
  12  -9   7   34.20   52.09
  -9   6  -7  190.38   26.90
  -9   6  -7  171.98   26.50
  -9   6  -7  187.28   27.40
  -8   5  -7  386.56   51.59
  -8   5  -7  364.86   51.99
  -8   5  -7  319.67   51.59
   8  -5   7  356.86   51.99
  -7   4  -7  455.95   68.09
  -7   4  -7  487.65   67.99
   6  -3   7   92.69   14.10
  -5   2  -7    9.30    9.70
  -5   2  -7   14.20    3.30
  -5   2  -7   14.10    2.60
  -5   2  -7    4.40    9.10
   5  -2   7    7.80   14.10
   5  -2   7    9.70    3.30
   5  -2   7   16.90    2.50
  -4   1  -7   36.30    5.80
  -4   1  -7   53.19    9.50
  -4   1  -7   31.70    5.30
   4  -1   7   34.10    5.70
   4  -1   7   38.60    5.30
  -3   0  -7    1.30   10.00
  -3   0  -7   -0.40    1.60
  -3   0  -7    2.00    1.30
  -3   0  -7    3.60    4.80
   3   0   7    0.50    5.70
   3   0   7   -1.50    1.30
   3   0   7   -6.30    8.60
   3   0   7    0.90    0.80
  -2  -1  -7    6.70    4.50
  -2  -1  -7    6.40    1.60
   2   1   7    7.90    1.70
   2   1   7    4.20    1.50
   2   1   7   -9.60   10.50
   2   1   7    3.20    4.10
  -1  -2  -7  280.67   41.60
   1   2   7  269.47   42.30
   1   2   7  310.97   41.60
   0  -3  -7  646.84  107.19
   0   3   7  787.92  106.39
   0   3   7  771.72  106.29
   2  -5  -7 1815.12  241.48
   2  -5  -7 1566.74  242.68
  -2   5   7 1685.13  241.18
  -2   5   7 1814.22  242.58
  -2   5   7 1694.13  241.18
  -2   5   7 1492.25  241.28
   3  -6  -7  892.81  122.59
   3  -6  -7  787.72  122.19
  -3   6   7  901.41  122.19
  -3   6   7  828.52  124.19
  -3   6   7  824.12  122.29
  -3   6   7  861.81  122.39
   4  -7  -7  300.97   44.40
   4  -7  -7  319.87   43.70
  -4   7   7  314.37   48.10
  -4   7   7  278.37   43.80
  -4   7   7  308.17   43.70
   5  -8  -7    1.80    2.00
   5  -8  -7    9.60    6.00
   5  -8  -7    3.80    1.60
   5  -8  -7   -0.70    6.80
  -5   8   7    8.60    5.00
  -5   8   7   13.10   36.70
  -5   8   7    5.30    2.40
  -5   8   7   -3.60   17.00
   6  -9  -7   71.89    9.80
   6  -9  -7   65.99   12.60
  -6   9   7   84.99   25.40
  -6   9   7   31.60   45.10
  -6   9   7   56.39   10.30
   7 -10  -7  -15.30    8.70
   7 -10  -7    0.40    2.20
   7 -10  -7   -3.00    3.30
  -7  10   7  -11.90   30.00
  -7  10   7   -0.60    7.30
  -7  10   7   11.50    3.70
  -7  10   7   -3.60   49.50
   8 -11  -7    7.00    4.60
   8 -11  -7   39.00   10.60
   8 -11  -7   16.50   10.90
   8 -11  -7   15.80    3.80
  -8  11   7   15.80   35.70
  -8  11   7   16.90    4.90
  -8  11   7   41.00    9.40
   9 -12  -7   17.20   14.90
   9 -12  -7   47.50    7.80
   9 -12  -7   48.40   13.20
  -9  12   7   58.89    9.50
  -9  12   7   33.00   13.00
  -9  12   7   52.69   47.00
  10 -13  -7   44.00   18.60
  10 -13  -7   49.30   14.00
 -10  13   7  116.89   60.19
 -10  13   7   29.10    8.40
  11 -14  -7   13.90   21.90
  11 -14  -7   39.80   16.20
 -11  14   7   23.40    9.00
 -11  14   7  130.09   77.59
  12 -15  -7   15.60   16.90
 -12  15   7   -6.80    8.80
  16 -14   6   46.50   29.60
 -15  13  -6    2.80    8.50
 -14  12  -6    8.90    6.70
  14 -12   6  -16.40   19.30
  13 -11   6   -1.30    7.40
  13 -11   6   57.69   16.40
 -12  10  -6   -6.30   53.89
  12 -10   6  -34.50   58.19
 -11   9  -6   15.30   46.90
 -11   9  -6   98.69   14.10
 -11   9  -6   83.39   16.50
  11  -9   6   -0.60   46.90
 -10   8  -6   85.89   13.70
 -10   8  -6  109.99   16.50
  -9   7  -6   20.60   33.80
  -9   7  -6   73.89   12.80
  -9   7  -6   67.99   10.50
   9  -7   6   76.69   12.70
   9  -7   6   15.70   34.20
  -8   6  -6    7.30    4.60
  -8   6  -6    9.00    2.50
  -8   6  -6   11.30    5.20
  -8   6  -6   27.20   27.60
   8  -6   6   18.90    5.40
   8  -6   6   28.20   31.40
  -7   5  -6   -1.60   24.00
  -7   5  -6   27.30    4.50
  -7   5  -6   37.80    5.30
  -7   5  -6   22.00    6.10
   7  -5   6  -25.20   20.60
   7  -5   6   13.10    5.70
  -6   4  -6   76.79   11.70
  -6   4  -6   75.59   12.20
   6  -4   6   80.59   12.20
  -5   3  -6  138.59   22.00
  -5   3  -6  154.78   21.70
   5  -3   6  153.58   22.00
  -4   2  -6  185.08   26.50
  -4   2  -6  141.49   22.40
  -4   2  -6  156.38   22.20
   3  -1   6  110.39   16.60
   3  -1   6  120.19   16.70
  -2   0  -6 2092.99  275.67
   2   0   6 1741.53  275.67
  -1  -1  -6 2084.29  283.07
  -1  -1  -6 2060.39  282.37
  -1  -1  -6 1732.83  282.27
   1   1   6 1983.10  282.77
   0  -2  -6 1206.98  177.58
   0   2   6 1269.07  176.98
   0   2   6 1215.98  177.08
   1  -3  -6  254.37   37.60
   1  -3  -6  237.38   38.60
  -1   3   6  276.67   37.60
  -1   3   6  267.27   38.50
   2  -4  -6   14.40    7.50
   2  -4  -6    5.60    2.30
   2  -4  -6    4.70    4.50
   2  -4  -6    1.10    0.80
  -2   4   6    3.50    1.30
  -2   4   6   -1.00    5.90
  -2   4   6   -1.70   21.00
  -2   4   6    2.50    1.70
   3  -5  -6   58.19    8.30
   3  -5  -6   53.89    9.70
   3  -5  -6   56.09    9.30
  -3   5   6   56.49    8.30
  -3   5   6   55.19    8.50
  -3   5   6   54.79   12.60
   4  -6  -6    8.80    1.90
   4  -6  -6    3.70    1.40
   4  -6  -6   -5.60    5.50
   4  -6  -6   17.20    4.30
  -4   6   6    5.00    1.50
  -4   6   6   19.70   26.10
  -4   6   6    9.60    1.90
  -4   6   6    4.90    3.50
  -4   6   6   -7.70   10.70
   5  -7  -6   22.80    4.60
   5  -7  -6   27.40    4.10
  -5   7   6   36.60    6.30
  -5   7   6    5.90   30.60
  -5   7   6   -1.40   14.40
   6  -8  -6   83.79   11.40
   6  -8  -6   67.59   13.40
   6  -8  -6   67.19   11.70
  -6   8   6   84.49   23.30
  -6   8   6   21.00   36.90
  -6   8   6   99.59   13.60
   7  -9  -6   30.10    8.60
   7  -9  -6   31.30    8.60
   7  -9  -6   22.30    4.10
  -7   9   6   12.30   22.70
  -7   9   6   27.90    4.90
  -7   9   6  -57.29   39.50
   8 -10  -6   55.69   11.20
   8 -10  -6   52.59    7.60
   8 -10  -6   37.00    8.10
   8 -10  -6   43.50   11.60
  -8  10   6  106.49   36.60
  -8  10   6   59.49   11.50
  -8  10   6    0.90   47.40
   9 -11  -6   16.80    9.90
   9 -11  -6   19.60    6.00
   9 -11  -6   36.30   12.20
  -9  11   6   30.60    5.50
  -9  11   6   11.30   10.30
  -9  11   6   46.60   40.80
  10 -12  -6    1.00    9.60
  10 -12  -6    2.20    3.60
  10 -12  -6    6.70    6.00
  10 -12  -6    9.20   13.30
 -10  12   6   -9.10   49.99
 -10  12   6    6.40    4.80
 -10  12   6    0.50   11.90
  11 -13  -6    7.60   18.40
  11 -13  -6   32.10   13.70
 -11  13   6   -3.40   62.59
 -11  13   6   17.80    6.60
  12 -14  -6   30.50   24.60
  12 -14  -6   26.20   14.80
 -12  14   6  -27.30   78.09
 -13  15   6   36.80   12.80
  15 -14   5   42.20   31.20
  14 -13   5   42.90   24.70
 -13  12  -5   56.39   10.50
  13 -12   5   56.69   21.70
 -12  11  -5  128.49   22.90
 -12  11  -5  112.69   18.30
  12 -11   5  122.79   24.40
  12 -11   5  106.99   18.10
  12 -11   5  141.39   19.70
 -11  10  -5   26.90   53.29
  11 -10   5  -12.60   50.89
  11 -10   5   31.20   12.10
 -10   9  -5   48.10    9.70
 -10   9  -5   19.40    4.40
 -10   9  -5  -10.80   40.30
  10  -9   5   20.20    4.80
  10  -9   5    8.90    9.20
  10  -9   5   -2.90   47.30
  -9   8  -5   19.50    4.00
  -9   8  -5   -3.40   33.90
  -9   8  -5   15.30    7.60
   9  -8   5   25.50    7.60
   9  -8   5   19.90    4.50
   9  -8   5  -16.30   37.90
  -8   7  -5    7.50    5.80
  -8   7  -5   20.30   32.30
  -8   7  -5   10.70    2.90
   8  -7   5   14.20    3.20
   8  -7   5   26.60   30.80
   7  -6   5  218.38   32.30
  -6   5  -5  728.53  107.29
  -6   5  -5  790.22  107.59
   6  -5   5  743.73  107.29
   6  -5   5  720.13  107.59
  -5   4  -5  853.41  126.99
   5  -4   5  955.50  126.99
   5  -4   5  836.52  127.19
  -4   3  -5  768.42  105.99
   4  -3   5  653.93  105.89
   4  -3   5  782.02  105.79
   3  -2   5  198.98   26.10
   3  -2   5  159.98   26.20
  -2   1  -5   45.70    5.90
  -2   1  -5   34.10    5.50
   2  -1   5   37.10    5.50
   2  -1   5   39.20    5.70
  -1   0  -5    0.40    2.90
  -1   0  -5    2.90    1.10
  -1   0  -5   -2.70    7.10
  -1   0  -5    0.80    0.90
   1   0   5    1.40    0.90
   1   0   5    3.20    3.10
   1   0   5    2.90    5.50
   1   0   5    0.60    0.80
   0  -1  -5  334.97   50.89
   0  -1  -5  377.46   51.29
   0   1   5  376.66   50.89
   0   1   5  326.67   51.19
   1  -2  -5 1539.25  235.38
  -1   2   5 1735.33  235.38
   2  -3  -5    7.30    5.30
   2  -3  -5   12.90    2.30
   2  -3  -5    6.50    3.60
  -2   3   5   10.10    4.30
  -2   3   5    8.70    1.90
  -2   3   5    5.20    1.20
  -2   3   5    8.70    1.50
   3  -4  -5   16.20    2.50
   3  -4  -5   15.40    2.30
   3  -4  -5   10.40    4.30
  -3   4   5   17.30   14.30
  -3   4   5   12.80   15.60
  -3   4   5   11.70    2.40
  -3   4   5   26.00    7.60
  -3   4   5   17.80    2.70
   4  -5  -5    4.30    1.70
   4  -5  -5   11.70    5.30
   4  -5  -5    7.50    1.40
   4  -5  -5   12.60    3.80
  -4   5   5    0.10    9.30
  -4   5   5    9.70    1.80
  -4   5   5    7.40    3.00
  -4   5   5   -6.80   19.10
   5  -6  -5   91.09   13.00
   5  -6  -5   69.19   12.90
  -5   6   5   96.39   19.60
   6  -7  -5    7.90    5.30
   6  -7  -5   17.00    2.60
   6  -7  -5   15.30    6.10
  -6   7   5  -41.10   29.30
  -6   7   5    7.30   15.40
   7  -8  -5   36.30    7.60
   7  -8  -5   22.90    4.10
   7  -8  -5   24.40    4.70
  -7   8   5   38.00    7.00
  -7   8   5    9.50   32.00
  -7   8   5   67.99   21.80
   8  -9  -5  284.27   39.30
   8  -9  -5  247.58   37.50
   9 -10  -5  168.38   32.40
   9 -10  -5  217.98   30.80
  -9  10   5  237.18   32.40
  10 -11  -5  213.78   30.80
  10 -11  -5  169.18   33.90
  10 -11  -5  230.68   32.40
  10 -11  -5  204.28   30.30
 -10  11   5  206.28   54.19
  11 -12  -5   80.89   24.60
  11 -12  -5  128.99   22.40
  11 -12  -5  112.09   19.50
 -11  12   5   42.10   57.39
 -11  12   5  146.99   19.30
  12 -13  -5   45.60   21.40
  12 -13  -5   17.10   14.00
 -12  13   5   30.70   66.29
 -12  13   5   35.30    8.10
  13 -14  -5   11.00   13.90
  13 -14  -5   19.00   23.10
 -13  14   5   -5.60    7.40
 -13  14   5   12.70   92.19
  14 -14   4   39.10   27.00
 -13  13  -4    1.40    6.80
  13 -13   4   21.20   20.30
 -12  12  -4  -23.00   67.99
 -12  12  -4   -4.90    5.60
  12 -12   4    3.60   17.80
  12 -12   4   -5.00    9.20
 -11  11  -4   -2.70   13.40
 -11  11  -4    7.00    4.40
  11 -11   4   13.40   14.80
  11 -11   4    9.10    6.40
  11 -11   4   11.40    4.00
  11 -11   4   -2.20    6.70
 -10  10  -4   22.20   54.29
 -10  10  -4   11.20    4.20
 -10  10  -4    6.50   10.00
  10 -10   4   16.30   56.99
  10 -10   4    6.30    5.60
  10 -10   4   17.50    3.90
  10 -10   4   15.50    6.20
  10 -10   4    2.10   11.10
  -9   9  -4  103.09   20.20
  -9   9  -4  125.39   17.90
   9  -9   4  115.19   20.30
   9  -9   4  124.49   18.70
  -8   8  -4  178.78   23.20
   8  -8   4  141.99   24.50
   8  -8   4  142.39   23.60
   7  -7   4  409.96   57.69
   7  -7   4  384.56   58.09
   6  -6   4  529.25   76.29
   5  -5   4  552.04   79.79
  -4   4  -4  163.68   22.50
  -4   4  -4  135.89   23.00
   4  -4   4  161.08   22.60
  -3   3  -4   11.90    3.00
  -3   3  -4   11.50    2.20
  -3   3  -4   12.70    2.40
  -3   3  -4   -3.40   14.90
   3  -3   4   17.20    3.00
   3  -3   4   -4.40   11.30
   3  -3   4   13.70    2.20
  -2   2  -4  299.47   41.00
  -2   2  -4  260.27   40.90
   2  -2   4  290.77   41.00
   2  -2   4  287.07   40.90
   1  -1   4   79.39   11.60
   1  -1  -4  114.89   16.40
   1  -1  -4  107.19   16.00
   1  -1  -4  103.89   16.00
   1  -1  -4  120.69   16.40
  -1   1   4  113.19   16.00
   2  -2  -4  169.58   23.70
   2  -2  -4  141.89   24.40
   2  -2  -4  182.48   23.60
  -2   2   4  170.58   24.30
  -2   2   4  146.79   24.00
   3  -3  -4    1.60    0.50
   3  -3  -4    1.50    1.70
   3  -3  -4    2.80    0.80
   3  -3  -4    6.40    2.60
   3  -3  -4  -13.50   13.90
  -3   3   4   10.70   11.90
  -3   3   4    4.00    1.50
  -3   3   4    0.50    0.60
  -3   3   4    4.70   11.40
  -3   3   4    1.90    4.70
   4  -4  -4   42.40    8.50
   4  -4  -4   48.80    7.50
  -4   4   4   57.89   11.50
  -4   4   4   54.99    7.50
  -4   4   4   47.90    7.50
  -4   4   4   41.40    8.70
  -4   4   4   65.69    8.00
   5  -5  -4   36.30    6.70
   5  -5  -4   39.60    7.00
   5  -5  -4   41.70    5.60
  -5   5   4   17.60   22.80
  -5   5   4   32.30    5.60
  -5   5   4   35.00   12.30
   6  -6  -4  348.07   55.49
   6  -6  -4  406.06   54.89
  -6   6   4  385.26   55.39
   7  -7  -4  244.48   41.20
   7  -7  -4  308.37   41.10
  -7   7   4  283.37   40.90
   8  -8  -4  418.86   63.79
  -8   8   4  440.46   63.89
  -8   8   4  533.05   72.49
   9  -9  -4  229.98   36.70
   9  -9  -4  262.67   35.60
  -9   9   4  197.08   48.80
  10 -10  -4   75.39   15.50
  10 -10  -4   66.59   10.20
  10 -10  -4   67.79   12.90
 -10  10   4   94.89   38.90
 -10  10   4   -1.40   48.10
  11 -11  -4    8.40    8.60
  11 -11  -4    2.30   12.80
  11 -11  -4   16.40    5.70
  11 -11  -4    7.70    3.50
 -11  11   4   -2.90   46.70
 -11  11   4    3.10   11.40
  12 -12  -4    5.50   16.90
  12 -12  -4   -6.10    9.80
  12 -12  -4   -3.30    6.30
 -12  12   4  -10.30    4.80
 -12  12   4  -39.70   57.69
  13 -13  -4   -7.80   12.10
  13 -13  -4    3.30   21.00
 -13  13   4   13.10   68.99
 -13  13   4  -14.60    6.10
  14 -14  -4   11.70   27.20
 -14  14   4  -81.69   92.29
  14 -15   3   30.30   29.60
 -13  14  -3   -0.70    8.00
  13 -14   3    4.60   30.80
  12 -13   3   27.90   20.50
 -11  12  -3  -70.59   63.89
 -11  12  -3   -4.30    4.90
  11 -12   3   -2.00    8.60
  11 -12   3   23.70   15.60
  11 -12   3    7.50    4.60
 -10  11  -3   84.19   13.50
 -10  11  -3  109.09   53.19
 -10  11  -3  101.69   17.50
 -10  11  -3  -30.30   59.79
  10 -11   3   71.99   18.70
  -9  10  -3  149.09   20.40
   9 -10   3  137.49   21.10
   9 -10   3  125.29   23.20
   9 -10   3  127.99   20.30
  -8   9  -3    2.00   41.80
  -8   9  -3   77.99   12.00
   8  -9   3   21.30   36.20
   8  -9   3   33.30   40.00
   8  -9   3   94.69   12.00
   8  -9   3   74.69   13.10
   8  -9   3   73.19   14.20
  -7   8  -3   23.30    8.00
  -7   8  -3   34.80    5.50
  -7   8  -3  -11.00   31.80
   7  -8   3   29.60    7.70
   7  -8   3   27.50    6.40
   7  -8   3   43.20    6.50
  -6   7  -3  111.69   17.80
  -6   7  -3   35.90   35.10
   6  -7   3  119.69   17.00
   6  -7   3  113.59   17.60
   5  -6   3  257.07   34.60
   5  -6   3  218.98   34.20
  -4   5  -3  457.45   67.99
   4  -5   3  490.45   67.79
   4  -5   3  460.55   67.99
  -3   4  -3 1278.57  175.98
   3  -4   3 1166.78  175.98
  -2   3  -3   34.50    5.50
   2  -3   3    9.80   14.50
   2  -3   3   34.60    5.40
   1  -2   3   38.50    5.80
   1  -2   3   41.00    5.80
   0  -1   3    7.10    4.70
   0  -1   3   10.20    1.50
   1   0  -3    1.80    0.80
   1   0  -3    1.50    2.60
   1   0  -3    8.60   10.00
  -1   0   3    0.80    2.50
  -1   0   3    0.70    0.70
  -1   0   3    0.00    0.50
  -2   1   3  349.57   50.29
   3  -2  -3  441.46   69.59
  -3   2   3  529.95   69.79
   4  -3  -3  844.32  114.19
   4  -3  -3  798.52  114.49
  -4   3   3  737.23  114.49
  -5   4   3  966.00  138.19
  -5   4   3  955.70  138.49
   6  -5  -3 1030.10  148.09
   7  -6  -3  486.85   63.59
   7  -6  -3  411.16   64.09
   7  -6  -3  411.16   63.69
   7  -6  -3  416.86   64.09
  -7   6   3  481.95   64.39
   8  -7  -3   77.19   12.40
   8  -7  -3   73.29   11.50
  -8   7   3   65.19   10.30
   9  -8  -3    0.60    5.80
   9  -8  -3    1.80    3.10
   9  -8  -3   18.20   27.90
   9  -8  -3    1.90    1.90
   9  -8  -3   10.60    6.80
  -9   8   3    5.70    2.40
  -9   8   3  -27.80   30.40
  -9   8   3    5.70    5.90
  10  -9  -3   76.79   10.60
  10  -9  -3   63.89   11.90
  10  -9  -3   50.39    9.50
 -10   9   3   49.20   12.10
 -10   9   3  137.19   36.10
 -10   9   3   22.10   43.90
 -10   9   3   66.59    9.70
  11 -10  -3   10.40   12.20
  11 -10  -3   23.10    6.40
  11 -10  -3   31.80    5.20
 -11  10   3   19.40   40.10
 -11  10   3   31.60    5.70
 -11  10   3   24.00   10.20
  12 -11  -3    4.90    3.70
  12 -11  -3   12.90    8.50
  12 -11  -3    2.70    5.70
  12 -11  -3   -2.30   14.80
 -12  11   3  -35.40   49.30
 -12  11   3    1.40   12.60
 -12  11   3    9.30    4.40
  13 -12  -3   41.30   17.30
  13 -12  -3   35.40   12.00
  13 -12  -3   24.60   11.40
 -13  12   3   54.39   60.19
 -13  12   3   24.60    6.80
  14 -13  -3   27.40   11.70
  14 -13  -3    3.20   22.90
 -14  13   3   17.30    7.90
  15 -14  -3   45.90   29.70
  13 -15   2   33.80   32.10
 -12  14  -2   13.00    7.90
  12 -14   2   21.60   22.90
 -11  13  -2   -5.90   75.29
  11 -13   2  -10.10   20.00
 -10  12  -2   40.50   58.49
 -10  12  -2    0.90   15.20
 -10  12  -2    0.60    4.60
  10 -12   2    3.60    7.80
  10 -12   2   21.10    7.80
  10 -12   2   -5.00   13.40
  10 -12   2   -4.50    4.00
  -9  11  -2   54.89    9.60
  -9  11  -2   41.30   52.59
  -9  11  -2   75.69   16.90
  -9  11  -2   48.30   46.70
   9 -11   2   64.79    9.30
   9 -11   2   50.59   14.70
   9 -11   2   47.50   10.70
   9 -11   2   53.09   10.60
  -8  10  -2  313.97   58.99
  -8  10  -2  281.77   39.70
  -8  10  -2  297.67   41.30
   8 -10   2  254.07   41.10
   8 -10   2  251.67   40.10
  -7   9  -2  296.07   44.50
   7  -9   2  321.97   45.00
   6  -8   2  373.96   54.19
  -5   7  -2  130.19   17.00
   5  -7   2  101.29   15.60
   5  -7   2  100.19   16.60
  -4   6  -2  144.39   22.20
   4  -6   2  151.68   22.10
  -3   5  -2   22.90   18.00
  -3   5  -2    5.30    1.30
   3  -5   2    1.40    2.30
   3  -5   2    4.70    1.60
   3  -5   2   -1.00   22.20
   3  -5   2    9.00    3.00
   3  -5   2    0.40   20.50
  -2   4  -2  104.99   15.20
   2  -4   2   91.59   15.50
   2  -4   2  113.49   15.50
   2  -4   2  123.49   21.20
  -1   3  -2  282.27   43.40
   1  -3   2  321.37   43.40
   0   2  -2  443.86   63.89
   3  -1  -2 1047.30  140.19
   3  -1  -2  981.10  140.29
  -3   1   2  896.11  140.19
   4  -2  -2 6319.37  907.91
   4  -2  -2 6368.06  908.11
  -4   2   2 6264.67  908.11
   5  -3  -2   23.70    4.70
   5  -3  -2   24.30    3.90
   5  -3  -2   25.80    4.00
  -5   3   2   29.50    4.00
  -5   3   2   31.60    4.50
  -5   3   2   23.60    4.80
   6  -4  -2  220.58   30.60
   6  -4  -2  197.98   30.50
  -6   4   2  209.28   30.20
   7  -5  -2  211.58   33.50
   7  -5  -2  238.18   33.00
  -7   5   2  213.68   33.10
  -7   5   2  260.07   33.80
   8  -6  -2   14.10   22.50
   8  -6  -2   41.00    7.20
   8  -6  -2   30.40    7.50
   8  -6  -2   31.40    5.70
  -8   6   2   48.70    7.50
  -8   6   2   47.40    8.40
  -8   6   2   40.70    5.90
   9  -7  -2   19.00    5.30
   9  -7  -2   29.30    6.70
   9  -7  -2  -19.60   29.70
   9  -7  -2  -15.90   24.00
  -9   7   2   13.70    3.10
  -9   7   2   36.60   27.30
  -9   7   2   14.40    8.30
  10  -8  -2   25.20   29.10
  10  -8  -2   60.49   11.10
  10  -8  -2   25.40   34.90
  10  -8  -2   46.30    7.50
  10  -8  -2   40.00    9.10
 -10   8   2   50.79    7.80
 -10   8   2   35.40   33.70
 -10   8   2   59.09   10.00
  11  -9  -2   50.39   10.50
  11  -9  -2   34.40   40.00
  11  -9  -2   64.59    9.40
  11  -9  -2   50.69   13.50
 -11   9   2    2.20   42.90
 -11   9   2   68.39    9.80
 -11   9   2   58.89   12.40
  12 -10  -2   33.40    9.60
  12 -10  -2   43.40   14.50
  12 -10  -2   47.60    7.30
  12 -10  -2   44.60    8.30
 -12  10   2   51.69   12.40
 -12  10   2   40.90   51.69
 -12  10   2   44.70   44.50
 -12  10   2   36.80    7.40
  13 -11  -2   -0.80    3.90
  13 -11  -2    8.50    6.50
  13 -11  -2   -9.60   16.30
 -13  11   2   -0.20   12.10
 -13  11   2  -34.20   50.49
 -13  11   2   14.60    4.90
  14 -12  -2   -0.10    9.10
  14 -12  -2    8.00   11.00
  14 -12  -2   10.80   20.60
 -14  12   2   13.50   63.49
 -14  12   2   -2.30    5.90
  15 -13  -2   64.89   25.10
 -15  13   2  -14.00   85.19
 -15  13   2    8.30    7.90
  16 -14  -2   45.40   31.40
 -16  14   2   29.00   10.30
  12 -15   1    8.20   28.60
  11 -14   1    3.50   23.40
 -10  13  -1   84.29   15.20
 -10  13  -1   82.19   66.49
  10 -13   1   88.39   21.70
  10 -13   1   81.49   21.40
  -9  12  -1  169.18   24.50
  -9  12  -1  226.58   64.19
  -9  12  -1  123.29   27.80
   9 -12   1  152.58   29.20
   9 -12   1  182.08   26.10
   9 -12   1  173.48   24.20
   9 -12   1  143.79   25.70
  -8  11  -1  249.48   38.40
  -8  11  -1  268.07   60.89
  -8  11  -1  262.67   36.30
   8 -11   1  219.18   37.00
   8 -11   1  253.97   36.10
  -7  10  -1  150.88   26.70
   7 -10   1  186.58   24.50
   7 -10   1  151.18   25.30
  -6   9  -1  135.69   17.70
  -6   9  -1  146.99   19.70
   6  -9   1  104.69   17.50
   6  -9   1  108.29   19.30
   6  -9   1  109.99   18.40
  -5   8  -1    8.30    2.40
  -5   8  -1   10.90   21.80
  -5   8  -1    5.80    6.20
  -5   8  -1  -25.20   32.20
   5  -8   1   10.20    5.30
   5  -8   1   11.50   11.30
   5  -8   1    7.70    4.20
  -4   7  -1   46.50    6.90
  -4   7  -1  -25.50   31.10
  -4   7  -1   22.90   18.60
  -3   6  -1   32.90   14.60
  -3   6  -1   22.40    4.90
   3  -6   1  -17.00   17.90
   3  -6   1   12.50    3.00
   3  -6   1   16.40    4.20
   3  -6   1   16.50    2.60
  -2   5  -1  447.06   64.39
  -1   4  -1 3113.69  458.55
   1  -4   1 3264.97  458.55
   0   3  -1 3167.88  455.35
   1   2  -1  107.99   16.80
   1   2  -1  102.59   16.10
  -1  -2   1  118.79   15.90
   2   1  -1  151.88   21.90
   3   0  -1    0.40    0.20
   3   0  -1   -1.10    1.90
   3   0  -1    0.40    0.40
  -3   0   1   -0.10    0.20
  -3   0   1    0.00    1.50
  -3   0   1    0.50    0.50
   4  -1  -1  924.51  121.49
  -4   1   1  800.42  121.59
  -4   1   1  808.42  121.49
   5  -2  -1  395.16   56.29
  -5   2   1  386.16   56.39
   6  -3  -1  193.48   27.60
  -6   3   1  189.08   27.80
   7  -4  -1   10.00   18.60
   7  -4  -1   20.20    4.20
  -7   4   1   15.60    4.30
  -7   4   1   -0.80   15.30
  -7   4   1   25.60    4.00
  -7   4   1   14.80    2.80
   8  -5  -1   -9.90   22.50
   8  -5  -1    2.50    3.90
   8  -5  -1   -7.20    3.30
   8  -5  -1    1.50    1.60
  -8   5   1  -15.20   18.10
  -8   5   1    3.80    3.50
  -8   5   1    2.70    1.30
  -8   5   1    3.80    4.70
   9  -6  -1  215.18   34.30
  -9   6   1  247.88   34.20
  10  -7  -1   70.29   10.20
  10  -7  -1    6.60   32.50
  10  -7  -1   63.49   11.60
 -10   7   1   35.60   30.30
 -10   7   1   62.59   12.10
 -10   7   1   72.89   13.40
 -10   7   1   71.99   10.30
  11  -8  -1   -0.50    5.00
  11  -8  -1    7.70    2.30
  11  -8  -1   10.30   36.10
  11  -8  -1    4.20    3.50
  11  -8  -1    7.60    7.80
 -11   8   1   -1.00    6.60
 -11   8   1   -5.90   10.30
 -11   8   1   -0.20    2.40
 -11   8   1   19.60   36.90
  12  -9  -1  170.38   27.60
  12  -9  -1  164.68   24.20
 -12   9   1  133.99   26.10
 -12   9   1  177.18   24.30
  13 -10  -1  204.08   41.60
  13 -10  -1  233.88   39.00
 -13  10   1  292.77   37.80
  14 -11  -1  216.28   29.80
  14 -11  -1  193.48   34.70
 -14  11   1  182.78   33.80
 -14  11   1  139.59   62.89
 -14  11   1  183.48   28.80
  15 -12  -1   41.40   22.60
  15 -12  -1   68.39   15.50
 -15  12   1  147.89   73.09
 -15  12   1   71.39   13.00
  16 -13  -1   16.50   24.60
 -16  13   1    8.90   90.69
 -16  13   1   32.00    9.10
  12 -16   0   51.39   35.90
 -11  15   0   80.09   15.00
 -10  14   0   71.99   13.00
  10 -14   0   80.79   23.20
  -9  13   0   47.90   66.39
  -9  13   0   32.60    7.10
   9 -13   0   34.30    9.60
   9 -13   0   19.50   10.70
   9 -13   0    8.40   16.50
  -8  12   0   -2.60    4.20
  -8  12   0   -0.20   11.30
  -8  12   0  -40.70   47.90
   8 -12   0   -6.40   11.50
   8 -12   0   10.60   12.60
   8 -12   0    8.60    3.60
   8 -12   0   -3.50    7.50
  -7  11   0   37.90   10.10
  -7  11   0   20.20    4.60
  -7  11   0   15.60   37.90
  -7  11   0  -10.10   55.69
   7 -11   0   11.70    6.60
   7 -11   0    8.30    7.30
   7 -11   0   27.90    4.60
  -6  10   0   35.80   44.10
  -6  10   0    9.00    3.50
  -6  10   0   17.40   31.90
  -6  10   0   20.80    8.80
   6 -10   0   -4.30    8.00
   6 -10   0   14.80    5.80
   6 -10   0   15.50    3.20
   6 -10   0   24.90    5.00
  -5   9   0   -1.00   25.40
  -5   9   0   22.60   40.00
  -5   9   0    2.10    6.60
  -5   9   0    6.80    2.50
   5  -9   0    3.40    3.50
   5  -9   0   -1.40    5.70
   5  -9   0    3.00    2.00
   5  -9   0   -0.80    4.90
  -4   8   0   62.79   23.80
   4  -8   0   75.39   11.10
   4  -8   0   69.29   10.70
   4  -8   0   68.39   12.20
   4  -8   0   79.89   12.20
  -3   7   0  312.27   50.19
  -3   7   0  372.86   55.49
  -3   7   0  342.57   50.69
   3  -7   0  387.36   50.69
  -2   6   0  325.47   55.39
  -2   6   0  384.56   51.19
  -2   6   0  344.57   50.79
   2  -6   0  350.36   50.79
   2  -6   0  346.37   50.79
  -1   5   0  454.15   72.79
   1  -5   0  479.75   70.89
   1  -5   0  525.55   70.59
   0   4   0  199.28   29.90
   0   4   0  226.38   29.70
   0  -4   0  193.18   29.80
   0  -4   0  203.48   29.60
   0  -4   0  203.78   29.70
   1   3   0  200.48   29.20
   1   3   0  215.18   29.10
   1   3   0  191.48   30.40
  -1  -3   0  198.08   29.10
   2   2   0 2505.95  360.16
   4   0   0   33.90    4.70
  -4   0   0   30.30    4.70
   5  -1   0 1243.88  176.58
  -5   1   0 1211.08  176.58
   6  -2   0   23.10    4.50
   6  -2   0   26.30    4.10
  -6   2   0   29.30    4.60
  -6   2   0   28.60    4.10
  -6   2   0   30.80    5.00
   7  -3   0   88.79   12.90
   8  -4   0    0.40    3.20
   8  -4   0    3.90    3.50
   8  -4   0    3.00   16.80
   8  -4   0    3.50    1.60
  -8   4   0    1.40    1.30
  -8   4   0   -5.30    4.00
  -8   4   0    7.70    3.10
  -8   4   0   18.50   16.60
   9  -5   0    4.40   23.30
   9  -5   0   58.39    9.70
   9  -5   0   53.89    8.60
  -9   5   0   45.60    9.80
  -9   5   0   52.59    9.60
  -9   5   0   18.40   23.20
  -9   5   0   61.79    8.30
  10  -6   0  252.37   39.50
 -10   6   0  303.07   39.90
 -10   6   0  262.07   39.00
  11  -7   0  349.96   44.60
  11  -7   0  273.37   44.10
 -11   7   0  296.07   44.30
 -11   7   0  295.67   43.50
  12  -8   0  328.17   53.09
  12  -8   0  324.97   52.19
 -12   8   0  381.16   51.69
 -12   8   0  361.96   52.59
 -12   8   0  389.16   53.59
  13  -9   0  145.59   22.00
  13  -9   0  115.99   23.40
  13  -9   0  150.88   20.30
 -13   9   0  128.29   20.40
  14 -10   0   43.50   10.70
  14 -10   0   41.40    7.30
  14 -10   0   23.40   15.80
 -14  10   0   40.00   13.00
 -14  10   0   47.40    8.30
  15 -11   0    4.90   17.30
  15 -11   0   -3.40   10.20
 -15  11   0    7.80    5.60
  16 -12   0  -20.00   22.70
  16 -12   0   17.00   11.80
 -16  12   0   -4.80    6.30
 -16  12   0  -25.40   75.79
  17 -13   0    1.60   28.10
 -17  13   0   57.49   98.69
 -17  13   0   -5.70    8.20
  11 -16  -1  -14.10   33.00
  10 -15  -1   11.10   24.70
  -9  14   1   53.89   78.09
  -8  13   1   10.20    5.80
  -8  13   1   43.70   60.69
   8 -13  -1    6.00    4.70
   8 -13  -1   26.40    8.70
   8 -13  -1   18.00   10.30
   8 -13  -1   13.30   15.90
  -7  12   1   -5.30    3.90
  -7  12   1   14.40   42.50
  -7  12   1   -4.00    9.60
   7 -12  -1   -7.10   11.20
   7 -12  -1    0.50    8.80
   7 -12  -1   -2.50    6.00
  -6  11   1   29.70    5.40
  -6  11   1   29.80   50.99
  -6  11   1    3.20   35.70
   6 -11  -1   21.10    4.60
   6 -11  -1   30.60    7.90
   6 -11  -1   20.60   10.10
  -5  10   1   98.29   18.50
  -5  10   1  152.58   37.30
  -5  10   1   56.59   50.69
   5 -10  -1  124.69   18.10
   5 -10  -1   96.39   18.40
   5 -10  -1  109.19   16.00
  -4   9   1  228.38   37.90
  -4   9   1  284.87   38.90
  -4   9   1  271.97   49.60
   4  -9  -1  234.18   38.70
   4  -9  -1  292.47   37.80
   4  -9  -1  268.97   38.70
  -3   8   1   72.29   20.20
  -3   8   1    9.60   37.40
   3  -8  -1   61.69    9.10
   3  -8  -1   41.40    6.80
  -2   7   1  112.79   23.10
  -2   7   1   -4.00   49.00
   2  -7  -1  111.19   16.00
   2  -7  -1  114.19   16.80
   2  -7  -1   99.99   16.20
   2  -7  -1  127.89   17.20
   1  -6  -1 1309.47  187.28
   1  -6  -1 1391.36  187.08
   1  -6  -1 1203.28  186.98
   1   4   1 7975.80 1101.09
   1   4   1 8353.66 1100.99
  -1  -4  -1 7100.79 1100.99
  -1  -4  -1 7447.25 1101.09
  -1  -4  -1 7425.16 1101.09
   2   3   1 2666.33  375.66
  -2  -3  -1 2559.64  375.76
   4   1   1  635.24   91.39
  -4  -1  -1  600.34   90.89
  -4  -1  -1  662.53   91.39
   5   0   1   -0.90    4.00
   5   0   1    1.30    0.60
  -5   0  -1    0.20    1.20
  -5   0  -1    0.20    0.60
  -5   0  -1    3.80    3.60
   6  -1   1   -0.50    1.30
   6  -1   1    0.70    0.70
   6  -1   1   -2.60    6.30
  -6   1  -1    0.90    0.70
  -6   1  -1    4.50    5.50
  -6   1  -1    2.50    1.50
   7  -2   1  200.78   29.70
  -7   2  -1  195.78   29.80
  -7   2  -1  215.58   29.50
  -7   2  -1  204.18   29.70
   8  -3   1  565.84   78.09
  -8   3  -1  547.65   78.29
  -8   3  -1  511.25   78.29
  -9   4  -1 1007.50  161.98
  -9   4  -1 1237.58  161.78
  10  -5   1  847.92  128.89
 -10   5  -1  887.91  128.89
 -10   5  -1  940.81  128.59
  11  -6   1  150.78   22.10
  12  -7   1   82.79   14.70
  12  -7   1   85.89   16.10
 -12   7  -1  101.29   13.80
 -12   7  -1  108.29   16.40
 -12   7  -1   78.69   15.50
 -12   7  -1   10.50   36.20
  13  -8   1   -7.00    9.10
  13  -8   1   16.60    4.60
  13  -8   1   21.60   41.80
 -13   8  -1   11.70    8.00
 -13   8  -1   30.60   10.70
 -13   8  -1  -21.10   39.50
 -13   8  -1   12.70    3.60
  14  -9   1   10.70   12.30
  14  -9   1  -34.10   54.19
 -14   9  -1  -19.20   46.30
 -14   9  -1   39.50   11.20
  15 -10   1   -4.10   14.40
  15 -10   1   16.50    6.50
  15 -10   1   16.20    4.60
 -15  10  -1   -4.30   12.40
 -15  10  -1   12.20    4.70
  16 -11   1   -4.10   20.40
  16 -11   1   -8.20    8.30
 -16  11  -1    1.90    5.50
  17 -12   1   -1.60   21.80
 -17  12  -1    4.10    7.10
  18 -13   1   74.19   32.90
  10 -16  -2    3.30   28.70
  -9  15   2    8.90    8.80
   9 -15  -2  -11.00   22.00
  -8  14   2   88.19   74.39
  -8  14   2   10.20    6.40
   8 -14  -2   -1.40   18.00
   8 -14  -2   16.50   11.80
  -7  13   2   42.90   53.99
   7 -13  -2   45.80   11.50
   7 -13  -2   27.30    8.60
   7 -13  -2   16.10   15.90
   7 -13  -2   22.40    5.50
  -6  12   2   -0.20    4.10
  -6  12   2    5.40    9.80
  -6  12   2  -30.90   44.90
   6 -12  -2   -1.20   10.90
   6 -12  -2   -3.20    2.90
   6 -12  -2    8.70    5.60
   6 -12  -2    8.70    8.70
  -5  11   2  -44.50   51.89
  -5  11   2   16.90    8.90
  -5  11   2   59.59   36.90
   5 -11  -2   30.60    8.80
   5 -11  -2   34.90    9.90
  -4  10   2  257.47   44.40
  -4  10   2  239.48   30.50
   4 -10  -2  206.18   30.60
   4 -10  -2  182.08   28.90
   4 -10  -2  177.08   30.50
   3  -9  -2  263.07   38.20
  -2   8   2  483.85   81.39
  -2   8   2  597.04   76.69
   2  -8  -2  491.55   77.09
   2  -8  -2  495.05   76.69
   2  -8  -2  568.94   77.29
  -1   7   2  359.76   55.89
  -1   7   2  337.27   51.59
   1  -7  -2  339.97   51.49
   1  -7  -2  397.56   51.69
   0   6   2  164.48   24.50
   0  -6  -2  190.78   25.10
   0  -6  -2  137.89   28.80
   1   5   2   36.50    5.20
   1   5   2   45.40    6.20
   1   5   2   29.20   10.80
  -1  -5  -2   30.50    5.10
  -1  -5  -2   58.29   11.20
   2   4   2   76.69   10.80
   2   4   2   71.99   11.20
   2   4   2   63.29   13.80
  -2  -4  -2   85.49   15.10
   3   3   2   94.59   17.70
   3   3   2  119.99   16.10
   3   3   2  114.19   16.00
  -3  -3  -2   96.39   17.60
   4   2   2  328.77   49.80
   4   2   2  366.26   50.59
  -4  -2  -2  344.97   49.80
   5   1   2   92.89   12.20
  -5  -1  -2   74.89   12.20
  -5  -1  -2   98.59   13.90
  -5  -1  -2   77.39   12.20
   6   0   2 6095.09  828.82
  -6   0  -2 5431.36  827.92
   7  -1   2 1828.22  262.97
   8  -2   2 1524.75  232.68
  -8   2  -2 1710.03  232.68
   9  -3   2  105.49   15.10
  -9   3  -2  114.99   15.90
  -9   3  -2  108.69   22.10
  -9   3  -2   95.39   15.20
  10  -4   2   15.20    4.40
  10  -4   2   17.40   21.00
  10  -4   2    8.30    2.40
 -10   4  -2   13.50    4.30
 -10   4  -2   25.40    6.00
 -10   4  -2   -5.10   16.90
  11  -5   2  136.39   24.70
  11  -5   2  177.48   23.80
  12  -6   2  147.39   24.90
 -12   6  -2  171.38   24.80
 -12   6  -2  164.48   23.70
  13  -7   2    7.40    8.70
  13  -7   2   -8.90   38.30
 -13   7  -2   16.00    3.70
 -13   7  -2    3.40   30.60
 -13   7  -2   20.60    9.10
 -13   7  -2   22.70    7.50
  14  -8   2   -0.30    9.60
  14  -8   2   -0.70    3.80
  14  -8   2   -9.90   49.30
 -14   8  -2  -17.20   38.20
 -14   8  -2   -3.80    3.20
 -14   8  -2   -7.90    7.80
  15  -9   2   30.30    5.10
  15  -9   2   36.40   15.20
  15  -9   2   18.20    6.10
 -15   9  -2   19.60    5.30
  16 -10   2   45.00    7.80
  16 -10   2   53.59   19.90
 -16  10  -2   28.60   14.20
 -16  10  -2   36.10    7.80
  17 -11   2    4.30    8.60
  17 -11   2   -1.80   19.30
 -17  11  -2    2.90    6.20
  18 -12   2  -11.90   26.20
 -18  12  -2  -13.80    7.20
  19 -13   2   34.40   35.40
   9 -16  -3   -1.20   26.20
  -8  15   3   -6.60    7.30
   8 -15  -3    4.90   23.30
  -7  14   3   33.40   65.09
  -7  14   3    5.50    6.10
   7 -14  -3    7.30   11.90
   7 -14  -3    0.20   18.00
  -6  13   3   95.99   56.79
  -6  13   3  102.59   16.20
   6 -13  -3   87.59   15.30
   6 -13  -3  109.69   21.10
   6 -13  -3   88.39   18.20
   6 -13  -3  121.79   17.00
  -5  12   3  201.28   51.99
  -5  12   3  193.78   29.50
   5 -12  -3  169.68   26.20
   5 -12  -3  191.08   29.50
  -4  11   3  374.26   76.99
  -4  11   3  398.96   64.49
  -4  11   3  471.15   63.59
   4 -11  -3  449.86   63.29
  -3  10   3  340.57   59.19
  -3  10   3  316.77   48.50
   3 -10  -3  313.37   47.70
   3 -10  -3  337.47   47.40
   3 -10  -3  338.67   48.80
   3 -10  -3  337.07   48.70
  -2   9   3   45.30    7.90
  -2   9   3  -20.30   41.70
  -2   9   3   37.50    6.10
  -2   9   3   35.10   21.80
   2  -9  -3   29.60    5.30
   2  -9  -3   32.80    7.90
  -1   8   3   -4.10    4.80
  -1   8   3   -7.60   15.30
  -1   8   3    5.20    2.20
  -1   8   3   14.80   36.70
   1  -8  -3    4.40    4.70
   1  -8  -3   -2.40    2.50
   0   7   3   76.19   11.50
   0   7   3   66.39   18.00
   0  -7  -3   89.49   19.90
   0  -7  -3   81.99   11.50
   1   6   3    8.70   10.10
   1   6   3   26.10    5.50
   1   6   3   30.00    4.20
  -1  -6  -3   21.30    4.40
  -1  -6  -3   37.40    5.60
  -1  -6  -3   15.00   12.60
  -1  -6  -3   27.60    4.00
   2   5   3  131.59   21.50
   2   5   3  118.69   18.20
  -2  -5  -3  128.39   21.70
   3   4   3 2012.00  289.27
   4   3   3 1331.17  199.18
  -4  -3  -3 1428.16  199.28
   5   2   3  698.43  104.79
   5   2   3  758.92  104.89
   6   1   3  103.49   15.70
   6   1   3   99.09   17.60
  -6  -1  -3  123.49   17.60
   7   0   3    0.10    6.80
   7   0   3   -4.00    1.70
   7   0   3    8.60    7.50
   7   0   3    0.90    1.00
  -7   0  -3   -1.80    5.80
  -7   0  -3   -0.70    0.90
  -7   0  -3    1.50    1.60
   8  -1   3  232.98   41.40
   8  -1   3  282.77   38.70
   9  -2   3  764.62  114.69
  -9   2  -3  832.22  114.99
  10  -3   3  600.24   94.19
 -10   3  -3  718.43   94.29
 -10   3  -3  639.74   94.19
  11  -4   3   90.49   16.00
 -11   4  -3  105.29   15.30
 -11   4  -3  110.49   16.30
 -11   4  -3  108.59   25.40
 -11   4  -3  108.39   16.10
  12  -5   3    9.60    2.40
  12  -5   3   -8.40    5.50
  12  -5   3  -10.30   24.50
 -12   5  -3    8.30    2.60
 -12   5  -3    4.10    5.60
 -12   5  -3    1.60   30.90
 -12   5  -3    3.80    5.10
  13  -6   3  -27.60   30.10
  13  -6   3   16.40    7.00
  13  -6   3    7.80    3.30
 -13   6  -3   24.70    7.70
 -13   6  -3   17.10    6.50
 -13   6  -3   26.30   27.10
  14  -7   3  -15.70   39.20
  14  -7   3   -1.50    3.90
  14  -7   3  -13.20    9.10
 -14   7  -3    2.80    9.90
 -14   7  -3    9.80   36.00
 -14   7  -3    5.50    7.70
 -14   7  -3    8.80    2.90
  15  -8   3   -6.10    4.50
  15  -8   3   -0.90   11.70
  15  -8   3   -5.70   53.89
 -15   8  -3   -0.40    8.60
 -15   8  -3   -1.30    3.20
 -15   8  -3   19.20   43.00
  16  -9   3   16.00    5.70
  16  -9   3   33.00   14.70
 -16   9  -3    8.80   11.80
 -16   9  -3   18.30    5.00
  17 -10   3  120.69   23.30
 -17  10  -3   80.49   14.60
  18 -11   3  146.99   27.60
 -18  11  -3   96.49   17.10
  19 -12   3   61.59   31.10
 -19  12  -3   45.00   11.60
  20 -13   3   74.79   36.60
   8 -16  -4   32.60   29.70
  -7  15   4  112.79   18.80
   7 -15  -4  111.59   21.50
   7 -15  -4   80.49   26.20
  -6  14   4  146.79   22.70
  -6  14   4   82.09   64.79
   6 -14  -4  146.69   26.40
  -5  13   4   69.59   50.59
   5 -13  -4   64.89   14.50
   5 -13  -4   59.89   10.00
  -4  12   4   21.60    5.40
  -4  12   4   36.90   35.70
  -4  12   4    1.00   63.79
  -4  12   4   27.20   10.80
   4 -12  -4   17.00   11.00
   4 -12  -4    7.60    6.00
   4 -12  -4   16.50   11.20
  -3  11   4    3.00   53.99
  -3  11   4   30.00    8.70
  -3  11   4  -26.50   28.80
   3 -11  -4   28.40    9.30
   3 -11  -4    4.70    4.90
   3 -11  -4   11.80    3.00
   3 -11  -4   24.10    8.90
  -2  10   4   22.80    5.30
  -2  10   4   43.00    8.10
  -2  10   4   36.50   23.30
  -2  10   4   -8.70   53.29
   2 -10  -4   27.10    8.10
   2 -10  -4   25.20    9.30
  -1   9   4   13.10    5.80
  -1   9   4   37.10   18.90
  -1   9   4   29.00   44.30
   1  -9  -4   19.80    7.50
   1  -9  -4    8.90    3.20
   1  -9  -4   18.00    5.90
   1  -9  -4    8.20    2.30
   0   8   4    4.30    1.40
   0   8   4    2.70   10.60
   0   8   4    0.20    2.20
   0   8   4   10.10   14.90
   0  -8  -4   11.10    4.60
   0  -8  -4    2.60    1.20
   0  -8  -4    1.70    2.20
   1   7   4   64.69   16.50
   1   7   4   48.50    9.00
   1   7   4   52.29    7.80
   1   7   4   46.00    8.10
  -1  -7  -4   69.69    9.50
  -1  -7  -4   64.39   17.20
   2   6   4  288.97   45.80
   2   6   4  339.27   48.90
  -2  -6  -4  365.66   49.50
   3   5   4  173.18   24.20
   3   5   4  175.08   24.00
   3   5   4  154.58   27.40
  -3  -5  -4  154.88   24.20
   4   4   4  187.08   29.30
  -4  -4  -4  217.78   29.50
   5   3   4    5.40    2.20
   5   3   4    7.00    6.00
   5   3   4    4.00    1.80
   6   2   4 1554.44  223.58
   7   1   4 2609.34  397.76
  -7  -1  -4 3023.00  397.86
  -7  -1  -4 2652.73  396.86
   8   0   4  788.42  112.79
  -8   0  -4  777.72  114.09
   9  -1   4  387.06   55.89
  -9   1  -4  386.66   55.99
  10  -2   4    2.50   14.70
  10  -2   4    5.00    3.10
  10  -2   4    6.10    1.70
 -10   2  -4    7.40    3.80
 -10   2  -4    6.50   11.10
  11  -3   4    7.60    2.00
  11  -3   4  -15.00   19.40
 -11   3  -4   10.80   16.00
 -11   3  -4   10.70    4.40
 -11   3  -4    6.30    4.40
 -11   3  -4   25.80   17.50
 -11   3  -4    3.60    2.10
 -12   4  -4   31.90   17.40
  13  -5   4  112.49   15.90
 -13   5  -4  123.59   17.50
 -13   5  -4   55.59   27.60
 -13   5  -4  107.89   17.30
 -13   5  -4  100.29   16.00
  14  -6   4  153.98   24.90
  14  -6   4  151.78   22.50
 -14   6  -4   96.79   43.20
 -14   6  -4  173.48   39.30
 -14   6  -4  184.38   24.10
 -14   6  -4  147.19   22.70
  15  -7   4  203.38   33.30
  15  -7   4  198.78   31.00
 -15   7  -4  229.78   31.10
  16  -8   4  218.48   36.10
 -16   8  -4  235.58   33.10
 -16   8  -4  120.79   56.59
  17  -9   4  163.58   24.60
 -17   9  -4   74.99   20.60
 -17   9  -4  110.09   17.40
  18 -10   4   39.90   22.10
  18 -10   4   18.50    8.00
 -18  10  -4   32.10    8.30
  19 -11   4   34.30   26.60
 -20  12  -4   -5.00   10.00
  -7  16   5   -5.40   10.90
   7 -16  -5   10.90   28.50
  -6  15   5    4.20    7.90
   6 -15  -5  -10.80   19.20
   6 -15  -5   -8.50   16.30
  -5  14   5   24.70   56.19
  -5  14   5   18.20    6.80
   5 -14  -5   -7.50   12.60
   5 -14  -5    6.50    8.30
   5 -14  -5   19.40   16.40
  -4  13   5  -18.50   46.50
   4 -13  -5   -0.40   13.50
   4 -13  -5    3.70    3.40
   4 -13  -5   17.40    6.60
   4 -13  -5   12.10   12.50
  -3  12   5   14.50   10.40
  -3  12   5   30.00   69.09
  -3  12   5   14.60   35.40
   3 -12  -5   27.50   10.80
   3 -12  -5    1.30    4.90
   3 -12  -5    5.00   11.20
  -2  11   5   24.40    9.30
  -2  11   5   25.20   28.80
  -2  11   5   41.80   57.89
   2 -11  -5   37.00    9.90
   2 -11  -5   32.70    5.20
   2 -11  -5   25.20    6.00
  -1  10   5   50.99   54.99
  -1  10   5  114.09   17.30
  -1  10   5  144.39   31.10
   1 -10  -5  112.69   19.50
   1 -10  -5  114.29   17.10
   0   9   5   73.89   13.30
   0   9   5  127.39   23.70
   0  -9  -5   97.29   13.00
   1   8   5   34.90    5.90
   1   8   5   45.30    6.40
   1   8   5   25.40   17.10
  -1  -8  -5   48.90    7.60
  -1  -8  -5   30.60    6.20
  -1  -8  -5   47.20   19.50
   2   7   5   17.30    3.30
   2   7   5    5.90   13.00
   2   7   5   14.10    2.60
   2   7   5   18.00    4.80
  -2  -7  -5   32.30   14.20
  -2  -7  -5   16.70    3.30
  -2  -7  -5   12.70    4.30
   3   6   5  279.87   37.50
   3   6   5  217.88   40.90
  -3  -6  -5  249.88   37.60
  -3  -6  -5  266.67   37.90
   4   5   5  514.55   82.89
  -4  -5  -5  601.04   83.19
  -4  -5  -5  554.84   81.09
  -4  -5  -5  579.34   81.19
   5   4   5  688.43   96.39
  -5  -4  -5  648.14   96.39
   6   3   5  178.08   29.90
   6   3   5  193.28   28.00
  -6  -3  -5  188.68   27.90
  -6  -3  -5  211.78   30.20
   7   2   5  547.15   74.19
   7   2   5  529.05   75.59
  -7  -2  -5  470.35   74.09
   8   1   5    3.80    1.50
   8   1   5    6.80    8.50
   8   1   5   -1.00    2.60
  -8  -1  -5    2.60    2.10
  -8  -1  -5   -2.90    2.20
  -8  -1  -5    5.40    8.90
   9   0   5   -2.70    2.60
   9   0   5   17.60   11.60
   9   0   5    2.50    1.50
  -9   0  -5    0.50    2.50
  -9   0  -5   -4.80    9.00
  10  -1   5  -10.30   13.70
 -10   1  -5    7.60    3.50
  11  -2   5   69.89    9.80
 -11   2  -5   55.89    9.20
  12  -3   5  288.37   40.70
  12  -3   5  249.28   41.10
 -12   3  -5  283.37   41.30
 -12   3  -5  301.97   41.50
 -12   3  -5  297.17   46.60
 -13   4  -5  340.67   48.20
 -13   4  -5  323.47   48.90
  14  -5   5  505.45   73.29
 -14   5  -5  525.25   72.69
 -14   5  -5  510.75   73.29
 -14   5  -5  444.56   81.09
 -14   5  -5  488.95   73.39
  15  -6   5  217.98   34.10
 -15   6  -5  204.38   32.60
 -15   6  -5  260.77   34.60
 -15   6  -5  223.98   33.80
  16  -7   5   43.10   12.80
  16  -7   5  -16.70   43.40
 -16   7  -5   85.19   36.70
 -16   7  -5   22.60   10.50
 -16   7  -5  102.89   42.10
 -16   7  -5   31.30    6.70
  17  -8   5   10.10   13.40
  17  -8   5   -3.60    4.60
 -17   8  -5   -0.30    4.80
 -17   8  -5  -11.50   10.40
  18  -9   5    3.60   17.20
  18  -9   5   12.80    6.90
 -18   9  -5   27.70    7.00
  19 -10   5    5.80   20.70
 -19  10  -5    9.30    7.80
  20 -11   5   15.40   24.80
 -20  11  -5    5.50    9.40
  21 -12   5    0.10   31.20
  -6  16   6    0.40   11.20
   6 -16  -6   -1.90   29.60
  -5  15   6   -3.20    8.20
   5 -15  -6   15.90   15.30
   5 -15  -6  -16.90   20.80
  -4  14   6   -4.00    7.00
  -4  14   6   10.40   53.39
   4 -14  -6    0.50   16.10
   4 -14  -6   22.30   13.50
   4 -14  -6    6.90    7.30
  -3  13   6    3.20    6.20
  -3  13   6   32.00   43.00
   3 -13  -6   19.10    6.70
   3 -13  -6    4.60   12.50
   3 -13  -6   33.00   12.30
  -2  12   6    3.00    9.30
  -2  12   6    7.30    4.80
  -2  12   6    7.40   34.60
  -2  12   6  125.49   83.89
   2 -12  -6    6.00   10.80
   2 -12  -6  -13.80   11.00
   2 -12  -6   -2.60    2.50
   2 -12  -6    0.80    5.10
  -1  11   6   32.70    9.80
  -1  11   6   31.40   28.50
  -1  11   6  -55.09   62.09
   1 -11  -6   50.39   10.30
   1 -11  -6   38.00    5.90
   1 -11  -6   32.00    6.70
   0  10   6  401.06   54.29
   0  10   6  323.37   61.59
   0 -10  -6  340.07   54.39
   0 -10  -6  383.26   53.59
   1   9   6  456.55   68.19
   1   9   6  518.35   68.89
  -1  -9  -6  469.75   75.19
  -1  -9  -6  455.45   68.39
   2   8   6  572.34   80.49
   2   8   6  557.44   83.99
  -2  -8  -6  572.14   80.49
  -2  -8  -6  556.94   80.19
  -2  -8  -6  492.15   84.59
   3   7   6  368.26   58.19
   3   7   6  379.26   54.09
   4   6   6  151.08   26.50
   4   6   6  143.39   20.30
  -4  -6  -6  133.59   21.00
   5   5   6   34.10    6.10
   5   5   6   36.00    5.60
   5   5   6   12.90   10.70
  -5  -5  -6   28.60   12.20
  -5  -5  -6   35.80    6.10
   6   4   6   97.89   13.00
   6   4   6   91.19   17.90
   6   4   6   86.59   13.20
  -6  -4  -6   75.59   13.00
  -6  -4  -6   99.89   18.30
  -6  -4  -6   82.49   13.20
   7   3   6   13.10    3.60
   7   3   6   13.10    8.80
  -7  -3  -6   16.80    3.60
  -7  -3  -6   17.60   10.10
   8   2   6   57.39    9.80
  -8  -2  -6   64.79    9.70
  -8  -2  -6   69.89   14.50
   9   1   6  123.19   19.00
  -9  -1  -6  138.49   19.20
  10   0   6  425.56   59.69
  10   0   6  408.66   55.89
 -10   0  -6  354.06   58.39
 -10   0  -6  365.56   56.09
  11  -1   6  685.13   94.69
  11  -1   6  629.64   94.49
 -11   1  -6  664.63   97.09
 -11   1  -6  648.24   94.79
  12  -2   6  253.87   34.60
 -12   2  -6  256.27   40.00
 -12   2  -6  209.38   34.70
  13  -3   6   29.70   24.30
  13  -3   6    9.30    2.60
 -13   3  -6    1.70    6.80
 -13   3  -6   -8.50   17.90
 -13   3  -6   10.30    3.00
 -13   3  -6   13.30    5.50
 -13   3  -6   24.70   18.70
  15  -5   6   52.29   13.80
  15  -5   6   81.59   11.60
 -15   5  -6   75.89   13.90
 -15   5  -6   68.69   14.40
 -15   5  -6  141.69   30.00
 -15   5  -6   76.39   12.10
  16  -6   6  109.29   17.30
  16  -6   6   81.69   45.50
  16  -6   6   80.39   13.70
 -16   6  -6  161.08   38.30
 -16   6  -6   92.59   17.00
 -16   6  -6  162.28   50.69
  17  -7   6   10.40   56.39
  17  -7   6   18.80    5.50
 -17   7  -6   76.79   38.90
 -17   7  -6   33.60    6.30
  18  -8   6    9.60   14.70
  18  -8   6    1.90    5.30
 -18   8  -6   13.00    6.20
 -18   8  -6   -7.10   12.60
  19  -9   6  -12.50    6.80
  19  -9   6  -26.00   20.50
 -19   9  -6   -4.00    6.60
  20 -10   6   12.40   23.40
 -20  10  -6   11.00   15.50
  21 -11   6   82.89   46.50
  22 -12   6   25.60   37.00
  -5  16   7   -9.60   10.10
   5 -16  -7  -24.50   20.40
  -4  15   7   18.10    8.80
   4 -15  -7  -17.40   19.70
   4 -15  -7   14.80   16.70
  -3  14   7   58.19   52.89
  -3  14   7   51.59    9.60
   3 -14  -7    8.90   16.80
   3 -14  -7   36.10   15.60
   3 -14  -7   26.30    9.60
  -2  13   7   99.09   16.10
  -2  13   7   67.29   45.20
   2 -13  -7   94.09   15.80
   2 -13  -7  116.19   21.30
   2 -13  -7   79.99   19.10
  -1  12   7  153.28   25.10
  -1  12   7  158.98   42.50
   1 -12  -7  207.18   29.00
   1 -12  -7  171.38   27.80
   0  11   7  330.77   55.89
   0  11   7  305.37   65.79
   0 -11  -7  405.96   56.99
   0 -11  -7  437.76   56.29
   1  10   7  407.46   58.49
   1  10   7  403.26   66.39
   1  10   7  432.76   59.39
  -1 -10  -7  466.25   69.99
  -1 -10  -7  356.56   59.39
   2   9   7   86.19   24.80
   2   9   7   99.79   16.30
   2   9   7   93.19   14.10
  -2  -9  -7  148.79   29.00
   3   8   7    3.20    4.60
   3   8   7    4.70   16.60
   3   8   7    1.00    2.70
  -3  -8  -7   -0.60   18.30
  -3  -8  -7    0.80    4.40
  -3  -8  -7    4.40    2.90
   4   7   7    3.50    1.50
   4   7   7    3.50    4.10
   4   7   7    6.20    2.60
   4   7   7   16.40   14.70
  -4  -7  -7    9.20    3.00
  -4  -7  -7   31.60   16.50
  -4  -7  -7   -3.80    3.90
   5   6   7    8.00   12.00
   5   6   7   -1.50    1.00
   5   6   7    2.40    2.60
   5   6   7    7.60    3.50
  -5  -6  -7    7.70   12.30
  -5  -6  -7    1.60    2.80
   6   5   7   21.40    4.90
   6   5   7   35.70   12.30
   6   5   7   20.80    3.90
  -6  -5  -7   13.40    4.50
  -6  -5  -7   16.50   12.10
   7   4   7  461.65   68.49
  -7  -4  -7  450.55   68.39
  -7  -4  -7  530.55   71.19
  -8  -3  -7  410.86   63.29
  -8  -3  -7  466.75   63.39
   9   2   7  241.78   38.50
  -9  -2  -7  270.87   38.70
  -9  -2  -7  231.68   35.30
  11   0   7   23.70   15.00
 -11   0  -7   11.20    4.40
 -11   0  -7   -4.20   11.30
  12  -1   7  159.38   27.50
  12  -1   7  121.19   16.40
  12  -1   7   90.89   16.90
 -12   1  -7  111.69   17.20
  13  -2   7  172.58   27.00
 -13   2  -7  244.08   34.70
 -13   2  -7  169.78   27.60
  14  -3   7  401.16   56.39
 -14   3  -7  370.56   56.69
  15  -4   7  133.69   17.20
  15  -4   7   22.00   39.90
  15  -4   7   96.39   18.60
 -15   4  -7  137.49   19.30
 -15   4  -7   63.59   29.40
 -15   4  -7   92.99   19.30
  16  -5   7   34.80   38.60
 -16   5  -7   11.10    8.10
 -16   5  -7   -1.00   25.50
 -16   5  -7   10.10    9.50
 -16   5  -7   15.30    4.40
  17  -6   7   17.20   10.60
  17  -6   7    0.60    3.50
  17  -6   7   16.00   46.80
 -17   6  -7   -5.80   32.60
 -17   6  -7    3.50    4.10
 -17   6  -7    8.60   10.10
  18  -7   7   -0.60    4.60
  18  -7   7  -24.40   13.90
 -18   7  -7    2.50    5.20
 -18   7  -7   13.60   12.70
  19  -8   7  -23.10   17.70
  19  -8   7   -8.70    5.50
 -19   8  -7   -0.70    6.80
  20  -9   7   28.60   22.30
 -20   9  -7   12.60    8.20
  21 -10   7   44.00   27.30
 -21  10  -7   28.20   11.90
  22 -11   7  105.49   36.30
  -4  16   8   31.70   13.20
   4 -16  -8   13.00   19.50
  -3  15   8   77.99   81.49
  -3  15   8   67.69   14.40
   3 -15  -8   58.19   21.50
   3 -15  -8  107.29   23.00
  -2  14   8   94.09   55.39
   2 -14  -8   68.39   19.10
   2 -14  -8   72.09   19.10
  -1  13   8   44.50   39.50
   1 -13  -8   38.30   14.70
   1 -13  -8   30.70    8.30
   1 -13  -8   25.60   14.70
   0  12   8   29.60    6.40
   0  12   8   17.10   11.10
   0  12   8   26.80   31.10
   0 -12  -8   18.80    6.40
   0 -12  -8   37.50   13.40
   0 -12  -8   19.70   11.20
   1  11   8    6.60    7.90
   1  11   8    0.50    2.50
   1  11   8    5.20   27.90
   1  11   8   11.10    4.60
  -1 -11  -8    5.80    4.40
  -1 -11  -8    5.10    8.10
   2  10   8   31.30   24.00
   2  10   8    0.60   42.80
   2  10   8    4.20    6.80
   2  10   8    5.00    2.10
   2  10   8   -2.00    3.90
  -2 -10  -8  -13.20   28.40
  -2 -10  -8    1.00    3.90
  -2 -10  -8   -5.70    6.80
   3   9   8   -1.30   18.90
   3   9   8   -1.50    1.70
   3   9   8    6.90    5.70
   3   9   8   -2.50    3.50
  -3  -9  -8   -1.30    5.70
  -3  -9  -8   -3.70    3.90
  -3  -9  -8   20.20   23.20
   4   8   8    6.30    4.90
   4   8   8   -2.70   16.00
   4   8   8   14.00    3.40
   4   8   8    5.90    1.80
  -4  -8  -8   -2.00    3.40
  -4  -8  -8   -2.20   18.90
  -4  -8  -8   10.50    4.80
   5   7   8   48.80    9.90
   5   7   8   62.59    8.70
  -5  -7  -8   54.59   20.10
  -5  -7  -8   57.69    9.40
   6   6   8  158.48   20.50
   6   6   8  130.19   21.30
   6   6   8  154.18   27.00
  -6  -6  -8  122.49   21.20
  -6  -6  -8  138.59   27.40
   7   5   8   61.89   15.80
   7   5   8   61.59    9.20
  -7  -5  -8   47.00    9.70
  -7  -5  -8   82.59   17.10
   8   4   8   29.50    4.90
   8   4   8   12.50    4.30
   8   4   8   27.10   12.20
  -8  -4  -8   34.70   14.50
  -8  -4  -8   21.10    4.80
  -8  -4  -8   17.70    4.60
   9   3   8  336.27   47.60
   9   3   8  332.77   47.70
   9   3   8  297.67   50.49
  -9  -3  -8  335.37   51.19
  10   2   8  296.37   44.20
 -10  -2  -8  302.57   44.40
 -10  -2  -8  318.17   44.40
  11   1   8  458.95   63.79
  11   1   8  468.55   67.69
 -11  -1  -8  375.46   66.69
 -11  -1  -8  444.76   63.69
  12   0   8  283.67   42.80
  12   0   8  305.07   43.10
 -12   0  -8  328.27   43.20
 -12   0  -8  269.27   43.10
  13  -1   8  135.69   18.60
  13  -1   8  103.39   28.70
 -13   1  -8  137.59   26.60
 -13   1  -8  105.09   18.80
  14  -2   8    7.80    5.00
  14  -2   8   14.20    3.30
  14  -2   8   33.90   28.40
 -14   2  -8   26.70    6.40
 -14   2  -8   15.00    3.50
 -14   2  -8    0.40   18.80
  15  -3   8   -0.40   27.20
  15  -3   8    0.90    2.80
  15  -3   8    2.30    5.80
 -15   3  -8   32.70   22.30
 -15   3  -8    0.00    2.80
 -15   3  -8   -3.80    6.10
  16  -4   8   -1.80    2.90
  16  -4   8   12.30   37.20
  16  -4   8   -8.40    6.90
 -16   4  -8    8.60    7.70
 -16   4  -8    1.00   25.00
 -16   4  -8    2.70    9.80
 -16   4  -8   -0.30    3.10
  17  -5   8  -10.90   43.30
  17  -5   8   27.10    5.60
  17  -5   8   33.00   12.00
 -17   5  -8   38.70   10.10
 -17   5  -8   43.80   32.00
 -17   5  -8   30.30    6.50
  18  -6   8  -51.69   58.89
  18  -6   8   24.00    5.30
 -18   6  -8  -18.80   35.90
 -18   6  -8   27.70   11.40
  19  -7   8   42.10    7.80
  19  -7   8   60.99   15.70
 -19   7  -8   36.00    8.90
 -19   7  -8   33.20   16.10
  20  -8   8   83.09   23.30
 -20   8  -8   77.29   14.80
  21  -9   8   61.89   24.00
  22 -10   8   46.50   29.70
 -22  10  -8   15.50   12.00
  23 -11   8   69.69   38.10
   4 -17  -9    7.40   26.50
  -3  16   9    4.00   12.00
   3 -16  -9   -3.90   19.80
  -2  15   9  -14.50   63.69
  -2  15   9   13.90   10.10
   2 -15  -9    4.50   18.60
   2 -15  -9  -10.40   17.40
  -1  14   9   -1.50   49.60
  -1  14   9   19.10    8.00
   1 -14  -9   15.20   16.80
   1 -14  -9    5.40   16.60
   0  13   9  -19.10   42.40
   0 -13  -9   21.10   13.30
   0 -13  -9   44.90   15.40
   0 -13  -9   26.90    8.50
   1  12   9   13.30   10.10
   1  12   9   17.30    3.50
   1  12   9   -1.70    5.50
   1  12   9  -11.70   33.20
  -1 -12  -9    4.10    6.30
  -1 -12  -9   12.20   12.50
  -1 -12  -9   20.00   11.30
   2  11   9  118.59   49.10
   2  11   9   10.70    9.30
   2  11   9   32.80    6.10
  -2 -11  -9   33.80   34.90
  -2 -11  -9   -1.70   11.70
  -2 -11  -9   17.60    6.50
   3  10   9   72.79   12.60
   3  10   9   62.59   27.50
  -3 -10  -9   70.99   14.10
  -3 -10  -9   88.49   12.60
   4   9   9   60.19    8.40
  -4  -9  -9   96.19   26.00
  -4  -9  -9   54.69   10.60
  -4  -9  -9   43.20    9.40
   5   8   9    3.10    5.00
   5   8   9    9.10    3.60
   5   8   9    2.90    1.70
   5   8   9    7.60   16.20
  -5  -8  -9    0.60    3.90
  -5  -8  -9   12.60   19.70
  -5  -8  -9    3.40    5.10
   6   7   9  142.89   25.10
   6   7   9  112.49   16.70
  -6  -7  -9  109.49   25.80
   7   6   9  674.43   93.49
  -7  -6  -9  636.74   90.29
  -7  -6  -9  582.34   90.09
   8   5   9  698.73  108.29
   8   5   9  703.23  110.49
  -8  -5  -9  839.62  108.39
   9   4   9  462.35   73.19
   9   4   9  475.95   73.09
   9   4   9  531.05   75.99
  -9  -4  -9  564.24   73.19
  10   3   9  276.17   37.80
  10   3   9  232.58   41.70
  10   3   9  230.78   37.90
 -10  -3  -9  311.07   42.70
  11   2   9   84.79   18.20
  11   2   9   36.90    7.40
 -11  -2  -9   58.09   17.10
 -11  -2  -9   53.39    8.20
 -11  -2  -9   51.19    8.40
  12   1   9   23.60   16.60
 -12  -1  -9    7.90   13.90
  13   0   9  -11.30   20.90
  13   0   9    2.90    2.60
  13   0   9  -12.10    4.00
 -13   0  -9    0.60    4.60
 -13   0  -9   -0.90    3.80
 -13   0  -9   -4.50   16.40
  14  -1   9  -19.90   33.80
  14  -1   9    7.10    2.60
  14  -1   9    2.20    4.50
  14  -1   9   15.40   25.90
 -14   1  -9   13.90    6.00
 -14   1  -9  -21.90   16.70
  15  -2   9   14.00   30.00
  15  -2   9    8.80    6.00
  15  -2   9   21.80    4.10
 -15   2  -9   37.70   21.00
 -15   2  -9   22.10    7.40
  16  -3   9   74.59   12.40
  16  -3   9   97.19   14.50
 -16   3  -9   86.89   14.70
 -16   3  -9   78.79   27.90
  17  -4   9  249.28   34.70
  17  -4   9  257.37   36.60
 -17   4  -9  200.18   36.50
 -17   4  -9  224.58   48.60
  18  -5   9  -27.90   52.89
  18  -5   9   95.69   15.50
 -18   5  -9  112.29   38.60
 -18   5  -9   61.69   12.10
  19  -6   9   70.89   15.50
 -19   6  -9   53.29   10.10
 -19   6  -9   21.70   14.40
  20  -7   9   -0.30    5.20
  20  -7   9    6.70   16.50
 -20   7  -9    3.70    7.70
  21  -8   9   15.90   19.20
 -21   8  -9  -10.20    8.50
  22  -9   9   35.20   26.00
 -22   9  -9    7.70   11.30
  23 -10   9   69.29   33.60
   3 -17 -10  -10.70   24.00
   2 -16 -10   -3.10   44.60
   2 -16 -10  -10.80   20.00
  -1  15  10   -9.70    9.50
  -1  15  10    4.30   68.29
   1 -15 -10   21.40   19.20
   1 -15 -10  -26.20   19.70
   0  14  10    3.30    7.70
   0  14  10  -54.59   49.90
   0 -14 -10   -5.10   16.60
   0 -14 -10   14.00   16.70
   1  13  10   27.90   40.70
   1  13  10   -0.80    6.70
  -1 -13 -10    8.70    7.30
  -1 -13 -10   12.40   13.10
  -1 -13 -10    6.00   15.40
   2  12  10   20.50   10.50
   2  12  10   34.80   36.40
   2  12  10    6.80    5.90
  -2 -12 -10  -12.00   10.50
  -2 -12 -10   18.00    6.30
   3  11  10   39.30    5.90
   3  11  10  -13.40   30.50
   3  11  10   75.09   51.39
   3  11  10   31.80    7.10
  -3 -11 -10   39.00   36.80
  -3 -11 -10   21.30    7.20
  -3 -11 -10   38.00   11.80
   4  10  10  185.48   28.10
   4  10  10  189.18   26.00
   4  10  10  162.28   26.80
  -4 -10 -10  153.68   41.50
   5   9  10  474.15   66.99
   5   9  10  487.85   67.49
   5   9  10  509.05   74.09
   5   9  10  453.85   66.59
  -5  -9 -10  415.66   67.39
   6   8  10  577.64   87.79
   6   8  10  555.24   91.99
   6   8  10  603.34   87.29
  -6  -8 -10  734.93   94.19
   7   7  10  474.55   69.29
   7   7  10  430.36   73.69
  -7  -7 -10  537.35   74.99
   8   6  10  232.18   43.60
  -8  -6 -10  274.17   38.90
  -8  -6 -10  273.77   46.00
   9   5  10  100.49   19.70
   9   5  10   79.79   11.40
  -9  -5 -10   87.39   21.50
  -9  -5 -10   59.99   11.10
  -9  -5 -10   49.90   11.10
  10   4  10    0.00    4.10
  10   4  10    9.90    4.70
  10   4  10   -7.80   14.60
 -10  -4 -10   10.10   15.30
 -10  -4 -10    1.10    4.00
  11   3  10  -13.30   14.60
  11   3  10    4.90    4.30
 -11  -3 -10    1.90    3.80
 -11  -3 -10    2.20   15.70
  12   2  10   16.80   17.90
  12   2  10    2.20    3.00
  12   2  10    4.20    4.80
 -12  -2 -10   19.10   16.70
 -12  -2 -10   11.20    4.60
 -12  -2 -10    9.20    4.40
  13   1  10  233.78   34.00
 -13  -1 -10  232.28   34.50
  14   0  10  476.75   77.89
  14   0  10  453.75   69.69
  14   0  10  491.05   70.09
 -14   0 -10  521.35   70.09
 -14   0 -10  483.35   70.19
 -14   0 -10  456.05   74.89
  15  -1  10  136.69   39.30
  15  -1  10  189.48   25.70
  15  -1  10  165.08   26.40
 -15   1 -10  148.59   34.10
 -15   1 -10  175.38   26.90
  16  -2  10  121.09   17.30
  16  -2  10   87.99   18.60
 -16   2 -10  176.38   32.20
 -16   2 -10  123.39   19.60
  17  -3  10    6.30    3.70
  17  -3  10   24.50    7.90
  17  -3  10   -6.50   37.90
 -17   3 -10   13.30    8.60
 -17   3 -10  -12.20   28.30
  18  -4  10   40.30   10.10
  18  -4  10   55.09   57.29
  18  -4  10   26.30    5.10
 -18   4 -10   39.20   28.80
 -18   4 -10   16.10    6.20
 -18   4 -10    2.20   10.50
  19  -5  10   34.00   13.20
  19  -5  10   30.10    6.50
 -19   5 -10   21.20   12.40
 -19   5 -10   78.89   40.10
 -19   5 -10   35.30    7.40
  20  -6  10   63.29   10.30
  20  -6  10   85.39   18.00
 -20   6 -10   37.90   11.10
  21  -7  10   43.80   18.00
 -21   7 -10   20.20    9.60
  22  -8  10   26.60   20.40
 -22   8 -10    4.70   11.10
  23  -9  10    7.30   25.40
 -23   9 -10    0.80   13.30
   2 -17 -11   -0.90   25.20
   1 -16 -11   -2.50   27.50
   0  15  11   10.60   79.89
   0  15  11   19.70    9.90
   0 -15 -11  -12.10   18.80
   0 -15 -11  -33.70   19.90
   1  14  11   32.60   54.19
   1  14  11   12.70    8.60
  -1 -14 -11   -1.70   16.70
  -1 -14 -11   -0.60   17.80
   2  13  11   38.10   46.20
   2  13  11   67.59   10.50
   2  13  11   63.19   11.90
  -2 -13 -11   89.79   19.10
  -2 -13 -11   56.99   12.40
  -2 -13 -11   33.80   17.20
   3  12  11  139.29   19.90
   3  12  11  175.08   44.30
  -3 -12 -11  110.59   23.20
  -3 -12 -11  148.99   50.39
   4  11  11  263.67   51.69
   4  11  11  255.77   38.20
   4  11  11  255.57   39.80
  -4 -11 -11  293.37   58.19
   5  10  11  209.78   28.30
   5  10  11  176.48   26.50
  -5 -10 -11  171.28   27.40
   6   9  11   57.39   25.60
   6   9  11   30.00   10.20
   6   9  11   53.89    7.80
  -6  -9 -11  107.59   43.00
  -6  -9 -11   52.29    9.30
  -6  -9 -11   47.90   10.60
   7   8  11    0.00    2.00
   7   8  11    3.10    5.90
   7   8  11   10.60   20.70
   7   8  11   -2.50    4.30
  -7  -8 -11    2.30    6.40
  -7  -8 -11    9.50    5.20
  -7  -8 -11    4.80   24.70
   8   7  11    5.10   18.30
   8   7  11   19.10    5.70
   8   7  11   21.90    5.10
  -8  -7 -11   11.20    5.60
  -8  -7 -11   -3.40   21.50
   9   6  11    2.20    4.10
   9   6  11   -3.90    5.10
   9   6  11   -8.70   16.70
  -9  -6 -11    0.70    4.70
  -9  -6 -11   -1.30    5.10
  -9  -6 -11   24.40   21.10
  10   5  11   28.60   17.60
 -10  -5 -11   19.20    5.80
 -10  -5 -11   21.80    6.10
 -10  -5 -11   30.20   19.20
  11   4  11   41.20   17.80
 -11  -4 -11   42.70    8.30
 -11  -4 -11   57.29   20.90
  12   3  11  183.48   30.10
 -12  -3 -11  163.68   31.40
 -12  -3 -11  133.09   22.80
 -12  -3 -11  156.58   22.70
  13   2  11  191.48   42.30
  13   2  11  241.98   32.70
 -13  -2 -11  199.68   41.50
 -13  -2 -11  213.58   33.00
  14   1  11   32.00    6.10
  14   1  11   52.59   26.20
 -14  -1 -11   30.80    7.70
 -14  -1 -11   34.60    7.10
  15   0  11   -5.10   23.90
  15   0  11    4.20    5.60
  15   0  11    4.70    3.20
 -15   0 -11    4.60    6.60
 -15   0 -11    0.60    4.90
 -15   0 -11    4.70   18.90
  16  -1  11   67.19   11.20
  16  -1  11    1.50   29.90
  16  -1  11   48.90    9.60
 -16   1 -11   71.49   11.20
 -16   1 -11  103.29   27.20
 -16   1 -11   57.99   12.40
  17  -2  11  108.29   15.70
  17  -2  11  108.49   17.60
  17  -2  11   15.00   45.80
 -17   2 -11   91.09   18.40
 -17   2 -11   96.89   31.30
  18  -3  11   82.19   14.60
  18  -3  11   82.79   11.90
  18  -3  11    1.80   46.90
 -18   3 -11   67.69   12.40
 -18   3 -11   55.19   15.00
  19  -4  11   48.70    8.30
  19  -4  11   16.10   62.49
  19  -4  11   44.60   13.00
 -19   4 -11   37.20   13.70
 -19   4 -11   42.90    9.30
 -19   4 -11   85.69   38.30
  20  -5  11   38.70   14.40
  20  -5  11   23.50    6.50
 -20   5 -11   18.80    7.90
  21  -6  11   22.00   16.40
 -21   6 -11   -1.00    7.90
  22  -7  11   -9.20   18.40
 -22   7 -11   -5.50   10.10
  23  -8  11   49.00   22.50
 -23   8 -11   -4.50   12.90
  24  -9  11   68.69   29.90
   2 -18 -12    3.00   31.10
   1 -17 -12   15.50   26.10
   0 -16 -12   68.49   26.00
   1  15  12  122.09   19.00
  -1 -15 -12   73.99   26.70
  -1 -15 -12   82.89   26.60
   2  14  12   94.39   15.30
   2  14  12   59.39   57.79
  -2 -14 -12   62.59   21.10
  -2 -14 -12   31.10   20.40
   3  13  12   31.00    6.40
   3  13  12   33.60   47.20
  -3 -13 -12   38.90   16.00
  -3 -13 -12   22.20   17.40
  -3 -13 -12   35.50   10.80
   4  12  12    7.50    3.80
   4  12  12   14.50    6.90
   4  12  12   23.60   37.80
  -4 -12 -12  -52.09   46.20
  -4 -12 -12   26.10    7.60
  -4 -12 -12  -10.90   12.80
   5  11  12   15.60    4.50
   5  11  12   42.80   32.50
   5  11  12   27.80    7.40
   5  11  12   32.30    9.80
  -5 -11 -12    5.40   40.50
  -5 -11 -12   16.20   11.50
  -5 -11 -12   34.50    8.60
   6  10  12   25.00   36.70
   6  10  12   51.09    7.90
   6  10  12   31.00   11.40
   6  10  12   53.69    9.70
  -6 -10 -12   69.89   37.80
   7   9  12   68.69   10.10
   7   9  12   90.29   28.40
   7   9  12   61.69   12.40
  -7  -9 -12   72.99   33.70
  -7  -9 -12   42.20   12.30
  -7  -9 -12   76.89   12.00
   8   8  12   15.00   22.60
   8   8  12   12.00    6.80
   8   8  12    8.40    2.50
   8   8  12   -1.40    4.90
  -8  -8 -12   10.70    7.20
  -8  -8 -12    7.90   25.20
  -8  -8 -12    4.90    5.90
   9   7  12    4.00    4.90
   9   7  12   -3.90    5.50
   9   7  12  -18.80   19.90
  -9  -7 -12   -5.40   25.20
  -9  -7 -12   -2.00    5.80
  -9  -7 -12    4.10    6.80
  10   6  12   49.70   10.50
  10   6  12   82.89   21.50
 -10  -6 -12   55.69   10.30
 -10  -6 -12   34.60   25.90
  11   5  12   49.10   20.70
  11   5  12   57.59   10.80
  11   5  12   67.19   10.70
 -11  -5 -12   48.30   24.70
 -11  -5 -12   52.69   10.30
  12   4  12    2.50    5.50
  12   4  12    4.30   17.90
  12   4  12   12.60    5.10
 -12  -4 -12   -7.00    5.00
 -12  -4 -12   -5.60   19.60
 -12  -4 -12   -1.40    4.90
  13   3  12  126.79   27.90
 -13  -3 -12  120.89   29.00
 -13  -3 -12   87.29   16.40
 -13  -3 -12  108.19   16.20
  14   2  12  236.58   32.70
 -14  -2 -12  205.68   33.40
  15   1  12  346.37   57.59
 -15  -1 -12  288.87   55.19
  16   0  12  240.48   45.50
  16   0  12  182.58   27.80
  16   0  12  206.28   28.80
 -16   0 -12  156.78   28.60
 -16   0 -12  260.77   42.80
 -16   0 -12  193.78   29.10
  17  -1  12   80.09   38.20
  17  -1  12   74.59   10.70
 -17   1 -12   50.49   12.90
 -17   1 -12  114.69   31.20
 -17   1 -12   43.00   12.70
  18  -2  12    5.00    4.10
  18  -2  12   44.30   47.10
  18  -2  12    1.80    8.70
 -18   2 -12   -3.30   30.70
 -18   2 -12   14.30    8.20
 -18   2 -12    4.20    9.90
  19  -3  12    1.30    4.50
  19  -3  12   -3.40   10.20
  19  -3  12   -6.70   59.19
 -19   3 -12    1.20   33.10
 -19   3 -12    3.40   10.90
  20  -4  12    0.70    5.10
  20  -4  12   -0.20   12.60
 -20   4 -12   -6.60    6.80
 -20   4 -12    5.00   12.30
  21  -5  12    4.30   14.50
 -21   5 -12    2.30    8.50
  22  -6  12   22.90   18.50
 -22   6 -12   18.40   10.80
 -23   7 -12   50.59   14.70
  24  -8  12   57.49   26.90
   1 -18 -13  -12.10   34.60
   0 -17 -13   30.40   31.00
  -1 -16 -13   15.70   24.60
   2  15  13    5.10   10.80
  -2 -15 -13  -22.10   20.10
   3  14  13   23.70    6.10
  -3 -14 -13  -12.90   18.90
  -3 -14 -13   48.60   19.70
   4  13  13   31.80    6.60
   4  13  13   27.00   47.80
  -4 -13 -13  -12.30   15.80
  -4 -13 -13   49.50   13.40
  -4 -13 -13  129.09   63.99
   5  12  13    9.70   40.70
   5  12  13   15.60    7.70
  -5 -12 -13  -33.80   49.99
  -5 -12 -13   11.30    8.60
  -5 -12 -13   24.60   13.80
   6  11  13   -2.00    9.90
   6  11  13   -6.20   34.00
   6  11  13   16.30    7.30
  -6 -11 -13    7.70   11.80
  -6 -11 -13   11.50    9.10
  -6 -11 -13   28.00   41.00
   7  10  13   23.10    7.60
   7  10  13   14.10    9.10
   7  10  13   24.40    4.60
   7  10  13   36.10   30.40
  -7 -10 -13   13.00    7.50
  -7 -10 -13   15.20   38.60
  -7 -10 -13   14.90    9.90
   8   9  13  -21.30   26.60
   8   9  13   27.00    6.70
   8   9  13   23.90    8.30
   8   9  13   17.50    4.10
  -8  -9 -13   33.10    7.80
  -8  -9 -13   -5.10   31.70
   9   8  13    2.00    6.70
   9   8  13   -1.50    5.30
   9   8  13   -1.30    2.40
   9   8  13   -4.60   24.10
  -9  -8 -13   12.30   29.00
  -9  -8 -13    3.70    6.00
  -9  -8 -13   -9.60    7.20
  10   7  13   42.40    7.60
  10   7  13   46.90   23.90
  10   7  13   26.90    8.30
 -10  -7 -13   -3.20   26.70
 -10  -7 -13   23.10    7.80
 -10  -7 -13   37.50    9.00
  11   6  13  186.98   32.20
  11   6  13  249.97   42.60
  11   6  13  222.68   32.60
 -11  -6 -13  227.78   32.90
 -11  -6 -13  273.67   47.90
  12   5  13  391.06   63.19
  12   5  13  445.46   69.49
  12   5  13  492.85   63.59
 -12  -5 -13  419.96   63.19
  13   4  13  335.67  111.19
  13   4  13  427.56   68.49
 -13  -4 -13  490.15   70.39
 -13  -4 -13  392.56   61.39
 -13  -4 -13  436.56   61.49
  14   3  13  181.08   44.30
  14   3  13  196.08   31.20
 -14  -3 -13  224.28   32.10
 -14  -3 -13  242.58   32.30
  15   2  13  104.89   15.40
  15   2  13  162.08   32.40
 -15  -2 -13   78.59   16.20
 -15  -2 -13  105.39   30.10
  16   1  13    1.90    7.10
  16   1  13   -3.40   27.00
  16   1  13   -3.90    4.10
 -16  -1 -13   -3.70    7.40
 -16  -1 -13   -2.70   24.70
 -16  -1 -13   -6.20    6.70
  17   0  13   -0.40    4.00
  17   0  13    8.30   35.10
  17   0  13    5.90    7.80
 -17   0 -13    0.80    6.40
 -17   0 -13   -0.60    9.00
 -17   0 -13  -10.40   28.90
  18  -1  13    6.70    4.40
  18  -1  13   11.20    8.50
  18  -1  13   -9.00   41.70
 -18   1 -13    8.30    7.70
 -18   1 -13    3.00    9.80
 -18   1 -13   37.70   31.80
  19  -2  13  -25.50   45.30
  19  -2  13    6.10    9.90
  19  -2  13   -1.10    4.60
 -19   2 -13  -12.90   10.30
 -19   2 -13    4.40   36.30
 -19   2 -13   -2.60    8.80
  20  -3  13   53.89   14.70
  20  -3  13   46.30    9.60
 -20   3 -13   79.19   15.10
 -20   3 -13   50.79   16.50
  21  -4  13  121.59   22.80
  22  -5  13   66.79   20.00
 -22   5 -13   90.49   16.30
  23  -6  13   54.39   22.90
 -23   6 -13   50.59   14.30
  24  -7  13   34.90   22.90
 -24   7 -13   31.20   14.60
   0 -18 -14    2.40   31.90
  -1 -17 -14   19.20   29.30
  -2 -16 -14   32.20   26.20
   3  15  14    7.30   11.50
  -3 -15 -14    7.20   23.10
  -3 -15 -14   29.20   22.40
   4  14  14    8.40    5.10
   4  14  14    6.90   56.09
   4  14  14  -28.10    9.60
  -4 -14 -14    0.10   19.20
  -4 -14 -14   -0.60   19.00
   5  13  14   -0.60   51.19
   5  13  14   -5.20    9.10
   5  13  14    5.90    4.80
  -5 -13 -14 -125.09   69.59
  -5 -13 -14  -44.40   14.30
   6  12  14   13.50    8.00
   6  12  14    6.00   42.30
   6  12  14    0.90    4.40
  -6 -12 -14   16.50   10.70
  -6 -12 -14    9.10   13.30
  -6 -12 -14   22.70   56.99
   7  11  14   20.30    8.40
   7  11  14    6.20    4.20
   7  11  14  -35.50   36.80
  -7 -11 -14   27.70    9.40
  -7 -11 -14    9.80   47.40
  -7 -11 -14    0.70   11.50
   8  10  14   11.80    9.80
   8  10  14   69.79   34.50
   8  10  14   30.60    5.60
  -8 -10 -14   30.90   10.00
  -8 -10 -14   42.60   10.90
  -8 -10 -14   88.79   41.40
   9   9  14  142.09   34.40
   9   9  14  104.89   16.60
  -9  -9 -14  101.79   18.60
  -9  -9 -14  191.08   45.30
  -9  -9 -14  140.89   21.00
  10   8  14  227.08   30.60
  10   8  14  229.78   43.50
 -10  -8 -14  199.48   48.50
 -10  -8 -14  176.58   32.00
  11   7  14  206.98   32.80
  11   7  14  264.67   43.10
 -11  -7 -14  199.48   32.70
 -11  -7 -14  279.17   49.90
  12   6  14  218.38   34.10
  12   6  14  210.28   42.50
  12   6  14  224.28   33.70
 -12  -6 -14  280.27   48.60
  13   5  14   21.10   24.60
 -13  -5 -14   10.40   27.60
  14   4  14   -8.50   23.10
 -14  -4 -14    3.60    6.60
 -14  -4 -14  -31.40   27.10
 -14  -4 -14    5.80    6.50
  15   3  14   45.90   28.60
  15   3  14   15.90    8.90
  15   3  14   14.70    5.00
 -15  -3 -14    8.50    7.40
 -15  -3 -14   21.10    7.20
 -15  -3 -14   42.70   27.40
  16   2  14   45.80   29.50
  16   2  14    2.30    4.30
  16   2  14   -1.00    7.70
 -16  -2 -14    3.40    8.30
 -16  -2 -14  -40.10   27.60
 -16  -2 -14    5.90    7.30
  17   1  14   17.70   34.70
  17   1  14    4.30    4.70
  17   1  14    0.10    7.60
 -17  -1 -14   31.60   28.60
 -17  -1 -14    8.50    7.30
 -17  -1 -14   14.20    9.20
  18   0  14   28.50   43.60
  18   0  14   73.49   13.80
 -18   0 -14   65.79   12.90
 -18   0 -14   53.39   18.50
 -18   0 -14   73.29   33.80
  19  -1  14    0.30   48.60
  19  -1  14   80.59   12.40
 -19   1 -14   62.39   14.40
 -19   1 -14   49.80   15.80
 -19   1 -14   53.09   39.70
  20  -2  14   42.40    9.40
 -20   2 -14   79.59   14.10
 -20   2 -14   42.70   14.80
 -20   2 -14   65.19   45.40
  21  -3  14   47.60   13.60
 -21   3 -14   20.00   13.60
  22  -4  14   26.50   16.80
 -22   4 -14  -19.80   14.60
  23  -5  14   41.40   21.00
  24  -6  14   54.99   23.00
  -1 -18 -15   -9.90   33.10
  -2 -17 -15  -29.40   28.90
  -3 -16 -15   -6.60   26.80
   4  15  15   13.70    7.60
  -4 -15 -15    8.10   22.00
   5  14  15   12.30    5.60
   5  14  15    3.60   10.70
  -5 -14 -15   52.29   85.99
  -5 -14 -15  -27.10   18.70
  -5 -14 -15   13.80   23.90
   6  13  15   34.70   10.70
   6  13  15   -6.60   51.39
  -6 -13 -15    6.00   17.80
  -6 -13 -15   37.80   73.59
   7  12  15   59.19   46.10
   7  12  15   95.59   13.40
  -7 -12 -15   64.99   19.70
  -7 -12 -15   71.19   61.89
  -7 -12 -15   61.29   17.90
   8  11  15   98.69   16.30
   8  11  15   88.89   43.40
   8  11  15  113.29   19.00
  -8 -11 -15  112.99   20.10
  -8 -11 -15  105.59   20.10
  -8 -11 -15  117.29   54.59
   9  10  15   89.19   14.10
   9  10  15  134.89   38.40
  -9 -10 -15   97.69   17.80
  -9 -10 -15   64.09   50.09
  10   9  15   27.30    5.70
  10   9  15   21.10   10.30
  10   9  15   29.20    8.60
  10   9  15   31.20   32.30
 -10  -9 -15   49.70   11.10
 -10  -9 -15   31.50   40.50
 -10  -9 -15   27.60   10.40
  11   8  15   -5.20    8.80
  11   8  15   30.10   31.10
  11   8  15    1.90    7.40
 -11  -8 -15    2.50    9.50
 -11  -8 -15   10.30    8.60
 -11  -8 -15   -9.60   36.80
  12   7  15  -22.80   26.40
  12   7  15   -3.20    7.10
 -12  -7 -15   14.60    7.40
 -12  -7 -15   -3.80    8.00
 -12  -7 -15   10.10   35.20
  13   6  15   45.50   25.80
  13   6  15    8.40    9.00
  13   6  15    5.70    7.50
 -13  -6 -15   14.30    8.30
 -13  -6 -15  -33.10   30.70
 -13  -6 -15   34.10    8.70
  14   5  15   19.10   27.00
  14   5  15  -10.60    7.30
 -14  -5 -15    1.30    8.50
 -14  -5 -15   16.20    7.60
  15   4  15    8.00   28.20
  15   4  15   -3.60    7.20
  15   4  15   -2.10    5.00
 -15  -4 -15  -10.40    6.90
 -15  -4 -15   -0.20    7.80
 -15  -4 -15    6.70   31.30
  16   3  15   33.40    7.40
  16   3  15   20.70    9.00
  16   3  15   -4.00   33.20
 -16  -3 -15   33.10    9.10
 -16  -3 -15   38.10   10.00
 -16  -3 -15   62.69   30.00
  17   2  15   28.50    9.60
  17   2  15  -20.80   36.10
 -17  -2 -15   17.20    8.70
 -17  -2 -15   30.00   10.20
 -17  -2 -15   20.60   32.60
  18   1  15   62.09   36.20
  18   1  15    5.70    5.40
  18   1  15    6.20    8.80
 -18  -1 -15   43.20   33.80
 -18  -1 -15   18.60    8.70
 -18  -1 -15   22.60   10.80
  19   0  15   -1.20    5.40
  19   0  15   -9.10   45.50
  19   0  15   -4.60   10.40
 -19   0 -15   -6.40   12.40
 -19   0 -15   13.50    9.70
 -19   0 -15  -19.00   38.10
  20  -1  15   41.20   12.70
 -20   1 -15   29.40   14.90
 -20   1 -15   28.90   12.10
  21  -2  15   89.69   19.00
 -21   2 -15   99.69   19.80
  22  -3  15  147.69   25.30
 -22   3 -15  114.49   24.70
  23  -4  15   70.49   21.10
  24  -5  15   48.20   21.40
 -24   5 -15    1.30   20.70
  25  -6  15   29.60   26.80
  -2 -18 -16  -27.00   34.40
  -3 -17 -16    5.50   34.00
  -4 -16 -16  -19.70   27.40
   5  15  16   11.80    7.60
  -5 -15 -16    3.70   23.00
   6  14  16   61.99   10.40
  -6 -14 -16    8.80   23.20
   7  13  16   43.30   11.80
   7  13  16   29.90    7.40
   7  13  16    9.20   70.09
  -7 -13 -16  -51.99   81.09
  -7 -13 -16   18.50   19.30
   8  12  16   11.00    5.10
   8  12  16   33.70   49.60
   8  12  16   27.10   10.40
  -8 -12 -16   19.90   15.00
  -8 -12 -16  -20.10   69.59
   9  11  16    6.10   41.20
   9  11  16    0.90    9.70
   9  11  16   -5.20    3.80
  -9 -11 -16   31.90   12.00
  -9 -11 -16   27.90   55.49
  -9 -11 -16    6.40   12.80
  10  10  16   26.00   39.80
  10  10  16   29.60    6.30
  10  10  16   50.99   10.50
 -10 -10 -16  -15.70   47.30
 -10 -10 -16   11.20   13.70
 -10 -10 -16   36.30   10.80
  11   9  16   44.70    7.40
  11   9  16   31.10   34.90
  11   9  16   15.40   19.20
  11   9  16   58.99   11.70
 -11  -9 -16   41.60   46.60
 -11  -9 -16   34.80   12.50
 -11  -9 -16   39.30   12.20
  12   8  16  -15.00   30.90
  12   8  16   -5.80   11.10
  12   8  16    7.40    8.30
 -12  -8 -16   18.40   39.40
 -12  -8 -16   -4.20   10.10
 -12  -8 -16   10.90   10.50
  13   7  16   -8.50    7.80
  13   7  16   26.60   30.30
  13   7  16  -10.70   10.10
 -13  -7 -16    0.80   16.70
 -13  -7 -16   10.20    9.00
 -13  -7 -16  -31.20   38.10
  14   6  16   -8.70    7.40
  14   6  16    5.90    9.80
 -14  -6 -16   18.60    9.00
 -14  -6 -16   21.90    9.70
 -14  -6 -16   -6.70   35.90
  15   5  16    2.90    8.70
  15   5  16    8.20    5.70
  15   5  16   50.69   31.70
 -15  -5 -16   26.10   37.00
 -15  -5 -16    9.00    8.40
 -15  -5 -16   14.50    8.60
  16   4  16    4.50    8.70
  16   4  16    7.20   34.00
  16   4  16   -0.70    5.60
 -16  -4 -16  -23.90   35.40
 -16  -4 -16   11.50    8.50
  17   3  16    3.00    9.40
  17   3  16   12.10    6.10
  17   3  16   54.09   39.20
 -17  -3 -16    5.20   10.40
 -17  -3 -16    7.30    8.60
 -17  -3 -16   20.40   37.50
  18   2  16   53.79   11.90
  18   2  16   80.29   14.40
  18   2  16  128.39   45.40
 -18  -2 -16   81.49   14.20
 -18  -2 -16  137.69   41.20
 -18  -2 -16   60.29   15.40
  19   1  16  169.58   55.69
  19   1  16  100.79   16.80
 -19  -1 -16  115.69   18.70
 -19  -1 -16   90.89   43.60
 -19  -1 -16   74.29   20.20
  20   0  16  137.79   22.40
 -20   0 -16  117.39   50.79
 -20   0 -16   94.19   20.40
  21  -1  16  125.99   21.20
 -21   1 -16   93.09   21.20
  22  -2  16   25.60   16.60
 -22   2 -16   43.10   16.20
  23  -3  16   21.60   19.50
  24  -4  16   24.70   18.50
 -24   4 -16   -0.30   19.10
  25  -5  16   55.29   26.30
  -4 -17 -17   -9.90   34.10
  -5 -16 -17  -33.70   27.60
   6  15  17   15.90    7.50
  -6 -15 -17  -27.20   24.40
   7  14  17    1.10   18.10
  -7 -14 -17  -40.60   35.90
   8  13  17   19.30   12.10
   8  13  17   24.50    6.40
  -8 -13 -17   34.30   89.09
  -8 -13 -17  -20.60   21.20
   9  12  17  -47.70   54.29
  -9 -12 -17   -1.40   17.40
  -9 -12 -17   33.60   75.09
  10  11  17   12.20   10.00
  10  11  17    8.80    4.80
  10  11  17  -39.80   47.90
 -10 -11 -17   -4.20   14.90
 -10 -11 -17   -0.70   61.49
  11  10  17    0.40    4.00
  11  10  17   -8.40    9.60
  11  10  17   20.00   44.80
 -11 -10 -17   15.20   11.90
 -11 -10 -17  -22.00   56.29
 -11 -10 -17   -5.00   13.40
  12   9  17    2.80   10.10
  12   9  17  -30.00   38.40
  12   9  17   -0.60    3.80
 -12  -9 -17   -3.00   11.10
 -12  -9 -17   17.40   51.09
 -12  -9 -17    6.50   10.00
  13   8  17  -11.30    9.00
  13   8  17    3.60   35.90
 -13  -8 -17   -1.10    9.70
 -13  -8 -17   -4.40   10.30
 -13  -8 -17  -15.30   42.80
  14   7  17  -13.20    8.50
  14   7  17   -2.10   34.50
 -14  -7 -17   13.00   10.50
 -14  -7 -17   14.70   10.20
 -14  -7 -17   -7.70   43.10
  15   6  17   67.09   37.70
 -15  -6 -17    5.00   44.30
 -15  -6 -17   27.60   10.00
 -15  -6 -17   17.20   10.10
  16   5  17   -7.50   36.90
 -16  -5 -17   41.60   10.60
 -16  -5 -17   13.90   11.40
 -16  -5 -17    5.50   42.00
  17   4  17   92.19   15.50
  17   4  17  117.59   44.00
 -17  -4 -17   72.99   44.10
 -17  -4 -17  101.89   17.20
 -17  -4 -17   79.69   17.80
  18   3  17   62.59   14.80
  18   3  17   42.50   51.29
 -18  -3 -17   72.09   16.40
 -18  -3 -17   88.59   42.90
 -18  -3 -17   82.29   15.40
  19   2  17   96.69   53.59
  19   2  17   46.00   12.30
 -19  -2 -17   75.09   42.00
 -19  -2 -17   37.70   15.90
  20   1  17   37.80   12.30
 -20  -1 -17   22.80   12.60
  21   0  17   -1.70   13.60
 -21   0 -17    7.90   13.00
  22  -1  17   21.50   14.50
 -22   1 -17    0.10   16.40
 -23   2 -17   -1.70   30.80
  24  -3  17    4.10   20.40
 -24   3 -17    4.50   21.20
  25  -4  17   44.80   28.90
  -4 -18 -18  -25.00   40.30
  -5 -17 -18   10.90   34.00
  -6 -16 -18    3.20   29.50
  -7 -15 -18   -3.50   26.40
   8  14  18    0.80    7.50
   9  13  18    4.30    6.70
   9  13  18  -14.00   13.10
  10  12  18   16.10   13.20
 -10 -12 -18  -16.40   18.50
 -10 -12 -18   59.59   86.29
  11  11  18    8.40   17.90
  11  11  18   18.10   53.99
  11  11  18   -1.20    4.90
 -11 -11 -18   16.80   71.39
 -11 -11 -18  -23.70   16.00
  12  10  18   15.50    5.10
  12  10  18   36.10   11.70
  12  10  18   40.00   50.49
 -12 -10 -18    3.20   14.50
 -12 -10 -18  -32.60   63.09
  13   9  18   42.30    7.90
  13   9  18   33.30   45.30
 -13  -9 -18   73.89   58.99
 -13  -9 -18   52.29   15.50
  14   8  18  125.29   43.70
 -14  -8 -18   -1.40   54.19
 -14  -8 -18   99.69   18.90
  15   7  18   87.59   40.50
 -15  -7 -18   87.19   16.00
 -15  -7 -18   60.29   15.30
 -15  -7 -18   65.39   52.49
  16   6  18   74.09   46.50
 -16  -6 -18   69.89   15.00
 -16  -6 -18   62.99   15.30
 -16  -6 -18   -1.10   48.30
  17   5  18   20.80   45.00
  17   5  18   48.80   12.90
 -17  -5 -18   21.00   12.40
 -17  -5 -18   24.80   11.70
 -17  -5 -18   13.40   47.00
  18   4  18   34.20   45.00
  18   4  18    0.00   10.70
 -18  -4 -18  -29.60   42.20
 -18  -4 -18  -13.80   10.90
  19   3  18   18.30   12.80
 -19  -3 -18   11.90   11.20
 -19  -3 -18  -25.90   47.50
  20   2  18    4.30   13.50
 -20  -2 -18   19.50   12.30
  21   1  18   31.50   13.10
 -21  -1 -18   17.60   15.00
  22   0  18    6.00   15.70
 -22   0 -18    0.40   15.20
  23  -1  18    6.30   18.00
 -23   1 -18   19.50   19.70
  24  -2  18   23.00   17.80
 -24   2 -18   -1.50   19.60
  -6 -17 -19   13.90   40.60
  -7 -16 -19  -18.50   30.60
  -8 -15 -19   -4.60   27.50
  10  13  19   -0.30    7.60
 -10 -13 -19  -10.30   23.30
  11  12  19   25.10    7.20
 -11 -12 -19   45.90   21.30
  12  11  19   50.19    9.20
 -12 -11 -19   35.70   81.89
 -12 -11 -19   45.60   19.30
  13  10  19   30.40    6.90
 -13 -10 -19   -1.40   71.79
 -13 -10 -19   44.60   16.60
  14   9  19   29.20    7.30
  14   9  19   69.69   13.80
  14   9  19   50.59   77.49
 -14  -9 -19   42.60   15.10
 -14  -9 -19   38.20   66.39
  15   8  19    5.10   11.30
  15   8  19   16.70   49.10
 -15  -8 -19    0.40   12.80
 -15  -8 -19  -29.90   57.79
  16   7  19   -1.00   11.20
  16   7  19   39.00   50.59
 -16  -7 -19  -16.30   54.09
 -16  -7 -19    7.90   12.20
  17   6  19    3.40   12.10
 -17  -6 -19   11.70   11.90
 -17  -6 -19  -37.00   55.19
  18   5  19    1.00   11.10
 -18  -5 -19   -8.50   12.70
 -18  -5 -19   19.20   55.49
  19   4  19    8.10   12.50
 -19  -4 -19  -10.00   11.60
  20   3  19   60.69   14.40
 -20  -3 -19   -0.90   12.70
  21   2  19   23.00   15.50
 -21  -2 -19   30.40   14.50
  22   1  19   28.20   17.00
 -22  -1 -19    3.70   15.40
  23   0  19    7.80   15.20
 -23   0 -19  -12.50   18.60
  24  -1  19   32.30   18.60
 -24   1 -19   -0.60   19.90
  -7 -17 -20   -1.70   36.20
  -8 -16 -20   -6.60   31.00
  -9 -15 -20  -11.90   28.60
  11  13  20   24.10   11.00
  12  12  20   -6.10    9.90
 -12 -12 -20   26.20   21.70
  13  11  20   -2.10    5.90
  13  11  20   28.90   14.70
 -13 -11 -20    7.10   17.90
  14  10  20   33.20   13.70
  14  10  20   -4.80    5.80
 -14 -10 -20   16.40   16.10
  15   9  20   53.99   14.70
 -15  -9 -20   14.70   17.00
  16   8  20   22.70   13.90
 -16  -8 -20    4.10   15.20
 -17  -7 -20   15.10   13.90
  18   6  20   32.40   17.80
 -18  -6 -20    3.30   14.80
 -19  -5 -20    2.70   14.00
 -20  -4 -20   -0.80   13.70
  21   3  20   22.10   14.50
 -21  -3 -20   27.60   15.60
  22   2  20   69.09   18.30
 -22  -2 -20   15.80   19.10
  23   1  20   74.79   20.00
 -23  -1 -20   48.60   20.60
  24   0  20   66.59   20.90
 -24   0 -20   43.90   22.70
 -10 -15 -21  -16.80   29.90
  13  12  21   20.60    8.10
  14  11  21    5.40    7.10
 -14 -11 -21    0.90   21.00
  15  10  21   34.50   15.20
  15  10  21  -15.30    8.30
 -15 -10 -21   -2.20   20.30
  16   9  21   22.00   16.20
  17   8  21   12.40   14.70
 -17  -8 -21  -17.90   20.00
  18   7  21   -7.00   14.40
 -18  -7 -21   27.20   15.60
  19   6  21  112.49   18.70
 -19  -6 -21   28.90   21.60
  20   5  21   46.30   15.50
  21   4  21  101.29   20.10
 -21  -4 -21   80.79   22.10
  22   3  21   68.49   18.40
 -22  -3 -21   45.60   19.80
  23   2  21   54.29   22.40
 -23  -2 -21   49.70   22.10
 -24  -1 -21   43.20   27.40
 -10 -16 -22  -26.60   33.00
 -11 -15 -22  -15.10   34.60
  15  11  22    2.50   10.00
 -16 -10 -22    9.70   22.00
 -17  -9 -22   28.60   18.80
 -18  -8 -22   56.59   21.80
 -19  -7 -22   66.99   21.10
  20   6  22   65.69   20.00
 -20  -6 -22   51.29   20.90
 -21  -5 -22   20.60   19.00
 -22  -4 -22   32.50   21.50
 -23  -3 -22   -1.00   21.00
 -12 -15 -23   -7.30   34.60
 -18  -9 -23   33.90   22.10
 -19  -8 -23   10.70   20.90
 -20  -7 -23   23.40   20.00
 -21  -6 -23   34.50   23.50
 -14 -11 -31  -24.30   31.60
 -13 -11 -30   -1.20   30.30
 -12 -12 -30   -9.20   32.30
 -11 -13 -30   69.59   37.20
 -12 -11 -29  -26.60   27.30
 -11 -12 -29  -32.10   29.50
 -10 -13 -29   20.50   33.10
  -9 -14 -29    4.20   35.30
 -11 -11 -28   -6.60   24.90
 -10 -12 -28  -23.90   26.20
  -9 -13 -28  -15.50   30.00
  -8 -14 -28  -29.20   32.30
 -21   0 -27   19.20   34.20
 -20  -1 -27   22.00   21.10
 -19  -2 -27   10.40   22.80
  18   3  27   37.60   24.40
  17   4  27   22.70   15.70
  16   5  27   31.10   16.60
  15   6  27   43.10   18.80
  14   7  27   33.40   16.60
  13   8  27   52.39   18.60
  12   9  27    5.50    6.90
 -10 -11 -27   25.80   22.50
  -9 -12 -27   26.50   26.00
  -8 -13 -27   41.30   29.50
  -7 -14 -27   -4.40   30.50
  -6 -15 -27    8.20   35.90
 -21   1 -26   15.00   23.90
 -20   0 -26   24.80   21.60
 -19  -1 -26   36.80   20.10
  19   1  26   15.40   17.20
 -18  -2 -26   27.10   18.80
  18   2  26    2.20   15.30
 -17  -3 -26   18.20   17.50
 -17  -3 -26   69.79   65.29
  17   3  26   20.10   14.70
 -16  -4 -26   11.40   14.90
 -16  -4 -26  -38.40   58.69
  16   4  26   13.70   66.79
  16   4  26   27.30   14.80
 -15  -5 -26   17.50   16.10
 -15  -5 -26   15.30   64.69
  15   5  26   -4.90   14.90
  15   5  26  -13.10   68.39
 -14  -6 -26   29.10   23.80
 -14  -6 -26    8.70   98.29
  14   6  26   56.89   16.50
  14   6  26   69.39   68.39
  13   7  26  175.78   30.90
  13   7  26   84.19   71.79
  12   8  26  183.58   33.40
  11   9  26   72.19   16.60
  11   9  26   38.70    8.80
  10  10  26   19.70   17.00
  10  10  26   25.30    7.30
  -9 -11 -26   10.70   16.30
  -8 -12 -26  -34.00   22.50
  -7 -13 -26   34.00   27.60
  -6 -14 -26    4.00   27.70
  -4 -16 -26  -15.50   38.30
 -21   2 -25   19.20   21.70
 -20   1 -25   14.30   21.50
  20  -1  25   17.20   19.10
 -19   0 -25    6.00   16.70
  19   0  25    8.10   15.40
 -18  -1 -25   14.50   17.40
 -18  -1 -25   15.00   66.49
  18   1  25   39.60   15.60
 -17  -2 -25   16.90   15.80
 -17  -2 -25   26.80   59.69
  17   2  25   -8.10   86.09
 -16  -3 -25  117.29   59.99
  16   3  25  102.49   71.59
  16   3  25  153.68   27.30
 -15  -4 -25   85.69   19.20
 -15  -4 -25   38.10   55.99
  15   4  25  114.79   64.19
 -14  -5 -25   45.40   55.39
 -14  -5 -25   39.00   17.00
  14   5  25   71.19   15.60
 -13  -6 -25  -28.20   54.39
 -13  -6 -25   40.40   15.80
  13   6  25   60.29   60.39
  13   6  25   22.70   13.40
 -12  -7 -25    2.50   14.80
 -12  -7 -25   28.40   57.39
  12   7  25    5.80   12.70
  12   7  25   17.30   55.79
 -11  -8 -25  -43.70   63.99
  11   8  25   23.70   15.10
  11   8  25  -17.80   56.09
  10   9  25  -31.20   58.39
  10   9  25    2.20   14.50
   9  10  25    0.40   13.40
   9  10  25   -3.70    5.60
  -8 -11 -25    2.10   19.40
   8  11  25  -12.90    6.30
   8  11  25    1.30   15.40
  -7 -12 -25    3.30   21.70
  -6 -13 -25    2.50   19.90
  -5 -14 -25   11.10   28.30
  -4 -15 -25   17.00   31.70
  -3 -16 -25    9.80   35.10
 -21   3 -24   27.60   24.70
 -20   2 -24   20.00   22.40
  20  -2  24   24.60   18.20
 -19   1 -24   34.80   18.20
  19  -1  24   59.89   17.10
 -18   0 -24   98.19   22.10
 -17  -1 -24  154.08   59.29
 -17  -1 -24  101.89   21.40
  17   1  24   50.89   68.09
  17   1  24  111.29   20.90
 -16  -2 -24   38.70   50.89
 -16  -2 -24   59.49   16.00
 -16  -2 -24   40.90   21.10
  16   2  24   18.90   52.69
  16   2  24   61.99   15.50
 -15  -3 -24   17.50   12.50
 -15  -3 -24   45.00   47.30
 -15  -3 -24   24.30   18.50
  15   3  24   76.59   57.19
  15   3  24    6.20   11.90
 -14  -4 -24   13.40   12.10
 -14  -4 -24   26.80   45.40
 -14  -4 -24   11.20   15.60
  14   4  24   -6.20   51.19
  14   4  24   13.80   13.00
 -13  -5 -24    5.50   46.80
 -13  -5 -24   15.50   12.60
  13   5  24   17.50   47.20
  12   6  24   50.49   48.30
  12   6  24   62.79   16.10
 -11  -7 -24  -23.10   50.49
 -11  -7 -24   -6.40   13.30
  11   7  24   32.30   11.90
  11   7  24   16.70   45.50
 -10  -8 -24   -5.90   14.00
 -10  -8 -24   26.10   54.19
  10   8  24    0.50   12.70
  10   8  24  -45.10   48.90
  -9  -9 -24    7.50   64.69
   9   9  24  -21.60   48.90
   9   9  24   12.20    5.20
   9   9  24   14.70   12.20
   8  10  24  -51.19   53.99
  -7 -11 -24   11.70   19.00
   7  11  24   13.60   12.90
   7  11  24   -0.70    5.70
  -6 -12 -24    1.20   20.10
   6  12  24   -4.40    6.70
   6  12  24   12.00   14.00
  -5 -13 -24   36.20   25.50
  -4 -14 -24   49.40   22.10
  -3 -15 -24   33.80   30.50
  -2 -16 -24   66.99   40.60
  -1 -17 -24  -23.70   38.80
 -21   4 -23   35.90   23.50
  20  -3  23   58.39   19.20
 -19   2 -23   27.60   18.80
  19  -2  23   56.39   17.30
 -18   1 -23   30.10   16.80
 -18   1 -23  -38.60   58.99
  18  -1  23   42.40   15.20
 -17   0 -23  -57.49   51.09
 -17   0 -23   -0.70   12.40
  17   0  23  -15.80   66.39
  17   0  23   -9.50   13.10
 -16  -1 -23   58.49   14.10
 -16  -1 -23   25.80   18.50
 -16  -1 -23   55.39   46.80
  16   1  23   28.60   13.90
  16   1  23   59.79   62.19
 -15  -2 -23   48.40   18.30
 -15  -2 -23   77.79   41.90
  15   2  23   61.89   50.29
  15   2  23   72.39   15.80
 -14  -3 -23   50.49   12.90
 -14  -3 -23   54.09   42.30
  14   3  23   16.50   46.50
  14   3  23   47.20   12.90
 -13  -4 -23   38.70   39.90
 -13  -4 -23    3.20    9.90
 -13  -4 -23   44.30   13.90
  13   4  23  -25.30   40.30
  13   4  23    7.00   10.50
 -12  -5 -23    4.90   11.00
 -12  -5 -23   12.60   14.10
 -12  -5 -23  -25.00   39.00
  12   5  23  -10.40    9.80
  12   5  23  -28.50   40.80
 -11  -6 -23   14.00   12.20
 -11  -6 -23   29.60   42.70
 -11  -6 -23    7.70   11.10
  11   6  23    5.00   39.00
  11   6  23   17.50   11.90
 -10  -7 -23   10.30   46.50
 -10  -7 -23   33.40   13.10
  10   7  23   46.40   12.30
  10   7  23   27.10   40.30
  -9  -8 -23   10.30   12.90
   9   8  23   17.40   10.80
   9   8  23   25.70   40.70
  -8  -9 -23  -10.60   56.69
  -8  -9 -23   18.20   14.40
   8   9  23   11.30    4.90
  -7 -10 -23   35.70   68.99
   7  10  23   27.30    6.40
   7  10  23   31.40   48.00
  -6 -11 -23   65.39   21.50
   6  11  23   34.80   57.09
   6  11  23   52.89    9.70
  -5 -12 -23    7.90   19.50
   5  12  23   29.90    7.80
   5  12  23   38.40   13.40
  -4 -13 -23   27.50   21.90
   4  13  23   14.40    8.20
   4  13  23   40.30   16.50
  -3 -14 -23  -21.50   25.00
  -2 -15 -23  -16.30   28.70
  -1 -16 -23  -11.10   32.60
   0 -17 -23  -18.10   38.70
 -21   5 -22   28.20   22.20
 -20   4 -22    3.60   35.10
  20  -4  22    0.90   16.90
 -19   3 -22   -0.90   15.70
 -18   2 -22   51.59   17.60
 -18   2 -22   96.79   60.79
  18  -2  22   56.49   15.70
 -17   1 -22   76.49   52.49
 -17   1 -22   53.89   16.30
 -17   1 -22   85.19   22.40
  17  -1  22   75.19   15.80
  17  -1  22   29.10   68.89
 -16   0 -22   41.00   17.30
 -16   0 -22   49.80   44.20
 -16   0 -22   49.40   13.90
  16   0  22   79.29   14.70
  16   0  22    3.00   56.69
 -15  -1 -22   38.10   38.40
 -15  -1 -22   30.30   12.10
 -15  -1 -22   33.90   18.70
  15   1  22   19.70   49.50
  15   1  22   55.09   12.60
 -14  -2 -22    1.30    9.20
 -14  -2 -22    0.60   14.10
 -14  -2 -22  -10.60   35.60
  14   2  22   -1.50    6.00
  14   2  22   -7.80   44.60
  14   2  22   -1.90   11.10
 -13  -3 -22   28.70    9.90
 -13  -3 -22    9.50   12.20
 -13  -3 -22   -9.50   34.40
  13   3  22   40.10   38.70
  13   3  22    7.30    5.60
  13   3  22    4.00    9.90
 -12  -4 -22   14.20    8.80
 -12  -4 -22   22.30   35.40
 -12  -4 -22    1.90   11.40
  12   4  22    2.80    5.70
  12   4  22    7.30   35.20
  12   4  22   20.60   10.10
 -11  -5 -22   -2.30   36.60
 -11  -5 -22    1.30   11.70
  11   5  22   33.20   37.90
  11   5  22   23.10    9.60
 -10  -6 -22   63.19   39.30
 -10  -6 -22   58.89   14.20
  10   6  22   47.60   13.10
  10   6  22   77.39   36.50
  -9  -7 -22  141.09   51.89
  -9  -7 -22  142.79   27.90
   9   7  22  163.08   44.00
   9   7  22  190.58   27.40
  -8  -8 -22  209.48   33.00
  -8  -8 -22  238.08   57.49
   8   8  22  190.18   28.30
   8   8  22  142.59   47.40
   7   9  22   88.29   42.70
   7   9  22   94.89   14.70
  -6 -10 -22   19.10   14.60
  -6 -10 -22   27.60   59.29
   6  10  22   40.40   11.60
   6  10  22   12.60    5.50
   6  10  22    8.20   74.79
  -5 -11 -22  -25.60   69.69
  -5 -11 -22    4.30   16.40
   5  11  22   -9.20    4.80
   5  11  22  -15.10   49.50
   5  11  22    4.20   11.50
  -4 -12 -22    0.40   18.70
   4  12  22   -3.10   20.60
  -3 -13 -22   -8.60   21.60
   3  13  22   -0.90   12.20
   3  13  22   -6.00    7.20
  -2 -14 -22   14.90   25.60
  -1 -15 -22    3.80   28.20
   0 -16 -22   26.60   32.20
 -21   6 -21   -8.40   24.40
 -20   5 -21   35.80   23.60
  20  -5  21   64.69   20.70
 -19   4 -21   90.69   22.40
  19  -4  21  114.19   33.10
 -18   3 -21   29.80   61.19
 -18   3 -21   77.79   18.90
  18  -3  21   89.19   19.30
 -17   2 -21  -32.80   49.20
 -17   2 -21   15.40   12.20
 -17   2 -21    9.60   15.20
  17  -2  21    7.80   11.50
  17  -2  21  -34.70   63.99
 -16   1 -21   27.40   41.90
 -16   1 -21   13.10   15.60
 -16   1 -21   10.30   11.70
  16  -1  21   -5.80   10.70
  16  -1  21    3.60   58.39
 -15   0 -21    5.90   10.10
 -15   0 -21   -8.80   14.70
 -15   0 -21   57.59   38.60
  15   0  21   36.70   49.70
  15   0  21   -1.80   12.60
  15   0  21    2.20    5.50
 -14  -1 -21  -19.10   31.40
 -14  -1 -21   -2.20   12.00
 -14  -1 -21   -3.80    8.90
  14   1  21   -3.20    5.50
  14   1  21    0.70    8.70
  14   1  21    2.50   39.40
 -13  -2 -21   70.79   35.30
 -13  -2 -21   71.19   17.70
 -13  -2 -21   59.79   15.50
  13   2  21   73.29   14.60
  13   2  21   79.29   38.60
 -12  -3 -21  142.09   25.20
 -12  -3 -21  123.69   39.50
 -12  -3 -21  141.39   24.10
  12   3  21  166.88   43.80
  12   3  21  170.78   25.60
 -11  -4 -21  266.47   37.40
 -11  -4 -21  213.28   37.80
 -11  -4 -21  279.97   50.89
  11   4  21  255.07   50.29
 -10  -5 -21  280.07   52.99
 -10  -5 -21  283.97   37.90
 -10  -5 -21  223.28   37.40
  10   5  21  234.18   37.70
  10   5  21  213.98   48.80
  -9  -6 -21  112.69   19.30
  -9  -6 -21  168.18   39.70
  -9  -6 -21  106.69   20.30
   9   6  21   73.09   34.60
  -8  -7 -21   44.30   11.50
  -8  -7 -21   74.69   38.30
  -8  -7 -21   37.30   10.90
   8   7  21   48.70   30.20
   8   7  21   21.70   10.70
  -7  -8 -21    8.50    9.80
  -7  -8 -21    4.80    9.90
  -7  -8 -21  -16.30   39.30
   7   8  21   -2.50    8.90
   7   8  21   -2.10    8.80
   7   8  21   -4.00    3.40
   7   8  21   -3.20   31.30
  -6  -9 -21    9.90   11.90
  -6  -9 -21   50.89   47.70
   6   9  21   10.30   11.00
   6   9  21   22.10    5.00
   6   9  21   42.90   10.50
   6   9  21   31.10   34.50
  -5 -10 -21   79.99   73.39
  -5 -10 -21  -10.40   14.10
   5  10  21   15.70    9.10
   5  10  21  -33.80   39.70
  -4 -11 -21   -8.00   15.70
  -4 -11 -21  -35.00   62.69
   4  11  21   -6.60    4.70
   4  11  21   -0.20   42.70
   4  11  21   15.90    9.70
  -3 -12 -21    7.70   20.30
   3  12  21   -4.60    9.90
   3  12  21   14.90    6.00
   3  12  21  -12.10   50.09
  -2 -13 -21   20.40   21.60
   2  13  21   18.20   12.40
   2  13  21    4.30    6.30
  -1 -14 -21   15.50   24.10
   1  14  21   27.70   14.50
   1  14  21   18.80    7.70
   0 -15 -21  -23.40   26.40
   1 -16 -21   15.30   30.30
   2 -17 -21   18.60   36.00
 -21   7 -20   30.10   22.50
 -20   6 -20  -25.10   20.30
  20  -6  20   61.49   21.50
 -19   5 -20    1.80   16.50
 -18   4 -20   -1.70   14.30
 -18   4 -20  -22.40   59.09
  18  -4  20    8.60   13.90
 -17   3 -20    1.40   47.80
 -17   3 -20  -10.90   14.80
 -17   3 -20   -0.30   11.70
  17  -3  20    1.90   13.00
  17  -3  20   15.10   74.79
 -16   2 -20    4.40   10.20
 -16   2 -20   -8.40   13.00
 -16   2 -20  -25.10   40.40
  16  -2  20   -2.30   10.50
  16  -2  20    0.20    6.10
  16  -2  20   32.70   58.79
 -15   1 -20   41.30    9.90
 -15   1 -20   -1.40   37.80
 -15   1 -20   34.20   14.10
  15  -1  20   11.70    6.20
  15  -1  20  -32.90   46.70
  15  -1  20   18.50   10.30
 -14   0 -20   56.99   17.00
 -14   0 -20   97.69   15.60
 -14   0 -20  115.79   37.50
  14   0  20   70.99   13.20
  14   0  20   92.39   15.40
  14   0  20   78.39   46.60
 -13  -1 -20  171.38   26.70
 -13  -1 -20  174.58   28.30
 -13  -1 -20  157.48   39.30
  13   1  20  199.48   27.10
  13   1  20  140.29   24.90
  13   1  20  267.57   48.40
 -12  -2 -20   83.99   17.20
 -12  -2 -20   51.19   30.30
  12   2  20   87.59   15.90
  12   2  20   86.59   13.80
  12   2  20  133.19   35.80
 -11  -3 -20   40.60   11.70
 -11  -3 -20   13.10   28.90
 -11  -3 -20   55.79   10.00
  11   3  20   15.40   29.40
 -10  -4 -20   21.60   26.10
 -10  -4 -20    7.30    7.80
 -10  -4 -20   10.50    8.40
  10   4  20    4.00    7.50
  10   4  20    7.50   26.00
  -9  -5 -20   70.49   31.80
  -9  -5 -20   59.99   15.70
  -9  -5 -20   89.09   15.50
   9   5  20   87.79   15.60
   9   5  20  108.39   29.80
   9   5  20  110.99   16.10
  -8  -6 -20   74.39   34.90
  -8  -6 -20   54.69   14.40
  -8  -6 -20   73.49   14.50
   8   6  20   87.09   27.20
   8   6  20  109.49   15.30
  -7  -7 -20    4.90   33.70
  -7  -7 -20   21.90    8.70
  -7  -7 -20   38.90   10.00
   7   7  20    8.50    8.20
   7   7  20   25.40    8.60
   7   7  20   74.79   26.30
  -6  -8 -20  -11.10    9.20
  -6  -8 -20  -22.50   36.80
  -6  -8 -20   -2.60    8.50
   6   8  20   -5.30    2.90
   6   8  20   10.70    8.00
   6   8  20    9.20   29.50
  -5  -9 -20   11.20   10.20
  -5  -9 -20   19.40    9.30
  -5  -9 -20    4.90   43.30
   5   9  20    2.80    3.80
   5   9  20    4.60    9.30
   5   9  20   20.50    8.10
   5   9  20   13.00   33.00
  -4 -10 -20   15.60   49.40
  -4 -10 -20   17.50   12.40
   4  10  20    5.30   34.10
   4  10  20   19.10   10.80
   4  10  20   15.30    4.70
  -3 -11 -20  -39.50   58.29
  -3 -11 -20   19.00   15.40
  -3 -11 -20  -14.40   13.60
   3  11  20    4.90    4.50
   3  11  20   17.00    9.60
   3  11  20  -11.40   43.00
  -2 -12 -20  -14.90   17.20
  -2 -12 -20  -49.70   66.09
   2  12  20    5.50    5.10
   2  12  20   26.20   46.70
   2  12  20   -4.00   10.00
  -1 -13 -20   23.10   20.10
   0 -14 -20   81.39   27.10
   0  14  20   67.69   16.80
   1 -15 -20   71.69   28.00
   2 -16 -20    1.30   30.60
   3 -17 -20  -22.10   34.10
   4 -18 -20   14.60   45.60
  20  -7  19    6.60   19.60
 -18   5 -19  -12.90   15.70
  18  -5  19   11.00   14.40
 -17   4 -19   20.40   15.90
 -17   4 -19   68.59   52.09
 -17   4 -19   30.70   13.80
  17  -4  19   59.39   72.79
 -16   3 -19   70.39   15.10
 -16   3 -19   74.89   17.00
 -16   3 -19   83.99   46.40
  16  -3  19   58.19   11.40
  16  -3  19  -31.10   55.39
  16  -3  19   96.49   16.00
 -15   2 -19  104.19   41.00
 -15   2 -19   90.69   15.80
 -15   2 -19   76.79   17.60
  15  -2  19   41.80   55.19
  15  -2  19   73.99   13.10
  15  -2  19   73.09   15.10
 -14   1 -19   32.90   11.90
 -14   1 -19   20.30   13.20
 -14   1 -19   27.90   31.80
  14  -1  19   37.00   46.30
  14  -1  19   52.69    8.80
  14  -1  19   50.89   10.80
 -13   0 -19    5.60   11.00
 -13   0 -19    3.00    7.50
 -13   0 -19   18.50   28.20
  13   0  19   -0.50    4.70
  13   0  19  -12.40    7.00
  13   0  19  -18.30   34.80
 -12  -1 -19   83.59   27.20
 -12  -1 -19   57.99   12.80
 -12  -1 -19   59.19   10.90
  12   1  19   11.10   30.40
 -11  -2 -19  161.18   22.00
 -11  -2 -19  154.88   21.10
  11   2  19   11.30   74.89
  11   2  19  112.59   20.00
 -10  -3 -19  218.88   38.10
 -10  -3 -19  176.08   23.10
 -10  -3 -19  146.69   23.70
  10   3  19  122.29   21.50
  -9  -4 -19   59.09   26.80
  -9  -4 -19   46.80   12.20
  -9  -4 -19   55.99   11.60
   9   4  19   71.09   11.90
   9   4  19   24.50   26.00
   9   4  19   80.19   12.30
  -8  -5 -19   35.40   26.30
  -8  -5 -19   13.30    7.50
  -8  -5 -19   11.20    7.90
   8   5  19   25.20    7.00
   8   5  19    4.70    6.90
   8   5  19   17.10   22.10
  -7  -6 -19   -2.40    6.20
  -7  -6 -19    2.50    7.40
  -7  -6 -19   14.10   27.30
   7   6  19   -4.80    6.10
   7   6  19  -21.70   21.80
   7   6  19   -3.00    6.60
  -6  -7 -19   -5.60    7.40
  -6  -7 -19    6.50   29.90
  -6  -7 -19    9.00    7.30
   6   7  19   17.00    6.80
   6   7  19   26.60   24.20
  -5  -8 -19    9.90    7.90
  -5  -8 -19   11.90    8.70
  -5  -8 -19   -5.50   33.70
   5   8  19    2.60    7.00
   5   8  19    1.70    2.90
   5   8  19    4.50    6.50
   5   8  19   -3.80   23.60
  -4  -9 -19   29.10   10.80
  -4  -9 -19   28.50    9.50
  -4  -9 -19   52.09   38.50
   4   9  19   33.40    5.70
   4   9  19    2.30   28.20
  -3 -10 -19   69.99   14.00
  -3 -10 -19   20.90   15.00
  -3 -10 -19   88.19   48.50
   3  10  19   35.80   11.50
   3  10  19   47.90   32.90
   3  10  19   48.80    8.10
  -2 -11 -19  142.39   84.49
  -2 -11 -19   94.99   24.80
   2  11  19  128.59   18.40
   2  11  19  118.79   20.40
   2  11  19  113.69   43.80
  -1 -12 -19   44.10   67.79
  -1 -12 -19  143.99   26.80
   1  12  19  110.79   18.20
   1  12  19  138.59   21.50
   1  12  19   34.40   47.60
   0 -13 -19   76.39   23.50
   0  13  19   62.69   11.20
   0  13  19   72.09   14.20
   0  13  19   65.69   52.29
   1 -14 -19   20.30   23.00
  -1  14  19   28.50    7.70
  -1  14  19   11.70   12.70
   2 -15 -19  -19.20   24.70
   3 -16 -19  -13.30   29.30
   4 -17 -19   19.80   37.10
 -20   8 -18   18.70   13.80
  20  -8  18   10.70   21.20
 -19   7 -18   39.60   13.30
  19  -7  18   37.60   19.10
 -18   6 -18   11.10   11.10
  18  -6  18   22.90   15.80
 -17   5 -18   -4.00   52.69
  17  -5  18   33.00   14.30
  17  -5  18   57.69   74.29
 -16   4 -18   13.80   14.30
 -16   4 -18    1.50   44.90
 -16   4 -18   32.90   11.60
  16  -4  18   10.60   11.00
  16  -4  18    3.20    5.20
  16  -4  18   17.50   68.79
 -15   3 -18   17.80   10.00
 -15   3 -18   15.70   36.70
 -15   3 -18   26.50   11.80
  15  -3  18   25.90    5.90
  15  -3  18   19.00    9.50
  15  -3  18  -58.09   55.69
 -14   2 -18  127.29   37.10
 -14   2 -18   88.59   15.60
  14  -2  18   65.89   12.30
  14  -2  18   -3.00   48.50
  14  -2  18   82.49   14.10
 -13   1 -18  128.39   21.70
 -13   1 -18  201.08   37.00
 -13   1 -18  107.99   20.30
  13  -1  18  123.49   19.30
  13  -1  18   60.29   43.80
  13  -1  18  157.28   21.30
 -12   0 -18  124.79   19.20
 -12   0 -18  144.49   21.20
  12   0  18  120.99   35.80
  12   0  18   92.09   19.20
  12   0  18  124.39   18.20
 -11  -1 -18  159.78   21.30
 -11  -1 -18  120.79   20.30
  11   1  18  148.49   20.60
  11   1  18  112.89   19.40
 -10  -2 -18   25.70    7.70
 -10  -2 -18    9.50    6.20
  10   2  18   36.60   50.69
  10   2  18   43.70   23.60
  10   2  18   11.20    6.50
  -9  -3 -18    0.60    5.60
  -9  -3 -18   -2.50    6.80
   9   3  18   19.20   20.40
   9   3  18   13.30   51.89
   9   3  18  -10.80    5.80
  -8  -4 -18   -3.30    6.70
  -8  -4 -18    0.10    5.40
  -8  -4 -18   -9.50   20.60
   8   4  18    4.80   18.60
   8   4  18   -6.70    5.60
   8   4  18  -14.40    5.30
  -7  -5 -18   22.10   21.90
  -7  -5 -18   12.40    7.10
  -7  -5 -18   21.10    7.20
   7   5  18   21.60    6.50
   7   5  18   18.40    6.50
   7   5  18   26.10   18.60
  -6  -6 -18  115.29   31.40
  -6  -6 -18   85.09   16.50
  -6  -6 -18   95.49   16.50
   6   6  18  106.79   16.00
  -5  -7 -18  241.58   33.20
  -5  -7 -18  314.87   50.59
   5   7  18  196.68   32.70
   5   7  18  212.88   32.60
   5   7  18  201.28   43.10
  -4  -8 -18  242.68   36.10
   4   8  18  229.58   35.90
   4   8  18  236.08   37.10
   4   8  18  253.37   44.60
  -3  -9 -18  180.18   30.70
  -3  -9 -18  237.78   49.60
   3   9  18  197.68   41.00
   3   9  18  159.88   29.80
   3   9  18  216.58   28.40
  -2 -10 -18   79.69   18.50
  -2 -10 -18   47.70   15.30
  -2 -10 -18   54.29   13.20
  -2 -10 -18  111.89   46.10
   2  10  18   83.19   14.00
   2  10  18   84.89   11.50
   2  10  18   54.29   33.70
  -1 -11 -18    6.60   12.30
  -1 -11 -18   36.50   49.60
  -1 -11 -18   10.40   15.50
   1  11  18    7.70   34.70
   1  11  18   -1.90    3.90
   1  11  18   25.60   10.00
   0 -12 -18   -4.20   17.40
   0 -12 -18  -13.80   13.10
   0  12  18    6.90    8.60
   0  12  18    1.30    4.50
   1 -13 -18   -8.10   18.90
  -1  13  18    5.50    4.90
  -1  13  18   -3.30    9.00
  -1  13  18   21.10   49.50
   2 -14 -18   -5.20   20.60
  -2  14  18   -0.80   11.10
  -2  14  18    2.00    5.60
   3 -15 -18   -0.90   22.80
   4 -16 -18   44.60   29.20
   5 -17 -18    6.00   33.40
   6 -18 -18    7.90   43.00
 -20   9 -17   35.00   14.80
  20  -9  17   33.20   25.60
 -19   8 -17   14.80   13.40
  19  -8  17   12.20   20.10
 -18   7 -17   -5.80   10.70
  18  -7  17   19.10   17.70
 -17   6 -17  153.48   58.79
 -17   6 -17   56.79   13.20
  17  -6  17   70.49   17.40
 -16   5 -17   52.39   15.10
 -16   5 -17   34.30    9.80
 -16   5 -17   53.89   42.70
  16  -5  17   42.80    7.90
  16  -5  17   36.70   12.70
 -15   4 -17  114.69   21.70
 -15   4 -17  149.88   43.10
  15  -4  17   38.40   56.69
  15  -4  17  139.29   21.50
  15  -4  17  114.49   18.50
 -14   3 -17   74.09   37.90
 -14   3 -17   71.29   14.20
  14  -3  17  -12.90   48.40
  14  -3  17   62.79   10.70
 -13   2 -17    9.40   28.80
 -13   2 -17    7.80    6.90
 -13   2 -17    0.00    8.50
  13  -2  17    6.40    4.00
  13  -2  17    6.30   37.80
 -12   1 -17  -15.90   24.10
 -12   1 -17    3.60    5.90
 -12   1 -17    5.40    7.50
  12  -1  17    0.70    5.60
  12  -1  17    0.30    3.40
  12  -1  17   53.49   98.19
  12  -1  17  -27.90   33.50
 -11   0 -17   -6.60    7.80
 -11   0 -17  -10.40    5.10
 -11   0 -17   26.30   21.00
  11   0  17   -0.60   52.09
  11   0  17   -4.90   25.10
  11   0  17   -2.90    3.40
  11   0  17   -7.50    5.10
 -10  -1 -17   12.10    8.30
 -10  -1 -17   11.40   20.20
 -10  -1 -17   23.20    6.70
  10   1  17   62.19   25.40
  10   1  17   27.20    6.90
  10   1  17   30.80    5.20
  10   1  17  -37.10   52.49
  -9  -2 -17   56.29   10.00
  -9  -2 -17   74.89   22.30
   9   2  17   53.09    9.10
   9   2  17   91.09   23.40
  -8  -3 -17  197.98   38.70
  -8  -3 -17  223.18   31.70
  -8  -3 -17  186.88   31.80
   8   3  17  244.58   31.70
   8   3  17  164.88   38.90
  -7  -4 -17  398.16   59.69
  -7  -4 -17  343.97   53.29
   7   4  17  383.46   53.29
   7   4  17  340.07   57.99
  -6  -5 -17  272.07   36.20
  -6  -5 -17  229.08   35.80
   6   5  17  269.07   42.30
   6   5  17  224.18   35.80
  -5  -6 -17  153.88   22.50
  -5  -6 -17  165.38   33.70
  -5  -6 -17  117.19   22.10
   5   6  17  154.78   22.00
   5   6  17  154.38   29.60
  -4  -7 -17   48.70    8.70
  -4  -7 -17   31.30    8.40
  -4  -7 -17   57.99   26.80
   4   7  17   30.00    5.30
   4   7  17   23.60    7.70
  -3  -8 -17    1.20    6.10
  -3  -8 -17  -20.40   28.40
  -3  -8 -17    3.40    7.50
   3   8  17   -0.10    2.30
   3   8  17   -0.40    6.50
   3   8  17    4.00   21.30
   3   8  17    6.80    5.10
  -2  -9 -17   29.30   34.40
  -2  -9 -17   21.60    6.80
  -2  -9 -17   18.40    9.40
   2   9  17   19.00    4.00
   2   9  17   38.90   25.50
   2   9  17   17.60    7.70
  -1 -10 -17   37.60   11.60
  -1 -10 -17   25.90    8.00
  -1 -10 -17   23.20   39.70
   1  10  17   40.60    9.40
   1  10  17   27.10   27.50
   1  10  17   30.90    6.00
   0 -11 -17   37.30   48.10
   0 -11 -17   11.60   11.10
   0 -11 -17   15.80   11.00
   0  11  17   18.30   10.10
   0  11  17    0.30    3.60
   0  11  17    7.60    7.20
   0  11  17  -12.80   32.00
   1 -12 -17   -5.30   12.40
  -1  12  17   -2.60    7.10
  -1  12  17    3.60    4.30
  -1  12  17  -10.80   39.90
   2 -13 -17  -20.90   18.30
  -2  13  17   18.80    5.10
  -2  13  17   -0.80    9.30
  -2  13  17  -12.80   46.80
  -3  14  17    5.20    9.70
   4 -15 -17   -3.40   25.10
  -4  15  17  -11.80   11.30
   5 -16 -17    5.10   27.20
   6 -17 -17   23.70   31.50
   7 -18 -17  -13.30   36.50
 -19   9 -16   33.00   13.40
  19  -9  16   48.20   23.40
 -18   8 -16   81.29   16.30
  18  -8  16   81.99   22.10
 -17   7 -16   87.09   15.80
  17  -7  16   75.09   19.80
 -16   6 -16   21.40    9.00
 -16   6 -16   22.20   15.20
 -16   6 -16   27.40   48.50
  16  -6  16  -51.89   73.69
  16  -6  16   30.30    7.30
 -15   5 -16  -27.20   45.60
 -15   5 -16  -51.79   38.70
 -15   5 -16   -3.50    6.60
  15  -5  16  -16.40   56.39
  15  -5  16    2.60    4.00
  15  -5  16   16.30    9.40
 -14   4 -16   -0.80    5.00
 -14   4 -16   -2.60    9.90
 -14   4 -16  -66.39   43.90
 -14   4 -16   24.50   35.40
  14  -4  16    0.50    7.80
  14  -4  16    2.30   49.00
  14  -4  16    0.00    3.70
 -13   3 -16    5.40    7.10
 -13   3 -16   -8.50    8.00
 -13   3 -16    8.00   30.00
  13  -3  16   -2.40    3.40
  13  -3  16    2.90    6.10
  13  -3  16  -13.10   42.00
 -12   2 -16  -15.70   24.00
 -12   2 -16   10.80    7.70
 -12   2 -16  -18.40   42.00
 -12   2 -16   12.40    6.20
  12  -2  16    7.30    3.60
  12  -2  16    8.20    6.10
  12  -2  16    8.60   35.60
 -11   1 -16   51.99    8.90
 -11   1 -16   88.29   23.50
  11  -1  16   43.80    9.10
  11  -1  16   42.90    8.00
  11  -1  16  108.49   29.30
  11  -1  16  -34.00   46.90
 -10   0 -16  302.57   43.40
 -10   0 -16  317.47   42.90
  10   0  16  329.27   53.29
  10   0  16  260.07   42.50
  -9  -1 -16  251.77   34.70
   9   1  16  252.87   34.70
   9   1  16  258.07   43.60
   9   1  16  205.58   34.20
  -8  -2 -16  195.68   31.20
   8   2  16  216.68   31.30
   8   2  16  260.37   38.90
  -7  -3 -16   61.29   12.60
  -7  -3 -16  103.99   22.10
  -7  -3 -16   64.49   12.90
   7   3  16   84.39   12.60
   7   3  16  106.29   20.10
  -5  -5 -16  152.78   24.60
  -5  -5 -16  180.28   32.80
  -5  -5 -16  155.98   24.80
   5   5  16  173.18   31.80
   5   5  16  174.18   24.50
  -4  -6 -16  111.39   16.90
   4   6  16   94.59   16.70
   4   6  16  151.48   26.40
  -3  -7 -16  148.49   33.80
   3   7  16  154.58   30.80
   3   7  16  153.88   22.40
  -2  -8 -16   27.60   26.30
  -2  -8 -16   25.00    7.80
  -2  -8 -16    4.90    6.80
   2   8  16   21.20    6.40
   2   8  16   16.50   20.40
  -1  -9 -16   22.80    9.50
  -1  -9 -16  -10.80   30.50
  -1  -9 -16    5.40    8.50
  -1  -9 -16    5.50    5.90
   1   9  16   11.90    6.60
   1   9  16   16.20    5.30
   1   9  16    7.70    3.00
   1   9  16   28.90   24.00
   0 -10 -16    3.70    6.10
   0 -10 -16  -13.00   35.30
   0 -10 -16   -7.10   12.20
   0 -10 -16    6.60    8.90
   0  10  16    0.30    5.20
   0  10  16   22.20   26.90
   0  10  16   -2.30    2.90
   0  10  16   -0.20    7.40
   1 -11 -16   16.50    6.80
   1 -11 -16  -12.60   10.60
   1 -11 -16    0.80   14.80
  -1  11  16    4.40    5.90
  -1  11  16    1.40    9.20
  -1  11  16    1.00    3.50
  -1  11  16  -30.40   31.30
   2 -12 -16    4.80   12.30
   2 -12 -16   12.70   16.20
  -2  12  16   13.40   38.90
  -2  12  16    7.30    7.60
  -2  12  16   24.20    4.90
   3 -13 -16   66.89   19.30
  -3  13  16   37.80    7.60
  -3  13  16  -18.50   48.80
   4 -14 -16  123.89   28.00
   5 -15 -16   23.20   24.50
  -5  15  16   32.70   13.40
   6 -16 -16   23.00   27.60
   7 -17 -16    4.60   30.30
 -19  10 -15    4.00   12.90
  19 -10  15   39.60   21.90
 -18   9 -15    6.70   17.80
  18  -9  15   41.10   37.50
 -17   8 -15    6.80    8.90
  17  -8  15    1.70   15.40
 -16   7 -15   -6.00    7.30
 -16   7 -15  -35.10   46.30
 -16   7 -15    4.80   15.20
  16  -7  15   14.60   12.50
 -15   6 -15  -12.50   12.30
 -15   6 -15   16.70   40.90
 -15   6 -15   12.60    6.30
 -15   6 -15  -52.09   57.89
  15  -6  15  -10.00   56.49
  15  -6  15    9.10   10.50
  15  -6  15   -0.50    4.30
 -14   5 -15  -14.60   42.80
 -14   5 -15  -31.70   34.80
 -14   5 -15   -6.30    9.80
 -14   5 -15    6.50    5.20
  14  -5  15  -15.20   50.59
  14  -5  15   -6.90    8.50
  14  -5  15    4.00    3.60
 -13   4 -15   79.79   15.70
 -13   4 -15  144.29   34.50
 -13   4 -15  115.59   43.00
 -13   4 -15   82.79   17.30
  13  -4  15  120.39   15.30
  13  -4  15   55.69   47.00
 -12   3 -15  210.18   50.19
  12  -3  15  302.57   41.00
  12  -3  15  273.67   41.60
 -11   2 -15  206.68   31.60
 -11   2 -15  206.18   32.30
  11  -2  15  215.68   31.00
  11  -2  15  217.98   31.80
 -10   1 -15   83.19   22.40
 -10   1 -15   83.79   13.20
 -10   1 -15   61.69   13.90
  10  -1  15  122.79   29.20
  10  -1  15   91.09   12.50
  10  -1  15   75.69   13.30
  -9   0 -15   18.50   16.00
  -9   0 -15   -6.10    4.20
  -9   0 -15    2.20    5.40
   9   0  15    1.40    2.80
   9   0  15   -0.80    4.30
   9   0  15   20.90   20.30
   9   0  15  -39.70   26.30
  -8  -1 -15  103.19   20.40
  -8  -1 -15   82.89   11.00
   8   1  15   25.60   34.70
   8   1  15   56.99   10.50
  -7  -2 -15  209.38   34.00
  -7  -2 -15  218.98   34.30
   7   2  15  277.87   40.10
   7   2  15  255.37   34.20
  -6  -3 -15  201.78   31.20
  -6  -3 -15  219.68   31.20
  -6  -3 -15  258.47   36.80
   6   3  15  180.68   35.50
  -5  -4 -15  269.27   38.80
  -5  -4 -15  285.87   44.50
   5   4  15  232.28   42.60
   5   4  15  267.27   38.60
  -4  -5 -15   33.60    6.30
  -4  -5 -15   19.00   16.60
   4   5  15   37.00   14.50
   4   5  15   -7.20   45.10
  -3  -6 -15    3.20    4.50
  -3  -6 -15   -9.40    4.50
  -3  -6 -15   15.50   17.30
   3   6  15    5.60   13.80
   3   6  15    3.50    4.00
   3   6  15    2.80    1.70
  -2  -7 -15   74.69   12.00
  -2  -7 -15   58.09   10.80
  -2  -7 -15   76.79   27.50
   2   7  15   62.79   11.10
   2   7  15   42.90   19.30
   2   7  15   73.69    9.70
   2   7  15   51.09   10.80
  -1  -8 -15   13.60    5.20
  -1  -8 -15  -31.10   23.40
  -1  -8 -15   17.00    7.00
   1   8  15   20.60   18.50
   1   8  15    1.90    4.10
   1   8  15    3.10    4.90
   1   8  15    2.80    2.00
   0  -9 -15  -25.20   28.70
   0  -9 -15   19.30   10.90
   0  -9 -15   11.10    8.10
   0  -9 -15    6.80    5.50
   0   9  15   10.70    6.90
   0   9  15    1.90    2.60
   0   9  15   16.80    5.20
   0   9  15   11.40   21.50
   1 -10 -15   72.99   15.70
   1 -10 -15  145.89   42.10
   1 -10 -15  105.49   18.10
   1 -10 -15  103.79   18.70
  -1  10  15   96.49   14.30
  -1  10  15  150.58   31.40
   2 -11 -15  140.49   24.50
   2 -11 -15  215.88   29.90
   2 -11 -15  130.99   26.60
  -2  11  15  169.68   23.60
  -2  11  15  185.68   40.80
   3 -12 -15   80.69   20.40
  -3  12  15  106.09   16.80
  -3  12  15  109.89   18.30
  -3  12  15  159.98   40.70
  -3  12  15  146.39   21.00
   4 -13 -15  129.59   22.90
   4 -13 -15   50.49   24.30
  -4  13  15   53.49   48.80
  -4  13  15   81.39   15.20
   5 -14 -15   14.90   19.70
  -5  14  15   17.80   10.70
   6 -15 -15    4.60   22.90
  -6  15  15   -3.40   10.80
   7 -16 -15   16.30   26.10
   8 -17 -15  -17.50   27.20
  18 -10  14   39.00   22.50
 -17   9 -14   -5.60    9.00
  17  -9  14    9.40   16.40
 -16   8 -14    2.70    7.20
  16  -8  14   11.00   14.40
 -15   7 -14   35.40   14.00
 -15   7 -14   43.30   51.19
 -15   7 -14   33.70    8.90
  15  -7  14   64.29   13.40
  15  -7  14   -3.50   62.49
  15  -7  14   27.90    6.70
 -14   6 -14   33.30    8.80
 -14   6 -14   50.19   13.90
 -14   6 -14   95.69   42.20
  14  -6  14   52.49   11.90
  14  -6  14  -20.10   54.89
  14  -6  14   47.00    7.90
 -12   4 -14  -24.10   28.20
  12  -4  14  -17.50   39.90
 -11   3 -14   68.49   33.10
 -11   3 -14   29.20    5.90
 -11   3 -14   51.29   25.20
  11  -3  14   35.70    7.80
  11  -3  14  -34.40   28.30
 -10   2 -14  185.18   32.20
 -10   2 -14  220.68   31.70
  10  -2  14  223.08   31.20
  10  -2  14  219.98   31.70
  -9   1 -14  488.15   75.39
  -9   1 -14  561.14   79.69
   9  -1  14  534.65   75.49
  -8   0 -14   96.59   16.30
  -8   0 -14  115.99   16.70
   8   0  14  108.99   15.80
  -7  -1 -14   94.69   14.80
   7   1  14   94.49   14.00
  -6  -2 -14    5.50    3.20
  -6  -2 -14   -1.80    4.20
  -6  -2 -14    5.60   12.70
   6   2  14    3.70    3.70
   6   2  14   -2.10    3.90
   6   2  14   -3.50   11.90
   6   2  14   52.89   29.60
  -5  -3 -14   26.20    5.10
  -5  -3 -14   21.20    5.30
  -5  -3 -14   14.00   12.30
   5   3  14   19.80    4.80
   5   3  14  -13.00   29.90
   5   3  14   23.60   12.00
  -4  -4 -14   -3.90    3.30
  -4  -4 -14   -3.50    3.80
  -4  -4 -14    0.60   12.60
   4   4  14   -3.90    3.30
   4   4  14   12.60   11.00
   4   4  14   -0.40    3.00
[truncated: 6,651,121 more chars]
